# Supplementary material for: The Toxoplasma monocarboxylate transporters are involved in the metabolism within the apicoplast and are linked to parasite survival
Source: eLife journal article supplement (doi:10.7554/elife.88866), 2023-07-12
Supplement: fig6-data1 [file Figure 6-Source Data.xlsx]

## Sheet: Figure 6C
3nd experiment							2nd experiment							1st experiment
Days	TIR1	AMT1-AID	AMT2-AID	dKD			Days	TIR1	AMT1-AID	AMT2-AID	dKD			Days	TIR1 +AA	AMT1-AID	AMT2-AID	dKD
10							10							9	1
10							10							9	1
11	1						11							10	1
11	1						11							10	1
12	1						12		1					10	1
13		1					13							10		1
13		1					13		1					11		1
14		1					14		1					11		1
14		1					14		1					13		1
15		1	0	0			15			0	0			14		1
9							9							13
9							9							14
10							10							15			0	0
10	1						10							20			0	0
10	1						10	1
10							10
11							11
15			0	0			15			0	0
9							9
9							9	1
10							10	1
10							10	1
10							10	1
10							10
15			0	0			15			0	0
16							15
16							16
17							17
17							18			0	0
19							19
19							20			0	0
20			0	0
