# Supplementary material for: The Toxoplasma monocarboxylate transporters are involved in the metabolism within the apicoplast and are linked to parasite survival
Source: eLife. 2024 Mar 19;12:RP88866. doi: 10.7554/eLife.88866 (PMC10950331; doi:10.7554/eLife.88866)
Supplement: Supplementary file 1. — (a) Selection of candidates from previous studies of HyperLOPIT AND PfACP-BirA. (b) Lines used in this study. (c) Plasmids used in this study. (d) Primers used in this study. [file elife-88866-supp1.xlsx]

## Sheet: Supplementary file 1a
Supplementary file 1a. Selection of candidates from previous studies of HyperLOPIT AND PfACP-BirA
Gene ID	Description	TMD	Name	Note
TGGT1_309580	Transporter, MFS	8	HAP1	HyperLOPIT
TGGT_267690	hypothetical	6	HAP2	HyperLOPIT
TGGT1_261070	APT1	6	APT1	HyperLOPIT
TGGT1_233540	MFS protein	11	HAP3	PF3D7_0926400.1
				in PfACP-BirA
TGGT1_297245	MFS protein	11	HAP4	PF3D7_0926400.1
				in PfACP- BirA
TGGT1_222310	Hypothetical	7	HAP5	PF3D7_0908300.2
	protein			in PfACP- BirA
TGGT1_249820	ABC transporter	4	HAP6	PF3D7_0302600.1
				in PfACP- BirA
TGGT1_260310	ABC transporter	7	HAP7	PF3D7_1145500.1
				in PfACP- BirA
TGGT1_263740	ABC transporter	5	HAP8	PF3D7_1209900.1
				in PfACP- BirA
TGGT1_226790	ABC	0	HAP9	PF3D7_0813700.1
	transporter			in PfACP- BirA

## Sheet: Supplementary file 1b
Supplementary 1b. Lines used in this study.
No.	Name	Genotype	Aim
1	APT1-TurboID-4Ty	RHΔku80Δhxgprt; APT1-TurboID-4Ty, DHFR-TS:DHFR	Biotinylation
2	HAP1-6Ty	RHΔku80Δhxgprt; HAP1-6Ty, DHFR-TS:DHFR	IFA
3	HAP2-6Ty	RHΔku80Δhxgprt; HAP2-6Ty, DHFR- TS:DHFR	IFA
4	HAP3-6Ty（AMT1-6Ty）	RHΔku80Δhxgprt; HAP3-6Ty, DHFR- TS:DHFR	IFA
5	HAP4-6Ty（AMT2-6Ty）	RHΔku80Δhxgprt; HAP4-6Ty, DHFR- TS:DHFR	IFA
6	HAP5-6Ty	RHΔku80Δhxgprt; HAP5-6Ty, DHFR- TS:DHFR	IFA
7	HAP6-6Ty	RHΔku80Δhxgprt; HAP6-6Ty, DHFR- TS:DHFR	IFA
8	HAP7-6Ty	RHΔku80Δhxgprt; HAP7-6Ty, DHFR- TS:DHFR	IFA
9	HAP8-6Ty	RHΔku80Δhxgprt; HAP8-6Ty, DHFR- TS:DHFR	IFA
10	HAP9-6Ty	RHΔku80Δhxgprt; HAP9-6Ty, DHFR- TS:DHFR	IFA
11	HAP10-6Ty	RHΔku80Δhxgprt; HAP10-6Ty, DHFR- TS:DHFR	IFA
12	HAP11-6Ty	RHΔku80Δhxgprt; HAP11-6Ty, DHFR- TS:DHFR	IFA
13	HAP12-6Ty	RHΔku80Δhxgprt; HAP12-6Ty, DHFR- TS:DHFR	IFA
14	HAP13-6Ty	RHΔku80Δhxgprt; HAP13-6Ty, DHFR- TS:DHFR	IFA
15	HAP14-6Ty	RHΔku80Δhxgprt; HAP14-6Ty, DHFR- TS:DHFR	IFA
16	HAP15-6Ty	RHΔku80Δhxgprt; HAP15-6Ty, DHFR- TS:DHFR	IFA
17	HAP16-6Ty	RHΔku80Δhxgprt; HAP16-6Ty, DHFR- TS:DHFR	IFA
18	HAP17-6Ty	RHΔku80Δhxgprt; HAP17-6Ty, DHFR- TS:DHFR	IFA
19	HAP18-6Ty	RHΔku80Δhxgprt; HAP18-6Ty, DHFR- TS:DHFR	IFA
20	HAP19-6Ty	RHΔku80Δhxgprt; HAP19-6Ty, DHFR- TS:DHFR	IFA
21	HAP20-6Ty	RHΔku80Δhxgprt; HAP20-6Ty, DHFR- TS:DHFR	IFA
22	HAP21-6Ty	RHΔku80Δhxgprt; HAP21-6Ty, DHFR- TS:DHFR	IFA
23	HAP22-6Ty	RHΔku80Δhxgprt; HAP22-6Ty, DHFR- TS:DHFR	IFA
24	HAP23-6Ty	RHΔku80Δhxgprt; HAP23-6Ty, DHFR- TS:DHFR	IFA
25	HAP24-6Ty	RHΔku80Δhxgprt; HAP24-6Ty, DHFR- TS:DHFR	IFA
26	HAP25-6Ty	RHΔku80Δhxgprt; HAP25-6Ty, DHFR- TS:DHFR	IFA
27	HAP26-6Ty	RHΔku80Δhxgprt; HAP26-6Ty, DHFR- TS:DHFR	IFA
28	HAP27-6Ty	RHΔku80Δhxgprt; HAP27-6Ty, DHFR- TS:DHFR	IFA
29	HAP28-6Ty	RHΔku80Δhxgprt; HAP28-6Ty, DHFR- TS:DHFR	IFA
30	HAP29-6Ty	RHΔku80Δhxgprt; HAP29-6Ty, DHFR- TS:DHFR	IFA
31	HAP30-6Ty	RHΔku80Δhxgprt; HAP30-6Ty, DHFR- TS:DHFR	IFA
32	HAP31-6Ty	RHΔku80Δhxgprt; HAP31-6Ty, DHFR- TS:DHFR	IFA
33	HAP32-6Ty	RHΔku80Δhxgprt; HAP32-6Ty, DHFR- TS:DHFR	IFA
34	HAP33-6Ty	RHΔku80Δhxgprt; HAP33-6Ty, DHFR- TS:DHFR	IFA
35	HAP34-6Ty	RHΔku80Δhxgprt; HAP34-6Ty, DHFR- TS:DHFR	IFA
36	HAP35-6Ty	RHΔku80Δhxgprt; HAP35-6Ty, DHFR- TS:DHFR	IFA
37	HAP36-6Ty	RHΔku80Δhxgprt; HAP36-6Ty, DHFR- TS:DHFR	IFA
38	HAP37-6Ty	RHΔku80Δhxgprt; HAP37-6Ty, DHFR- TS:DHFR	IFA
39	HAP38-6Ty	RHΔku80Δhxgprt; HAP38-6Ty, DHFR- TS:DHFR	IFA
40	HAP39-6Ty	RHΔku80Δhxgprt; HAP39-6Ty, DHFR- TS:DHFR	IFA
41	HAP40-6Ty	RHΔku80Δhxgprt; HAP40-6Ty, DHFR- TS:DHFR	IFA
42	HAP41-6Ty	RHΔku80Δhxgprt; HAP41-6Ty, DHFR- TS:DHFR	IFA
43	HAP42-6Ty	RHΔku80Δhxgprt; HAP42-6Ty, DHFR- TS:DHFR	IFA
44	HAP43-6Ty	RHΔku80Δhxgprt; HAP43-6Ty, DHFR- TS:DHFR	IFA
45	HAP44-6Ty	RHΔku80Δhxgprt; HAP44-6Ty, DHFR- TS:DHFR	IFA
46	HAP45-6Ty	RHΔku80Δhxgprt; HAP45-6Ty, DHFR- TS:DHFR	IFA
47	HAP46-6Ty	RHΔku80Δhxgprt; HAP46-6Ty, DHFR-TS:DHFR	IFA
48	HAP47-6Ty	RHΔku80Δhxgprt; HAP47-6Ty, DHFR-TS:DHFR	IFA
49	HAP48-6Ty	RHΔku80Δhxgprt; HAP48-6Ty, DHFR-TS:DHFR	IFA
50	HAP49-6Ty	RHΔku80Δhxgprt; HAP49-6Ty, DHFR-TS:DHFR	IFA
51	HAP50-6Ty	RHΔku80Δhxgprt; HAP50-6Ty, DHFR-TS:DHFR	IFA
52	AMT1-AID	RHΔku80Δhxgprt; TUB1:TIR1-3FLAG, SAG1:CAT; AMT1-AID-6Ty, DHFR-TS:DHFR	Conditional knockdown
53	AMT2-AID	RHΔku80Δhxgprt; TUB1:TIR1-3FLAG, SAG1:CAT; AMT2-AID-6Ty, DHFR-TS:DHFR	Conditional knockdown
54	AMT1-AID/	RHΔku80Δhxgprt; TUB1:TIR1-3FLAG, SAG1:CAT; AMT1-AID-6Ty, DHFR-TS:DHFR; AMT2-AID-3HA, DHFR-TS: HXGPRT	Conditional knockdown
	AMT2-AID (dKD)
55	AMT1-AID/	RHΔku80Δhxgprt; TUB1:TIR1-3FLAG, SAG1:CAT; AMT1-AID-6Ty, DHFR-TS:DHFR; PYK2-AID-3HA, DHFR-TS: HXGPRT	Conditional knockdown
	PYK2-AID
56	AMT2-AID/	RHΔku80Δhxgprt; TUB1:TIR1-3FLAG, SAG1:CAT; AMT2-AID-6Ty, DHFR-TS:DHFR; PYK2-AID-3HA, DHFR-TS: HXGPRT	Conditional knockdown
	PYK2-AID
57	AMT1-AID/	RHΔku80Δhxgprt; TUB1:TIR1-3FLAG, SAG1:CAT; AMT1-AID-6Ty; AMT2-AID-3HA; PYK2-AID-GFP, DHFR-TS: HXGPRT	Conditional knockdown
	AMT2-AID/
	PYK2-AID
58	PYK2-AID	RHΔku80Δhxgprt; TUB1:TIR1-3FLAG, SAG1:CAT; PYK2-AID-3HA, DHFR-TS: HXGPRT	Conditional knockdown
59	AMT1-AID/APT1-6HA	RHΔku80Δhxgprt; TUB1:TIR1-3FLAG, SAG1:CAT; AMT1-AID-6Ty, DHFR-TS:DHFR; APT1-6HA, DHFR-TS-HXGPRT	Western blot
60	AMT2-AID/APT1-6HA	RHΔku80Δhxgprt; TUB1:TIR1-3FLAG, SAG1:CAT; AMT2-AID-6Ty, DHFR-TS:DHFR; APT1-6HA, DHFR-TS-HXGPRT	Western blot
61	AMT1-AID/AMT2-6HA	RHΔku80Δhxgprt; TUB1:TIR1-3FLAG, SAG1:CAT; AMT1-AID-6Ty, DHFR-TS:DHFR; AMT2-6HA, DHFR-TS-HXGPRT	Western blot
61	AMT2-AID/AMT1-6HA	RHΔku80Δhxgprt; TUB1:TIR1-3FLAG, SAG1:CAT; AMT2-AID-6Ty, DHFR-TS:DHFR; AMT1-6HA, DHFR-TS-HXGPRT	Western blot
62	AMT1-AID/ACC1-6HA	RHΔku80Δhxgprt; TUB1:TIR1-3FLAG, SAG1:CAT; AMT1-AID-6Ty, DHFR-TS:DHFR; ACC1-6HA, DHFR-TS-HXGPRT	Western blot
63	AMT2-AID/ACC1-6HA	RHΔku80Δhxgprt; TUB1:TIR1-3FLAG, SAG1:CAT; AMT2-AID-6Ty, DHFR-TS:DHFR; ACC1-6HA, DHFR-TS-HXGPRT	Western blot
64	AMT1-6Ty/AMT2-6HA	RHΔku80Δhxgprt; AMT1-6Ty, DHFR-TS:DHFR; AMT2-6HA, DHFR-TS-HXGPRT	IFA
65	AMT1-AID/ACC1-AID	RHΔku80Δhxgprt; AMT1-6Ty, DHFR-TS:DHFR; ACC1-AID-3HA, DHFR-TS-HXGPRT	Conditional knockdown
66	ACC1-AID	RHΔku80Δhxgprt; AMT1-6Ty, DHFR-TS:DHFR; ACC1-AID-3HA, DHFR-TS-HXGPRT	Conditional knockdown

## Sheet: Supplementary file 1c
Supplementary 1c. Plasmids used in this study.
No.	Plasmid Name	Genotype	Application
1	pCas9-APT1 sgRNA 3’	SAG1:Cas9, U6: APT1 sgRNA 3’	C-terminal Tagging
2	pCas9-HAP1 sgRNA 3’	SAG1:Cas9, U6: HAP1 sgRNA 3’	C-terminal Tagging
3	pCas9-HAP2 sgRNA 3’	SAG1:Cas9, U6: HAP2 sgRNA 3’	C-terminal Tagging
4	pCas9-HAP3 sgRNA 3’	SAG1:Cas9, U6: HAP3 sgRNA 3’	C-terminal Tagging
5	pCas9-HAP4 sgRNA 3’	SAG1:Cas9, U6: HAP4 sgRNA 3’	C-terminal Tagging
6	pCas9-HAP5 sgRNA 3’	SAG1:Cas9, U6: HAP5 sgRNA 3’	C-terminal Tagging
7	pCas9-HAP6 sgRNA 3’	SAG1:Cas9, U6: HAP6 sgRNA 3’	C-terminal Tagging
8	pCas9-HAP7 sgRNA 3’	SAG1:Cas9, U6: HAP7 sgRNA 3’	C-terminal Tagging
9	pCas9-HAP8 sgRNA 3’	SAG1:Cas9, U6: HAP8 sgRNA 3’	C-terminal Tagging
10	pCas9-HAP9 sgRNA 3’	SAG1:Cas9, U6: HAP9 sgRNA 3’	C-terminal Tagging
11	pCas9-HAP10 sgRNA 3’	SAG1:Cas9, U6: HAP10 sgRNA 3’	C-terminal Tagging
12	pCas9-HAP11 sgRNA 3’	SAG1:Cas9, U6: HAP11 sgRNA 3’	C-terminal Tagging
13	pCas9-HAP12 sgRNA 3’	SAG1:Cas9, U6: HAP12 sgRNA 3’	C-terminal Tagging
14	pCas9-HAP13 sgRNA 3’	SAG1:Cas9, U6: HAP13 sgRNA 3’	C-terminal Tagging
15	pCas9-HAP14 sgRNA 3’	SAG1:Cas9, U6: HAP14 sgRNA 3’	C-terminal Tagging
16	pCas9-HAP15 sgRNA 3’	SAG1:Cas9, U6: HAP15 sgRNA 3’	C-terminal Tagging
17	pCas9-HAP16 sgRNA 3’	SAG1:Cas9, U6: HAP16 sgRNA 3’	C-terminal Tagging
18	pCas9-HAP17 sgRNA 3’	SAG1:Cas9, U6: HAP17 sgRNA 3’	C-terminal Tagging
19	pCas9-HAP18 sgRNA 3’	SAG1:Cas9, U6: HAP18 sgRNA 3’	C-terminal Tagging
20	pCas9-HAP19 sgRNA 3’	SAG1:Cas9, U6: HAP19 sgRNA 3’	C-terminal Tagging
21	pCas9-HAP20 sgRNA 3’	SAG1:Cas9, U6: HAP20 sgRNA 3’	C-terminal Tagging
22	pCas9-HAP21 sgRNA 3’	SAG1:Cas9, U6: HAP21 sgRNA 3’	C-terminal Tagging
23	pCas9-HAP22 sgRNA 3’	SAG1:Cas9, U6: HAP22 sgRNA 3’	C-terminal Tagging
24	pCas9-HAP23 sgRNA 3’	SAG1:Cas9, U6: HAP23 sgRNA 3’	C-terminal Tagging
25	pCas9-HAP24 sgRNA 3’	SAG1:Cas9, U6: HAP24 sgRNA 3’	C-terminal Tagging
26	pCas9-HAP25 sgRNA 3’	SAG1:Cas9, U6: HAP25 sgRNA 3’	C-terminal Tagging
27	pCas9-HAP26 sgRNA 3’	SAG1:Cas9, U6: HAP26 sgRNA 3’	C-terminal Tagging
28	pCas9-HAP27 sgRNA 3’	SAG1:Cas9, U6: HAP27 sgRNA 3’	C-terminal Tagging
29	pCas9-HAP28 sgRNA 3’	SAG1:Cas9, U6: HAP28 sgRNA 3’	C-terminal Tagging
30	pCas9-HAP29 sgRNA 3’	SAG1:Cas9, U6: HAP29 sgRNA 3’	C-terminal Tagging
31	pCas9-HAP30 sgRNA 3’	SAG1:Cas9, U6: HAP30 sgRNA 3’	C-terminal Tagging
32	pCas9-HAP31 sgRNA 3’	SAG1:Cas9, U6: HAP31 sgRNA 3’	C-terminal Tagging
33	pCas9-HAP32 sgRNA 3’	SAG1:Cas9, U6: HAP32 sgRNA 3’	C-terminal Tagging
34	pCas9-HAP33 sgRNA 3’	SAG1:Cas9, U6: HAP33 sgRNA 3’	C-terminal Tagging
35	pCas9-HAP34 sgRNA 3’	SAG1:Cas9, U6: HAP34 sgRNA 3’	C-terminal Tagging
36	pCas9-HAP35 sgRNA 3’	SAG1:Cas9, U6: HAP35 sgRNA 3’	C-terminal Tagging
37	pCas9-HAP36 sgRNA 3’	SAG1:Cas9, U6: HAP36 sgRNA 3’	C-terminal Tagging
38	pCas9-HAP37 sgRNA 3’	SAG1:Cas9, U6: HAP37 sgRNA 3’	C-terminal Tagging
39	pCas9-HAP38 sgRNA 3’	SAG1:Cas9, U6: HAP38 sgRNA 3’	C-terminal Tagging
40	pCas9-HAP39 sgRNA 3’	SAG1:Cas9, U6: HAP39 sgRNA 3’	C-terminal Tagging
41	pCas9-HAP40 sgRNA 3’	SAG1:Cas9, U6: HAP40 sgRNA 3’	C-terminal Tagging
42	pCas9-HAP41 sgRNA 3’	SAG1:Cas9, U6: HAP41 sgRNA 3’	C-terminal Tagging
43	pCas9-HAP42 sgRNA 3’	SAG1:Cas9, U6: HAP42 sgRNA 3’	C-terminal Tagging
44	pCas9-HAP43 sgRNA 3’	SAG1:Cas9, U6: HAP43 sgRNA 3’	C-terminal Tagging
45	pCas9-HAP44 sgRNA 3’	SAG1:Cas9, U6: HAP44 sgRNA 3’	C-terminal Tagging
46	pCas9-HAP45 sgRNA 3’	SAG1:Cas9, U6: HAP45 sgRNA 3’	C-terminal Tagging
47	pCas9-HAP46 sgRNA 3’	SAG1:Cas9, U6: HAP46 sgRNA 3’	C-terminal Tagging
48	pCas9-HAP47 sgRNA 3’	SAG1:Cas9, U6: HAP47 sgRNA 3’	C-terminal Tagging
49	pCas9-HAP48 sgRNA 3’	SAG1:Cas9, U6: HAP48 sgRNA 3’	C-terminal Tagging
50	pCas9-HAP49 sgRNA 3’	SAG1:Cas9, U6: HAP49 sgRNA 3’	C-terminal Tagging
51	pCas9-HAP50 sgRNA 3’	SAG1:Cas9, U6: HAP50 sgRNA 3’	C-terminal Tagging
52	pCas9-PYK2 sgRNA 3’	SAG1:Cas9, U6: PYK2 sgRNA 3’	C-terminal Tagging
53	pCas9-ACC1 sgRNA 3’	SAG1:Cas9, U6: ACC1 sgRNA 3’	C-terminal Tagging
54	pLinker-TurboID-4Ty-DHFR-LoxP	Linker-TurboID-4Ty, LoxP-DHFR-TS:DHFR-LoxP	C-terminal Tagging
55	pLinker-6Ty-DHFR-LoxP	Linker-6Ty, LoxP-DHFR-TS:DHFR-LoxP	C-terminal Tagging
56	pLinker-6HA-HXGPRT-LoxP	Linker-6HA, LoxP-DHFR-TS:HXGPRT-LoxP	C-terminal Tagging
57	pLinker-AID-6Ty-DHFR-LoxP	Linker-AID-6Ty, LoxP-DHFR-TS:DHFR-LoxP	C-terminal Tagging
58	pLinker-AID-3HA-HXGPRT-LoxP	Linker-AID-3HA, LoxP-DHFR-TS:HXGPRT-LoxP	C-terminal Tagging
59	pLinker-AID-GFP-DHFR-LoxP	Linker-AID-GFP, LoxP-DHFR-TS:DHFR-LoxP	C-terminal Tagging
60	pET28a-AMT1-HA-AMP	T7 promoter-AMT1-HA, AMPR promoter-AMP	Heterologous expression
61	pET28a-AMT2-Ty-Kan	T7 promoter-AMT2-Ty, AMPR promoter-Kan	Heterologous expression

## Sheet: Supplementary file 1d
Supplementary file 1d. Primers used in this study.
	Templates	Primer pairs and sequence(5’→3‘)	Fragments
TGGT1_261070	pCas9	TAAATGGGGATGTCAAGTT gactgggctgttgagaaacg GTTTTAGAGCTAGAAATAGC	Specific sgRNA
(APT1)	Generic tagging plasmids	L: gcaggcaccctgatctattctctctcgaagaccaagtacgga AGGGCGAATTGGAGCTC	Endogenous Tagging fragments
		T: tccctcgcttctctccccctccccgactgggctgttgagaa TCCCAGTCACGACGTTG
TGGT1_309580	pCas9	TAAATGGGGATGTCAAGTT gcagaactcccagataccca GTTTTAGAGCTAGAAATAGC	Specific sgRNA
(HAP1)	Generic tagging plasmids	L: tcgagatcgaggtgtccgatggagaggcaaactgccctgcc gctagcAAGGGCTCGGG	Endogenous Tagging fragments
		T: tgcctctcgaggagtctcgcattcacagcgcccagccctgg TAGGGCGAATTGGAGCTC
TGGT1_267690	pCas9	TAAATGGGGATGTCAAGTT cttcgatgctttgatgtccg GTTTTAGAGCTAGAAATAGC	Specific sgRNA
(HAP2)	Generic tagging plasmids	L: tttacgacgttcactggtatcttcgctggtcttcgatgctt GCTAGCAAGGGCTCGG	Endogenous Tagging fragments
		T: ccatccgcgggcagggtcagctcgcttctcgctagcctcgg TAGGGCGAATTGGAGCTC
TGGT1_233540	pCas9	TAAATGGGGATGTCAAGTT ggcgggacgtttcttagatg GTTTTAGAGCTAGAAATAGC	Specific sgRNA
(HAP3/AMT1)	Generic tagging plasmids	L: ctccgacacccaggaaacgacactcttttcagaaacagtca GCTAGCAAGGGCTCGG	Endogenous Tagging fragments
		T: attttgtcgtgattgtttctgaaaggcgggacgtttcttag TAGGGCGAATTGGAGCTC
	T. gondii DNA	Fc: ﻿TTCTGCGACTCCGCGTAC	Diagnostic PCR
		Rc1: ﻿CCTTCACGACAGACACCC
		Rc2: ﻿CACTTCTCGTACTATGGCCGG
TGGT1_297245	pCas9	TAAATGGGGATGTCAAGTT gcgcaagtcatacgctcgtg GTTTTAGAGCTAGAAATAGC	Specific sgRNA
(HAP4/AMT2)	Generic tagging plasmids	L: caacagacgcgctgccgtaccgcttcccgacgtactcgccc GCTAGCAAGGGCTCGG	Endogenous Tagging fragments
		T: agcgaaagtcgctccacgagagagacactgattctccacac TAGGGCGAATTGGAGCTC
	T. gondii DNA	Fc: ﻿GTGTGTGTGTATGCACCC	Diagnostic PCR
		Rc1: ﻿﻿CACTTTCGGGCATTGCAT
		Rc2: ﻿CACTTCTCGTACTATGGCCGG
TGGT1_222310	pCas9	TAAATGGGGATGTCAAGTT gccgtttccagacacaacgc GTTTTAGAGCTAGAAATAGC	Specific sgRNA
(HAP5)	Generic tagging plasmids	L: acggcgcgtattaccagcagtactatcctcctcctgctctg GCTAGCAAGGGCTCGG	Endogenous Tagging fragments
		﻿T: accgaaatttgcaaaaaaccagatccacaccttggccagcg TAGGGCGAATTGGAGCTC
TGGT1_249820	pCas9	TAAATGGGGATGTCAAGTT acatgactgcgagactctgt GTTTTAGAGCTAGAAATAGC	Specific sgRNA
(HAP6)	Generic tagging plasmids	L: atgctcaactttttgccgacgaaaaaccgaaggaatctgtt GCTAGCAAGGGCTCGG	Endogenous Tagging fragments
		﻿T: gtttctgttcctttggtgttcacaccgtttgaagacccaca TAGGGCGAATTGGAGCTC
TGGT1_260310	pCas9	TAAATGGGGATGTCAAGTT ggagacgaaacgtccccctg GTTTTAGAGCTAGAAATAGC	Specific sgRNA
(HAP7)	Generic tagging plasmids	L: gggtgtacagacagctcgtgaacatgtcgcgttactcggcg GCTAGCAAGGGCTCGG	Endogenous Tagging fragments
		﻿T: ctttcggccgtagcgcctctttcgctgaggagacgaaacgt TAGGGCGAATTGGAGCTC
TGGT1_263740	pCas9	TAAATGGGGATGTCAAGTT gagcgaacgcctctcagctt GTTTTAGAGCTAGAAATAGC	Specific sgRNA
(HAP8)	Generic tagging plasmids	L: cttcttctctgtgcagcctcgactgcaatgcctcctgcaac GCTAGCAAGGGCTCGG	Endogenous Tagging fragments
		T: agtggttgagagttttttctcatgaagagcgaacgcctctc TAGGGCGAATTGGAGCTC
TGGT1_226790	pCas9	TAAATGGGGATGTCAAGTT gggctgccagttacgttgtg GTTTTAGAGCTAGAAATAGC	Specific sgRNA
(HAP9)	Generic tagging plasmids	L: gaagagtcaaaggtgtaaagaatttgaagaggtggacagag GCTAGCAAGGGCTCGG	Endogenous Tagging fragments
		T: tggacccggagaaaaccaagcgaatccaggcaaccccccac TAGGGCGAATTGGAGCTC
TGGT1_264870	pCas9	TAAATGGGGATGTCAAGTT agtggcgagaggcgaaacaa GTTTTAGAGCTAGAAATAGC	Specific sgRNA
(HAP10)	Generic tagging plasmids	L: ccagcgggatcgcagggaaacaagacacagagagaagcaac GCTAGCAAGGGCTCGG	Endogenous Tagging fragments
		﻿T: ctcctccgctcttgcggttcctctctctctctcttcccttg TAGGGCGAATTGGAGCTC
TGGT1_262660	pCas9	TAAATGGGGATGTCAAGTT acatgtacagccgttgggtc GTTTTAGAGCTAGAAATAGC	Specific sgRNA
(HAP11)	Generic tagging plasmids	L: ctgcttttcttgtaacgcaggttagacgtcttgaatatggg GCTAGCAAGGGCTCGG	Endogenous Tagging fragments
		T: caccctccaaaagccgtttcgagcacatgtacagccgttgg TAGGGCGAATTGGAGCTC
TGGT1_226020	pCas9	TAAATGGGGATGTCAAGTT agacgagggctggtcgcgcc GTTTTAGAGCTAGAAATAGC	Specific sgRNA
(HAP12)	Generic tagging plasmids	L: ccagctcacatggcgaccgtagtgggatcagatacgttccg GCTAGCAAGGGCTCGG	Endogenous Tagging fragments
		T: tttagttctgacatagacaacagaagacgagggctggtcgc TAGGGCGAATTGGAGCTC
TGGT1_320020	pCas9	TAAATGGGGATGTCAAGTT acacgaggatacagcatcac GTTTTAGAGCTAGAAATAGC	Specific sgRNA
(HAP13)	Generic tagging plasmids	L: cggacgaagacccgcgtgcaccgagtccagaggtcgctgtg GCTAGCAAGGGCTCGGGC	Endogenous Tagging fragments
		T: ggcaaaaaaatcgaatcattctcggtccctagactcctgtg TAGGGCGAATTGGAGCTC
TGGT1_280400	pCas9	TAAATGGGGATGTCAAGTT aagcggcgagaagatcagtt GTTTTAGAGCTAGAAATAGC	Specific sgRNA
(HAP14)	Generic tagging plasmids	L: ttcgcgctgtctcgctcttcatcaataccctccttctttcc GCTAGCAAGGGCTCGG	Endogenous Tagging fragments
		T: aaaaaggaacaaacatacggtgaaggaagcggcgagaagat TAGGGCGAATTGGAGCTC
TGGT1_289070	pCas9	TAAATGGGGATGTCAAGTT ggaatgctgcgtcaggccct GTTTTAGAGCTAGAAATAGC	Specific sgRNA
(HAP15)	Generic tagging plasmids	L: ctcacacaaacagtcctggagagtctgataatctcatggttt GCTAGCAAGGGCTCGG	Endogenous Tagging fragments
		T: gttccactttgagctcgacctgccgcttccgctcgcctagg TAGGGCGAATTGGAGCTC
TGGT1_252340	pCas9	TAAATGGGGATGTCAAGTT atacctcacttcgagatgcg GTTTTAGAGCTAGAAATAGC	Specific sgRNA
(HAP16)	Generic tagging plasmids	L: tcctcggaacctgcaacctcgtcggctactcttacggtatt GCTAGCAAGGGCTCGG	Endogenous Tagging fragments
		﻿T: aagtcgaagttgctctcctgcaaatgtctgtgtgaccacgc TAGGGCGAATTGGAGCTC
TGGT1_216820	pCas9	TAAATGGGGATGTCAAGTT ggctgaacgacagccgttgt GTTTTAGAGCTAGAAATAGC	Specific sgRNA
(HAP17)	Generic tagging plasmids	L: ctactgcggatagcgataatgaaacacatcggagagtggcg GCTAGCAAGGGCTCGG	Endogenous Tagging fragments
		T: cctgctcagtactgctgccagacacccagcaaagaccaaca TAGGGCGAATTGGAGCTC
TGGT1_311080	pCas9	TAAATGGGGATGTCAAGTT gaggcttgacgctcctgtga GTTTTAGAGCTAGAAATAGC	Specific sgRNA
(HAP18)	Generic tagging plasmids	L: aggtggcttcgtcaagcagcagttcttggcgtcctgtgctc GCTAGCAAGGGCTCGG	Endogenous Tagging fragments
		T: gaggcacagagcgatgcgtctggcgaggcttgacgctcctg TAGGGCGAATTGGAGCTC
TGGT1_238390	pCas9	TAAATGGGGATGTCAAGTT acagagaatctcctctctcg GTTTTAGAGCTAGAAATAGC	Specific sgRNA
(HAP19)	Generic tagging plasmids	L: tgtctatgggctctggccaccttgtcggcgatcgtagcgcg GCTAGCAAGGGCTCGG	Endogenous Tagging fragments
		T: gtcggtcgaggtctttcgctccatcagttctctgtccccga TAGGGCGAATTGGAGCTC
TGGT1_312622	pCas9	TAAATGGGGATGTCAAGTT agtgtctccccttcgcgatg GTTTTAGAGCTAGAAATAGC	Specific sgRNA
(HAP20)	Generic tagging plasmids	L: ctcagcacgcgcagacctctggaaaggcgtcgcatggcctt GCTAGCAAGGGCTCGG	Endogenous Tagging fragments
		﻿T: aacgttctatttcaagtgccaagagagtgtctccccttcgc TAGGGCGAATTGGAGCTC
TGGT1_283730	pCas9	TAAATGGGGATGTCAAGTT agtctgcagtcgctcgcggt GTTTTAGAGCTAGAAATAGC	Specific sgRNA
(HAP21)	Generic tagging plasmids	L: tcctgttcgtgaagtacatttattctcgcatcaagtcggac GCTAGCAAGGGCTCGG	Endogenous Tagging fragments
		T: ccgcgccagaccttcttccgggccaagtctgcagtcgctcg TAGGGCGAATTGGAGCTC
TGGT1_249580	pCas9	TAAATGGGGATGTCAAGTT agattgccgggatcggattt GTTTTAGAGCTAGAAATAGC	Specific sgRNA
(HAP22)	Generic tagging plasmids	L: gagcggtagagtgtagtggagacggcacagcaccagacggc GCTAGCAAGGGCTCGG	Endogenous Tagging fragments
		T: aattttcttgttctctgccctggccttccgggcacccgaaa TAGGGCGAATTGGAGCTC
TGGT1_270200	pCas9	TAAATGGGGATGTCAAGTT attacagaaggccagtgtac GTTTTAGAGCTAGAAATAGC	Specific sgRNA
(HAP23)	Generic tagging plasmids	L: gagcagatgcagatcttatttggggaaagcgtagaaagcag GCTAGCAAGGGCTCGG	Endogenous Tagging fragments
		﻿T: cgtgtgctgctctacacaactgaaacggcggaagtcctgta TAGGGCGAATTGGAGCTC
TGGT1_263690	pCas9	TAAATGGGGATGTCAAGTT acaccactgagttgtgtagt GTTTTAGAGCTAGAAATAGC	Specific sgRNA
(HAP24)	Generic tagging plasmids	L: cgtttatcgacagtgccggacgcgttgctcgcttcatggtt GCTAGCAAGGGCTCGG	Endogenous Tagging fragments
		T: tgtggaaggggcgctcgagtcgagacaccactgagttgtgt TAGGGCGAATTGGAGCTC
TGGT1_261430	pCas9	TAAATGGGGATGTCAAGTT gcactcacacgccagggcgc GTTTTAGAGCTAGAAATAGC	Specific sgRNA
(HAP25)	Generic tagging plasmids	L: tgcaggagtggaacctcgtcgacgatgatttgagcgacgag GCTAGCAAGGGCTCGG	Endogenous Tagging fragments
		﻿T: gctcggtctgcgtttgtttcctcttgcactcacacgccagg TAGGGCGAATTGGAGCTC
TGGT1_223600	pCas9	TAAATGGGGATGTCAAGTT gttcgagcgacgaaaagcaa GTTTTAGAGCTAGAAATAGC	Specific sgRNA
(HAP26)	Generic tagging plasmids	L: gaggcctgcagcagctgtcgatttgggacgtccacacctcc GCTAGCAAGGGCTCGG	Endogenous Tagging fragments
		﻿T: acggtcaaaaggcagtcaacaacgagttcgagcgacgaaaa TAGGGCGAATTGGAGCTC
TGGT1_310140	pCas9	TAAATGGGGATGTCAAGTT gttgaagaggaagcgaacct GTTTTAGAGCTAGAAATAGC	Specific sgRNA
(HAP27)	Generic tagging plasmids	L: aaacgctcaagctgctggcgacctgcgacgaggactctgtg GCTAGCAAGGGCTCGG	Endogenous Tagging fragments
		﻿T: cgagtgagactttgaaacgtttttcccagtctcttccgagg TAGGGCGAATTGGAGCTC
TGGT1_215940	pCas9	TAAATGGGGATGTCAAGTT gatgcgcgcgagacgtgact GTTTTAGAGCTAGAAATAGC	Specific sgRNA
(HAP28)	Generic tagging plasmids	L: gaggcgactccgacggaaccgagctgaagagagtggagaag GCTAGCAAGGGCTCGG	Endogenous Tagging fragments
		T: tttccgcgttgctctcccctttctctcgttttcttcctagt TAGGGCGAATTGGAGCTC
TGGT1_291940	pCas9	TAAATGGGGATGTCAAGTT aagcgtttccagccgccccg GTTTTAGAGCTAGAAATAGC	Specific sgRNA
(HAP29)	Generic tagging plasmids	L: accgtctggctgtccaacacagtaaaggagatgccttgtgt GCTAGCAAGGGCTCGG	Endogenous Tagging fragments
		T: ggtttcgccaagatcaaacaagtttcccactcgacccacgg TAGGGCGAATTGGAGCTC
TGGT1_254580	pCas9	TAAATGGGGATGTCAAGTT acaagaagctggctcgcaga GTTTTAGAGCTAGAAATAGC	Specific sgRNA
(HAP30)	Generic tagging plasmids	L: ccactgctcacggcggtgagaatgccctgaagaagcagtgc GCTAGCAAGGGCTCGG	Endogenous Tagging fragments
		T: cccccacatttaaagaccgggcacacaagaagctggctcgc TAGGGCGAATTGGAGCTC
TGGT1_278660	pCas9	TAAATGGGGATGTCAAGTT atgcgtgcagaaccgactga GTTTTAGAGCTAGAAATAGC	Specific sgRNA
(HAP31)	Generic tagging plasmids	L: agagagcagctctgacttccaaagcgccggcgattatggcc GCTAGCAAGGGCTCGG	Endogenous Tagging fragments
		T: gataagagtcgaaagaaaccccgaatgcgtgcagaaccgac TAGGGCGAATTGGAGCTC
TGGT1_313020	pCas9	TAAATGGGGATGTCAAGTT ggaaggggtgctcacgtcag GTTTTAGAGCTAGAAATAGC	Specific sgRNA
(HAP32)	Generic tagging plasmids	L: gtgacgtcgctgagcaggtcgcgcatgcagacagagacgcg GCTAGCAAGGGCTCGG	Endogenous Tagging fragments
		T: agaacacagaatggaacccttttaggggaaccacccccctg TAGGGCGAATTGGAGCTC
TGGT1_209940	pCas9	TAAATGGGGATGTCAAGTT gctttaacatcagacgagcg GTTTTAGAGCTAGAAATAGC	Specific sgRNA
(HAP33)	Generic tagging plasmids	L: aattgccagcgaaaaactctggctgtaccaagtcttctcta GCTAGCAAGGGCTCGG	Endogenous Tagging fragments
		T: ggcgccagcaaaatcaacactcctcagccagcgagccgcgc TAGGGCGAATTGGAGCTC
TGGT1_208050	pCas9	TAAATGGGGATGTCAAGTT ggtggacaagagacctgggg GTTTTAGAGCTAGAAATAGC	Specific sgRNA
(HAP34)	Generic tagging plasmids	L: aactttatcatgccggcaccacggagggccaagagcgagag GCTAGCAAGGGCTCGG	Endogenous Tagging fragments
		T: gcggatgattgatgacccatttggggtggacaagagacctg TAGGGCGAATTGGAGCTC
TGGT1_230420	pCas9	TAAATGGGGATGTCAAGTT gaagagactgccgagacgcg GTTTTAGAGCTAGAAATAGC	Specific sgRNA
(HAP35)	Generic tagging plasmids	L: tgagcctgtcgcgctcccagtcgcagctgcgcaagctgcag GCTAGCAAGGGCTCGG	Endogenous Tagging fragments
		T: gggaaaaaggaaaactcgacatttcgaggcgccttccacgc TAGGGCGAATTGGAGCTC
TGGT1_304750	pCas9	TAAATGGGGATGTCAAGTT acaggagccgtcaacggctg GTTTTAGAGCTAGAAATAGC	Specific sgRNA
(HAP36)	Generic tagging plasmids	L: gagcagtcgtcactgcaacagtgaaagatgtgaaaaagtct GCTAGCAAGGGCTCGG	Endogenous Tagging fragments
		T: ttgcgaatctcgcaacggcagcatgcgaaaatgaaccccag TAGGGCGAATTGGAGCTC
TGGT1_270220	pCas9	TAAATGGGGATGTCAAGTT gagtctggtagtacgacctg GTTTTAGAGCTAGAAATAGC	Specific sgRNA
(HAP37)	Generic tagging plasmids	L: tcttaggtcccctgttttttggctgttacgttacatggact GCTAGCAAGGGCTCGG	Endogenous Tagging fragments
		﻿T: tagtttgattttaaacagatcaaaaacggcaacctcctcag TAGGGCGAATTGGAGCTC
TGGT1_262610	pCas9	TAAATGGGGATGTCAAGTT gttcgaactaggtacgggta GTTTTAGAGCTAGAAATAGC	Specific sgRNA
(HAP38)	Generic tagging plasmids	L: tgggagctggagcctctccgtttatgcgagctagctatcag GCTAGCAAGGGCTCGG	Endogenous Tagging fragments
		﻿T: acctttcttcttttctacagcgcggagaccttgtcccttac TAGGGCGAATTGGAGCTC
TGGT1_319740	pCas9	TAAATGGGGATGTCAAGTT atggtggtgagacttcgccg GTTTTAGAGCTAGAAATAGC	Specific sgRNA
(HAP39)	Generic tagging plasmids	L: cacaaacatacacctttgaaaaacgagttccagtctgttca GCTAGCAAGGGCTCGG	Endogenous Tagging fragments
		T: cctctgagaaaggcgagttgggtcggtctttccccccacgg TAGGGCGAATTGGAGCTC
TGGT1_316260	pCas9	TAAATGGGGATGTCAAGTT atgcgaggctgctcagtgtc GTTTTAGAGCTAGAAATAGC	Specific sgRNA
(HAP40)	Generic tagging plasmids	L: tccgaaagatgcaagagacgttctgtctaaagagttttgac GCTAGCAAGGGCTCGG	Endogenous Tagging fragments
		T: attgctttctcgacggacccgaagaatggaacatgccagac TAGGGCGAATTGGAGCTC
TGGT1_266750	pCas9	TAAATGGGGATGTCAAGTT agccgacatggagtcctcaa GTTTTAGAGCTAGAAATAGC	Specific sgRNA
(HAP41)	Generic tagging plasmids	L: tgcaggaagatggggaggaaaagaagaaggtggagcggcaa GCTAGCAAGGGCTCGG	Endogenous Tagging fragments
		T: tacaccacacgcgacagaaaatgcagccgacatggagtcct TAGGGCGAATTGGAGCTC
TGGT1_233760	pCas9	TAAATGGGGATGTCAAGTT gaacaccatcagcaggtctg GTTTTAGAGCTAGAAATAGC	Specific sgRNA
(HAP42)	Generic tagging plasmids	L: tccccgcctctctgcaggaagcgcatccgtacactggcatt GCTAGCAAGGGCTCGG	Endogenous Tagging fragments
		T:aagcgagacaccgaggaaagggaaagaacaccatcagcaggTAGGGCGAATTGGAGCTC
TGGT1_307860	pCas9	TAAATGGGGATGTCAAGTT gaggcgggagtggtgcggag GTTTTAGAGCTAGAAATAGC	Specific sgRNA
(HAP43)	Generic tagging plasmids	L: gtatgcactgcttagaagaagtttctcatatctggttccag GCTAGCAAGGGCTCGG	Endogenous Tagging fragments
		T: gttttctatcaaccctatccagtagagtttctcttcccctc TAGGGCGAATTGGAGCTC
TGGT1_281640	pCas9	TAAATGGGGATGTCAAGTT aacgcttctggcaaccttct GTTTTAGAGCTAGAAATAGC	Specific sgRNA
(HAP44)	Generic tagging plasmids	L: cgcctctcacgcagacggagctgcggaaactgctttcgcag GCTAGCAAGGGCTCGG	Endogenous Tagging fragments
		T: ttgcatgtgtatatgcatacatttgaacgcttctggcaacc TAGGGCGAATTGGAGCTC
TGGT1_210380	pCas9	TAAATGGGGATGTCAAGTT agagggtgagcggagtgtat GTTTTAGAGCTAGAAATAGC	Specific sgRNA
(HAP45)	Generic tagging plasmids	L: cagcggaaactccctccagcgttcctcactctcgtaccgag GCTAGCAAGGGCTCGG	Endogenous Tagging fragments
		T: cccgaatccctctctttttcaccgccctcctctctccgata TAGGGCGAATTGGAGCTC
TGGT1_321590	pCas9	TAAATGGGGATGTCAAGTT gcatcgtcactagtcgctca GTTTTAGAGCTAGAAATAGC	Specific sgRNA
(HAP46)	Generic tagging plasmids	L: tttcgtggcaagatgtgttcgaagcagaaaactgttccacg GCTAGCAAGGGCTCGG	Endogenous Tagging fragments
		T: tggcgaacacggacctaaaacacggcatcgtcactagtcgc TAGGGCGAATTGGAGCTC
TGGT1_319550	pCas9	TAAATGGGGATGTCAAGTT ggaggacacaaccccaagaa GTTTTAGAGCTAGAAATAGC	Specific sgRNA
(HAP47)	Generic tagging plasmids	L: tgttcgtcctcttcgcgatctttggcgccgtcctagatctg GCTAGCAAGGGCTCGG	Endogenous Tagging fragments
		T: gcgcggcgcccggaactgcgagagggggaggacacaaccccTAGGGCGAATTGGAGCTC
TGGT1_278960	pCas9	TAAATGGGGATGTCAAGTT gtccgatccagctacgaacc GTTTTAGAGCTAGAAATAGC	Specific sgRNA
(HAP48)	Generic tagging plasmids	L: ctgtgtggccggaacaaagcacagagaagcggaaggcagag GCTAGCAAGGGCTCGG	Endogenous Tagging fragments
		T: gtaaatgcttcttgttggtcttggtgtccgatccagctacg TAGGGCGAATTGGAGCTC
TGGT1_208560	pCas9	TAAATGGGGATGTCAAGTT agacttcctacagctgagcg GTTTTAGAGCTAGAAATAGC	Specific sgRNA
(HAP49)	Generic tagging plasmids	L: ﻿catctcgttctctaactcgcttatttccagagacagataat GCTAGCAAGGGCTCGG	Endogenous Tagging fragments
		T: tatttggtgtcttcgcgcaaaaatgagacttcctacagctg TAGGGCGAATTGGAGCTC
TGGT1_278990	pCas9	TAAATGGGGATGTCAAGTT acagcgaccatcgacaagag GTTTTAGAGCTAGAAATAGC	Specific sgRNA
(HAP50)	Generic tagging plasmids	L: tgggcatgggaacgaccggcggtggctcagcaaagaaataa GCTAGCAAGGGCTCGG	Endogenous Tagging fragments
		T: ttgatgcggcgtgaaacaacagcacacagcgaccatcgaca TAGGGCGAATTGGAGCTC
TGGT1_221320	pCas9	TAAATGGGGATGTCAAGTT gcagagacacacctctccct GTTTTAGAGCTAGAAATAGC	Specific sgRNA
(ACC1)	Generic tagging plasmids	L: aacgcagggaaacgctcgaaagcgctgctacgccagcctgt GCTAGCAAGGGCTCGG	Endogenous Tagging fragments
		T: agtcaatgattccggttcatctctgcgcagagacacacctTAGGGCGAATTGGAGCTC
pL-AID-GFP-HXGPRT	pL-AID-3HA-HXGPRT	F: TAACCCGGGCATATGTAGAAA	Flagment 1
		R: gccagagccggcgcgccca
	GFP containing plasmid	F: gggcgcgccggctctggcatgGTGAGCAAGGGCG	Flagment 2
		R: CTACATATGCCCGGGTTACTTGTACAGCTCGTCCAT
