# Supplementary material for: The Toxoplasma monocarboxylate transporters are involved in the metabolism within the apicoplast and are linked to parasite survival
Source: eLife. 2024 Mar 19;12:RP88866. doi: 10.7554/eLife.88866 (PMC10950331; doi:10.7554/eLife.88866)
Supplement: Supplementary file 2. — (a) Minimally processed mass-spectrometry datasets of the APT1-TurboID fusion line and the parental line. (b) Volcano analysis of mass-spectrometry datasets from APT1-TurboID and the parental line. (c) List of known apicoplast proteins on the volcano plotting. (d) List of transmembrane domain (TMD) proteins identified by APT1-TurboID and ordered from high numbers to low numbers. (e) Merged candidate list from three datasets of hyperLOPIT, ACP-BirA, and APT1-TurboID. (f) Bioinformatic analysis of discovered transmembrane proteins in this study. [file elife-88866-supp2.xlsx]

## Sheet: Supplementary file 2a
Supplementary file 2a. Minimally processed mass spectrometry datasets of the APT1-TurboID fusion line and the parental line
rownames	Product Description	RHku80KO	RHku80KO	RHku80KO	APT1-TurboID intracellular	APT1-TurboID intracellular	APT1-TurboID intracellular	APT1-TurboID extracellular	APT1-TurboID extracellular	APT1-TurboID extracellular
TGME49_221320	acetyl-CoA carboxylase ACC1	138	136	31	129	129	95	104	146	129
TGME49_291180	hypothetical protein	0	0	0	83	95	30	53	96	53
TGME49_297745	hypothetical protein	0	0	0	68	81	43	58	97	57
TGME49_284190	pyruvate carboxylase	47	57	11	52	53	38	36	51	51
TGME49_258970	hypothetical protein	0	1	0	45	51	13	27	50	25
TGME49_208050	ABC transporter, putative	0	0	0	44	43	12	14	22	13
TGME49_214600	hypothetical protein	0	0	0	41	51	7	23	47	21
TGME49_259260	membrane protein FtsH1	0	0	0	41	39	16	27	46	33
TGME49_288940	hypothetical protein	0	0	0	38	37	4	10	49	22
TGME49_262990	hypothetical protein	0	0	0	35	38	11	22	47	29
TGME49_289070	E1-E2 ATPase subfamily protein	0	0	0	32	38	7	12	50	25
TGME49_218560	acetyl-coA carboxylase ACC2	68	6	2	31	38	22	27	47	36
TGME49_289080	HEAT repeat-containing protein	0	0	0	31	30	16	27	39	26
TGME49_205040	PGAP1 family protein	0	0	0	30	31	13	21	46	27
TGME49_230420	sarco/endoplasmic reticulum Ca2+-ATPase	0	0	0	29	33	12	24	40	30
TGME49_203240	hypothetical protein	0	0	0	29	28	12	20	30	27
TGME49_230000	hypothetical protein	0	0	0	28	50	1	29	46	3
TGME49_321620	dynamin-related protein DRPB	0	0	0	28	27	8	14	39	22
TGME49_244380	cactin	0	0	0	26	25	7	17	33	19
TGME49_273760	heat shock protein HSP70	4	0	0	25	30	18	21	29	23
TGME49_300120	aminotransferase, class V superfamily protein	0	0	0	24	28	12	24	32	20
TGME49_232340	protein phosphatase 2C domain-containing protein	0	0	0	22	23	10	16	23	18
TGME49_314970	root hair defective 3 gtp-binding protein (rhd3) protein	0	0	0	21	26	8	14	24	13
TGME49_238040	protein disulfide-isomerase domain-containing protein	0	0	0	20	20	2	11	24	6
TGME49_225310	ARF1-directed GTPase-activating protein, putative	0	0	0	20	20	8	11	21	12
TGME49_262390	TLD protein	0	0	0	19	19	7	12	28	15
TGME49_285500	hypothetical protein	0	0	0	19	20	4	11	16	6
TGME49_311720	chaperonin protein BiP	1	0	0	18	21	6	10	24	17
TGME49_291940	hypothetical protein	0	0	0	18	17	10	13	19	11
TGME49_269190	glyceraldehyde-3-phosphate dehydrogenase GAPDH2	16	0	1	17	19	15	14	32	31
TGME49_296010	phosphatidylinositol 3- and 4-kinase	0	0	0	17	24	6	12	27	13
TGME49_313080	hypothetical protein	0	0	0	17	22	9	15	25	15
TGME49_288600	WD domain, G-beta repeat-containing protein	0	0	0	17	18	7	11	21	14
TGME49_293180	NADP-specific glutamate dehydrogenase	0	0	0	16	19	10	14	20	10
TGME49_275690	ClpB, putative	5	0	0	15	16	12	10	37	35
TGME49_273800	WD domain, G-beta repeat-containing protein	0	0	0	15	33	5	14	32	6
TGME49_290160	sortilin, putative	0	0	0	15	14	6	6	22	10
TGME49_229490	tetratricopeptide repeat-containing protein	0	0	0	15	14	1	6	18	7
TGME49_267510	hypothetical protein	0	0	0	15	14	7	10	13	12
TGME49_209250	hypothetical protein	0	0	0	14	18	2	11	20	7
TGME49_226390	hypothetical protein	0	0	0	14	19	6	10	20	15
TGME49_246982	hypothetical protein	0	0	0	14	15	7	5	17	11
TGME49_212980	hypothetical protein	0	0	0	14	13	1	13	16	5
TGME49_294360	ubiquitin specific protease 39 isoform 2, putative	0	0	0	14	8	6	9	15	10
TGME49_304750	zinc finger, C3HC4 type (RING finger) domain-containing protein	0	0	0	14	13	4	8	14	5
TGME49_313360	hypothetical protein	0	0	0	13	14	4	7	18	7
TGME49_310220	hypothetical protein	0	0	0	13	12	0	1	18	4
TGME49_310080	AMP-binding enzyme domain-containing protein	0	0	0	13	17	0	10	17	5
TGME49_254690	phospholipase/carboxylesterase	0	0	0	13	16	3	7	17	8
TGME49_294220	hypothetical protein	0	0	0	13	11	3	6	16	12
TGME49_286420	elongation factor 1-alpha (EF-1-ALPHA), putative	7	3	3	13	18	6	10	15	10
TGME49_286520	hypothetical protein	0	0	0	13	12	2	4	12	10
TGME49_247195	microneme protein MIC15	0	0	0	12	15	2	9	34	9
TGME49_268340	glycosyltransferase family 28 C-terminal domain-containing protein	0	0	0	12	11	3	7	12	7
TGME49_247760	AMP-binding enzyme domain-containing protein	0	0	0	11	12	1	8	18	6
TGME49_249900	adenine nucleotide translocator, putative	2	3	0	11	8	2	8	11	4
TGME49_205240	cleft lip and palate transmembrane protein 1 (clptm1) protein	0	0	0	11	10	5	7	11	9
TGME49_279360	hypothetical protein	0	0	0	11	10	8	7	10	10
TGME49_246080	NAD dependent epimerase/dehydratase family protein	0	0	0	11	9	2	7	10	3
TGME49_244560	heat shock protein 90, putative	1	0	0	11	8	0	3	10	5
TGME49_294740	hypothetical protein	0	0	0	11	14	0	1	9	1
TGME49_235470	myosin A	0	0	0	11	13	0	2	4	1
TGME49_226960	phosphofructokinase PFKII	0	0	0	10	19	3	8	29	6
TGME49_249390	glutamate/leucine/phenylalanine/valine dehydrogenase family protein	0	0	0	10	19	0	9	20	1
TGME49_256980	glycerol-3-phosphate-acyltransferase	0	0	0	10	11	1	4	18	5
TGME49_289680	Ras-related protein Rab11	0	0	0	10	13	7	11	16	10
TGME49_233500	triose-phosphate isomerase TPI-II	2	0	0	10	10	7	8	15	14
TGME49_305980	pyruvate dehydrogenase complex subunit PDH-E3I	1	0	0	10	11	5	4	14	12
TGME49_288380	heat shock protein HSP90	1	0	0	10	10	0	2	13	5
TGME49_305450	acetyltransferase, GNAT family protein	0	0	0	10	10	5	7	12	7
TGME49_212130	phospholipase, patatin family protein	0	0	0	10	5	0	2	12	7
TGME49_248340	GTP-binding nuclear protein ran/tc4	3	2	0	10	10	3	6	10	9
TGME49_232050	DnaJ domain-containing protein	0	0	0	10	6	3	8	9	5
TGME49_238950	fatty acyl-CoA desaturase, putative	0	0	0	10	8	1	4	6	5
TGME49_245460	ribosomal protein RPS8	0	2	0	10	11	6	7	5	4
TGME49_216810	5'-nucleotidase, C-terminal domain-containing protein	0	0	0	9	10	3	7	19	4
TGME49_278870	myosin F	0	0	0	9	11	0	3	13	3
TGME49_209030	actin ACT1	5	0	1	9	10	5	9	12	4
TGME49_248390	ribosomal protein RPL26	0	0	0	9	8	0	1	5	2
TGME49_231370	phospholipase, patatin family protein	0	0	0	8	9	0	2	28	9
TGME49_295650	hypothetical protein	0	0	0	8	11	1	4	21	5
TGME49_260550	acetyltransferase, GNAT family protein	0	0	0	8	12	3	5	15	4
TGME49_319640	hypothetical protein	0	0	0	8	6	2	5	15	5
TGME49_205130	hypothetical protein	0	0	0	8	13	1	4	13	5
TGME49_203910	TBC domain-containing protein	0	0	0	8	7	0	1	12	1
TGME49_268630	YagE family protein	0	0	0	8	11	4	6	11	7
TGME49_249970	hypothetical protein	0	0	0	8	6	3	4	10	7
TGME49_288720	ribosomal protein RPL10	1	0	0	8	7	2	4	8	3
TGME49_263700	ribosomal protein RPS14	4	1	3	8	6	4	6	6	5
TGME49_269980	preprotein translocase Sec61, putative	0	0	0	8	11	3	5	6	4
TGME49_289690	glyceraldehyde-3-phosphate dehydrogenase GAPDH1	0	0	0	8	7	0	4	2	0
TGME49_203780	hypothetical protein	0	0	0	7	8	0	1	20	4
TGME49_259720	hypothetical protein	0	0	0	7	9	0	6	18	3
TGME49_318460	P-type ATPase of unknown pump specificity (type V) protein	0	0	0	7	7	1	3	17	7
TGME49_270220	hypothetical protein	0	0	0	7	7	1	1	16	7
TGME49_236040	fructose-1,6-bisphosphate aldolase	0	0	0	7	10	0	5	12	7
TGME49_202190	hypothetical protein	0	0	0	7	11	1	3	11	1
TGME49_239100	ribosomal protein RPS7	1	0	0	7	7	0	3	11	5
TGME49_250770	eukaryotic initiation factor-4A, putative	2	2	0	7	8	1	2	10	2
TGME49_217740	3-ketoacyl-(acyl-carrier-protein) reductase	5	1	0	7	9	5	6	9	10
TGME49_240280	S1/P1nuclease	0	0	0	7	8	1	5	9	4
TGME49_249340	hypothetical protein	0	0	0	7	7	2	4	9	7
TGME49_223420	DnaJ domain-containing protein	0	0	0	7	4	2	3	8	8
TGME49_247510	fructose-bisphospatase II	0	0	0	7	6	0	2	8	0
TGME49_292340	zinc finger, C3HC4 type (RING finger) domain-containing protein	0	0	0	7	4	0	0	8	4
TGME49_261500	hydrolase	0	0	0	7	7	7	7	7	5
TGME49_226970	ribosomal protein RPS11	3	1	1	7	5	4	5	7	6
TGME49_261710	ankyrin repeat-containing protein	0	0	0	7	8	3	5	7	2
TGME49_308090	rhoptry protein ROP5	0	0	0	7	5	1	4	7	5
TGME49_321660	mannosyltransferase, putative	0	0	0	7	7	0	1	6	3
TGME49_246340	DnaJ domain-containing protein	0	0	0	7	9	3	6	5	4
TGME49_263320	hypothetical protein	0	0	0	7	10	0	0	0	0
TGME49_206450	autophagy-related cysteine peptidase atg4, putative	0	0	0	6	14	1	6	30	7
TGME49_321640	cell division protein CDC48AP	2	0	0	6	7	1	3	28	15
TGME49_222020	phosphoglycerate kinase PGKII	1	0	0	6	7	5	9	24	16
TGME49_267800	dynamin-related protein DRPA	0	0	0	6	6	0	2	19	9
TGME49_293590	3-oxoacyl-acyl-carrier protein synthase I/II, putative	3	0	1	6	5	7	6	17	16
TGME49_275350	TBC domain-containing protein	0	0	0	6	9	1	5	15	5
TGME49_312110	apicoplast-associated thioredoxin family protein Atrx1	0	0	0	6	6	2	3	14	8
TGME49_290970	8-amino-7-oxononanoate synthase	0	0	0	6	3	0	3	13	5
TGME49_246460	hypothetical protein	0	0	0	6	7	1	2	12	6
TGME49_225990	acyl transferase domain-containing protein	0	0	0	6	6	3	2	12	10
TGME49_257080	3'5'-cyclic nucleotide phosphodiesterase domain-containing protein	0	0	0	6	5	1	2	11	4
TGME49_226600	syntaxin 5, putative	0	0	0	6	7	1	6	10	6
TGME49_311080	transporter, cation channel family protein	0	0	0	6	8	1	2	10	6
TGME49_207440	ribosomal protein RPS4	3	1	1	6	6	1	4	8	2
TGME49_309580	transporter, major facilitator family protein	0	0	0	6	8	4	5	7	7
TGME49_201700	WD domain, G-beta repeat-containing protein	0	0	0	6	7	3	4	7	5
TGME49_305540	hypothetical protein	0	0	0	6	7	1	4	7	2
TGME49_210690	ribosomal protein RPS6	7	0	0	6	7	1	3	7	5
TGME49_281980	phosphatidate cytidylyltransferase	0	0	0	6	8	0	0	7	2
TGME49_257520	synaptobrevin protein	0	0	0	6	7	1	4	6	1
TGME49_289750	ribosomal-ubiquitin protein RPL40	3	1	0	6	5	3	3	6	6
TGME49_239540	LEM3 (ligand-effect modulator 3) family / CDC50 family protein	0	0	0	6	4	2	3	6	0
TGME49_247350	thioredoxin domain-containing protein	0	0	0	6	4	3	2	6	3
TGME49_262620	RNA recognition motif-containing protein	0	0	0	6	6	0	2	5	1
TGME49_245680	ribosomal protein RPL21	0	0	0	6	4	2	2	3	2
TGME49_261570	ribosomal protein RPL7A	1	1	0	6	6	1	2	2	1
TGME49_288650	dense granule protein GRA12	0	0	0	6	2	0	0	2	4
TGME49_320050	ribosomal protein RPL5	0	1	0	6	5	0	2	0	1
TGME49_204060	SNARE domain-containing protein	0	0	0	5	6	0	1	16	9
TGME49_313540	hypothetical protein	0	0	0	5	3	0	0	14	9
TGME49_283850	peptidyl-prolyl cis-trans isomerase	0	0	0	5	10	1	6	13	4
TGME49_255880	hypothetical protein	0	0	0	5	7	3	4	12	9
TGME49_238390	hypothetical protein	0	0	0	5	5	0	1	12	3
TGME49_210380	hypothetical protein	0	0	0	5	8	1	3	11	5
TGME49_232300	ribosomal protein RPS3	3	0	2	5	6	1	5	10	2
TGME49_253430	asparagine synthetase, putative	0	0	0	5	8	0	5	10	1
TGME49_226580	hypothetical protein	0	0	0	5	8	0	3	10	6
TGME49_299110	cleft lip and palate transmembrane protein 1 (clptm1) protein	0	0	0	5	6	0	2	10	2
TGME49_203390	CRAL/TRIO domain-containing protein	0	0	0	5	7	0	6	9	4
TGME49_313670	adaptin n terminal region domain-containing protein	1	0	0	5	7	0	3	9	2
TGME49_263040	ribosomal protein RPS16	2	0	0	5	5	0	3	8	6
TGME49_215420	SNARE protein	0	0	0	5	7	2	5	7	4
TGME49_248880	GTPase RAB7	1	1	0	5	5	2	4	7	2
TGME49_233680	nuclear movement family protein	0	0	0	5	7	1	4	7	4
TGME49_318570	SFT2 family protein	0	0	0	5	5	3	3	7	5
TGME49_235660	hypothetical protein	0	0	0	5	9	1	2	7	2
TGME49_206320	hypothetical protein	0	0	0	5	4	0	2	7	2
TGME49_233220	hypothetical protein	0	0	0	5	4	0	1	7	3
TGME49_305520	ribosomal protein RPS2	0	0	0	5	5	0	0	7	2
TGME49_261070	apicoplast triosephosphate translocator APT1	0	0	0	5	6	4	4	6	5
TGME49_237150	minor histocompatibility antigen h13, putative	0	0	0	5	5	2	3	6	2
TGME49_246220	hypothetical protein	0	0	0	5	5	0	1	6	0
TGME49_215460	ribosomal protein RPS24	4	0	0	5	5	1	3	5	3
TGME49_280610	signal recognition particle receptor alpha subunit	0	0	0	5	5	0	1	5	3
TGME49_258180	hypothetical protein	0	0	0	5	3	0	1	5	2
TGME49_288030	hypothetical protein	0	0	0	5	4	2	3	4	4
TGME49_263050	ribosomal protein RPL13	3	0	1	5	4	0	3	4	2
TGME49_280740	signal peptidase	1	0	0	5	4	1	1	4	1
TGME49_312090	ribosomal protein RPL23	1	2	1	5	5	1	3	3	3
TGME49_300100	rhoptry neck protein RON2	0	0	0	5	5	0	0	2	0
TGME49_249250	ribosomal protein RPL35A	0	0	0	5	5	0	2	0	0
TGME49_309370	adaptin n terminal region domain-containing protein	0	0	0	4	5	0	0	24	11
TGME49_299080	VTC domain-containing protein	0	0	0	4	1	0	0	19	12
TGME49_310190	PIK3R4 kinase-related protein (incomplete catalytic triad)	0	0	0	4	10	0	0	17	0
TGME49_318710	ATP-binding cassette sub-family F member 1	0	0	0	4	7	0	3	14	4
TGME49_231640	alveolin domain containing intermediate filament IMC1	0	0	0	4	6	0	3	14	8
TGME49_208560	carrier superfamily protein	0	0	0	4	5	1	3	12	8
TGME49_266960	beta tubulin	1	0	0	4	7	1	2	11	3
TGME49_221620	beta-tubulin, putative	1	0	0	3	6	0	2	8	3
TGME49_214180	ENTH domain-containing protein	0	0	0	4	5	0	1	11	6
TGME49_256840	hypothetical protein	0	0	0	4	2	1	1	11	8
TGME49_201270	hypothetical protein	0	0	0	4	5	1	1	11	10
TGME49_309120	ribosomal protein RPL4	3	0	1	4	5	0	0	11	6
TGME49_209450	TLD protein	0	0	0	4	5	0	2	9	1
TGME49_267590	hypothetical protein	0	0	0	4	5	0	0	9	2
TGME49_310270	hypothetical protein	0	0	0	4	3	0	0	8	1
TGME49_231630	alveolin domain containing intermediate filament IMC4	0	0	0	4	5	2	4	7	3
TGME49_240440	hypothetical protein	0	0	0	4	4	1	4	7	4
TGME49_310250	hypothetical protein	0	0	0	4	9	2	3	6	5
TGME49_262660	hypothetical protein	0	0	0	4	6	2	3	6	3
TGME49_254580	UDP-galactose transporter family protein	0	0	0	4	4	2	3	6	2
TGME49_204020	ribosomal protein RPL8	7	0	0	4	4	1	3	6	6
TGME49_312660	hypothetical protein	0	0	0	4	5	0	2	6	2
TGME49_267810	Rab 5	0	0	0	4	2	0	2	6	2
TGME49_216680	ankyrin repeat-containing protein	0	0	0	4	5	0	1	6	1
TGME49_260630	DnaJ family Sec63 protein	0	0	0	4	4	0	1	6	2
TGME49_297245	transporter, major facilitator family protein	0	0	0	4	4	2	4	5	3
TGME49_288800	endonuclease/exonuclease/phosphatase family protein	0	0	0	4	6	0	1	5	0
TGME49_261430	hypothetical protein	0	0	0	4	4	0	0	5	2
TGME49_201680	eukaryotic initiation factor-3 subunit 10, putative	0	0	0	4	4	0	0	5	0
TGME49_205030	hypothetical protein	0	0	0	4	3	1	1	4	3
TGME49_272290	pyruvate dehydrogenase complex subunit PD-HE1Beta	0	0	0	4	3	0	1	4	3
TGME49_321590	hypothetical protein	0	0	0	4	3	2	2	3	2
TGME49_218730	hypothetical protein	0	0	0	4	2	2	2	3	0
TGME49_246610	hypothetical protein	0	0	0	4	5	0	2	3	1
TGME49_275568	GPI transamidase subunit PIG-U protein	0	0	0	4	4	0	1	3	0
TGME49_226250	DEAD (Asp-Glu-Ala-Asp) box polypeptide DDX3X	0	0	0	4	2	0	0	3	0
TGME49_263300	eukaryotic porin protein	0	0	0	4	3	1	1	3	0
TGME49_305160	histone H2Ba	2	1	0	4	6	2	2	3	3
TGME49_236640	zinc finger, C3HC4 type (RING finger) domain-containing protein	0	0	0	4	4	0	0	3	1
TGME49_243410	tetratricopeptide repeat-containing protein	0	0	0	4	7	0	2	2	2
TGME49_255260	apical membrane antigen AMA1	0	0	0	4	3	0	0	2	1
TGME49_292130	ribosomal protein RPL13A	0	0	0	4	5	1	3	1	1
TGME49_310750	emp24/gp25L/p24 family protein	0	0	0	4	5	0	0	0	0
TGME49_238250	ribosomal protein RPL36	0	0	0	4	4	0	0	0	0
TGME49_214770	small GTP binding protein rab1a, putative	1	0	0	4	3	1	3	2	0
TGME49_253900	parasite porphobilinogen synthase PBGS	5	0	0	3	5	3	3	17	17
TGME49_205470	translation elongation factor 2 family protein, putative	0	0	0	3	4	1	3	11	1
TGME49_273960	chaperonin GroS protein	2	0	0	3	4	4	2	10	9
TGME49_205380	fructose-bisphospatase I	0	0	0	3	5	0	3	9	1
TGME49_205740	hypothetical protein	0	0	0	3	7	0	1	8	0
TGME49_304710	eukaryotic peptide chain release factor, putative	0	0	0	3	5	0	2	7	3
TGME49_313640	hypothetical protein	2	0	0	3	3	1	2	7	6
TGME49_232710	ribosomal protein RPS3A	2	0	0	3	4	0	1	7	3
TGME49_242660	vacuolar sorting protein 35, putative	0	0	0	3	3	1	1	6	1
TGME49_269480	adaptor complexes medium subunit family protein	0	0	0	3	5	0	1	6	4
TGME49_243800	long-chain fatty acid CoA ligase, putative	0	0	0	3	2	0	0	6	0
TGME49_226020	transporter, major facilitator family protein	0	0	0	3	1	0	2	5	1
TGME49_233540	transporter, major facilitator family protein	0	0	0	3	3	0	1	5	2
TGME49_262610	hypothetical protein	0	0	0	3	3	0	1	5	2
TGME49_213910	hypothetical protein	0	0	0	3	3	0	1	5	0
TGME49_278660	P-type ATPase4, putative	0	0	0	3	2	0	0	5	1
TGME49_319550	membrane protein C17G8.08c, putative	0	0	0	3	4	0	4	4	2
TGME49_230590	chitobiosyldiphosphodolichol beta-mannosyltransferase	0	0	0	3	3	0	1	4	3
TGME49_315210	rhoptry protein, putative	0	0	0	3	3	1	1	4	1
TGME49_315940	rhoptry protein, putative	0	0	0	0	0	0	0	1	0
TGME49_267100	protein phosphatase 2C domain-containing protein	0	0	0	3	4	0	1	4	2
TGME49_289970	hypothetical protein	0	0	0	3	4	1	1	4	2
TGME49_286190	hypothetical protein	0	0	0	3	4	0	1	4	2
TGME49_269390	CRAL/TRIO domain-containing protein	0	0	0	3	3	0	0	4	1
TGME49_318160	MSP (Major sperm protein) domain-containing protein	0	0	0	3	4	0	0	4	1
TGME49_269340	hypothetical protein	0	0	0	3	3	0	0	4	0
TGME49_269600	biotin-requiring enzyme domain-containing protein	7	0	0	3	1	0	0	4	1
TGME49_227360	ribosomal protein RPL3	0	0	0	3	4	0	1	3	1
TGME49_229930	p25-alpha family protein	0	0	0	3	2	0	1	3	1
TGME49_209600	hypothetical protein	0	0	0	3	6	0	0	3	2
TGME49_268720	Hrf1 family protein	0	0	0	3	3	0	0	3	1
TGME49_233470	hypothetical protein	2	0	0	3	2	0	0	3	2
TGME49_236650	DEAD (Asp-Glu-Ala-Asp) box polypeptide 17	0	0	0	3	2	0	0	3	2
TGME49_270530	ubiquitin fusion degradation protein UFD1CY	0	0	0	3	3	2	5	3	3
TGME49_226430	reticulon protein	0	0	0	3	1	0	1	3	2
TGME49_265070	hypothetical protein	0	0	0	3	3	0	0	3	0
TGME49_286580	hypothetical protein	0	0	0	3	0	0	0	2	2
TGME49_228470	ribosomal protein RPL15	0	0	0	3	2	0	2	2	1
TGME49_218520	microneme protein MIC6	0	0	0	3	2	0	1	2	2
TGME49_238050	nuclease and tudor domain-containing protein	0	0	0	3	2	0	0	1	0
TGME49_205100	hypothetical protein	0	0	0	3	3	0	1	0	0
TGME49_268430	hypothetical protein	0	0	0	3	8	2	5	15	4
TGME49_244840	zinc knuckle domain-containing protein	0	0	0	3	3	1	0	5	0
TGME49_276140	ADP ribosylation factor ARF1	1	0	0	3	2	1	1	4	2
TGME49_229670	ribosomal protein RPS23	2	1	0	3	3	0	2	3	1
TGME49_225080	ribosomal protein RPS18	1	0	1	3	3	0	3	3	2
TGME49_224850	polyadenylate binding protein, putative	0	0	0	3	5	0	1	2	0
TGME49_300380	endoplasmic reticulum oxidoreductin, putative	0	0	0	3	2	0	1	2	1
TGME49_313010	DEAD (Asp-Glu-Ala-Asp) box polypeptide DDX6	0	0	0	3	2	0	0	2	0
TGME49_244320	ribosomal protein RPL24	1	1	0	3	3	1	1	1	1
TGME49_253880	GNS1/SUR4 family protein	0	0	0	3	6	2	2	10	5
TGME49_236930	hypothetical protein	0	0	0	3	8	0	0	9	0
TGME49_232250	catalase	0	0	0	3	8	0	2	8	1
TGME49_266760	isocitrate dehydrogenase	2	0	0	3	6	1	1	8	6
TGME49_304990	guanylate-binding protein, N-terminal domain-containing protein	0	0	0	3	2	0	0	4	1
TGME49_250870	DHHC zinc finger domain-containing protein	0	0	0	3	1	0	1	1	1
TGME49_285980	glucosephosphate-mutase GPM1	0	0	0	3	2	0	1	7	0
TGME49_301440	calcium-dependent protein kinase CDPK1	0	0	0	3	5	1	1	4	1
TGME49_254370	guanylyl cyclase	0	0	0	3	3	0	0	4	2
TGME49_293730	DHHC zinc finger domain-containing protein	0	0	0	3	2	1	0	4	1
TGME49_254120	autophagy-related protein 8 atg8, putative	0	0	0	3	5	0	1	5	1
TGME49_244550	hypothetical protein	0	0	0	3	2	0	0	3	1
TGME49_232550	hypothetical protein	0	0	0	3	3	0	1	2	1
TGME49_310150	AMP-binding enzyme domain-containing protein	0	0	0	3	2	0	0	3	0
TGME49_320690	gamma-soluble NSF attachment protein, putative	0	0	0	2	5	0	0	6	0
TGME49_253650	DnaJ C terminal region domain-containing protein	0	0	0	2	2	1	1	16	11
TGME49_277910	thrombospondin type 1 domain-containing protein	0	0	0	2	5	0	0	7	3
TGME49_248100	synaptobrevin protein	0	0	0	2	1	0	0	4	1
TGME49_300000	ribosomal protein RPL18	2	0	0	2	3	0	0	3	2
TGME49_212210	hypothetical protein	0	0	0	2	3	1	2	4	3
TGME49_240510	hypothetical protein	0	0	0	2	7	0	0	13	3
TGME49_271888	3-ketoacyl-CoA reductase, putative	0	0	0	2	3	0	0	7	0
TGME49_239330	ribosomal protein RPL37	0	0	0	2	1	0	0	0	0
TGME49_238170	hypothetical protein	0	0	0	2	1	0	0	19	10
TGME49_210270	hypothetical protein	0	0	0	2	2	0	0	16	1
TGME49_252340	hypothetical protein	0	0	0	2	6	0	0	8	1
TGME49_306030	glutathione s-transferase, n-terminal domain containing protein	0	0	0	2	1	0	0	4	3
TGME49_207060	ribonucleoside-diphosphate reductase small subunit	0	0	0	2	3	0	1	2	0
TGME49_262670	ribosomal protein RPL18A	0	0	0	2	2	0	1	1	1
TGME49_291960	rhoptry kinase family protein ROP40 (incomplete catalytic triad)	0	0	0	2	1	0	0	0	0
TGME49_209420	hypothetical protein	0	0	0	2	3	2	2	2	2
TGME49_267530	hypothetical protein	0	0	0	2	1	0	1	5	2
TGME49_253000	ELMO/CED-12 family protein	0	0	0	2	2	0	0	4	0
TGME49_223050	ribosomal protein RPS20	3	1	0	2	3	1	2	4	2
TGME49_258580	rhoptry protein ROP17	0	0	0	2	5	0	1	5	3
TGME49_243950	prohibitin, putative	1	0	0	2	0	0	1	3	0
TGME49_241160	hemolysin-III related subfamily protein	0	0	0	2	3	0	0	2	1
TGME49_227600	ribosomal protein RPL34	1	0	0	2	2	0	0	1	0
TGME49_313390	ribosomal protein RPL6	1	0	0	2	2	0	0	2	1
TGME49_262560	hypothetical protein	1	0	0	2	3	1	2	5	3
TGME49_320020	transporter, major facilitator family protein	0	0	0	2	1	0	0	1	2
TGME49_229650	josephin protein	0	0	0	2	2	0	3	7	1
TGME49_267430	DnaJ domain-containing protein	0	0	0	2	2	0	1	2	0
TGME49_215785	rhoptry protein ROP2A	0	0	0	2	2	0	0	2	1
TGME49_310802	CRAL/TRIO domain-containing protein	0	0	0	2	2	0	0	4	0
TGME49_300140	elongation factor 1-gamma, putative	0	0	0	2	0	0	0	2	1
TGME49_258730	hypothetical protein	0	0	0	2	2	1	1	1	2
TGME49_270510	asparaginyl-tRNA synthetase (NOB+tRNA synthase)	1	0	0	2	3	0	2	10	3
TGME49_245670	pyruvate dehydrogenase complex subunit PDH-E1Alpha	1	0	0	2	2	0	0	10	6
TGME49_311400	WD domain, G-beta repeat-containing protein	0	0	0	2	3	0	2	13	2
TGME49_227420	4-hydroxy-3-methylbut-2-enyl diphosphate reductase	0	0	0	2	2	1	1	11	9
TGME49_287270	hypothetical protein	1	0	0	2	1	0	1	11	10
TGME49_290670	leucyl aminopeptidase LAP	0	0	0	2	2	0	0	10	3
TGME49_220860	DEAD/DEAH box helicase	0	0	0	2	4	0	1	9	0
TGME49_242070	cAMP-dependent protein kinase regulatory subunit	0	0	0	2	5	0	0	8	3
TGME49_216620	EF hand domain-containing protein	0	0	0	2	2	0	0	8	1
TGME49_232620	hypothetical protein	0	0	0	2	0	0	0	8	1
TGME49_233460	SAG-related sequence SRS29B	0	0	2	2	3	0	2	7	7
TGME49_293430	hypothetical protein	0	0	0	2	3	0	1	7	0
TGME49_264080	acyl carrier protein ACP	2	0	0	2	1	2	2	6	5
TGME49_273540	phosphatidylserine synthase, putative	0	0	0	2	5	1	2	5	2
TGME49_273070	GTPase activating protein for adp ribosylation factor, putative	0	0	0	2	2	1	1	5	1
TGME49_216540	dolichyl-phosphate beta-glucosyltransferase	0	0	0	2	3	0	0	5	0
TGME49_216020	peptidase family c78 protein	0	0	0	2	3	0	0	5	2
TGME49_250790	hypothetical protein	0	0	0	2	2	0	0	5	2
TGME49_319740	transporter, major facilitator family protein	0	0	0	2	4	0	1	4	2
TGME49_201780	microneme protein MIC2	0	0	0	2	3	0	1	4	1
TGME49_295080	hypothetical protein	0	0	0	2	2	0	1	3	1
TGME49_229030	hypothetical protein	0	0	0	2	0	0	1	3	0
TGME49_203310	dense granule protein GRA7	0	0	0	2	2	0	0	3	2
TGME49_243390	hypothetical protein	0	0	0	2	2	0	0	2	2
TGME49_249300	hypothetical protein	0	0	0	2	1	0	0	2	1
TGME49_267400	ribosomal protein RPL32	1	0	0	2	2	0	2	2	1
TGME49_225500	hypothetical protein	0	0	0	2	0	0	0	2	1
TGME49_240860	acyltransferase domain-containing protein	0	0	0	2	2	0	1	2	0
TGME49_309560	nmda receptor glutamate-binding chain	0	0	0	2	3	2	2	2	3
TGME49_239260	histone H4	0	0	0	2	2	1	1	2	2
TGME49_232230	ribosomal protein RPL30	0	0	0	2	2	0	0	2	2
TGME49_238010	ribosomal protein RPL23A	1	0	0	2	2	0	0	2	1
TGME49_284560	ribosomal protein RPL9	0	0	0	2	2	0	2	2	2
TGME49_314810	ribosomal protein RPL7	0	0	0	2	3	0	0	1	1
TGME49_269150	DHHC zinc finger domain-containing protein	0	0	0	2	2	0	0	1	1
TGME49_223910	acyltransferase domain-containing protein	0	0	0	2	1	0	0	1	0
TGME49_216820	transporter, major facilitator family protein	0	0	0	2	1	0	1	1	1
TGME49_276940	ribosome associated membrane protein RAMP4, putative	0	0	0	2	1	0	1	0	0
TGME49_201840	aspartyl protease ASP1	0	0	0	2	1	0	0	0	0
TGME49_223800	hypothetical protein	0	0	0	2	2	0	0	2	0
TGME49_286630	redoxin domain-containing protein	0	0	0	2	3	0	0	8	6
TGME49_233530	hypothetical protein	0	0	0	2	0	0	0	2	1
TGME49_313310	DnaJ domain-containing protein	0	0	0	2	2	0	2	7	5
TGME49_237210	Tyrosine kinase-like (TKL) protein	0	0	0	2	3	0	2	9	1
TGME49_291300	RER1 protein, putative	0	0	0	2	2	0	1	3	0
TGME49_312050	small GTPase Rab2, putative	0	0	0	2	1	0	0	3	0
TGME49_249310	hypothetical protein	0	0	0	2	1	0	1	2	2
TGME49_227620	dense granule protein GRA2	0	0	0	2	2	0	0	0	0
TGME49_255980	hypothetical protein	0	0	0	2	1	0	0	2	0
TGME49_222960	SCY kinase-related protein (incomplete catalytic triad)	0	0	0	2	1	0	0	3	0
TGME49_231000	START domain-containing protein	0	0	0	2	2	0	0	3	0
TGME49_220270	alveolin domain containing intermediate filament IMC6	0	0	0	2	5	0	1	3	2
TGME49_251780	heat shock protein	5	0	0	2	3	2	2	22	3
TGME49_213392	surface antigen repeat-containing protein	0	0	0	2	3	0	1	11	3
TGME49_289360	hypothetical protein	0	0	0	2	1	1	0	10	5
TGME49_258826	hypothetical protein	0	0	0	2	2	0	0	7	4
TGME49_310490	ribosomal protein RPL27A	5	0	1	2	3	1	1	6	5
TGME49_268200	RNA recognition motif-containing protein	0	0	0	2	4	0	2	3	1
TGME49_232180	UBA/TS-N domain-containing protein	0	0	0	2	2	0	0	3	0
TGME49_213790	hypothetical protein	0	0	0	2	2	0	0	3	0
TGME49_217570	ribosomal protein RPS27	1	0	0	2	2	0	1	2	1
TGME49_262960	U1 snRNP-associated protein Usp106, putative	0	0	0	2	1	0	0	1	2
TGME49_312622	DUF803 domain-containing protein	0	0	0	2	2	0	0	4	2
TGME49_313100	signal recognition particle SRP54 protein	0	0	0	2	6	0	0	6	0
TGME49_243570	ribosomal protein RPS26	3	0	0	2	2	1	2	3	3
TGME49_230610	transmembrane protein TMEM222	0	0	0	2	1	0	0	1	0
TGME49_294250	WD domain, G-beta repeat-containing protein	0	0	0	2	0	0	0	2	0
TGME49_221480	hypothetical protein	0	0	0	2	0	0	0	0	0
TGME49_257340	Ras family protein	0	0	0	2	1	0	0	1	0
TGME49_232350	lactate dehydrogenase LDH1	0	0	0	1	6	0	0	3	1
TGME49_230410	peroxiredoxin PRX3	3	0	0	1	5	0	3	11	5
TGME49_273460	eukaryotic translation initiation factor 3 subunit 6 interacting protein	0	0	0	1	2	0	0	2	0
TGME49_316260	hypothetical protein	0	0	0	1	2	0	0	3	2
TGME49_266060	ribosomal protein RPSA	0	0	0	1	3	0	0	3	1
TGME49_215060	small GTP-binding protein sar1, putative	0	0	0	1	2	1	1	1	1
TGME49_224620	hypothetical protein	0	0	0	1	3	1	2	3	1
TGME49_236110	autophagy-related protein 3 atg3, putative	0	0	0	1	3	0	1	5	1
TGME49_277000	transport protein Sec24, putative	0	0	0	1	2	0	0	3	0
TGME49_204400	ATPase synthase subunit alpha, putative	3	0	0	1	1	1	1	7	1
TGME49_230690	LNS2 (Lipin/Ned1/Smp2) protein	0	0	0	1	4	0	1	9	1
TGME49_235160	hypothetical protein	0	0	0	1	4	0	0	16	1
TGME49_316400	alpha tubulin TUBA1	0	0	1	1	2	1	0	7	5
TGME49_205320	hypothetical protein	0	0	0	1	4	0	1	5	0
TGME49_290660	RNA recognition motif-containing protein	0	0	0	1	1	0	0	2	0
TGME49_278990	phosphate carrier, putative	0	0	0	1	2	0	0	2	0
TGME49_295110	rhoptry protein ROP7	0	1	0	1	4	0	0	1	2
TGME49_295125	rhoptry protein ROP4	0	0	0	0	2	0	0	0	2
TGME49_230400	hypothetical protein	0	0	0	1	4	1	2	17	3
TGME49_217460	glutaminyl-tRNA synthetase (GlnRS)	0	0	0	1	2	0	0	0	0
TGME49_289530	ribosomal protein RPL19	2	0	1	1	1	0	1	2	1
TGME49_231890	beta-ketoacyl-acyl carrier protein synthase III, putative	0	0	0	1	0	1	0	10	8
TGME49_233720	DNA-directed RNA polymerase II RPBABC8	0	0	0	1	3	0	1	3	0
TGME49_203630	ribosomal protein RPL44	1	0	0	1	2	0	0	0	0
TGME49_266640	Acetyl-coenzyme A synthetase 2, putative	0	0	0	1	5	0	1	8	1
TGME49_300060	signal peptidase subunit protein	0	0	0	1	2	0	1	2	2
TGME49_214440	4'-phosphopantetheinyl transferase superfamily protein	0	0	0	1	2	0	1	1	0
TGME49_205250	rhoptry protein ROP18	0	0	0	1	2	0	0	0	0
TGME49_267050	hydrolase, alpha/beta fold family protein	0	0	0	1	3	0	1	3	1
TGME49_232440	Brf1p family coiled coil protein	0	0	0	1	8	0	2	7	2
TGME49_309590	rhoptry protein ROP1	1	1	1	1	2	1	2	1	1
TGME49_205700	cyclophilin precursor	0	0	0	1	1	0	0	4	3
TGME49_289650	PEP-carboxykinase I	0	0	0	1	9	0	4	11	1
TGME49_249270	protein disulfide isomerase-related protein (provisional), putative	0	0	0	1	1	0	0	3	1
TGME49_215775	rhoptry protein ROP8	0	0	0	1	2	0	1	2	1
TGME49_279390	proliferation-associated protein 2G4, putative	0	0	0	1	3	0	0	1	0
TGME49_272640	eukaryotic initiation factor-2B, epsilon subunit, putative	0	0	0	1	1	0	0	5	0
TGME49_214920	GPI-anchored wall transfer protein GWT1, putative	0	0	0	1	0	0	0	3	2
TGME49_240600	chaperonin cpn60, putative	0	0	0	1	1	1	1	19	15
TGME49_262430	4-hydroxy-3-methylbut-2-en-1-yl diphosphate synthase	0	0	0	1	0	0	0	17	8
TGME49_262380	elongation factor Tu, putative	3	0	0	1	2	0	0	13	1
TGME49_297940	single-strand binding protein	1	0	0	1	0	2	2	11	10
TGME49_247000	tetratricopeptide repeat-containing protein	0	0	0	1	1	0	1	11	5
TGME49_200280	WD domain, G-beta repeat-containing protein	0	0	0	1	3	0	0	11	6
TGME49_309752	succinate-Coenzyme A ligase, beta subunit, putative	7	0	0	1	2	0	0	10	0
TGME49_223760	hypothetical protein	0	0	0	1	2	0	0	9	0
TGME49_243710	t-complex protein beta subunit	0	0	0	1	7	0	3	8	0
TGME49_231210	sarcalumenin/eps15 family protein	0	0	0	1	4	0	0	7	1
TGME49_217890	alkyl hydroperoxide reductase/ Thiol specific antioxidant/ Mal allergen, putative	0	0	0	1	3	0	0	7	3
TGME49_244910	MIZ/SP-RING zinc finger domain-containing protein	0	0	0	1	3	0	0	7	0
TGME49_272390	hypothetical protein	0	0	0	1	1	0	0	7	4
TGME49_312100	plasma membrane-type Ca(2+)-ATPase A1 PMCAA1	0	0	0	1	1	0	0	7	0
TGME49_226340	hypothetical protein	0	0	0	1	2	0	0	6	1
TGME49_243200	hypothetical protein	0	0	0	1	1	0	0	6	1
TGME49_289820	TBC domain-containing protein	0	0	0	1	1	0	0	6	0
TGME49_216650	S15 sporozoite-expressed protein	0	0	0	1	4	0	1	5	1
TGME49_253440	cell-cycle-associated protein kinase SRPK, putative	0	0	0	1	3	0	0	5	1
TGME49_213350	ribosomal protein RPS15	0	0	0	1	1	0	0	5	0
TGME49_214110	protein yipf5, putative	0	0	0	1	3	0	0	4	0
TGME49_283730	endomembrane protein 70 subfamily protein	0	0	0	1	2	0	0	4	1
TGME49_300290	SNARE domain-containing protein	0	0	0	1	2	0	0	4	1
TGME49_311310	protein phosphatase 2B catalytic subunit, calcineurin family phosphatse superfamily protein	0	0	0	1	2	0	0	4	0
TGME49_280400	hypothetical protein	0	0	0	1	2	0	0	4	0
TGME49_203970	dolichyl-diphosphooligosaccharide--protein glycosyltransferase	0	0	0	1	1	0	0	4	1
TGME49_313020	STAS domain-containing protein	0	0	0	1	1	0	0	4	0
TGME49_264870	Sodium:neurotransmitter symporter family protein	0	0	0	1	1	0	0	4	0
TGME49_223600	hypothetical protein	0	0	0	1	2	0	1	3	0
TGME49_206590	calcium-dependent protein kinase CDPK2A	0	0	0	1	2	0	0	3	0
TGME49_264900	hypothetical protein	0	0	0	1	1	0	0	3	0
TGME49_214970	DNA replication licensing factor, putative	0	0	0	1	1	0	0	3	0
TGME49_223620	golgi SNARE, putative	0	0	0	1	0	0	0	3	0
TGME49_226710	hypothetical protein	0	0	0	1	1	0	0	3	0
TGME49_290980	glycine C-acetyltransferase, putative	0	0	0	1	1	0	0	3	1
TGME49_224060	thioredoxin, putative	0	0	0	1	0	0	0	2	0
TGME49_207710	phosphatidylinositol synthase, putative	0	0	0	1	1	0	0	2	0
TGME49_313230	eukaryotic initiation factor-2, alpha subunit	0	0	0	1	2	0	0	2	1
TGME49_236620	protein kinase (incomplete catalytic triad)	0	0	0	1	1	0	0	2	0
TGME49_266750	transporter/permease protein, putative	0	0	0	1	1	0	0	2	0
TGME49_209940	transporter/permease protein	0	0	0	1	1	0	1	2	1
TGME49_264090	hypothetical protein	0	0	0	1	3	0	0	2	0
TGME49_239820	D-3-phosphoglycerate dehydrogenase	0	0	0	1	1	0	0	2	0
TGME49_310140	hypothetical protein	0	0	0	1	0	0	0	2	0
TGME49_264440	signal recognition particle receptor beta subunit protein	0	0	0	1	0	0	0	2	0
TGME49_230510	hypothetical protein	0	0	0	1	1	0	0	2	0
TGME49_221180	hypothetical protein	0	0	0	1	0	0	0	2	0
TGME49_233760	hypothetical protein	0	0	0	1	1	0	1	2	1
TGME49_249580	hypothetical protein	0	0	0	1	2	0	0	2	0
TGME49_239870	CBS domain-containing protein	0	0	0	1	3	0	1	2	0
TGME49_244110	nucleosome assembly protein (nap) protein	0	0	0	1	2	0	2	1	0
TGME49_223140	tRNA binding domain-containing protein	0	0	0	1	2	0	0	0	0
TGME49_278630	tetratricopeptide repeat-containing protein	0	0	0	1	2	0	0	8	0
TGME49_274130	TBC domain-containing protein	0	0	0	1	1	0	0	10	0
TGME49_309210	peroxiredoxin 6, putative	0	0	0	1	2	0	1	4	0
TGME49_310950	AP2 domain transcription factor AP2XI-3	0	0	0	1	1	0	0	3	1
TGME49_278960	hypothetical protein	0	0	0	1	1	0	0	5	0
TGME49_219720	Ras-related protein Rab-5C, putative	0	0	0	1	1	0	1	3	0
TGME49_239760	ribosomal protein RPL22	1	0	0	1	2	0	0	2	2
TGME49_246600	ABC1 family protein	0	0	0	1	1	0	0	10	3
TGME49_216860	DEAD (Asp-Glu-Ala-Asp) box polypeptide DDX39	0	0	0	1	1	0	0	3	1
TGME49_320740	hypothetical protein	0	0	0	1	3	0	0	3	0
TGME49_226400	lipoic acid synthase LIPA	1	0	0	1	0	0	0	11	8
TGME49_321570	beta-hydroxyacyl-acyl carrier protein dehydratase (FABZ)	0	0	0	1	2	0	1	6	6
TGME49_313790	hypothetical protein	0	0	0	1	1	0	0	6	0
TGME49_309820	ribosomal protein RPL11	2	1	0	1	1	0	2	3	1
TGME49_207070	glycosyl transferase, putative	0	0	0	1	1	0	0	3	1
TGME49_266070	ribosomal protein RPL31	0	0	0	1	2	0	1	2	1
TGME49_291850	ribosomal protein RPS30	3	1	0	1	1	0	0	0	1
TGME49_240650	coatomer protein complex, subunit alpha, putative	0	0	0	1	4	0	0	10	1
TGME49_229440	zinc finger, C3HC4 type (RING finger) domain-containing protein	0	0	0	1	2	0	0	1	0
TGME49_287500	T complex chaperonin, putative	0	0	0	1	2	0	0	1	0
TGME49_227030	hypothetical protein	0	0	0	1	1	0	0	2	0
TGME49_305140	phospholipase, patatin family protein	0	0	0	1	1	0	0	2	0
TGME49_312380	tetratricopeptide repeat-containing protein	0	0	0	1	0	0	0	3	0
TGME49_256920	phosphatidylinositol-4-phosphate 5-Kinase	0	0	0	1	4	0	0	3	0
TGME49_267080	26S protease regulatory subunit 4, putative	0	0	0	1	0	0	0	2	0
TGME49_261250	histone H2A1	2	1	0	0	3	1	0	2	2
TGME49_261580	histone H2AX	1	0	0	0	1	0	0	1	1
TGME49_300200	histone H2AZ	1	1	0	0	1	1	0	0	0
TGME49_294630	hypothetical protein	0	0	0	0	0	0	0	6	2
TGME49_258540	phosphoglycerate mutase family protein	0	0	0	0	0	0	0	4	0
TGME49_202690	DNA-directed RNA polymerase II RPB9	0	0	0	0	2	0	0	1	0
TGME49_305850	RNA recognition motif-containing protein	2	0	0	0	2	0	0	3	1
TGME49_205550	AGC kinase	0	0	0	0	3	0	3	7	0
TGME49_309600	hypothetical protein	0	0	0	0	2	0	0	9	2
TGME49_299050	ribosomal protein RPL17	2	0	0	0	1	0	0	2	1
TGME49_212290	ribosomal protein RPS19	0	0	0	0	0	0	0	2	0
TGME49_231140	ribosomal protein RPS25	1	0	1	0	1	0	1	2	0
TGME49_272910	T-complex protein 1 delta subunit	0	0	0	0	6	0	0	8	0
TGME49_287970	hypothetical protein	0	0	0	0	2	0	0	11	0
TGME49_256760	pyruvate kinase PyK1	0	0	0	0	5	0	0	2	0
TGME49_278830	glucose-6-phosphate 1-dehydrogenase	0	0	0	0	10	0	1	12	1
TGME49_313140	isocitrate dehydrogenase	0	0	0	0	1	0	0	2	0
TGME49_307570	glycerol-3-phosphate dehydrogenase (gpdh), putative	0	0	0	0	1	0	0	9	7
TGME49_263090	14-3-3 protein	0	0	0	0	1	0	1	4	4
TGME49_264420	lipoprotein, putative	0	0	0	0	2	0	2	4	0
TGME49_264430	hypothetical protein	0	0	0	0	0	0	0	3	0
TGME49_249550	hypothetical protein	0	0	0	0	2	0	0	4	0
TGME49_253890	peptidase M16 inactive domain-containing protein	0	0	0	0	0	0	0	7	2
TGME49_310430	Hsp90 domain-containing protein	1	0	0	0	1	0	0	20	16
TGME49_210700	hypothetical protein	0	0	0	0	5	0	0	16	0
TGME49_222300	hypothetical protein	0	0	0	0	0	0	0	14	7
TGME49_292920	heat shock protein 75, putative	0	0	0	0	0	0	0	14	0
TGME49_288500	FAD Malate-dehydrogenase (MDH-FAD)	0	0	0	0	2	0	0	13	0
TGME49_213010	hypothetical protein	0	0	0	0	0	0	0	13	10
TGME49_289000	hypothetical protein	0	0	0	0	0	0	0	12	7
TGME49_293250	hypothetical protein	0	0	0	0	0	0	0	0	0
TGME49_230940	hypothetical protein	5	0	0	0	7	0	0	11	5
TGME49_270240	MAG1	0	0	0	0	0	0	0	11	10
TGME49_236210	peptidase M16 family potein, putative	1	0	0	0	0	0	0	11	0
TGME49_299070	pyruvate kinase PyKII	0	0	0	0	0	0	0	11	3
TGME49_215700	phosphatidylinositol 3- and 4-kinase	0	0	0	0	0	0	0	11	0
TGME49_204050	subtilisin SUB1	0	0	0	0	0	1	1	10	3
TGME49_245560	hypothetical protein	0	0	0	0	5	0	0	10	3
TGME49_268950	hypothetical protein	0	0	0	0	3	0	0	10	2
TGME49_258870	hypothetical protein	0	0	0	0	1	0	0	10	7
TGME49_220350	tRNA ligases class II (D, K and N) domain-containing protein	0	0	0	0	0	0	0	10	5
TGME49_215590	flavoprotein subunit of succinate dehydrogenase	1	0	0	0	0	0	0	10	0
TGME49_214750	hypothetical protein	0	0	0	0	0	0	0	10	0
TGME49_314780	myosin G	0	0	0	0	0	0	0	10	0
TGME49_268330	hypothetical protein	0	0	0	0	0	0	0	9	0
TGME49_311230	hypothetical protein	0	0	0	0	1	0	0	8	1
TGME49_215380	hypothetical protein	0	0	0	0	1	0	0	8	2
TGME49_286050	hypothetical protein	0	0	0	0	0	0	0	8	6
TGME49_202680	peptidase M16, alpha subunit, putative	0	0	0	0	0	0	0	8	0
TGME49_221922	NifU family domain-containing protein	0	0	0	0	0	0	0	8	4
TGME49_268890	citrate synthase I	0	0	0	0	0	0	0	8	0
TGME49_267330	fumarate hydratase	0	0	0	0	0	0	0	8	0
TGME49_307860	hypothetical protein	0	0	0	0	2	0	0	7	1
TGME49_224980	hypothetical protein	0	0	0	0	1	0	0	7	0
TGME49_239680	hypothetical protein	0	0	0	0	0	0	0	7	3
TGME49_227610	hypothetical protein	0	0	0	0	0	0	0	7	0
TGME49_295000	hypothetical protein	0	0	0	0	0	0	0	7	0
TGME49_249630	glutathione S-transferase, N-terminal domain-containing protein	0	0	0	0	0	0	0	7	0
TGME49_261950	ATP synthase beta subunit ATP-B	3	0	0	0	0	1	2	6	3
TGME49_216670	FUSE-binding protein 2 / KH-type splicing regulatory protein	0	0	0	0	4	0	0	6	2
TGME49_289330	ubiquitin carboxyl-terminal hydrolase family 2 protein	0	0	0	0	1	0	0	6	0
TGME49_246100	phosducin, putative	0	0	0	0	1	0	0	6	1
TGME49_281640	hypothetical protein	0	0	0	0	1	0	0	6	1
TGME49_255690	2-C-methyl-D-erythritol 2,4-cyclodiphosphate synthase domain-containing protein	0	0	0	0	0	0	0	6	5
TGME49_214620	hypoxia- inducible factor prolyl hydroxylase (phd2), putative	0	0	0	0	0	0	0	6	3
TGME49_247550	heat shock protein HSP60	6	0	1	0	0	0	0	6	5
TGME49_208830	hypothetical protein	0	0	0	0	0	0	0	6	2
TGME49_223125	ubiquitin family protein	0	0	0	0	0	0	0	6	2
TGME49_228130	hypothetical protein	0	0	0	0	0	0	0	6	7
TGME49_270910	acyltransferase domain-containing protein	0	0	0	0	0	0	0	6	4
TGME49_258380	elongation factor p (ef-p) kow family domain-containing protein	0	0	0	0	0	0	0	6	6
TGME49_240430	glyoxalase family protein	0	0	0	0	0	0	0	6	3
TGME49_230340	hypothetical protein	0	0	0	0	0	0	0	6	1
TGME49_251590	hypothetical protein	0	0	0	0	0	0	0	6	2
TGME49_234420	ATPase, AAA family protein	0	0	0	0	0	0	0	6	0
TGME49_297780	ATPase/histidine kinase/DNA gyrase B/HSP90 domain-containing protein	0	0	0	0	0	0	0	6	3
TGME49_301380	elongation factor Tu GTP binding domain-containing protein	0	0	0	0	0	0	0	6	2
TGME49_301120	acetyl-CoA acetyltransferase	0	0	0	0	0	0	0	6	0
TGME49_258090	hypothetical protein	0	0	0	0	0	1	1	5	2
TGME49_222070	elongation factor Tu GTP binding domain-containing protein	0	0	0	0	3	0	0	5	0
TGME49_263070	CMGC kinase, CK2 family	0	0	0	0	2	0	0	5	0
TGME49_228750	calcium dependent protein kinase CDPK7	0	0	0	0	2	0	0	5	0
TGME49_229000	kelch repeat-containing protein	0	0	0	0	2	0	0	5	1
TGME49_214090	signal peptidase	0	0	0	0	2	0	0	5	0
TGME49_267690	hypothetical protein	0	0	0	0	1	0	0	5	3
TGME49_235490	hypothetical protein	0	0	0	0	1	0	0	5	1
TGME49_221522	adaptor complexes medium subunit family protein	0	0	0	0	1	0	0	5	0
TGME49_315270	hypothetical protein	0	0	0	0	1	0	0	5	0
TGME49_256830	SacI domain-containing protein	0	0	0	0	1	0	0	5	0
TGME49_238400	endonuclease/exonuclease/phosphatase domain-containing protein	0	0	0	0	0	0	0	5	0
TGME49_304630	ATG C terminal domain-containing protein	0	0	0	0	0	0	0	5	0
TGME49_269180	MIF4G domain-containing protein	0	0	0	0	0	0	0	5	0
TGME49_246550	aspartyl protease ASP3	0	0	0	0	0	0	0	5	5
TGME49_258640	adenylate kinase superfamily protein	0	0	0	0	0	0	0	5	4
TGME49_214120	hypothetical protein	0	0	0	0	0	0	0	5	0
TGME49_319920	2-oxo acid dehydrogenases acyltransferase (catalytic domain) domain-containing protein	1	0	0	0	0	0	0	5	0
TGME49_264200	hypothetical protein	0	0	0	0	0	0	0	5	2
TGME49_298990	ferredoxin NADP+ oxidoreductase FNR	0	0	0	0	0	0	0	5	1
TGME49_206610	pyruvate dehydrogenase complex subunit PDH-E2	0	0	0	0	0	0	0	5	2
TGME49_216630	trigger factor protein, putative	0	0	0	0	0	0	0	5	2
TGME49_223970	translation elongation and release factors (gtpases), putative	0	0	0	0	0	0	0	5	0
TGME49_227948	peptidase M16 inactive domain-containing protein	0	0	0	0	0	0	0	5	0
TGME49_261850	helicase, putative	0	0	0	0	0	0	0	5	1
TGME49_307610	elongation factor TS, putative	0	0	0	0	0	0	0	5	3
TGME49_314390	hypothetical protein	0	0	0	0	0	0	0	5	0
TGME49_247600	hypothetical protein	0	0	0	0	0	0	0	5	0
TGME49_313270	hypothetical protein	0	0	0	0	0	0	0	5	0
TGME49_224090	enoyl-CoA hydratase/isomerase family protein	0	0	0	0	0	0	0	5	0
TGME49_313240	ethylene-responsive RNA helicase, putative	0	0	0	0	0	0	0	5	0
TGME49_203160	hypothetical protein	0	0	0	0	3	0	0	4	1
TGME49_270200	hypothetical protein	0	0	0	0	3	0	0	4	0
TGME49_294670	translation initiation factor 3 subunit	0	0	0	0	2	0	0	4	0
TGME49_289600	heat shock protein HSP29	0	0	0	0	1	0	0	4	0
TGME49_249860	hypothetical protein	0	0	0	0	1	0	0	4	0
TGME49_211680	protein disulfide isomerase	0	0	0	0	1	0	0	4	5
TGME49_278890	hypothetical protein	0	0	0	0	1	0	0	4	1
TGME49_298610	GYF domain-containing protein	0	0	0	0	1	0	0	4	0
TGME49_280370	hypothetical protein	0	0	0	0	1	0	0	4	0
TGME49_320588	glycosyl hydrolases family 35 protein	0	0	0	0	1	0	0	4	1
TGME49_314100	tetratricopeptide repeat-containing protein	0	0	0	0	1	0	0	4	0
TGME49_294730	hypothetical protein	0	0	0	0	1	0	0	4	1
TGME49_259950	carbonate dehydratase, eukaryotic-type domain-containing protein	0	0	0	0	0	0	0	4	4
TGME49_295990	ubiquitin conjugating enzyme E2, putative	0	0	0	0	0	0	0	4	5
TGME49_213072	Sec1 family protein	0	0	0	0	0	0	0	4	2
TGME49_214850	1-deoxy-D-xylulose 5-phosphate reductoisomerase, putative	0	0	0	0	0	0	0	4	1
TGME49_226730	aconitate hydratase ACN/IRP	0	0	0	0	0	0	0	4	0
TGME49_234280	AMP deaminase	0	0	0	0	0	0	0	4	0
TGME49_236190	hypothetical protein	0	0	0	0	0	0	0	4	2
TGME49_239320	BolA family protein	0	0	0	0	0	0	0	4	2
TGME49_244200	2-oxoglutarate dehydrogenase e1 component, mitochondrial precursor, putative	3	0	0	0	0	0	0	4	0
TGME49_222140	DEAD/DEAH box helicase domain-containing protein	0	0	0	0	0	0	0	4	1
TGME49_244700	NAD(+)/NADH kinase domain-containing protein	0	0	0	0	0	0	0	4	2
TGME49_257170	hypothetical protein	0	0	0	0	0	0	0	4	2
TGME49_264760	Oxysterol-binding protein	0	0	0	0	0	0	0	4	1
TGME49_289570	phosphatidylinositol transfer protein	0	0	0	0	0	0	0	4	0
TGME49_221330	DNA gyrase/topoisomerase IV, A subunit domain-containing protein	0	0	0	0	0	0	0	4	2
TGME49_251500	eukaryotic initiation factor-3, subunit 3, putative	0	0	0	0	0	0	0	4	2
TGME49_286230	hypothetical protein	0	0	0	0	0	0	0	4	0
TGME49_294890	hypothetical protein	0	0	0	0	0	0	0	4	1
TGME49_312140	hypothetical protein	0	0	0	0	0	0	0	4	0
TGME49_320000	SCY kinase (incomplete catalytic triad)	0	0	0	0	0	0	0	4	0
TGME49_216260	eukaryotic initiation factor-2B, gamma subunit, putative	0	0	0	0	0	0	0	4	0
TGME49_202630	ATP-dependent metallopeptidase HflB subfamily protein	0	0	0	0	0	0	0	4	0
TGME49_237010	hypothetical protein	0	0	0	0	0	0	0	4	0
TGME49_237870	FYVE zinc finger domain-containing protein	0	0	0	0	0	0	0	4	0
TGME49_249180	bifunctional dihydrofolate reductase-thymidylate synthase	0	0	0	0	0	0	0	4	0
TGME49_260170	elongation factor EF-G, putative	0	0	0	0	0	0	0	4	0
TGME49_280560	selenide, water dikinase	0	0	0	0	0	0	0	4	0
TGME49_285700	ubiquitin fusion degradation protein UFD1AP	0	0	0	0	0	0	0	4	0
TGME49_304470	oxidoreductase, putative	0	0	0	0	0	0	0	4	0
TGME49_223410	eukaryotic initiation factor-4E, putative	0	0	0	0	2	0	1	3	0
TGME49_224890	hypothetical protein	0	0	0	0	3	0	0	3	0
TGME49_257350	eukaryotic translation initiation factor, putative	0	0	0	0	3	0	0	3	1
TGME49_229250	ribosomal protein RPL28	3	0	0	0	2	0	0	3	1
TGME49_297060	phosphoglycerate mutase PGMII	0	0	0	0	1	0	0	3	0
TGME49_251690	seryl-tRNA synthetase, cytoplasmic, putative	0	0	0	0	1	0	0	3	0
TGME49_242830	XRN 5'-3' exonuclease N-terminus protein	0	0	0	0	1	0	0	3	0
TGME49_291680	Sec23/Sec24 trunk domain-containing protein	0	0	0	0	1	0	0	3	0
TGME49_207620	pyridine nucleotide-disulfide oxidoreductase domain-containing protein	0	0	0	0	0	0	0	3	0
TGME49_312480	uracil phosphoribosyltransferase FUR1, putative	0	0	0	0	0	0	0	3	0
TGME49_250820	hypothetical protein	1	0	0	0	0	0	0	3	1
TGME49_253350	hypothetical protein	0	0	0	0	0	0	0	3	3
TGME49_297430	hypothetical protein	1	0	0	0	0	0	0	3	2
TGME49_271470	hypothetical protein	0	0	0	0	0	0	0	3	0
TGME49_290950	clathrin heavy chain, putative	0	0	0	0	0	0	0	3	0
TGME49_211440	hypothetical protein	0	0	0	0	0	0	0	3	1
TGME49_216000	alveolin domain containing intermediate filament IMC3	0	0	0	0	0	0	0	3	0
TGME49_230860	hypothetical protein	0	0	0	0	0	0	0	3	0
TGME49_243290	hypothetical protein	0	0	0	0	0	0	0	3	2
TGME49_290600	succinyl-CoA-synthetase alpha SCSA	0	0	0	0	0	0	0	3	0
TGME49_207370	hypothetical protein	0	0	0	0	0	0	0	3	0
TGME49_224350	aminopeptidase N, putative	0	0	0	0	0	0	0	3	2
TGME49_247290	hypothetical protein	0	0	0	0	0	0	0	3	0
TGME49_262040	SAC3/GANP family protein	0	0	0	0	0	0	0	3	1
TGME49_283830	type I inorganic pyrophosphatase PPase	0	0	0	0	0	0	0	3	0
TGME49_240830	hydrolase, alpha/beta fold family protein	0	0	0	0	0	0	0	3	0
TGME49_275470	dense granule protein GRA15	0	0	0	0	0	0	0	3	1
TGME49_290200	NAD/NADP octopine/nopaline dehydrogenase, alpha-helical domain-containing protein	0	0	0	0	0	0	0	3	0
TGME49_288830	NADH dehydrogenase (NDH2-II)	0	0	0	0	1	0	0	3	0
TGME49_297330	hypothetical protein	0	0	0	0	0	0	0	3	0
TGME49_272695	hypothetical protein	0	0	0	0	0	0	0	3	0
TGME49_252290	importin alpha, putative	0	0	0	0	0	0	0	3	0
TGME49_225800	iron-sulfur assembly ATPase	0	0	0	0	0	0	0	3	2
TGME49_215070	ferodoxin FD	0	0	0	0	0	0	0	3	1
TGME49_308580	Lon protease family protein	0	0	0	0	0	0	0	3	0
TGME49_291950	RNA recognition motif-containing protein	0	0	0	0	0	0	0	3	0
TGME49_286510	hypothetical protein	0	0	0	0	0	0	0	3	0
TGME49_219460	hypothetical protein	0	0	0	0	3	0	0	3	0
TGME49_315770	cytochrome p450 superfamily protein	0	0	0	0	2	0	0	3	0
TGME49_237460	hypothetical protein	0	0	0	0	0	0	0	3	1
TGME49_315080	hypothetical protein	0	0	0	0	0	0	0	3	0
TGME49_276970	hypothetical protein	0	0	0	0	0	0	0	3	1
TGME49_289230	50S ribosomal protein L12, putative	0	0	0	0	0	0	0	3	2
TGME49_222270	hypothetical protein	0	0	0	0	0	0	0	3	1
TGME49_248700	alveolin domain containing intermediate filament IMC12	0	0	0	0	0	0	0	3	0
TGME49_215940	Acetyl-coenzyme A transporter, putative	0	0	0	0	2	0	0	3	0
TGME49_235970	eukaryotic initiation factor-2 gamma, putative	0	0	0	0	0	0	0	3	0
TGME49_266990	beta-COP	0	0	0	0	0	0	0	3	0
TGME49_325800	EGF family domain-containing protein	0	0	0	0	0	0	0	3	2
TGME49_262450	hypothetical protein	0	0	0	0	0	0	0	3	0
TGME49_242010	glucose inhibited division protein A subfamily protein	0	0	0	0	0	0	0	3	0
TGME49_222860	eukaryotic translation initiation factor, putative	0	0	0	0	0	0	0	3	0
TGME49_304955	serine/threonine specific protein phosphatase	0	0	0	0	0	0	0	2	0
TGME49_233905	histone kinase SNF1, putative	0	0	0	0	1	0	0	2	0
TGME49_300260	threonyl-tRNA synthetase family protein	0	0	0	0	1	0	0	2	0
TGME49_263690	hypothetical protein	0	0	0	0	0	0	0	2	0
TGME49_230520	cyclophilin 1, putative	0	0	0	0	0	0	0	2	0
TGME49_262910	NADH-cytochrome b5 reductase 1, putative	0	0	0	0	1	0	0	2	0
TGME49_304670	leucine rich repeat-containing protein	0	0	0	0	0	0	0	2	0
TGME49_236840	zinc finger (C-x8-C-x5-C-x3-H)-2, putative	0	0	0	0	1	0	0	2	0
TGME49_232280	hypothetical protein	0	0	0	0	1	0	0	2	0
TGME49_230140	vacuolar sorting protein 9 (vps9) domain-containing protein	0	0	0	0	1	0	0	2	0
TGME49_220230	leucine rich repeat-containing protein	0	0	0	0	0	0	0	2	0
TGME49_313380	hypothetical protein	0	0	0	0	0	0	0	2	2
TGME49_201380	chorismate synthase, putative	0	0	0	0	0	0	0	2	0
TGME49_247380	hypothetical protein	0	0	0	0	1	0	0	2	1
TGME49_206300	hypothetical protein	0	0	0	0	3	0	0	2	0
TGME49_313580	cytochrome b5 family heme/steroid binding domain-containing protein	0	0	0	0	0	0	0	2	0
TGME49_205150	ACR, YagE family COG1723 domain-containing protein	0	0	0	0	0	0	0	2	0
TGME49_240520	hypothetical protein	0	0	0	0	0	0	0	2	2
TGME49_268690	hypothetical protein	0	0	0	0	0	0	0	2	1
TGME49_320670	vacuolar protein sorting 16, putative	0	0	0	0	0	0	0	2	0
TGME49_297220	AMP-binding enzyme domain-containing protein	0	0	0	0	1	0	0	2	0
TGME49_255250	tRNA (cytosine(34)-C(5))-methyltransferase, putative	0	0	0	0	0	0	0	2	0
TGME49_254880	Alpha-galactosidase	0	0	0	0	0	0	0	2	1
TGME49_314070	hypothetical protein	0	0	0	0	2	0	0	2	0
TGME49_264940	kelch repeat-containing protein	0	0	0	0	0	0	0	2	0
TGME49_237560	iron-sulfur cluster protein ISCU	1	0	0	0	0	0	0	2	0
TGME49_273370	coatomer gamma 2-subunit protein, putative	0	0	0	0	0	0	0	2	1
TGME49_273920	aldose reductase, putative	0	0	0	0	0	0	0	2	0
TGME49_239620	5'-nucleotidase, C-terminal domain-containing protein	0	0	0	0	1	0	0	2	0
TGME49_254770	Ser/Thr phosphatase family protein	0	0	0	0	0	0	0	2	1
TGME49_254470	hypothetical protein	0	0	2	0	0	0	0	2	0
TGME49_248300	hypothetical protein	0	0	0	0	0	0	0	2	1
TGME49_231070	protein kinase	0	0	0	0	0	0	0	2	0
TGME49_299780	hypothetical protein	0	0	0	0	0	0	0	2	1
TGME49_316330	superoxide dismutase SOD2	0	0	0	0	0	0	0	2	0
TGME49_278780	hypothetical protein	0	0	0	0	0	0	1	2	0
TGME49_285220	CAP-Gly domain-containing protein	0	0	0	0	2	0	0	2	0
TGME49_215980	hypothetical protein	0	0	0	0	1	0	0	2	2
TGME49_219850	prolyl-tRNA synthetase (ProRS)	0	0	0	0	1	0	0	2	0
TGME49_289190	tetratricopeptide repeat-containing protein	0	0	0	0	1	0	0	2	0
TGME49_294620	eukaryotic initiation factor-3, subunit 8, putative	0	0	0	0	1	0	0	2	0
TGME49_247580	glutaredoxin domain-containing protein	0	0	0	0	0	0	0	2	2
TGME49_211710	TB2/DP1, HVA22 family protein	0	0	0	0	0	0	0	2	0
TGME49_227150	glutaredoxin, putative	0	0	0	0	0	0	0	2	1
TGME49_308920	splicing factor U2AF protein	0	0	0	0	0	0	0	2	1
TGME49_297925	HesB-like domain-containing protein	0	0	0	0	0	0	0	2	1
TGME49_238140	hypothetical protein	0	0	0	0	0	0	0	2	0
TGME49_238190	DNA-directed RNA polymerase II RPB3	0	0	0	0	0	0	0	2	0
TGME49_240220	hypothetical protein	0	0	0	0	0	0	0	2	0
TGME49_257040	TB2/DP1, HVA22 family protein	0	0	0	0	0	0	0	2	0
TGME49_260600	Pumilio-family RNA binding repeat-containing protein	0	0	0	0	0	0	0	2	0
TGME49_318510	N-ethylmaleimide-sensitive fusion protein, putative	0	0	0	0	1	0	0	2	0
TGME49_239752	hypothetical protein	0	0	0	0	0	0	0	2	0
TGME49_271050	SAG-related sequence SRS34A	0	0	0	0	0	0	0	2	0
TGME49_314460	hypothetical protein	0	0	0	0	0	0	0	2	2
TGME49_213050	hypothetical protein	0	0	0	0	0	0	0	2	0
TGME49_291670	DEAD/DEAH box helicase domain-containing protein	0	0	0	0	0	0	0	2	1
TGME49_305610	hypothetical protein	0	0	0	0	0	0	0	2	0
TGME49_259550	dihydropteroate synthase	0	0	0	0	0	0	0	2	0
TGME49_221360	hypothetical protein	0	0	0	0	0	0	0	2	0
TGME49_220890	hypothetical protein	0	0	0	0	0	0	0	2	2
TGME49_212260	Sjogren's syndrome/scleroderma autoantigen 1 (Autoantigen p27) protein	0	0	0	0	0	0	0	2	0
TGME49_262730	rhoptry protein ROP16	0	0	0	0	0	0	0	2	0
TGME49_320220	ubiquinol cytochrome c oxidoreductase, putative	0	0	0	0	0	0	0	2	0
TGME49_235620	deoxyhypusine synthase	0	0	0	0	2	0	1	2	0
TGME49_224270	hypothetical protein	1	0	0	0	0	0	0	2	0
TGME49_236860	haloacid dehalogenase family hydrolase domain-containing protein	0	0	0	0	1	0	0	2	0
TGME49_207640	isoleucyl-tRNA synthetase family protein	0	0	0	0	1	0	0	2	0
TGME49_215260	carbamoylphosphate synthetase	0	0	0	0	1	0	0	2	0
TGME49_262050	rhoptry kinase family protein ROP39	0	0	0	0	1	0	0	2	0
TGME49_219682	pyruvate dehydrogenase kinase, putative	0	0	0	0	0	0	0	2	0
TGME49_294898	tetratricopeptide repeat-containing protein	0	0	0	0	1	0	0	2	0
TGME49_286620	S1 RNA binding domain-containing protein	0	0	0	0	0	0	0	2	0
TGME49_230210	alveolin domain containing intermediate filament IMC10	0	0	0	0	1	0	0	2	0
TGME49_276210	phosphoglycerate mutase family protein	0	0	0	0	0	0	0	2	1
TGME49_216900	cytokine induced apoptosis inhibitor 1 family protein	0	0	0	0	2	0	0	2	0
TGME49_234450	ribosomal protein RPS15A	0	0	0	0	0	0	0	2	0
TGME49_224600	GTP binding protein	0	0	0	0	0	0	0	2	0
TGME49_297720	trehalose-phosphatase	0	0	0	0	0	0	0	2	0
TGME49_278470	hypothetical protein	0	0	0	0	0	0	0	2	0
TGME49_321680	hypothetical protein	0	0	0	0	2	0	0	2	1
TGME49_220090	hypothetical protein	0	0	0	0	0	0	0	2	0
TGME49_230160	hypothetical protein	0	0	0	0	0	0	0	2	0
TGME49_315310	hypothetical protein	0	0	0	0	0	0	0	2	0
TGME49_217590	50S ribosomal protein L17, putative	0	0	0	0	0	0	0	2	0
TGME49_310770	hypothetical protein	0	0	0	0	0	0	0	2	0
TGME49_232080	hypothetical protein	0	0	0	0	0	0	0	2	0
TGME49_306650	hypothetical protein	0	0	0	0	0	0	0	2	0
TGME49_321410	hypothetical protein	0	0	0	0	0	0	0	2	0
TGME49_267280	hypothetical protein	0	0	0	0	0	0	0	2	0
TGME49_209100	PUB domain-containing protein	0	0	0	0	0	0	0	2	0
TGME49_263660	hypothetical protein	0	0	0	0	0	0	0	2	0
TGME49_220360	FAD binding domain-containing protein	0	0	0	0	0	0	0	2	0
TGME49_272650	3'5'-cyclic nucleotide phosphodiesterase domain-containing protein	0	0	0	0	0	0	0	2	0
TGME49_310440	membrane occupation and recognition nexus protein MORN1	0	0	0	0	0	0	0	2	0
TGME49_208842	DEAD/DEAH box helicase domain-containing protein	0	0	0	0	0	0	0	2	0
TGME49_306260	hypothetical protein	0	0	0	0	0	0	0	2	0
TGME49_315860	EF hand domain-containing protein	0	0	0	0	0	0	0	2	1
TGME49_273905	hypothetical protein	0	0	0	0	0	0	0	2	0
TGME49_268830	hypothetical protein	0	0	0	0	0	0	0	2	0
TGME49_302050	elongation factor tu, apicoplast, putative	1	0	0	0	0	0	0	2	0
TGME49_308020	SAG-related sequence SRS57	0	0	0	0	0	0	0	2	0
TGME49_219250	acetyltransferase, GNAT family protein	0	0	0	0	1	0	0	2	0
TGME49_207760	DnaJ C terminal region domain-containing protein	0	0	0	0	0	0	0	2	0
TGME49_291050	histone kinase SNF1, putative	1	0	0	0	0	0	1	2	1
TGME49_267650	hypothetical protein	0	0	0	0	0	0	0	2	0
TGME49_217780	Sec20 protein	0	0	0	0	0	0	0	2	0
TGME49_280600	histidyl-tRNA synthetase (HisRS), putative	1	0	0	0	0	0	0	2	0
TGME49_320480	Rab11b	0	0	0	0	0	0	0	2	0
TGME49_308010	hypothetical protein	0	0	0	0	2	0	0	1	0
TGME49_228400	WD domain, G-beta repeat-containing protein	0	0	0	0	2	0	0	1	0
TGME49_299210	CTP synthase	0	0	0	0	2	0	0	1	0
TGME49_311430	fibrillarin	0	0	0	0	2	0	0	1	0
TGME49_259660	orotate phosphoribosyltransferase	0	0	0	0	2	0	0	1	0
TGME49_248770	hypothetical protein	0	0	0	0	0	0	0	1	2
TGME49_292080	leucyl-tRNA synthetase	0	0	0	0	2	0	0	1	0
TGME49_236910	U2 snRNP auxiliary factor, putative	0	0	0	0	2	0	0	1	0
TGME49_243730	rhoptry protein ROP9	0	0	0	0	0	0	0	1	2
TGME49_279380	hypothetical protein	0	0	0	0	2	0	0	1	0
TGME49_202070	hypothetical protein	0	0	0	0	3	0	0	0	0
TGME49_311240	DnaJ family chaperone, putative	0	0	0	0	2	0	0	0	0
TGME49_260240	ccr4-associated factor family protein	0	0	0	0	2	0	0	0	0
TGME49_219320	acid phosphatase GAP50	0	0	0	0	2	0	0	0	1
TGME49_223920	rhoptry neck protein RON3	0	0	0	0	2	0	0	0	0
TGME49_311920	GRAM domain-containing protein	0	0	0	0	2	0	0	0	0
TGME49_289760	hypothetical protein	6	0	0	0	0	0	0	0	0
TGME49_223940	GAP45	0	0	0	0	0	0	0	0	5
TGME49_214080	toxofilin	0	0	1	0	0	0	0	0	3

## Sheet: Supplementary file 2b
Supplementary 2b. Volcano analysis of mass-spectrometry datasets from APT1-TurboID and the parental line
RH	RH	RH	APT1	APT1	APT1	APT1	APT1	APT1	GeneID	APT	mean1	sd1	se1	RH	mean2	sd2	se2	p_value	p_adjust	enrich_group	sign	log2foldchange	threshold	Result	TMD	RHku80_1	RHku80_2	RHku80_3	APT1_1	APT1_2	APT1_3	APT1_4	APT1_5	APT1_6
0.137504	0.237504	0.137504	4.32193	4.45943	4.24793	3.80735	4	3.70044	TGME49_261070	APT	4.08951	0.301647	0.123147	RH	0.170837	0.057735	0.0333333	1.55e-07	0.000128523	APT	***	4.58124	Up	APT 1	6	0	0	0	19	21	18	13	15	12
0.137504	0.237504	0.137504	1.58496	2	1.58496	1.58496	1.58496	1.58496	TGME49_209420	APT	1.65414	0.169438	0.0691729	RH	0.170837	0.057735	0.0333333	4.06e-07	0.000155794	APT	***	3.27539	Up		0	0	0	0	2	3	2	2	2	2
0.137504	0.237504	0.137504	3.58496	3.80735	3.32193	3.70044	3.80735	3	TGME49_261500	APT	3.53701	0.319318	0.130361	RH	0.170837	0.057735	0.0333333	5.64e-07	0.000155794	APT	***	4.37184	Up		0	0	0	0	11	13	9	12	13	7
0.137504	0.237504	0.137504	6.61471	6.82018	5.49185	6.12928	7.11894	6.06609	TGME49_297745	APT	6.37351	0.590734	0.241166	RH	0.170837	0.057735	0.0333333	1.19e-06	0.000227728	APT	***	5.2214	Up		1	0	0	0	97	112	44	69	138	66
0.137504	0.237504	0.137504	4.24793	3.90689	3.70044	3.16993	4.08746	4.16993	TGME49_279360	APT	3.88043	0.39991	0.163262	RH	0.170837	0.057735	0.0333333	1.6e-06	0.000227728	APT	***	4.50552	Up		1	0	0	0	18	14	12	8	16	17
0.137504	0.237504	0.137504	2.58496	2.58496	2	2.58496	2.80735	2.32193	TGME49_297245	APT	2.4807	0.281282	0.114833	RH	0.170837	0.057735	0.0333333	1.81e-06	0.000227728	APT	***	3.86005	Up	apicoplast	11	0	0	0	5	5	3	5	6	4
0.137504	0.237504	0.137504	4.80735	4.75489	3.80735	4.24793	4.58496	3.80735	TGME49_291940	APT	4.33497	0.453058	0.18496	RH	0.170837	0.057735	0.0333333	1.92e-06	0.000227728	APT	***	4.66533	Up	apicoplast	8	0	0	0	27	26	13	18	23	13
0.137504	0.237504	0.137504	5.78136	5.58496	4.32193	5.16993	5.88264	5.2854	TGME49_203240	APT	5.3377	0.56879	0.232208	RH	0.170837	0.057735	0.0333333	2.45e-06	0.000253826	APT	***	4.96553	Up		3	0	0	0	54	47	19	35	58	38
0.137504	0.237504	0.137504	5.42626	5.39232	4.08746	5.04439	5.83289	5	TGME49_289080	APT	5.13055	0.59359	0.242332	RH	0.170837	0.057735	0.0333333	3.86e-06	0.000355779	APT	***	4.90842	Up		0	0	0	0	42	41	16	32	56	31
0.137504	0.237504	0.137504	6.50779	6.80735	4.9542	5.85798	6.83289	5.90689	TGME49_291180	APT	6.14452	0.721195	0.294427	RH	0.170837	0.057735	0.0333333	4.42e-06	0.000366579	APT	***	5.16861	Up		0	0	0	0	90	111	30	57	113	59
0.137504	0.237504	0.137504	6.02237	6.16993	4.32193	5.32193	6.20945	5.58496	TGME49_259260	APT	5.60509	0.719097	0.29357	RH	0.170837	0.057735	0.0333333	7.03e-06	0.000492635	APT	***	5.03605	Up	FtsH	1	0	0	0	64	71	19	39	73	47
0.137504	0.237504	0.137504	3.45943	3.90689	3	3.70044	4.45943	3.58496	TGME49_289680	APT	3.68519	0.485661	0.19827	RH	0.170837	0.057735	0.0333333	7.13e-06	0.000492635	APT	***	4.43105	Up		0	0	0	0	10	14	7	12	21	11
0.137504	0.237504	0.137504	5.70044	5.93074	4.08746	5.16993	6.24793	5.55459	TGME49_230420	APT	5.44851	0.758471	0.309645	RH	0.170837	0.057735	0.0333333	1.09e-05	0.000639826	APT	***	4.99517	Up	Non-apicoplast	7	0	0	0	51	60	16	35	75	46
0.137504	0.237504	0.137504	3.90689	3.58496	2.58496	3.16993	3.80735	3.58496	TGME49_205240	APT	3.43984	0.489693	0.199916	RH	0.170837	0.057735	0.0333333	1.09e-05	0.000639826	APT	***	4.33165	Up		4	0	0	0	14	11	5	8	13	11
0.137504	0.237504	0.137504	5.08746	5.45943	3.70044	5.16993	5.72792	4.64386	TGME49_300120	APT	4.96484	0.719131	0.293584	RH	0.170837	0.057735	0.0333333	1.32e-05	0.000639826	APT	***	4.86106	Up		0	0	0	0	33	43	12	35	52	24
0.137504	0.237504	0.137504	4.70044	4.80735	3.32193	3.90689	4.80735	3.90689	TGME49_288600	APT	4.24181	0.619766	0.253018	RH	0.170837	0.057735	0.0333333	1.35e-05	0.000639826	APT	***	4.63399	Up		0	0	0	0	25	27	9	14	27	14
0.137504	0.237504	0.137504	5.39232	5.70044	3.80735	4.80735	5.49185	4.45943	TGME49_232340	APT	4.94313	0.723708	0.295453	RH	0.170837	0.057735	0.0333333	1.4e-05	0.000639826	APT	***	4.85473	Up		0	0	0	0	41	51	13	27	44	21
0.137504	0.237504	0.137504	4.85798	4.70044	3.16993	3.90689	4.64386	4.32193	TGME49_267510	APT	4.26684	0.634889	0.259192	RH	0.170837	0.057735	0.0333333	1.49e-05	0.000639826	APT	***	4.64248	Up		2	0	0	0	28	25	8	14	24	19
0.137504	0.237504	0.137504	2	2	1.58496	2.58496	2	2	TGME49_270530	APT	2.02832	0.319257	0.130336	RH	0.170837	0.057735	0.0333333	1.51e-05	0.000639826	APT	***	3.56959	Up		0	0	0	0	3	3	2	5	3	3
0.137504	0.237504	0.137504	4.80735	5.35755	3.70044	4.64386	5.2854	3.90689	TGME49_293180	APT	4.61692	0.689416	0.281453	RH	0.170837	0.057735	0.0333333	1.54e-05	0.000639826	APT	***	4.75624	Up		0	0	0	0	27	40	12	24	38	14
0.137504	0.237504	0.137504	4.75489	4.90689	3.45943	4.08746	5.45943	4.32193	TGME49_225310	APT	4.49834	0.697954	0.284939	RH	0.170837	0.057735	0.0333333	1.89e-05	0.000745132	APT	***	4.7187	Up		0	0	0	0	26	29	10	16	43	19
0.137504	0.237504	0.137504	4.08746	3.16993	2.80735	3.32193	4.24793	3.80735	TGME49_294360	APT	3.57366	0.563354	0.229988	RH	0.170837	0.057735	0.0333333	1.98e-05	0.000745132	APT	***	4.38671	Up		0	0	0	0	16	8	6	9	18	13
0.137504	0.237504	0.137504	5.24793	5.35755	3.90689	4.58496	6.37504	5.04439	TGME49_205040	APT	5.08613	0.825185	0.33688	RH	0.170837	0.057735	0.0333333	2.42e-05	0.000873381	APT	***	4.89588	Up		8	0	0	0	37	40	14	23	82	32
0.137504	0.237504	0.137504	4.80735	5.32193	3.32193	4.24793	5.32193	4.52356	TGME49_313080	APT	4.59077	0.754733	0.308119	RH	0.170837	0.057735	0.0333333	2.58e-05	0.000890676	APT	***	4.74805	Up		1	0	0	0	27	39	9	18	39	22
0.137504	0.237504	0.137504	3.58496	3.70044	2.58496	3	4.08746	3	TGME49_305450	APT	3.3263	0.556557	0.227214	RH	0.170837	0.057735	0.0333333	2.71e-05	0.000900157	APT	***	4.28323	Up		1	0	0	0	11	12	5	7	16	7
0.137504	0.237504	0.137504	3.16993	3.70044	2.32193	2.80735	3.70044	3	TGME49_309580	APT	3.11668	0.533912	0.217969	RH	0.170837	0.057735	0.0333333	3.06e-05	0.000974218	APT	***	4.18932	Up	apicoplast	8	0	0	0	8	12	4	6	12	7
0.137504	0.237504	0.137504	4.90689	5.2854	3.16993	4.24793	5.16993	4.39232	TGME49_314970	APT	4.52873	0.783645	0.319922	RH	0.170837	0.057735	0.0333333	3.37e-05	0.000996651	APT	***	4.72842	Up		2	0	0	0	29	38	8	18	35	20
0.137504	0.237504	0.137504	3	3.32193	2	2.80735	2.80735	2.32193	TGME49_246340	APT	2.70976	0.47586	0.194269	RH	0.170837	0.057735	0.0333333	3.41e-05	0.000996651	APT	***	3.98747	Up		3	0	0	0	7	9	3	6	6	4
0.137504	0.237504	0.137504	5.42626	5.61471	3.58496	4.58496	6.08746	5.04439	TGME49_262990	APT	5.05713	0.883077	0.360515	RH	0.170837	0.057735	0.0333333	3.55e-05	0.000996651	APT	***	4.88763	Up		0	0	0	0	42	48	11	23	67	32
0.137504	0.237504	0.137504	3.70044	3.58496	2.32193	3	3.90689	3.16993	TGME49_249970	APT	3.28069	0.578131	0.236021	RH	0.170837	0.057735	0.0333333	3.61e-05	0.000996651	APT	***	4.26331	Up		0	0	0	0	12	11	4	7	14	8
0.137504	0.237504	0.137504	2.58496	2.58496	1.58496	2	2.58496	2.32193	TGME49_288030	APT	2.27696	0.410411	0.16755	RH	0.170837	0.057735	0.0333333	3.77e-05	0.00100878	APT	***	3.73642	Up		3	0	0	0	5	5	2	3	5	4
0.137504	0.237504	0.137504	3.32193	3.32193	2	2.80735	3.45943	2.80735	TGME49_201700	APT	2.953	0.543934	0.22206	RH	0.170837	0.057735	0.0333333	4.53e-05	0.00117419	APT	***	4.11149	Up		0	0	0	0	9	9	3	6	10	6
0.137504	0.237504	0.137504	4.32193	4.70044	3	3.70044	5.20945	4.16993	TGME49_262390	APT	4.1837	0.771126	0.314811	RH	0.170837	0.057735	0.0333333	4.68e-05	0.00117461	APT	***	4.61409	Up		0	0	0	0	19	25	7	12	36	17
0.137504	0.237504	0.137504	4.85798	4.85798	3	4.32193	5.49185	4.52356	TGME49_244380	APT	4.50888	0.839269	0.34263	RH	0.170837	0.057735	0.0333333	4.93e-05	0.00120126	APT	***	4.72208	Up		0	0	0	0	28	28	7	19	44	22
0.137504	0.237504	0.137504	5.61471	5.55459	3.70044	3.90689	4.64386	3.90689	TGME49_208050	APT	4.55456	0.860282	0.351208	RH	0.170837	0.057735	0.0333333	5.31e-05	0.00125842	APT	***	4.73662	Up	apicoplast	7	0	0	0	48	46	12	14	24	14
1	0.237504	0.137504	4.58496	4.90689	3	3.80735	5.32193	4.75489	TGME49_311720	APT	4.396	0.845952	0.345359	RH	0.458336	0.471752	0.272366	5.8e-05	0.00130298	APT	***	3.26172	Up		1	1	0	0	23	29	7	13	39	26
0.137504	1.1	0.137504	5.67243	5.85798	3.80735	4.80735	5.93074	4.70044	TGME49_258970	APT	5.12938	0.837063	0.341729	RH	0.458336	0.555698	0.320832	5.82e-05	0.00130298	APT	***	3.48431	Up		0	0	1	0	50	57	13	27	60	25
0.137504	0.237504	0.137504	5.35755	5.39232	3.45943	4.39232	6.20945	4.64386	TGME49_321620	APT	4.90915	0.955456	0.390063	RH	0.170837	0.057735	0.0333333	6.19e-05	0.00134624	APT	***	4.84478	Up		0	0	0	0	40	41	10	20	73	24
0.137504	0.237504	0.137504	3.45943	3.80735	2.32193	2.80735	4.08746	3.32193	TGME49_268630	APT	3.30091	0.648494	0.264747	RH	0.170837	0.057735	0.0333333	6.49e-05	0.00134624	APT	***	4.27217	Up		1	0	0	0	10	13	4	6	16	9
0.137504	0.237504	0.137504	4.32193	4.58496	2.80735	3.80735	5.24793	4.39232	TGME49_226390	APT	4.19364	0.8236	0.336233	RH	0.170837	0.057735	0.0333333	6.5e-05	0.00134624	APT	***	4.61751	Up		0	0	0	0	19	23	6	13	37	20
0.137504	0.237504	0.137504	4.39232	4.08746	3	2.58496	4.24793	3.70044	TGME49_246982	APT	3.66885	0.728991	0.29761	RH	0.170837	0.057735	0.0333333	6.9e-05	0.00139559	APT	***	4.42464	Up		1	0	0	0	20	16	7	5	18	12
0.137504	0.237504	0.137504	3.58496	2.80735	2	3.16993	3.45943	2.58496	TGME49_232050	APT	2.93444	0.594258	0.242605	RH	0.170837	0.057735	0.0333333	7.59e-05	0.00149813	APT	***	4.10239	Up		2	0	0	0	11	6	3	8	10	5
0.137504	0.237504	0.137504	1.58496	2.32193	1.58496	2.32193	1.58496	2.32193	TGME49_309560	APT	1.95345	0.403653	0.164791	RH	0.170837	0.057735	0.0333333	8.14e-05	0.00157018	APT	***	3.51533	Up		7	0	0	0	2	4	2	4	2	4
0.137504	0.237504	0.137504	4.32193	4.90689	2.80735	3.90689	5.2854	3.90689	TGME49_296010	APT	4.18923	0.872152	0.356055	RH	0.170837	0.057735	0.0333333	8.75e-05	0.0016495	APT	***	4.61599	Up		0	0	0	0	19	29	6	14	38	14
0.137504	0.237504	0.137504	3	2.80735	2.32193	2.32193	3.80735	3.58496	TGME49_318570	APT	2.97392	0.623955	0.254728	RH	0.170837	0.057735	0.0333333	9.17e-05	0.00168441	APT	***	4.12168	Up		4	0	0	0	7	6	4	4	13	11
0.137504	0.237504	0.137504	4.08746	4.08746	2.80735	2.80735	4.75489	3.58496	TGME49_290160	APT	3.68825	0.777056	0.317232	RH	0.170837	0.057735	0.0333333	9.35e-05	0.00168441	APT	***	4.43224	Up		1	0	0	0	16	16	6	6	26	11
0.137504	0.237504	0.137504	1	1.58496	1	1	1	1	TGME49_215060	APT	1.09749	0.23881	0.0974938	RH	0.170837	0.057735	0.0333333	0.000102629	0.0017992	APT	***	2.68352	Up		0	0	0	0	1	2	1	1	1	1
0.137504	0.237504	0.137504	1.58496	1.58496	1	1	1.58496	1.58496	TGME49_239260	APT	1.38997	0.302073	0.123321	RH	0.170837	0.057735	0.0333333	0.000104175	0.0017992	APT	***	3.02437	Up		0	0	0	0	2	2	1	1	2	2
0.137504	0.237504	0.137504	3	3.16993	2	2	2.58496	2	TGME49_321590	APT	2.45915	0.537774	0.219545	RH	0.170837	0.057735	0.0333333	0.000114156	0.00193133	APT	***	3.84747	Up	apicoplast	6	0	0	0	7	8	3	3	5	3
0.137504	0.237504	0.137504	3.90689	3.70044	2	3	3.80735	3.16993	TGME49_268340	APT	3.2641	0.717672	0.292988	RH	0.170837	0.057735	0.0333333	0.00011695	0.00193903	APT	***	4.25599	Up		0	0	0	0	14	12	3	7	13	8
0.137504	0.237504	0.137504	5.55459	5.88264	3	4.64386	5.80735	4.52356	TGME49_214600	APT	4.902	1.0986	0.448503	RH	0.170837	0.057735	0.0333333	0.000125614	0.00201408	APT	***	4.84268	Up		0	0	0	0	46	58	7	24	55	22
0.137504	0.237504	0.137504	3.80735	3.90689	2.32193	3	4.39232	3	TGME49_313360	APT	3.40475	0.76022	0.310359	RH	0.170837	0.057735	0.0333333	0.000126336	0.00201408	APT	***	4.31686	Up		0	0	0	0	13	14	4	7	20	7
0.137504	0.237504	0.137504	3	3.16993	2	2.58496	3.45943	2	TGME49_237150	APT	2.70239	0.613313	0.250384	RH	0.170837	0.057735	0.0333333	0.000138958	0.00217351	APT	***	3.98354	Up		8	0	0	0	7	8	3	5	10	3
0.137504	0.237504	0.137504	4.39232	4.16993	2.32193	3.16993	4	3	TGME49_304750	APT	3.50902	0.805152	0.328702	RH	0.170837	0.057735	0.0333333	0.000144881	0.0022242	APT	***	4.36038	Up	apicoplast	7	0	0	0	20	17	4	8	15	7
0.137504	0.237504	0.137504	2.58496	3	1.58496	2.58496	3.32193	2.32193	TGME49_215420	APT	2.56646	0.597077	0.243756	RH	0.170837	0.057735	0.0333333	0.000158636	0.00239107	APT	***	3.90909	Up		0	0	0	0	5	7	2	5	9	4
0.137504	0.237504	0.137504	2.32193	2.80735	1.58496	2	3	2	TGME49_262660	APT	2.28571	0.536273	0.218932	RH	0.170837	0.057735	0.0333333	0.000166763	0.00246869	APT	***	3.74195	Up	apicoplast	12	0	0	0	4	6	2	3	7	3
0.137504	0.237504	0.137504	5.24793	5.64386	3	3.90689	6.06609	5.12928	TGME49_289070	APT	4.83234	1.15373	0.47101	RH	0.170837	0.057735	0.0333333	0.000171964	0.00250102	APT	***	4.82203	Up	Negtive	11	0	0	0	37	49	7	14	66	34
0.137504	0.237504	0.137504	2.58496	3.16993	1.58496	3	3.32193	2.32193	TGME49_231630	APT	2.66395	0.646422	0.263901	RH	0.170837	0.057735	0.0333333	0.00019705	0.00281646	APT	***	3.96288	Up		0	0	0	0	5	8	2	7	9	4
0.137504	0.237504	0.137504	4.58496	4.64386	2.32193	3.58496	4.32193	3	TGME49_285500	APT	3.74294	0.943618	0.38523	RH	0.170837	0.057735	0.0333333	0.000230788	0.00312145	APT	***	4.45348	Up		4	0	0	0	23	24	4	11	19	7
0.137504	0.237504	0.137504	3.80735	3.58496	2	2.80735	4.39232	3.80735	TGME49_294220	APT	3.39989	0.855805	0.349381	RH	0.170837	0.057735	0.0333333	0.000231489	0.00312145	APT	***	4.3148	Up		1	0	0	0	13	11	3	6	20	13
0.137504	0.237504	0.137504	1.58496	1.58496	1	1	1	1.58496	TGME49_258730	APT	1.29248	0.320397	0.130802	RH	0.170837	0.057735	0.0333333	0.000232772	0.00312145	APT	***	2.91945	Up		1	0	0	0	2	2	1	1	1	2
0.137504	0.237504	0.137504	3.80735	4.16993	2	3.16993	4.52356	3.45943	TGME49_254690	APT	3.5217	0.888675	0.3628	RH	0.170837	0.057735	0.0333333	0.00023345	0.00312145	APT	***	4.36558	Up		1	0	0	0	13	17	3	8	22	10
0.137504	0.237504	0.137504	2.80735	3.16993	2	2.32193	4	3.58496	TGME49_255880	APT	2.9807	0.757062	0.309069	RH	0.170837	0.057735	0.0333333	0.000245818	0.00323465	APT	***	4.12496	Up		0	0	0	0	6	8	3	4	15	11
0.137504	0.237504	0.137504	2.80735	2.32193	1.58496	1.58496	2	1.58496	TGME49_245680	APT	1.9807	0.503983	0.20575	RH	0.170837	0.057735	0.0333333	0.000259727	0.00336428	APT	***	3.53532	Up		0	0	0	0	6	4	2	2	3	2
0.137504	0.237504	0.137504	2.32193	3.32193	1.58496	2	3	2.80735	TGME49_310250	APT	2.50603	0.654036	0.267009	RH	0.170837	0.057735	0.0333333	0.000288172	0.0036753	APT	***	3.87471	Up		3	0	0	0	4	9	2	3	7	6
1	0.237504	0.137504	3	3	2.58496	3.32193	4.90689	4.08746	TGME49_222020	APT	3.48354	0.859282	0.350801	RH	0.458336	0.471752	0.272366	0.000298299	0.00374681	APT	***	2.92608	Up	Phosphoglycerate kinase II	0	1	0	0	7	7	5	9	29	16
1	0.237504	0.137504	3.45943	3.58496	2.58496	2.32193	4.39232	4.32193	TGME49_305980	APT	3.44426	0.858739	0.350579	RH	0.458336	0.471752	0.272366	0.000322084	0.00398518	APT	***	2.90972	Up	PDH E3	0	1	0	0	10	11	5	4	20	19
0.137504	0.237504	0.137504	2.80735	2.58496	2	1.58496	3.32193	2	TGME49_247350	APT	2.3832	0.637604	0.260301	RH	0.170837	0.057735	0.0333333	0.000329261	0.00401408	APT	***	3.80221	Up		4	0	0	0	6	5	3	2	9	3
0.137504	0.237504	0.137504	3.45943	3.90689	2	3	3.45943	2	TGME49_261710	APT	2.97096	0.804928	0.32861	RH	0.170837	0.057735	0.0333333	0.000339574	0.00407981	APT	***	4.12024	Up		0	0	0	0	10	14	3	7	10	3
0.137504	0.237504	0.137504	3.16993	3.70044	2	2.58496	4.08746	2.32193	TGME49_260550	APT	2.97745	0.816217	0.333219	RH	0.170837	0.057735	0.0333333	0.00035979	0.0042563	APT	***	4.12339	Up		0	0	0	0	8	12	3	5	16	4
0.137504	0.237504	0.137504	4	5.16993	2.58496	3.90689	5.08746	2.80735	TGME49_273800	APT	3.9261	1.09105	0.445419	RH	0.170837	0.057735	0.0333333	0.000369634	0.0042563	APT	***	4.52241	Up		0	0	0	0	15	35	5	14	33	6
0.137504	0.237504	0.137504	2.32193	2	1	2	2.58496	2.32193	TGME49_212210	APT	2.03814	0.555109	0.226622	RH	0.170837	0.057735	0.0333333	0.000369667	0.0042563	APT	***	3.57656	Up		0	0	0	0	4	3	1	3	5	4
0.137504	0.237504	0.137504	2.80735	2.58496	1.58496	1.58496	3.16993	2.32193	TGME49_205030	APT	2.34235	0.649255	0.265057	RH	0.170837	0.057735	0.0333333	0.00039503	0.00445013	APT	***	3.77727	Up		1	0	0	0	6	5	2	2	8	4
0.137504	0.237504	0.137504	3.16993	3.16993	1.58496	2.32193	3.80735	3.45943	TGME49_249340	APT	2.91892	0.817719	0.333832	RH	0.170837	0.057735	0.0333333	0.000401681	0.00445013	APT	***	4.09474	Up		1	0	0	0	8	8	2	4	13	10
0.137504	0.237504	0.137504	3.70044	4.16993	2	2.58496	3.16993	2.32193	TGME49_269980	APT	2.9912	0.839022	0.342529	RH	0.170837	0.057735	0.0333333	0.000402605	0.00445013	APT	***	4.13003	Up		8	0	0	0	12	17	3	5	8	4
0.137504	0.237504	0.137504	3.58496	3.45943	1.58496	3	3.80735	2.32193	TGME49_246080	APT	2.95977	0.855276	0.349165	RH	0.170837	0.057735	0.0333333	0.000466606	0.00508969	APT	***	4.1148	Up		0	0	0	0	11	10	2	7	13	4
0.137504	0.237504	0.137504	3.32193	3.58496	2	3	4.52356	2.32193	TGME49_216810	APT	3.1254	0.90912	0.371147	RH	0.170837	0.057735	0.0333333	0.000477468	0.00514053	APT	***	4.19335	Up		0	0	0	0	9	11	3	7	22	4
0.137504	0.237504	0.137504	5.2854	5.24793	2.32193	3.45943	5.85798	4.52356	TGME49_288940	APT	4.44937	1.32908	0.542596	RH	0.170837	0.057735	0.0333333	0.000514046	0.00546338	APT	***	4.70291	Up		5	0	0	0	38	37	4	10	57	22
0.137504	0.237504	0.137504	3.16993	3	1.58496	2.58496	4.24793	2.80735	TGME49_319640	APT	2.89919	0.864514	0.352936	RH	0.170837	0.057735	0.0333333	0.000545774	0.00572717	APT	***	4.08496	Up		1	0	0	0	8	7	2	5	18	6
0.137504	0.237504	0.137504	2.80735	3.16993	1.58496	2	3	1.58496	TGME49_254580	APT	2.35787	0.720645	0.294202	RH	0.170837	0.057735	0.0333333	0.000641351	0.006646	APT	***	3.78679	Up	Non-apicoplast	8	0	0	0	6	8	2	3	7	2
0.137504	0.237504	0.137504	3	2.58496	1	2.32193	3	2.80735	TGME49_308090	APT	2.45237	0.7576	0.309289	RH	0.170837	0.057735	0.0333333	0.000670079	0.00685797	APT	***	3.84349	Up		0	0	0	0	7	5	1	4	7	6
0.137504	0.237504	0.137504	4	3.70044	1.58496	2.32193	4	3.45943	TGME49_286520	APT	3.17779	0.997411	0.407191	RH	0.170837	0.057735	0.0333333	0.000686789	0.00694327	APT	***	4.21733	Up		0	0	0	0	15	12	2	4	15	10
0.137504	0.237504	0.137504	3.45943	2.58496	1.58496	2	3.70044	3.45943	TGME49_223420	APT	2.7982	0.876702	0.357912	RH	0.170837	0.057735	0.0333333	0.000697868	0.00694438	APT	***	4.03381	Up		0	0	0	0	10	5	2	3	12	10
0.137504	0.237504	0.137504	2.32193	2.32193	1	2.32193	3.16993	2.32193	TGME49_240440	APT	2.24294	0.697016	0.284556	RH	0.170837	0.057735	0.0333333	0.000703653	0.00694438	APT	***	3.7147	Up		1	0	0	0	4	4	1	4	8	4
0.137504	0.237504	0.137504	4.39232	4.80735	1.58496	3.70044	4.9542	3.32193	TGME49_209250	APT	3.79353	1.25239	0.511285	RH	0.170837	0.057735	0.0333333	0.000845384	0.00824498	APT	***	4.47285	Up		1	0	0	0	20	27	2	12	30	9
0.137504	0.237504	0.137504	2.80735	3	1	2.80735	3.58496	2.80735	TGME49_226600	APT	2.66784	0.870807	0.355506	RH	0.170837	0.057735	0.0333333	0.000857815	0.00826894	APT	***	3.96498	Up		1	0	0	0	6	7	1	6	11	6
0.137504	0.237504	0.137504	4.52356	4.52356	1.58496	3.70044	4.85798	3	TGME49_238040	APT	3.69842	1.2378	0.505331	RH	0.170837	0.057735	0.0333333	0.000905338	0.00862063	APT	***	4.43622	Up		1	0	0	0	22	22	2	12	28	7
0.137504	0.237504	0.137504	3.70044	4.08746	1.58496	3.32193	5.20945	3.32193	TGME49_247195	APT	3.5377	1.18573	0.484072	RH	0.170837	0.057735	0.0333333	0.00091874	0.00862063	APT	***	4.37212	Up		1	0	0	0	12	16	2	9	36	9
0.137504	0.237504	0.137504	2.32193	2.80735	1.58496	1.58496	3.70044	2.58496	TGME49_253880	APT	2.43077	0.802531	0.327632	RH	0.170837	0.057735	0.0333333	0.000925496	0.00862063	APT	***	3.83072	Up		9	0	0	0	4	6	2	2	12	5
0.137504	0.237504	0.137504	2.80735	2.80735	1.58496	2	4.24793	3.16993	TGME49_312110	APT	2.76959	0.932117	0.380535	RH	0.170837	0.057735	0.0333333	0.000983899	0.0090628	APT	***	4.01898	Up	Atrx	0	0	0	0	6	6	2	3	18	8
0.137504	0.237504	0.137504	2.58496	3.16993	1	2.32193	3.32193	2.32193	TGME49_233680	APT	2.45345	0.828492	0.338231	RH	0.170837	0.057735	0.0333333	0.00102828	0.00936754	APT	**	3.84412	Up		0	0	0	0	5	8	1	4	9	4
0.137504	0.237504	0.137504	3.45943	3.32193	1	2.32193	3.16993	2.80735	TGME49_238950	APT	2.68009	0.919396	0.375342	RH	0.170837	0.057735	0.0333333	0.00108479	0.0097657	APT	**	3.97159	Up		14	0	0	0	10	9	1	4	8	6
0.137504	0.237504	0.137504	3.80735	4.80735	2	3.16993	5.42626	2.80735	TGME49_226960	APT	3.66971	1.27907	0.522176	RH	0.170837	0.057735	0.0333333	0.00109555	0.0097657	APT	**	4.42497	Up		0	0	0	0	13	27	3	8	42	6
0.137504	0.237504	0.137504	1.58496	2.32193	1	1.58496	2	1	TGME49_224620	APT	1.58198	0.52909	0.216	RH	0.170837	0.057735	0.0333333	0.00111587	0.0097842	APT	**	3.21104	Up		4	0	0	0	2	4	1	2	3	1
0.137504	0.237504	0.137504	2	3.32193	1.58496	2.58496	4.08746	2.32193	TGME49_268430	APT	2.65021	0.915036	0.373562	RH	0.170837	0.057735	0.0333333	0.00112123	0.0097842	APT	**	3.95541	Up		0	0	0	0	3	9	2	5	16	4
0.137504	0.237504	0.137504	2.80735	2.80735	2.32193	1.58496	4.32193	4.08746	TGME49_225990	APT	2.9885	1.04552	0.426834	RH	0.170837	0.057735	0.0333333	0.00116085	0.0100244	APT	**	4.12873	Up	FabD	1	0	0	0	6	6	4	2	19	16
0.137504	0.237504	0.137504	3.32193	3.16993	1	2.58496	3.90689	3	TGME49_240280	APT	2.83062	0.995498	0.40641	RH	0.170837	0.057735	0.0333333	0.00120396	0.0102895	APT	**	4.05043	Up		1	0	0	0	9	8	1	5	14	7
0.137504	0.237504	0.137504	2.80735	3	1	2.32193	3	1.58496	TGME49_305540	APT	2.28571	0.82921	0.338523	RH	0.170837	0.057735	0.0333333	0.00146879	0.0124248	APT	**	3.74195	Up		0	0	0	0	6	7	1	4	7	2
1	0.237504	0.137504	3.32193	3.16993	1.58496	2.32193	3.32193	2	TGME49_288720	APT	2.62011	0.752645	0.307266	RH	0.458336	0.471752	0.272366	0.00165197	0.0137488	APT	**	2.51515	Up		0	1	0	0	9	8	2	4	9	3
0.137504	0.237504	0.137504	2.58496	3.16993	1	2	3.70044	2.58496	TGME49_210380	APT	2.50671	0.938512	0.383146	RH	0.170837	0.057735	0.0333333	0.00165848	0.0137488	APT	**	3.87511	Up	Non-apicoplast	6	0	0	0	5	8	1	3	12	5
0.137504	0.237504	0.137504	2	2.80735	1	1.58496	2.80735	1.58496	TGME49_273540	APT	1.96411	0.726695	0.296672	RH	0.170837	0.057735	0.0333333	0.00168558	0.0138351	APT	**	3.52318	Up		8	0	0	0	3	6	1	2	6	2
0.137504	0.237504	0.137504	3.80735	3.80735	1	3.16993	4.64386	3	TGME49_247760	APT	3.23808	1.24054	0.506448	RH	0.170837	0.057735	0.0333333	0.00173471	0.0140988	APT	**	4.24445	Up		0	0	0	0	13	13	1	8	24	7
0.137504	0.237504	0.137504	2.80735	3.45943	1	2.58496	4.16993	2.58496	TGME49_275350	APT	2.76777	1.06187	0.433507	RH	0.170837	0.057735	0.0333333	0.00180938	0.0145629	APT	**	4.01803	Up		0	0	0	0	6	10	1	5	17	5
0.137504	0.237504	0.137504	3.90689	3.90689	1	3.80735	4.45943	2.58496	TGME49_212980	APT	3.27759	1.27566	0.520787	RH	0.170837	0.057735	0.0333333	0.00185911	0.0148192	APT	**	4.26194	Up		1	0	0	0	14	14	1	13	21	5
0.137504	0.237504	0.137504	4.08746	3.90689	1	2.80735	4.58496	3.16993	TGME49_229490	APT	3.25943	1.27901	0.522152	RH	0.170837	0.057735	0.0333333	0.00193152	0.0152498	APT	**	4.25393	Up		2	0	0	0	16	14	1	6	23	8
0.137504	0.237504	0.137504	2.80735	3.80735	1	2.80735	4.24793	2.58496	TGME49_283850	APT	2.87583	1.12811	0.460547	RH	0.170837	0.057735	0.0333333	0.00198364	0.0155136	APT	**	4.07329	Up		0	0	0	0	6	13	1	6	18	5
0.137504	0.237504	0.137504	2.80735	2.80735	1	1.58496	3.58496	2.32193	TGME49_257080	APT	2.35109	0.932957	0.380878	RH	0.170837	0.057735	0.0333333	0.00220351	0.017072	APT	**	3.78264	Up		6	0	0	0	6	6	1	2	11	4
0.137504	0.237504	0.137504	2.32193	2.32193	1	1	2.58496	1.58496	TGME49_289970	APT	1.8023	0.705293	0.287935	RH	0.170837	0.057735	0.0333333	0.00225423	0.0173033	APT	**	3.39915	Up		0	0	0	0	4	4	1	1	5	2
0.137504	0.237504	0.137504	2.80735	3.70044	1	2	3.32193	2	TGME49_235660	APT	2.47162	0.995616	0.406459	RH	0.170837	0.057735	0.0333333	0.00232567	0.0176879	APT	**	3.85477	Up		2	0	0	0	6	12	1	3	9	3
0.137504	0.237504	0.137504	3	3	1	2	4.24793	3	TGME49_318460	APT	2.70799	1.09961	0.448913	RH	0.170837	0.057735	0.0333333	0.00235355	0.0177372	APT	**	3.98653	Up		9	0	0	0	7	7	1	3	18	7
0.137504	0.237504	0.137504	3.32193	4	1	2.32193	4.16993	2.58496	TGME49_205130	APT	2.89979	1.18694	0.484567	RH	0.170837	0.057735	0.0333333	0.00239872	0.0179148	APT	**	4.08526	Up		0	0	0	0	9	15	1	4	17	5
0.137504	0.237504	0.137504	2.80735	3.32193	1	1.58496	3.70044	2.80735	TGME49_311080	APT	2.53701	1.03775	0.42366	RH	0.170837	0.057735	0.0333333	0.00247448	0.0183156	APT	**	3.89244	Up	apicoplast	10	0	0	0	6	9	1	2	12	6
0.137504	0.237504	0.137504	3.45943	3.58496	1	2.32193	4.45943	2.58496	TGME49_256980	APT	2.90179	1.20477	0.491846	RH	0.170837	0.057735	0.0333333	0.00255601	0.0187516	APT	**	4.08625	Up		4	0	0	0	10	11	1	4	21	5
0.137504	0.237504	0.137504	2.80735	3	1	1.58496	3.90689	2.80735	TGME49_246460	APT	2.51776	1.04916	0.428317	RH	0.170837	0.057735	0.0333333	0.00269482	0.0195966	APT	**	3.88145	Up		2	0	0	0	6	7	1	2	14	6
0.137504	0.237504	0.137504	2.32193	2.58496	1	2	4.08746	3.32193	TGME49_208560	APT	2.55271	1.06938	0.436572	RH	0.170837	0.057735	0.0333333	0.00274907	0.0198172	APT	**	3.90134	Up	Non-apicoplast	1	0	0	0	4	5	1	3	16	9
0.137504	0.237504	0.137504	2.80735	3.90689	1	2.80735	5.08746	3	TGME49_206450	APT	3.10151	1.3559	0.553545	RH	0.170837	0.057735	0.0333333	0.00316357	0.0226057	APT	**	4.18228	Up		0	0	0	0	6	14	1	6	33	7
0.137504	0.237504	0.137504	3.16993	3.58496	1	2.32193	4.75489	2.58496	TGME49_295650	APT	2.90278	1.26697	0.517237	RH	0.170837	0.057735	0.0333333	0.00319043	0.0226057	APT	**	4.08674	Up		0	0	0	0	8	11	1	4	26	5
0.137504	0.237504	0.137504	3.16993	3.16993	1	2.58496	3.16993	1	TGME49_257520	APT	2.34912	1.0693	0.436541	RH	0.170837	0.057735	0.0333333	0.00406098	0.0285301	APT	**	3.78143	Up		1	0	0	0	8	8	1	5	8	1
0.137504	0.237504	0.137504	2.32193	2.58496	1	2	1	1	TGME49_292130	APT	1.65115	0.736971	0.300867	RH	0.170837	0.057735	0.0333333	0.0042294	0.0292181	APT	**	3.27278	Up		0	0	0	0	4	5	1	3	1	1
0.137504	0.237504	0.137504	2	2.32193	1	1	2.58496	1	TGME49_315210	APT	1.65115	0.736971	0.300867	RH	0.170837	0.057735	0.0333333	0.0042294	0.0292181	APT	**	3.27278	Up		7	0	0	0	3	4	1	1	5	1
3	2.1	2.32193	4.52356	5.08746	3.16993	3.70044	5.04439	3.90689	TGME49_286420	APT	4.23878	0.773665	0.315847	RH	2.47398	0.46887	0.270702	0.00468246	0.0320806	APT	**	0.776817	NoSignificance		0	7	3	4	22	33	8	12	32	14
0.137504	0.237504	0.137504	2	2	1	1	2.80735	1	TGME49_242660	APT	1.63456	0.755055	0.30825	RH	0.170837	0.057735	0.0333333	0.00493819	0.0335554	APT	**	3.25821	Up		0	0	0	0	3	3	1	1	6	1
0.137504	0.237504	0.137504	2	2	0.137504	1.58496	1.58496	1.58496	TGME49_284560	APT	1.48207	0.689365	0.281432	RH	0.170837	0.057735	0.0333333	0.00532266	0.0358739	APT	**	3.11692	Up		0	0	0	0	3	3	0	2	2	2
0.137504	0.237504	0.137504	2.58496	3.16993	0.137504	2.80735	3.32193	2.32193	TGME49_203390	APT	2.3906	1.16339	0.474951	RH	0.170837	0.057735	0.0333333	0.00538655	0.0360117	APT	**	3.80668	Up		0	0	0	0	5	8	0	6	9	4
0.137504	0.237504	0.137504	4.9542	5.78136	1	4.9542	5.67243	2	TGME49_230000	APT	4.06036	2.03811	0.832053	RH	0.170837	0.057735	0.0333333	0.0054341	0.036039	APT	**	4.57092	Up		0	0	0	0	30	54	1	30	50	3
0.137504	0.237504	0.137504	1.58496	1.58496	1	1	2.80735	1	TGME49_273070	APT	1.49621	0.703353	0.287143	RH	0.170837	0.057735	0.0333333	0.00554766	0.0365001	APT	**	3.13062	Up		0	0	0	0	2	2	1	1	6	1
0.137504	0.237504	0.137504	3.16993	3.58496	0.137504	2.58496	4	3.16993	TGME49_236040	APT	2.77455	1.37558	0.561578	RH	0.170837	0.057735	0.0333333	0.00559384	0.0365141	APT	**	4.02156	Up		1	0	0	0	8	11	0	5	15	8
0.137504	0.237504	0.137504	2	2.58496	1	1	2.80735	1	TGME49_301440	APT	1.73205	0.844184	0.344636	RH	0.170837	0.057735	0.0333333	0.00607092	0.0393187	APT	**	3.34179	Up		0	0	0	0	3	5	1	1	6	1
0.137504	0.237504	0.137504	2.32193	2.58496	0.137504	2.58496	2.58496	1.58496	TGME49_319550	APT	1.96655	0.976178	0.398523	RH	0.170837	0.057735	0.0333333	0.00624677	0.0400846	APT	**	3.52497	Up	Non-apicoplast	6	0	0	0	4	5	0	5	5	2
0.137504	0.237504	0.137504	3.80735	4.32193	0.137504	3.45943	4.39232	2.58496	TGME49_310080	APT	3.11725	1.60204	0.654029	RH	0.170837	0.057735	0.0333333	0.00632522	0.0400846	APT	**	4.18958	Up		0	0	0	0	13	19	0	10	20	5
0.137504	0.237504	0.137504	2	2.32193	1	2	3.70044	1	TGME49_205470	APT	2.00373	0.999505	0.408046	RH	0.170837	0.057735	0.0333333	0.00633423	0.0400846	APT	**	3.552	Up		0	0	0	0	3	4	1	3	12	1
0.137504	0.237504	0.137504	2.32193	2.58496	1	1	3.80735	3.58496	TGME49_201270	APT	2.3832	1.21189	0.494752	RH	0.170837	0.057735	0.0333333	0.00649051	0.0402932	APT	**	3.80221	Up	hypothetical protein	0	0	0	0	4	5	1	1	13	11
1	0.237504	0.137504	2.80735	2.58496	1.58496	1.58496	2.32193	1.58496	TGME49_280740	APT	2.07819	0.561734	0.229327	RH	0.458336	0.471752	0.272366	0.00654281	0.0402932	APT	**	2.18085	Up		1	1	0	0	6	5	2	2	4	2
0.137504	0.237504	0.137504	3	3	1	1	4.32193	3	TGME49_270220	APT	2.55365	1.30783	0.533921	RH	0.170837	0.057735	0.0333333	0.00655486	0.0402932	APT	**	3.90187	Up	Non-apicoplast	7	0	0	0	7	7	1	1	19	7
0.137504	0.237504	0.137504	3	3.58496	1	2	3.58496	1	TGME49_202190	APT	2.36165	1.20328	0.491238	RH	0.170837	0.057735	0.0333333	0.00656163	0.0402932	APT	**	3.78911	Up		0	0	0	0	7	11	1	3	11	1
0.137504	0.237504	0.137504	2.32193	2.58496	0.137504	1.58496	2.32193	1.58496	TGME49_267100	APT	1.75604	0.895072	0.365411	RH	0.170837	0.057735	0.0333333	0.00729238	0.0443777	APT	**	3.36164	Up		0	0	0	0	4	5	0	2	4	2
0.137504	0.237504	0.137504	2.58496	3.32193	0.137504	2	3.80735	3	TGME49_226580	APT	2.47529	1.30151	0.531341	RH	0.170837	0.057735	0.0333333	0.00737721	0.0443777	APT	**	3.85691	Up		1	0	0	0	5	9	0	3	13	7
0.137504	0.237504	0.137504	2.80735	2.32193	1.58496	2	2.80735	0.137504	TGME49_239540	APT	1.94318	1.0029	0.409433	RH	0.170837	0.057735	0.0333333	0.00738736	0.0443777	APT	**	3.50773	Up		2	0	0	0	6	4	2	3	6	0
0.137504	0.237504	0.137504	2	2.80735	0.137504	2	3.16993	2	TGME49_304710	APT	2.01913	1.04759	0.427678	RH	0.170837	0.057735	0.0333333	0.00744726	0.0444157	APT	**	3.56304	Up		0	0	0	0	3	6	0	3	8	3
0.137504	0.237504	0.137504	2	1.58496	0.137504	1	1.58496	1.58496	TGME49_218520	APT	1.3154	0.659331	0.269171	RH	0.170837	0.057735	0.0333333	0.00779957	0.0461846	APT	**	2.94481	Up		1	0	0	0	3	2	0	1	2	2
1	0.237504	0.137504	2.32193	2	1	1.58496	3.32193	2	TGME49_276140	APT	2.03814	0.776487	0.317	RH	0.458336	0.471752	0.272366	0.00815326	0.0474268	APT	**	2.15277	Up		0	1	0	0	4	3	1	2	9	3
1.58496	0.237504	0.137504	3.58496	3.70044	3	3.16993	4.58496	4.32193	TGME49_233500	APT	3.72704	0.624465	0.254937	RH	0.653323	0.808371	0.466713	0.00819137	0.0474268	APT	**	2.51216	Up	Triosephosphate isomerase II	0	2	0	0	11	12	7	8	23	19
0.137504	0.237504	0.137504	1.58496	1	0.137504	1	1.58496	1.58496	TGME49_249310	APT	1.14873	0.572314	0.233646	RH	0.170837	0.057735	0.0333333	0.00824474	0.0474268	APT	**	2.74935	Up		0	0	0	0	2	1	0	1	2	2
0.137504	0.237504	0.137504	1	1.58496	0.137504	1	1.58496	1.58496	TGME49_300060	APT	1.14873	0.572314	0.233646	RH	0.170837	0.057735	0.0333333	0.00824474	0.0474268	APT	**	2.74935	Up		1	0	0	0	1	2	0	1	2	2
0.137504	0.237504	0.137504	2.58496	3	0.137504	2	4.08746	3.58496	TGME49_231640	APT	2.56582	1.39713	0.570374	RH	0.170837	0.057735	0.0333333	0.00843155	0.0474268	APT	**	3.90873	Up		0	0	0	0	5	7	0	3	16	11
0.137504	0.237504	0.137504	1.58496	1	0.137504	1	1	1	TGME49_216820	APT	0.953744	0.463302	0.189142	RH	0.170837	0.057735	0.0333333	0.00846703	0.0474268	APT	**	2.48098	Up	Non-apicoplast	11	0	0	0	2	1	0	1	1	1
0.137504	0.237504	0.137504	1	1	0.137504	1	1.58496	1	TGME49_209940	APT	0.953744	0.463302	0.189142	RH	0.170837	0.057735	0.0333333	0.00846703	0.0474268	APT	**	2.48098	Up	apicoplast	8	0	0	0	1	1	0	1	2	1
0.137504	0.237504	0.137504	1	1	0.137504	1	1.58496	1	TGME49_233760	APT	0.953744	0.463302	0.189142	RH	0.170837	0.057735	0.0333333	0.00846703	0.0474268	APT	**	2.48098	Up	Non-apicoplast	7	0	0	0	1	1	0	1	2	1
0.137504	0.237504	0.137504	2.80735	2.80735	0.137504	2	3.32193	1.58496	TGME49_206320	APT	2.10985	1.15064	0.469748	RH	0.170837	0.057735	0.0333333	0.00900474	0.0499457	APT	**	3.62645	Up		2	0	0	0	6	6	0	3	9	2
0.137504	0.237504	0.137504	2.32193	1.58496	1	1	3.80735	3.32193	TGME49_256840	APT	2.1727	1.19256	0.48686	RH	0.170837	0.057735	0.0333333	0.00915408	0.0499457	APT	**	3.66879	Up		0	0	0	0	4	2	1	1	13	9
0.137504	0.237504	0.137504	2.58496	1.58496	1.58496	1.58496	2.58496	0.137504	TGME49_218730	APT	1.67705	0.899361	0.367163	RH	0.170837	0.057735	0.0333333	0.00917132	0.0499457	APT	**	3.29524	Up		2	0	0	0	5	2	2	2	5	0
0.137504	0.237504	0.137504	1.58496	1.58496	0.137504	1	1	1	TGME49_262670	APT	1.05124	0.531509	0.216988	RH	0.170837	0.057735	0.0333333	0.00931815	0.0499457	APT	**	2.6214	Up		0	0	0	0	2	2	0	1	1	1
0.137504	0.237504	0.137504	1	1.58496	0.137504	1	1.58496	1	TGME49_215775	APT	1.05124	0.531509	0.216988	RH	0.170837	0.057735	0.0333333	0.00931815	0.0499457	APT	**	2.6214	Up		1	0	0	0	1	2	0	1	2	1
0.137504	0.237504	0.137504	1	1.58496	0.137504	1	1.58496	1	TGME49_266070	APT	1.05124	0.531509	0.216988	RH	0.170837	0.057735	0.0333333	0.00931815	0.0499457	APT	**	2.6214	Up		0	0	0	0	1	2	0	1	2	1
0.137504	0.237504	0.137504	2.32193	2	0.137504	1.58496	3	1.58496	TGME49_267810	APT	1.77156	0.959576	0.391745	RH	0.170837	0.057735	0.0333333	0.00933847	0.0499457	APT	**	3.37433	Up		0	0	0	0	4	3	0	2	7	2
0.137504	0.237504	0.137504	2.32193	2	0.137504	1	2.32193	2	TGME49_230590	APT	1.63023	0.878154	0.358505	RH	0.170837	0.057735	0.0333333	0.0094548	0.0500904	APT	**	3.25438	Up		2	0	0	0	4	3	0	1	4	3
0.137504	0.237504	0.137504	2.80735	2	0.137504	2	3.90689	2.58496	TGME49_290970	APT	2.23945	1.2454	0.508432	RH	0.170837	0.057735	0.0333333	0.0095596	0.0500904	APT	**	3.71245	Up		0	0	0	0	6	3	0	3	14	5
0.137504	0.237504	0.137504	3	3.32193	0.137504	2.80735	4.58496	2	TGME49_259720	APT	2.64196	1.48846	0.607662	RH	0.170837	0.057735	0.0333333	0.00960442	0.0500904	APT	**	3.95092	Up		0	0	0	0	7	9	0	6	23	3
0.137504	0.237504	0.137504	3.32193	3.58496	0.137504	2	3.80735	2	TGME49_278870	APT	2.47529	1.3885	0.566851	RH	0.170837	0.057735	0.0333333	0.00960721	0.0500904	APT	**	3.85691	Up		0	0	0	0	9	11	0	3	13	3
0.137504	0.237504	0.137504	2.32193	3	0.137504	2	4.08746	2.32193	TGME49_318710	APT	2.31147	1.30012	0.530773	RH	0.170837	0.057735	0.0333333	0.00990958	0.051344	APT	**	3.75812	Up		0	0	0	0	4	7	0	3	16	4
0.137504	0.237504	0.137504	2.32193	2.58496	0.137504	1.58496	3.16993	1.58496	TGME49_312660	APT	1.89737	1.05497	0.430688	RH	0.170837	0.057735	0.0333333	0.0101104	0.0514633	APT	*	3.47331	Up		2	0	0	0	4	5	0	2	8	2
1	1.1	0.137504	2.80735	2.58496	1.58496	2.32193	3.32193	1.58496	TGME49_248880	APT	2.36768	0.68971	0.281573	RH	0.745835	0.529197	0.305532	0.0101146	0.0514633	APT	*	1.66655	Up		0	1	1	0	6	5	2	4	9	2
0.137504	0.237504	0.137504	2.32193	2	0.137504	1.58496	1.58496	1	TGME49_228470	APT	1.43823	0.777625	0.317464	RH	0.170837	0.057735	0.0333333	0.0101809	0.0514633	APT	*	3.0736	Up		0	0	0	0	4	3	0	2	2	1
0.137504	0.237504	0.137504	1.58496	2.32193	0.137504	1.58496	2	1	TGME49_268200	APT	1.43823	0.777625	0.317464	RH	0.170837	0.057735	0.0333333	0.0101809	0.0514633	APT	*	3.0736	Up		0	0	0	0	2	4	0	2	3	1
0.137504	0.237504	0.137504	3.58496	2.58496	0.137504	1.58496	4	3.16993	TGME49_212130	APT	2.51039	1.43535	0.585981	RH	0.170837	0.057735	0.0333333	0.0103322	0.0517322	APT	*	3.87722	Up		2	0	0	0	11	5	0	2	15	8
0.137504	0.237504	0.137504	2.32193	2	0.137504	1	2.58496	2	TGME49_233540	APT	1.67407	0.924912	0.377594	RH	0.170837	0.057735	0.0333333	0.0103589	0.0517322	APT	*	3.29266	Up	apicoplast	11	0	0	0	4	3	0	1	5	3
0.137504	0.237504	0.137504	2	2.32193	0.137504	1	2.32193	1.58496	TGME49_286190	APT	1.56105	0.859346	0.350827	RH	0.170837	0.057735	0.0333333	0.0105281	0.0519513	APT	*	3.19183	Up		1	0	0	0	3	4	0	1	4	2
0.137504	0.237504	0.137504	2.32193	1.58496	0.137504	1	2.32193	2	TGME49_226430	APT	1.56105	0.859346	0.350827	RH	0.170837	0.057735	0.0333333	0.0105281	0.0519513	APT	*	3.19183	Up		3	0	0	0	4	2	0	1	4	3
1	0.237504	0.137504	3.45943	3.45943	0.137504	2	3.70044	3	TGME49_239100	APT	2.62613	1.36147	0.555818	RH	0.458336	0.471752	0.272366	0.010638	0.0521827	APT	*	2.51846	Up		0	1	0	0	10	10	0	3	12	7
0.137504	0.237504	0.137504	2.32193	3	0.137504	1.58496	1.58496	1.58496	TGME49_243410	APT	1.70239	0.954762	0.38978	RH	0.170837	0.057735	0.0333333	0.0109248	0.0532396	APT	*	3.31687	Up		0	0	0	0	4	7	0	2	2	2
1	0.237504	0.137504	3.58496	3.16993	0.137504	2	3.45943	2.80735	TGME49_244560	APT	2.52653	1.30139	0.53129	RH	0.458336	0.471752	0.272366	0.0109819	0.0532396	APT	*	2.46268	Up		1	1	0	0	11	8	0	3	10	6
0.137504	0.237504	0.137504	2.58496	2.58496	0.137504	1	2.58496	2	TGME49_280610	APT	1.8154	1.02869	0.419959	RH	0.170837	0.057735	0.0333333	0.0110934	0.0534674	APT	*	3.4096	Up		0	0	0	0	5	5	0	1	5	3
0.137504	0.237504	0.137504	2.32193	2	0.137504	1	2.80735	2.32193	TGME49_272290	APT	1.76479	0.999604	0.408086	RH	0.170837	0.057735	0.0333333	0.0111999	0.0536688	APT	*	3.3688	Up	PDH E1 beta	0	0	0	0	4	3	0	1	6	4
0.137504	0.237504	0.137504	1.58496	2.32193	0.137504	1	2.32193	1.58496	TGME49_319740	APT	1.49188	0.833255	0.340175	RH	0.170837	0.057735	0.0333333	0.0113995	0.0543116	APT	*	3.12644	Up	Negtive	7	0	0	0	2	4	0	1	4	2
0.137504	0.237504	0.137504	2.80735	2.80735	0.137504	1.58496	4.39232	3.32193	TGME49_267800	APT	2.50857	1.47402	0.601764	RH	0.170837	0.057735	0.0333333	0.0115187	0.0545659	APT	*	3.87617	Up		0	0	0	0	6	6	0	2	20	9
0.137504	0.237504	0.137504	2.32193	2.58496	0.137504	1.58496	2	1	TGME49_246610	APT	1.60489	0.911077	0.371946	RH	0.170837	0.057735	0.0333333	0.0117618	0.0554006	APT	*	3.23179	Up		1	0	0	0	4	5	0	2	3	1
0.137504	0.237504	0.137504	3.16993	3.32193	0.137504	1.58496	4.85798	3.32193	TGME49_231370	APT	2.73237	1.64041	0.669694	RH	0.170837	0.057735	0.0333333	0.0122559	0.05672	APT	*	3.99946	Up		1	0	0	0	8	9	0	2	28	9
0.137504	0.237504	0.137504	2.58496	2.32193	0.137504	1	3	2	TGME49_233220	APT	1.84073	1.07355	0.438274	RH	0.170837	0.057735	0.0333333	0.0123709	0.05672	APT	*	3.42959	Up		2	0	0	0	5	4	0	1	7	3
0.137504	0.237504	0.137504	2	2.58496	0.137504	1	3	2.32193	TGME49_269480	APT	1.84073	1.07355	0.438274	RH	0.170837	0.057735	0.0333333	0.0123709	0.05672	APT	*	3.42959	Up		0	0	0	0	3	5	0	1	7	4
0.137504	0.237504	0.137504	2	1.58496	0.137504	1	2	1	TGME49_229930	APT	1.28708	0.719944	0.293916	RH	0.170837	0.057735	0.0333333	0.012384	0.05672	APT	*	2.91341	Up		0	0	0	0	3	2	0	1	3	1
0.137504	0.237504	0.137504	2	2	0.137504	1	1.58496	1	TGME49_232550	APT	1.28708	0.719944	0.293916	RH	0.170837	0.057735	0.0333333	0.012384	0.05672	APT	*	2.91341	Up		0	0	0	0	3	3	0	1	2	1
0.137504	0.237504	0.137504	2.80735	2.80735	0.137504	1.58496	3.58496	1.58496	TGME49_299110	APT	2.08452	1.23177	0.502868	RH	0.170837	0.057735	0.0333333	0.0124599	0.0567233	APT	*	3.60902	Up		5	0	0	0	6	6	0	2	11	2
1	0.237504	0.137504	1.58496	2	1	1.58496	2.80735	2	TGME49_262560	APT	1.82955	0.603657	0.246442	RH	0.458336	0.471752	0.272366	0.0125216	0.0567233	APT	*	1.99701	Up		0	1	0	0	2	3	1	2	6	3
0.137504	0.237504	0.137504	1.58496	2.58496	0.137504	1	2.58496	2.32193	TGME49_258580	APT	1.70239	0.989718	0.404051	RH	0.170837	0.057735	0.0333333	0.0126026	0.0567801	APT	*	3.31687	Up		0	0	0	0	2	5	0	1	5	4
0.137504	0.237504	0.137504	1.58496	1.58496	0.137504	1.58496	3.16993	2.58496	TGME49_313310	APT	1.77455	1.03842	0.423934	RH	0.170837	0.057735	0.0333333	0.0127148	0.0569759	APT	*	3.37676	Up		0	0	0	0	2	2	0	2	8	5
0.137504	0.237504	0.137504	1.58496	2.58496	0.137504	1	2.32193	1.58496	TGME49_220270	APT	1.53572	0.890605	0.363588	RH	0.170837	0.057735	0.0333333	0.0130553	0.0579141	APT	*	3.16822	Up		0	0	0	0	2	5	0	1	4	2
0.137504	0.237504	0.137504	2.32193	2.32193	0.137504	1	2.80735	1.58496	TGME49_260630	APT	1.69561	0.994418	0.40597	RH	0.170837	0.057735	0.0333333	0.0130639	0.0579141	APT	*	3.31112	Up		3	0	0	0	4	4	0	1	6	2
0.137504	0.237504	0.137504	1	2.32193	1	1.58496	4.32193	2	TGME49_230400	APT	2.03814	1.23762	0.505256	RH	0.170837	0.057735	0.0333333	0.0139621	0.0613733	APT	*	3.57656	Up		0	0	0	0	1	4	1	2	19	3
0.137504	0.237504	0.137504	2.58496	3.16993	0.137504	2.58496	3.58496	1	TGME49_253430	APT	2.17705	1.33011	0.543016	RH	0.170837	0.057735	0.0333333	0.0139922	0.0613733	APT	*	3.67169	Up		0	0	0	0	5	8	0	5	11	1
0.137504	0.237504	0.137504	2.80735	2.80735	0.137504	1.58496	2.58496	1	TGME49_262620	APT	1.82036	1.10393	0.450679	RH	0.170837	0.057735	0.0333333	0.0144687	0.0628408	APT	*	3.41353	Up		0	0	0	0	6	6	0	2	5	1
0.137504	0.237504	0.137504	1.58496	1.58496	1	1	4	3.45943	TGME49_227420	APT	2.10489	1.2968	0.529416	RH	0.170837	0.057735	0.0333333	0.0146077	0.0628408	APT	*	3.62306	Up		0	0	0	0	2	2	1	1	15	10
0.137504	0.237504	0.137504	2.32193	2	1	1	2	0.137504	TGME49_263300	APT	1.40991	0.834657	0.340747	RH	0.170837	0.057735	0.0333333	0.0147461	0.0628408	APT	*	3.04491	Up		0	0	0	0	4	3	1	1	3	0
0.137504	0.237504	0.137504	2	2.32193	0.137504	1	2	1	TGME49_227360	APT	1.40991	0.834657	0.340747	RH	0.170837	0.057735	0.0333333	0.0147461	0.0628408	APT	*	3.04491	Up		0	0	0	0	3	4	0	1	3	1
0.137504	0.237504	0.137504	2.32193	2	0.137504	1	2	1	TGME49_300380	APT	1.40991	0.834657	0.340747	RH	0.170837	0.057735	0.0333333	0.0147461	0.0628408	APT	*	3.04491	Up		1	0	0	0	4	3	0	1	3	1
0.137504	0.237504	0.137504	3.16993	3.16993	0.137504	1	3.16993	2	TGME49_321660	APT	2.10788	1.30424	0.532455	RH	0.170837	0.057735	0.0333333	0.0148447	0.0628408	APT	*	3.6251	Up		6	0	0	0	8	8	0	1	8	3
0.137504	0.237504	0.137504	2	2	0.137504	1	3	1.58496	TGME49_262610	APT	1.62041	0.977407	0.399025	RH	0.170837	0.057735	0.0333333	0.0148574	0.0628408	APT	*	3.24567	Up	Non-apicoplast	7	0	0	0	3	3	0	1	7	2
0.137504	0.237504	0.137504	2	1.58496	1	0.137504	2.32193	1	TGME49_293730	APT	1.34073	0.792084	0.323367	RH	0.170837	0.057735	0.0333333	0.0150159	0.0631886	APT	*	2.97233	Up		2	0	0	0	3	2	1	0	4	1
0.137504	0.237504	0.137504	2	2.58496	0.137504	2	3.32193	1	TGME49_205380	APT	1.84073	1.13193	0.46211	RH	0.170837	0.057735	0.0333333	0.0152015	0.0636465	APT	*	3.42959	Up		0	0	0	0	3	5	0	3	9	1
0.137504	0.237504	0.137504	2	1	0.137504	1	1	1	TGME49_250870	APT	1.02292	0.590042	0.240884	RH	0.170837	0.057735	0.0333333	0.0161968	0.067473	APT	*	2.582	Up		4	0	0	0	3	1	0	1	1	1
1	0.237504	0.137504	3.58496	3.58496	0.137504	1.58496	3.90689	2.58496	TGME49_288380	APT	2.56404	1.46526	0.59819	RH	0.458336	0.471752	0.272366	0.0163019	0.0675712	APT	*	2.48394	Up		0	1	0	0	11	11	0	2	14	5
0.137504	0.237504	0.137504	3.45943	4.32193	0.137504	3.32193	4.58496	1	TGME49_249390	APT	2.80429	1.8187	0.742482	RH	0.170837	0.057735	0.0333333	0.0163948	0.0676182	APT	*	4.03695	Up		0	0	0	0	10	19	0	9	23	1
0.137504	0.237504	0.137504	1.58496	1.58496	0.137504	2	3	1	TGME49_229650	APT	1.55124	0.959696	0.391794	RH	0.170837	0.057735	0.0333333	0.0166919	0.0685031	APT	*	3.18273	Up		0	0	0	0	2	2	0	3	7	1
0.137504	0.237504	0.137504	1	2	0.137504	1	2	1	TGME49_267050	APT	1.18958	0.71109	0.290301	RH	0.170837	0.057735	0.0333333	0.0168179	0.06868	APT	*	2.79977	Up		0	0	0	0	1	3	0	1	3	1
0.137504	0.237504	0.137504	2.32193	2.58496	0.137504	1.58496	3.32193	1	TGME49_209450	APT	1.82521	1.15336	0.470856	RH	0.170837	0.057735	0.0333333	0.0169178	0.0687494	APT	*	3.41737	Up		0	0	0	0	4	5	0	2	9	1
0.137504	0.237504	0.137504	2	1	0.137504	1.58496	2.58496	1	TGME49_226020	APT	1.38457	0.861489	0.351701	RH	0.170837	0.057735	0.0333333	0.0180089	0.0717548	APT	*	3.01875	Up	Non-apicoplast	12	0	0	0	3	1	0	2	5	1
0.137504	0.237504	0.137504	1.58496	2	0.137504	1	2.58496	1	TGME49_201780	APT	1.38457	0.861489	0.351701	RH	0.170837	0.057735	0.0333333	0.0180089	0.0717548	APT	*	3.01875	Up		1	0	0	0	2	3	0	1	5	1
0.137504	0.237504	0.137504	3.80735	3.70044	0.137504	1	4.24793	2.32193	TGME49_310220	APT	2.53586	1.67695	0.684613	RH	0.170837	0.057735	0.0333333	0.0180915	0.0717548	APT	*	3.89178	Up		0	0	0	0	13	12	0	1	18	4
0.137504	0.237504	0.137504	2.32193	2.58496	0.137504	1	4.16993	3.16993	TGME49_214180	APT	2.23071	1.461	0.596452	RH	0.170837	0.057735	0.0333333	0.0180932	0.0717548	APT	*	3.70681	Up		0	0	0	0	4	5	0	1	17	8
0.137504	0.237504	0.137504	2.58496	2.58496	0.137504	1	3.90689	2	TGME49_238390	APT	2.03572	1.32528	0.541043	RH	0.170837	0.057735	0.0333333	0.0182092	0.0717548	APT	*	3.57485	Up	Non-apicoplast	10	0	0	0	5	5	0	1	14	3
1.58496	0.237504	0.137504	2.80735	3	1	2	5.24793	4.45943	TGME49_321640	APT	3.08579	1.56052	0.637079	RH	0.653323	0.808371	0.466713	0.0182556	0.0717548	APT	*	2.23977	Up	Cdc48Ap	1	2	0	0	6	7	1	3	37	21
0.137504	0.237504	0.137504	2.80735	2	0.137504	1	3.32193	1.58496	TGME49_258180	APT	1.80862	1.16797	0.47682	RH	0.170837	0.057735	0.0333333	0.0184225	0.0717548	APT	*	3.4042	Up		1	0	0	0	6	3	0	1	9	2
0.137504	0.237504	0.137504	1.58496	1	0.137504	1	2.58496	1.58496	TGME49_267530	APT	1.3154	0.817742	0.333842	RH	0.170837	0.057735	0.0333333	0.0184364	0.0717548	APT	*	2.94481	Up		0	0	0	0	2	1	0	1	5	2
0.137504	0.237504	0.137504	1.58496	1.58496	0.137504	1	2.58496	1	TGME49_295080	APT	1.3154	0.817742	0.333842	RH	0.170837	0.057735	0.0333333	0.0184364	0.0717548	APT	*	2.94481	Up		0	0	0	0	2	2	0	1	5	1
0.137504	0.237504	0.137504	2.58496	3	0.137504	1	4.58496	3.70044	TGME49_204060	APT	2.50131	1.66594	0.680116	RH	0.170837	0.057735	0.0333333	0.0186463	0.0722328	APT	*	3.87199	Up		1	0	0	0	5	7	0	1	23	12
0.137504	0.237504	0.137504	3	3.16993	0.137504	1	4.45943	2.32193	TGME49_203780	APT	2.34813	1.56607	0.639346	RH	0.170837	0.057735	0.0333333	0.0190706	0.0733004	APT	*	3.78082	Up		0	0	0	0	7	8	0	1	21	4
2.32193	0.237504	0.137504	5.32193	5.55459	4.45943	4.85798	5.93074	5.12928	TGME49_273760	APT	5.20899	0.518558	0.2117	RH	0.898978	1.23332	0.71206	0.0190988	0.0733004	APT	*	2.53465	Up		0	4	0	0	39	46	21	28	60	34
2	0.237504	1	2.80735	2.58496	3	3	4.70044	4.39232	TGME49_293590	APT	3.41418	0.895561	0.365611	RH	1.07917	0.883911	0.510326	0.0192381	0.0734947	APT	*	1.66162	Up	FabB/F	1	3	0	1	6	5	7	7	25	20
0.137504	0.237504	0.137504	2	3.16993	0.137504	1.58496	3.32193	1	TGME49_232250	APT	1.86905	1.23729	0.505123	RH	0.170837	0.057735	0.0333333	0.0199598	0.075902	APT	*	3.45162	Up		0	0	0	0	3	8	0	2	9	1
0.137504	0.237504	0.137504	2.32193	2.58496	0.137504	1	2.80735	1	TGME49_216680	APT	1.64196	1.07679	0.439597	RH	0.170837	0.057735	0.0333333	0.0202693	0.07669	APT	*	3.26473	Up		1	0	0	0	4	5	0	1	6	1
1	0.237504	0.137504	2.80735	3.16993	0.137504	2	3.70044	1.58496	TGME49_313670	APT	2.23336	1.28269	0.523655	RH	0.458336	0.471752	0.272366	0.020352	0.07669	APT	*	2.28474	Up		0	1	0	0	6	8	0	3	12	2
0.137504	0.237504	0.137504	3.58496	3.45943	0.137504	1	2.58496	1.58496	TGME49_248390	APT	2.05864	1.38598	0.565825	RH	0.170837	0.057735	0.0333333	0.0205505	0.0770877	APT	*	3.591	Up		0	0	0	0	11	10	0	1	5	2
0.137504	0.237504	0.137504	1.58496	2	0.137504	1.58496	3.32193	1	TGME49_237210	APT	1.60489	1.06059	0.432983	RH	0.170837	0.057735	0.0333333	0.0210518	0.0786122	APT	*	3.23179	Up		0	0	0	0	2	3	0	2	9	1
0.137504	0.237504	0.137504	1.58496	2	0.137504	1	3.58496	2	TGME49_213392	APT	1.7179	1.15549	0.471727	RH	0.170837	0.057735	0.0333333	0.021845	0.0812084	APT	*	3.32996	Up		0	0	0	0	2	3	0	1	11	3
0.137504	0.237504	0.137504	1	3.16993	0.137504	1.58496	3.16993	1.58496	TGME49_232440	APT	1.77455	1.20382	0.491456	RH	0.170837	0.057735	0.0333333	0.0222563	0.0823682	APT	*	3.37676	Up		0	0	0	0	1	8	0	2	8	2
0.137504	0.237504	0.137504	3.58496	3.90689	0.137504	1.58496	2.58496	1	TGME49_235470	APT	2.13321	1.48494	0.606223	RH	0.170837	0.057735	0.0333333	0.0229512	0.0842958	APT	*	3.64234	Up		0	0	0	0	11	14	0	2	5	1
0.137504	1.68496	0.137504	3.80735	4	2.80735	3	2.80735	2.58496	TGME49_245460	APT	3.16784	0.588096	0.240089	RH	0.653323	0.893426	0.51582	0.0229805	0.0842958	APT	*	2.27763	Up		0	0	2	0	13	15	6	7	6	5
0.137504	0.237504	0.137504	1.58496	2	0.137504	1.58496	4	1.58496	TGME49_311400	APT	1.8154	1.24749	0.509287	RH	0.170837	0.057735	0.0333333	0.023125	0.084452	APT	*	3.4096	Up		0	0	0	0	2	3	0	2	15	2
0.137504	0.237504	0.137504	1.58496	1.58496	1	1	4.75489	4.08746	TGME49_253650	APT	2.33538	1.65025	0.67371	RH	0.170837	0.057735	0.0333333	0.0235934	0.0857847	APT	*	3.77297	Up		1	0	0	0	2	2	1	1	26	16
0.137504	0.237504	0.137504	2	2.58496	0.137504	1	3.16993	1	TGME49_254120	APT	1.64873	1.13485	0.463302	RH	0.170837	0.057735	0.0333333	0.0241441	0.0874036	APT	*	3.27067	Up		0	0	0	0	3	5	0	1	8	1
1.58496	0.237504	0.137504	2	2.32193	2.32193	1.58496	3.90689	3.58496	TGME49_273960	APT	2.62011	0.918764	0.375084	RH	0.653323	0.808371	0.466713	0.0243602	0.0878026	APT	*	2.00376	Up	Chaperonin 20	0	2	0	0	3	4	4	2	14	11
0.137504	0.237504	0.137504	1	2.32193	0.137504	1	2.58496	1	TGME49_216650	APT	1.34073	0.928107	0.378898	RH	0.170837	0.057735	0.0333333	0.0270552	0.0970941	APT	*	2.97233	Up		0	0	0	0	1	4	0	1	5	1
0.137504	0.237504	0.137504	1.58496	1.58496	0.137504	0.137504	1.58496	1.58496	TGME49_243390	APT	1.10248	0.747465	0.305151	RH	0.170837	0.057735	0.0333333	0.0280635	0.0996026	APT	*	2.69006	Up		2	0	0	0	2	2	0	0	2	2
0.137504	0.237504	0.137504	1.58496	1.58496	0.137504	0.137504	1.58496	1.58496	TGME49_232230	APT	1.10248	0.747465	0.305151	RH	0.170837	0.057735	0.0333333	0.0280635	0.0996026	APT	*	2.69006	Up		0	0	0	0	2	2	0	0	2	2
2.58496	0.237504	0.137504	4	4.08746	3.70044	3.45943	5.85798	5.67243	TGME49_275690	APT	4.46296	1.03467	0.422403	RH	0.986657	1.38508	0.799674	0.0281146	0.0996026	APT	*	2.17738	Up		0	5	0	0	15	16	12	10	57	50
0.137504	0.237504	0.137504	1	2	0.137504	1	2.80735	1	TGME49_236110	APT	1.32414	0.935951	0.3821	RH	0.170837	0.057735	0.0333333	0.0293016	0.103366	APT	*	2.95437	Up		0	0	0	0	1	3	0	1	6	1
0.137504	0.237504	0.137504	1.58496	1.58496	0.137504	0.137504	2	1.58496	TGME49_203310	APT	1.17165	0.817014	0.333545	RH	0.170837	0.057735	0.0333333	0.0298621	0.104897	APT	*	2.77785	Up		2	0	0	0	2	2	0	0	3	2
0.137504	0.237504	0.137504	2	1.58496	0.137504	0.137504	2	1.58496	TGME49_236650	APT	1.24082	0.87455	0.357034	RH	0.170837	0.057735	0.0333333	0.030015	0.104989	APT	*	2.86061	Up		0	0	0	0	3	2	0	0	3	2
0.137504	0.237504	0.137504	3.58496	3.90689	0.137504	1	3.32193	1	TGME49_294740	APT	2.15855	1.62566	0.663674	RH	0.170837	0.057735	0.0333333	0.0302139	0.105241	APT	*	3.65937	Up		0	0	0	0	11	14	0	1	9	1
0.137504	0.237504	0.137504	2	2	0.137504	0.137504	2.32193	1.58496	TGME49_254370	APT	1.36365	0.978165	0.399334	RH	0.170837	0.057735	0.0333333	0.030397	0.105435	APT	*	2.99678	Up		19	0	0	0	3	3	0	0	4	2
0.137504	0.237504	0.137504	3	2.32193	0.137504	0.137504	3.32193	2.32193	TGME49_292340	APT	1.87347	1.39975	0.571445	RH	0.170837	0.057735	0.0333333	0.0307393	0.106179	APT	*	3.45502	Up		2	0	0	0	7	4	0	0	9	4
0.137504	0.237504	0.137504	1	1.58496	0.137504	1	3.16993	3.16993	TGME49_321570	APT	1.67705	1.24522	0.508358	RH	0.170837	0.057735	0.0333333	0.0313162	0.10756	APT	*	3.29524	Up	FabZ	0	0	0	0	1	2	0	1	8	8
0.137504	0.237504	0.137504	1	2.32193	0.137504	1	3.45943	1.58496	TGME49_230690	APT	1.58397	1.16929	0.477362	RH	0.170837	0.057735	0.0333333	0.0313987	0.10756	APT	*	3.21285	Up		0	0	0	0	1	4	0	1	10	2
0.137504	0.237504	0.137504	3.16993	3	0.137504	1	4.16993	1	TGME49_203910	APT	2.07956	1.58166	0.645709	RH	0.170837	0.057735	0.0333333	0.0316038	0.107817	APT	*	3.60559	Up		0	0	0	0	8	7	0	1	17	1
0.137504	0.237504	0.137504	2.32193	2.32193	0.137504	0.137504	2.58496	1.58496	TGME49_261430	APT	1.5148	1.11776	0.456325	RH	0.170837	0.057735	0.0333333	0.0319451	0.108092	APT	*	3.14843	Up	Non-apicoplast	9	0	0	0	4	4	0	0	5	2
0.137504	0.237504	0.137504	2.32193	2.32193	0.137504	0.137504	2.58496	1.58496	TGME49_318160	APT	1.5148	1.11776	0.456325	RH	0.170837	0.057735	0.0333333	0.0319451	0.108092	APT	*	3.14843	Up		1	0	0	0	4	4	0	0	5	2
0.137504	0.237504	0.137504	1	3.58496	0.137504	2.32193	3.90689	1	TGME49_289650	APT	1.99188	1.53104	0.625046	RH	0.170837	0.057735	0.0333333	0.0332023	0.111473	APT	*	3.54344	Up		0	0	0	0	1	11	0	4	14	1
5	0.137504	0.237504	0.137504	0.137504	0.137504	0.137504	0.137504	3	2.58496	TGME49_255690	APT	1.0225	1.37729	0.562277	RH	0.170837	0.057735	0.0333333	0.190537	0.310167	APT	ns	2.5814	2C-methyl-D-erythritol 2	4- cyclodiphosphate synthase domain-containing protein (Sethu)	1	0	0	0	0	0	0	0	7
1	0.237504	0.137504	1.58496	2	0.137504	1.58496	3.58496	2.32193	TGME49_270510	APT	1.86905	1.12483	0.459212	RH	0.458336	0.471752	0.272366	0.0334106	0.111473	APT	*	2.02783	Up		0	1	0	0	2	3	0	2	11	4
0.137504	0.237504	0.137504	1.58496	1	1	0.137504	3.58496	2.58496	TGME49_289360	APT	1.64873	1.2454	0.508432	RH	0.170837	0.057735	0.0333333	0.0334311	0.111473	APT	*	3.27067	Up		1	0	0	0	2	1	1	0	11	5
0.137504	0.237504	0.137504	1.58496	1.58496	0.137504	0.137504	2.32193	1.58496	TGME49_312622	APT	1.2253	0.889637	0.363193	RH	0.170837	0.057735	0.0333333	0.0334821	0.111473	APT	*	2.84245	Up	Non-apicoplast	10	0	0	0	2	2	0	0	4	2
0.137504	0.237504	0.137504	1.58496	1.58496	0.137504	1	1.58496	0.137504	TGME49_267430	APT	1.00498	0.709111	0.289494	RH	0.170837	0.057735	0.0333333	0.0342677	0.11273	APT	*	2.55648	Up		4	0	0	0	2	2	0	1	2	0
0.137504	0.237504	0.137504	1.58496	1.58496	0.137504	0.137504	1.58496	1	TGME49_215785	APT	1.00498	0.709111	0.289494	RH	0.170837	0.057735	0.0333333	0.0342677	0.11273	APT	*	2.55648	Up		1	0	0	0	2	2	0	0	2	1
0.137504	0.237504	0.137504	1.58496	1.58496	0.137504	1	1.58496	0.137504	TGME49_240860	APT	1.00498	0.709111	0.289494	RH	0.170837	0.057735	0.0333333	0.0342677	0.11273	APT	*	2.55648	Up		1	0	0	0	2	2	0	1	2	0
0.137504	0.237504	0.137504	2	2.80735	0.137504	0.137504	2	1.58496	TGME49_209600	APT	1.44455	1.08727	0.443875	RH	0.170837	0.057735	0.0333333	0.0348938	0.114336	APT	*	3.07993	Up		0	0	0	0	3	6	0	0	3	2
0.137504	0.237504	0.137504	1.58496	2	0.137504	0.137504	2.58496	1.58496	TGME49_216020	APT	1.33832	0.999752	0.408147	RH	0.170837	0.057735	0.0333333	0.0352492	0.115046	APT	*	2.96973	Up		0	0	0	0	2	3	0	0	5	2
0.137504	0.237504	0.137504	3	3	0.137504	0.137504	3.16993	1.58496	TGME49_305520	APT	1.83832	1.4368	0.58657	RH	0.170837	0.057735	0.0333333	0.0360603	0.117224	APT	*	3.42769	Up		0	0	0	0	7	7	0	0	8	2
1.58496	0.237504	0.137504	1.58496	1.58496	2.32193	2	3.32193	3.58496	TGME49_264080	APT	2.39979	0.865882	0.353495	RH	0.653323	0.808371	0.466713	0.0362573	0.117224	APT	*	1.87704	Up	ACP	1	2	0	0	2	2	4	3	9	11
0.137504	0.237504	0.137504	2.80735	3.16993	0.137504	0.137504	3.16993	1.58496	TGME49_281980	APT	1.83453	1.43771	0.586942	RH	0.170837	0.057735	0.0333333	0.0364127	0.117224	APT	*	3.42472	Up		7	0	0	0	6	8	0	0	8	2
1.58496	0.237504	0.137504	2.80735	3	1	1.58496	3.70044	2.32193	TGME49_266960	APT	2.40245	0.984624	0.401971	RH	0.653323	0.808371	0.466713	0.0364822	0.117224	APT	*	1.87864	Up		0	2	0	0	6	7	1	2	12	4
0.137504	0.237504	0.137504	2.58496	2	0.137504	0.137504	4	3.32193	TGME49_313540	APT	2.03032	1.61381	0.658836	RH	0.170837	0.057735	0.0333333	0.0369512	0.117755	APT	*	3.57101	Up		1	0	0	0	5	3	0	0	15	9
0.137504	0.237504	0.137504	3	2.80735	0.137504	1.58496	3.45943	0.137504	TGME49_247510	APT	1.85446	1.46729	0.599019	RH	0.170837	0.057735	0.0333333	0.0374558	0.117755	APT	*	3.44031	Up		0	0	0	0	7	6	0	2	10	0
0.137504	0.237504	0.137504	3.32193	3.16993	0.137504	2.58496	1.58496	0.137504	TGME49_289690	APT	1.8228	1.44084	0.588219	RH	0.170837	0.057735	0.0333333	0.037552	0.117755	APT	*	3.41546	Up		0	0	0	0	9	8	0	5	2	0
0.137504	0.237504	0.137504	1	2.58496	0.137504	1	3.16993	1	TGME49_266640	APT	1.48207	1.14632	0.467984	RH	0.170837	0.057735	0.0333333	0.0378072	0.117755	APT	*	3.11692	Up		0	0	0	0	1	5	0	1	8	1
2	1.1	0.137504	3.70044	3.58496	2	2.80735	3.32193	3.70044	TGME49_289750	APT	3.18585	0.67185	0.274282	RH	1.07917	0.931423	0.537757	0.0379252	0.117755	APT	*	1.56176	Up		0	3	1	0	12	11	3	6	9	12
0.137504	0.237504	0.137504	1.58496	2	0.137504	0.137504	1.58496	1	TGME49_241160	APT	1.07416	0.79236	0.323479	RH	0.170837	0.057735	0.0333333	0.0381297	0.117755	APT	*	2.65251	Up		7	0	0	0	2	3	0	0	2	1
0.137504	0.237504	0.137504	1.58496	1.58496	0.137504	1	2	0.137504	TGME49_291300	APT	1.07416	0.79236	0.323479	RH	0.170837	0.057735	0.0333333	0.0381297	0.117755	APT	*	2.65251	Up		2	0	0	0	2	2	0	1	3	0
0.137504	0.237504	0.137504	1	1.58496	0.137504	0.137504	2	1.58496	TGME49_316260	APT	1.07416	0.79236	0.323479	RH	0.170837	0.057735	0.0333333	0.0381297	0.117755	APT	*	2.65251	Up	Non-apicoplast	7	0	0	0	1	2	0	0	3	2
0.137504	0.237504	0.137504	2.80735	1.58496	0.137504	0.137504	1.58496	2.32193	TGME49_288650	APT	1.42904	1.10288	0.45025	RH	0.170837	0.057735	0.0333333	0.0381338	0.117755	APT	*	3.06435	Up		1	0	0	0	6	2	0	0	2	4
0.137504	0.237504	0.137504	1.58496	2.58496	0.137504	0.137504	3.16993	2	TGME49_277910	APT	1.60248	1.25481	0.512276	RH	0.170837	0.057735	0.0333333	0.0381477	0.117755	APT	*	3.22961	Up		1	0	0	0	2	5	0	0	8	3
0.137504	0.237504	0.137504	2.32193	2.58496	0.137504	0.137504	3.45943	1.58496	TGME49_267590	APT	1.70438	1.35362	0.552614	RH	0.170837	0.057735	0.0333333	0.0390565	0.117755	APT	*	3.31856	Up		3	0	0	0	4	5	0	0	10	2
0.137504	0.237504	0.137504	1.58496	1	0.137504	0.137504	1	1.58496	TGME49_320020	APT	0.907489	0.651278	0.265883	RH	0.170837	0.057735	0.0333333	0.0390622	0.117755	APT	*	2.40926	Up	Non-apicoplast	12	0	0	0	2	1	0	0	1	2
0.137504	0.237504	0.137504	1.58496	1	0.137504	0.137504	1.58496	1	TGME49_249300	APT	0.907489	0.651278	0.265883	RH	0.170837	0.057735	0.0333333	0.0390622	0.117755	APT	*	2.40926	Up		2	0	0	0	2	1	0	0	2	1
0.137504	0.237504	0.137504	1.58496	1.58496	0.137504	0.137504	1	1	TGME49_269150	APT	0.907489	0.651278	0.265883	RH	0.170837	0.057735	0.0333333	0.0390622	0.117755	APT	*	2.40926	Up		4	0	0	0	2	2	0	0	1	1
0.137504	0.237504	0.137504	1.58496	1	0.137504	0.137504	1	1.58496	TGME49_262960	APT	0.907489	0.651278	0.265883	RH	0.170837	0.057735	0.0333333	0.0390622	0.117755	APT	*	2.40926	Up		0	0	0	0	2	1	0	0	1	2
0.137504	0.237504	0.137504	1	1.58496	0.137504	0.137504	1.58496	1	TGME49_313230	APT	0.907489	0.651278	0.265883	RH	0.170837	0.057735	0.0333333	0.0390622	0.117755	APT	*	2.40926	Up		0	0	0	0	1	2	0	0	2	1
0.137504	0.237504	0.137504	1	1.58496	0.137504	1.58496	1	0.137504	TGME49_244110	APT	0.907489	0.651278	0.265883	RH	0.170837	0.057735	0.0333333	0.0390622	0.117755	APT	*	2.40926	Up		0	0	0	0	1	2	0	2	1	0
0.137504	0.237504	0.137504	2	1.58496	0.137504	0.137504	2	1	TGME49_244550	APT	1.14333	0.861014	0.351507	RH	0.170837	0.057735	0.0333333	0.0393536	0.118203	APT	*	2.74255	Up		1	0	0	0	3	2	0	0	3	1
0.137504	0.237504	0.137504	1	1.58496	0.137504	1	1	0.137504	TGME49_214440	APT	0.809995	0.568044	0.231903	RH	0.170837	0.057735	0.0333333	0.039681	0.118753	APT	*	2.24529	Up		0	0	0	0	1	2	0	1	1	0
0.137504	0.237504	0.137504	1.58496	2.58496	0.137504	0.137504	3.32193	2	TGME49_242070	APT	1.62781	1.29372	0.528159	RH	0.170837	0.057735	0.0333333	0.0398231	0.118753	APT	*	3.25224	Up		0	0	0	0	2	5	0	0	9	3
0.137504	0.237504	0.137504	1.58496	1.58496	0.137504	0.137504	3	2.32193	TGME49_258826	APT	1.46114	1.15271	0.470593	RH	0.170837	0.057735	0.0333333	0.0406054	0.120627	APT	*	3.09641	Up		1	0	0	0	2	2	0	0	7	4
0.137504	0.237504	0.137504	2	2	0.137504	0.137504	2.32193	1	TGME49_269390	APT	1.26616	0.980843	0.400427	RH	0.170837	0.057735	0.0333333	0.0408882	0.120627	APT	*	2.88976	Up		0	0	0	0	3	3	0	0	4	1
0.137504	0.237504	0.137504	2	2	0.137504	0.137504	2.32193	1	TGME49_268720	APT	1.26616	0.980843	0.400427	RH	0.170837	0.057735	0.0333333	0.0408882	0.120627	APT	*	2.88976	Up		4	0	0	0	3	3	0	0	4	1
0.137504	0.237504	0.137504	1.58496	1.58496	0.137504	0.137504	2.80735	1.58496	TGME49_250790	APT	1.30621	1.0216	0.417065	RH	0.170837	0.057735	0.0333333	0.0415434	0.122126	APT	*	2.93469	Up		0	0	0	0	2	2	0	0	6	2
0.137504	0.237504	0.137504	2.32193	2.32193	0.137504	1	2	0.137504	TGME49_275568	APT	1.31981	1.03625	0.423049	RH	0.170837	0.057735	0.0333333	0.0418642	0.122202	APT	*	2.94964	Up		10	0	0	0	4	4	0	1	3	0
0.137504	0.237504	0.137504	2.32193	2.32193	0.137504	0.137504	2	1	TGME49_236640	APT	1.31981	1.03625	0.423049	RH	0.170837	0.057735	0.0333333	0.0418642	0.122202	APT	*	2.94964	Up		2	0	0	0	4	4	0	0	3	1
1	1.1	1	1.58496	2	1.58496	2	1	1	TGME49_309590	APT	1.52832	0.449361	0.183451	RH	1.03333	0.057735	0.0333333	0.0424632	0.122862	APT	*	0.564642	NoSignificance		0	1	1	1	2	3	2	3	1	1
0.137504	0.237504	0.137504	2.32193	2.58496	0.137504	0.137504	5.08746	3.80735	TGME49_309370	APT	2.34612	1.97301	0.805477	RH	0.170837	0.057735	0.0333333	0.0427202	0.122862	APT	*	3.77959	Up		0	0	0	0	4	5	0	0	33	13
0.137504	0.237504	0.137504	2	1.58496	0.137504	0.137504	2.32193	1	TGME49_304990	APT	1.19698	0.932165	0.380555	RH	0.170837	0.057735	0.0333333	0.0428313	0.122862	APT	*	2.80871	Up		4	0	0	0	3	2	0	0	4	1
0.137504	0.237504	0.137504	1.58496	1	0.137504	0.137504	2.32193	2	TGME49_306030	APT	1.19698	0.932165	0.380555	RH	0.170837	0.057735	0.0333333	0.0428313	0.122862	APT	*	2.80871	Up		0	0	0	0	2	1	0	0	4	3
0.137504	0.237504	0.137504	2	2.32193	0.137504	1	1.58496	0.137504	TGME49_207060	APT	1.19698	0.932165	0.380555	RH	0.170837	0.057735	0.0333333	0.0428313	0.122862	APT	*	2.80871	Up		0	0	0	0	3	4	0	1	2	0
0.137504	0.237504	0.137504	1.58496	2.32193	0.137504	0.137504	3.70044	2.32193	TGME49_217890	APT	1.70071	1.39078	0.567784	RH	0.170837	0.057735	0.0333333	0.0430047	0.122934	APT	*	3.31545	Up		0	0	0	0	2	4	0	0	12	4
0.137504	0.237504	0.137504	1	1	1	1	4.80735	4.16993	TGME49_240600	APT	2.16288	1.81277	0.740059	RH	0.170837	0.057735	0.0333333	0.0431711	0.122986	APT	*	3.66226	Up	CPN60	1	0	0	0	1	1	1	1	27	17
0.137504	0.237504	0.137504	1.58496	1.58496	0.137504	0.137504	2.32193	1	TGME49_283730	APT	1.12781	0.874259	0.356915	RH	0.170837	0.057735	0.0333333	0.0436071	0.123791	APT	*	2.72283	Up	Non-apicoplast	10	0	0	0	2	2	0	0	4	1
0.137504	0.237504	0.137504	2	2	0.137504	1	2.58496	0.137504	TGME49_213910	APT	1.30999	1.04147	0.425179	RH	0.170837	0.057735	0.0333333	0.0437525	0.123791	APT	*	2.93887	Up		2	0	0	0	3	3	0	1	5	0
2	1.68496	0.137504	3.80735	4	2	2.80735	4	3.45943	TGME49_248340	APT	3.34569	0.797872	0.32573	RH	1.27416	0.996893	0.575556	0.044759	0.126208	APT	*	1.39276	Up		0	3	2	0	13	15	3	6	15	10
0.137504	0.237504	0.137504	2.58496	2.58496	0.137504	1	2.80735	0.137504	TGME49_246220	APT	1.54205	1.26615	0.516903	RH	0.170837	0.057735	0.0333333	0.0452051	0.126953	APT	*	3.17416	Up		2	0	0	0	5	5	0	1	6	0
0.137504	0.237504	0.137504	2.32193	2.80735	0.137504	1	2.58496	0.137504	TGME49_288800	APT	1.49821	1.22676	0.500821	RH	0.170837	0.057735	0.0333333	0.0453293	0.126953	APT	*	3.13255	Up		0	0	0	0	4	6	0	1	5	0
1.58496	0.237504	0.137504	2	2.32193	1	1.58496	3.45943	3.32193	TGME49_313640	APT	2.28138	0.967295	0.394896	RH	0.653323	0.808371	0.466713	0.045766	0.127744	APT	*	1.80403	Up		1	2	0	0	3	4	1	2	10	9
1	0.237504	0.137504	2.32193	2	1	2	1.58496	0.137504	TGME49_214770	APT	1.5074	0.811031	0.331102	RH	0.458336	0.471752	0.272366	0.0466184	0.127765	APT	*	1.71758	Up		0	1	0	0	4	3	1	3	2	0
0.137504	0.237504	0.137504	1.58496	2	0.137504	0.137504	1	1	TGME49_314810	APT	0.976662	0.751893	0.306959	RH	0.170837	0.057735	0.0333333	0.0466288	0.127765	APT	*	2.51524	Up		0	0	0	0	2	3	0	0	1	1
0.137504	0.237504	0.137504	1	1.58496	0.137504	1	2	0.137504	TGME49_223600	APT	0.976662	0.751893	0.306959	RH	0.170837	0.057735	0.0333333	0.0466288	0.127765	APT	*	2.51524	Up	Non-apicoplast	9	0	0	0	1	2	0	1	3	0
0.137504	0.237504	0.137504	1	2	0.137504	1	1.58496	0.137504	TGME49_239870	APT	0.976662	0.751893	0.306959	RH	0.170837	0.057735	0.0333333	0.0466288	0.127765	APT	*	2.51524	Up		0	0	0	0	1	3	0	1	2	0
0.137504	0.237504	0.137504	2.58496	2	0.137504	0.137504	1.58496	1	TGME49_255260	APT	1.24082	0.999411	0.408008	RH	0.170837	0.057735	0.0333333	0.0468521	0.127765	APT	*	2.86061	Up		1	0	0	0	5	3	0	0	2	1
0.137504	0.237504	0.137504	2	1.58496	0.137504	0.137504	2.58496	1	TGME49_278660	APT	1.24082	0.999411	0.408008	RH	0.170837	0.057735	0.0333333	0.0468521	0.127765	APT	*	2.86061	Up	Non-apicoplast	8	0	0	0	3	2	0	0	5	1
0.137504	0.237504	0.137504	2	2.58496	0.137504	1	1.58496	0.137504	TGME49_224850	APT	1.24082	0.999411	0.408008	RH	0.170837	0.057735	0.0333333	0.0468521	0.127765	APT	*	2.86061	Up		0	0	0	0	3	5	0	1	2	0
0.137504	0.237504	0.137504	1.58496	2	0.137504	0.137504	4	3.16993	TGME49_286630	APT	1.83832	1.56984	0.640883	RH	0.170837	0.057735	0.0333333	0.048098	0.130732	APT	*	3.42769	Up		1	0	0	0	2	3	0	0	15	8
0.137504	0.237504	0.137504	1.58496	3	0.137504	0.137504	4.08746	2	TGME49_240510	APT	1.82457	1.56735	0.639867	RH	0.170837	0.057735	0.0333333	0.0491209	0.133076	APT	*	3.41687	Up		0	0	0	0	2	7	0	0	16	3
0.137504	0.237504	0.137504	1	2	0.137504	0.137504	2	1	TGME49_266060	APT	1.04583	0.83369	0.340353	RH	0.170837	0.057735	0.0333333	0.0498519	0.134179	APT	*	2.61396	Up		0	0	0	0	1	3	0	0	3	1
0.137504	0.237504	0.137504	1	2	0.137504	1	2	0.137504	TGME49_233720	APT	1.04583	0.83369	0.340353	RH	0.170837	0.057735	0.0333333	0.0498519	0.134179	APT	*	2.61396	Up		0	0	0	0	1	3	0	1	3	0
0.137504	0.237504	0.137504	2.32193	2	1	0.137504	3.16993	0.137504	TGME49_244840	APT	1.46114	1.23838	0.505567	RH	0.170837	0.057735	0.0333333	0.0510673	0.137006	APT	ns	3.09641	NoSignificance		0	0	0	0	4	3	1	0	8	0
0.137504	0.237504	0.137504	1	1	0.137504	1	3.90689	2.58496	TGME49_247000	APT	1.60489	1.37918	0.563047	RH	0.170837	0.057735	0.0333333	0.0514061	0.13747	APT	ns	3.23179	NoSignificance		1	0	0	0	1	1	0	1	14	5
1.58496	0.237504	0.137504	2.58496	2.80735	0.137504	2	3.16993	2.80735	TGME49_263040	APT	2.25118	1.10498	0.451105	RH	0.653323	0.808371	0.466713	0.0522971	0.138733	APT	ns	1.78481	NoSignificance		0	2	0	0	5	6	0	3	8	6
0.137504	0.237504	0.137504	2	3	0.137504	1	3.16993	0.137504	TGME49_205740	APT	1.57416	1.35783	0.55433	RH	0.170837	0.057735	0.0333333	0.0523806	0.138733	APT	ns	3.20389	NoSignificance		1	0	0	0	3	7	0	1	8	0
0.137504	0.237504	0.137504	1	3	0.137504	2	3.16993	0.137504	TGME49_243710	APT	1.57416	1.35783	0.55433	RH	0.170837	0.057735	0.0333333	0.0523806	0.138733	APT	ns	3.20389	NoSignificance		0	0	0	0	1	7	0	3	8	0
0.137504	0.237504	0.137504	2.32193	2	0.137504	0.137504	3.32193	1	TGME49_310270	APT	1.48648	1.28115	0.523026	RH	0.170837	0.057735	0.0333333	0.0534184	0.140499	APT	ns	3.12121	NoSignificance		0	0	0	0	4	3	0	0	9	1
0.137504	0.237504	0.137504	1	1	0.137504	0.137504	2	1	TGME49_290980	APT	0.879168	0.692849	0.282854	RH	0.170837	0.057735	0.0333333	0.0540643	0.140499	APT	ns	2.36352	NoSignificance		0	0	0	0	1	1	0	0	3	1
0.137504	0.237504	0.137504	1	1	0.137504	0.137504	2	1	TGME49_310950	APT	0.879168	0.692849	0.282854	RH	0.170837	0.057735	0.0333333	0.0540643	0.140499	APT	ns	2.36352	NoSignificance		0	0	0	0	1	1	0	0	3	1
0.137504	0.237504	0.137504	1	1	0.137504	1	2	0.137504	TGME49_219720	APT	0.879168	0.692849	0.282854	RH	0.170837	0.057735	0.0333333	0.0540643	0.140499	APT	ns	2.36352	NoSignificance		0	0	0	0	1	1	0	1	3	0
0.137504	0.237504	0.137504	1	1	0.137504	0.137504	2	1	TGME49_216860	APT	0.879168	0.692849	0.282854	RH	0.170837	0.057735	0.0333333	0.0540643	0.140499	APT	ns	2.36352	NoSignificance		0	0	0	0	1	1	0	0	3	1
0.137504	0.237504	0.137504	1	1	0.137504	0.137504	2	1	TGME49_207070	APT	0.879168	0.692849	0.282854	RH	0.170837	0.057735	0.0333333	0.0540643	0.140499	APT	ns	2.36352	NoSignificance		2	0	0	0	1	1	0	0	3	1
0.137504	0.237504	0.137504	1.58496	1.58496	0.137504	0.137504	3.70044	2	TGME49_290670	APT	1.52423	1.32783	0.542084	RH	0.170837	0.057735	0.0333333	0.0546669	0.140966	APT	ns	3.15739	NoSignificance		0	0	0	0	2	2	0	0	12	3
0.137504	0.237504	0.137504	2	1.58496	0.137504	1	3	0.137504	TGME49_285980	APT	1.30999	1.11834	0.45656	RH	0.170837	0.057735	0.0333333	0.0547541	0.140966	APT	ns	2.93887	NoSignificance		0	0	0	0	3	2	0	1	7	0
0.137504	0.237504	0.137504	1.58496	2	0.137504	1	3	0.137504	TGME49_293430	APT	1.30999	1.11834	0.45656	RH	0.170837	0.057735	0.0333333	0.0547541	0.140966	APT	ns	2.93887	NoSignificance		4	0	0	0	2	3	0	1	7	0
0.137504	0.237504	0.137504	1	1.58496	0.137504	0.137504	2.32193	1	TGME49_300290	APT	1.03032	0.845217	0.345058	RH	0.170837	0.057735	0.0333333	0.0550032	0.141169	APT	ns	2.5924	NoSignificance		1	0	0	0	1	2	0	0	4	1
0.137504	0.237504	0.137504	1	2	0.137504	0.137504	3.58496	2.80735	TGME49_200280	APT	1.61122	1.42792	0.582947	RH	0.170837	0.057735	0.0333333	0.0564322	0.14439	APT	ns	3.23746	NoSignificance		0	0	0	0	1	3	0	0	11	6
1	1.1	0.137504	3.16993	3.32193	1	1.58496	1.58496	1	TGME49_261570	APT	1.94363	1.04323	0.425898	RH	0.745835	0.529197	0.305532	0.0567297	0.144704	APT	ns	1.38183	NoSignificance		0	1	1	0	8	9	1	2	2	1
0.137504	0.237504	0.137504	1.58496	2.80735	0.137504	0.137504	3.16993	1	TGME49_252340	APT	1.47287	1.30103	0.531144	RH	0.170837	0.057735	0.0333333	0.0577959	0.146972	APT	ns	3.10794	NoSignificance	Non-apicoplast	11	0	0	0	2	6	0	0	8	1
0.137504	0.237504	0.137504	0.137504	1	0.137504	1	2.32193	2.32193	TGME49_263090	APT	1.15314	0.98408	0.401749	RH	0.170837	0.057735	0.0333333	0.0582215	0.147601	APT	ns	2.75488	NoSignificance		0	0	0	0	0	1	0	1	4	4
1	0.237504	0.137504	1	0.137504	1.58496	1.58496	3.80735	3.58496	TGME49_297940	APT	1.94996	1.45444	0.593774	RH	0.458336	0.471752	0.272366	0.0586132	0.148093	APT	ns	2.08897	NoSignificance		0	1	0	0	1	0	2	2	13	11
2	1.1	1	3.32193	3.45943	1	2.58496	3.80735	1.58496	TGME49_207440	APT	2.62644	1.12284	0.458397	RH	1.36667	0.550757	0.31798	0.0587729	0.148093	APT	ns	0.942447	NoSignificance		1	3	1	1	9	10	1	5	13	2
0.137504	0.237504	0.137504	1	2	0.137504	0.137504	2.58496	1	TGME49_253440	APT	1.14333	0.987588	0.403181	RH	0.170837	0.057735	0.0333333	0.0606535	0.152369	APT	ns	2.74255	NoSignificance		0	0	0	0	1	3	0	0	5	1
0.137504	0.237504	0.137504	1.58496	2.32193	0.137504	1	3.45943	0.137504	TGME49_220860	APT	1.44022	1.30104	0.531147	RH	0.170837	0.057735	0.0333333	0.0623643	0.155976	APT	ns	3.0756	NoSignificance		0	0	0	0	2	4	0	1	10	0
0.137504	0.237504	0.137504	1.58496	1	0.137504	0.137504	2.58496	1	TGME49_248100	APT	1.07416	0.928342	0.378994	RH	0.170837	0.057735	0.0333333	0.0628418	0.155976	APT	ns	2.65251	NoSignificance		1	0	0	0	2	1	0	0	5	1
0.137504	0.237504	0.137504	1	1.58496	0.137504	1	2.58496	0.137504	TGME49_309210	APT	1.07416	0.928342	0.378994	RH	0.170837	0.057735	0.0333333	0.0628418	0.155976	APT	ns	2.65251	NoSignificance		0	0	0	0	1	2	0	1	5	0
0.137504	0.237504	0.137504	0.137504	0.137504	1	1	2.58496	1.58496	TGME49_258090	APT	1.07416	0.928342	0.378994	RH	0.170837	0.057735	0.0333333	0.0628418	0.155976	APT	ns	2.65251	NoSignificance		0	0	0	0	0	0	1	1	5	2
0.137504	0.237504	0.137504	2.32193	1	0.137504	0.137504	4.52356	3.80735	TGME49_299080	APT	1.98798	1.88018	0.767582	RH	0.170837	0.057735	0.0333333	0.0641487	0.158744	APT	ns	3.54061	NoSignificance		2	0	0	0	4	1	0	0	22	13
1.58496	2.1	0.137504	3.80735	3.70044	1.58496	3.16993	3.90689	2.32193	TGME49_249900	APT	3.08192	0.939746	0.38365	RH	1.27416	1.0175	0.587452	0.0648519	0.160007	APT	ns	1.27429	NoSignificance		4	2	3	0	13	12	2	8	14	4
0.137504	0.237504	0.137504	1	2.80735	0.137504	0.137504	2	1	TGME49_232350	APT	1.18039	1.05443	0.430468	RH	0.170837	0.057735	0.0333333	0.0659156	0.161604	APT	ns	2.78858	NoSignificance		0	0	0	0	1	6	0	0	3	1
0.137504	0.237504	0.137504	1	2.32193	0.137504	1	2.80735	0.137504	TGME49_205320	APT	1.23405	1.11114	0.453621	RH	0.170837	0.057735	0.0333333	0.066035	0.161604	APT	ns	2.85271	NoSignificance		0	0	0	0	1	4	0	1	6	0
1	0.237504	1	2	2	0.137504	2	2	1.58496	TGME49_225080	APT	1.62041	0.745201	0.304227	RH	0.745835	0.440228	0.254165	0.0660841	0.161604	APT	ns	1.11943	NoSignificance		0	1	0	1	3	3	0	3	3	2
0.137504	0.237504	0.137504	1	1	0.137504	0.137504	2.32193	1	TGME49_249270	APT	0.932823	0.801027	0.327018	RH	0.170837	0.057735	0.0333333	0.0671656	0.163285	APT	ns	2.44898	NoSignificance		0	0	0	0	1	1	0	0	4	1
0.137504	0.237504	0.137504	1	1	0.137504	0.137504	2.32193	1	TGME49_203970	APT	0.932823	0.801027	0.327018	RH	0.170837	0.057735	0.0333333	0.0671656	0.163285	APT	ns	2.44898	NoSignificance		1	0	0	0	1	1	0	0	4	1
0.137504	0.237504	0.137504	1	1	0.137504	0.137504	2.80735	2.58496	TGME49_205700	APT	1.27789	1.16646	0.476204	RH	0.170837	0.057735	0.0333333	0.0676303	0.163934	APT	ns	2.90307	NoSignificance		1	0	0	0	1	1	0	0	6	5
0.137504	0.237504	0.137504	1.58496	1.58496	0.137504	0.137504	3.32193	1	TGME49_216620	APT	1.29448	1.18686	0.484535	RH	0.170837	0.057735	0.0333333	0.0681171	0.164633	APT	ns	2.92168	NoSignificance		7	0	0	0	2	2	0	0	9	1
1.58496	0.237504	0.137504	2.58496	2.80735	0.137504	1.58496	3.32193	2.32193	TGME49_221620	APT	2.12644	1.13052	0.461532	RH	0.653323	0.808371	0.466713	0.0686097	0.165341	APT	ns	1.70257	NoSignificance		0	2	0	0	5	6	0	2	9	4
2.32193	1.1	1	3.16993	3	2.32193	2.80735	3.16993	2.80735	TGME49_226970	APT	2.87941	0.317651	0.12968	RH	1.47398	0.736048	0.424958	0.0693197	0.166568	APT	ns	0.966062	NoSignificance		0	4	1	1	8	7	4	6	8	6
0.137504	0.237504	0.137504	1	2.32193	0.137504	0.137504	3	1	TGME49_231210	APT	1.26616	1.16707	0.476454	RH	0.170837	0.057735	0.0333333	0.0698528	0.167364	APT	ns	2.88976	NoSignificance		0	0	0	0	1	4	0	0	7	1
0.137504	0.237504	0.137504	1	1	0.137504	0.137504	3.16993	2.32193	TGME49_272390	APT	1.29448	1.21849	0.497446	RH	0.170837	0.057735	0.0333333	0.0734554	0.175131	APT	ns	2.92168	NoSignificance	TOC75 (OMP85)	1	0	0	0	1	1	0	0	8	4
0.137504	0.237504	1	1	1.58496	1	0.137504	3.16993	2.58496	TGME49_316400	APT	1.57956	1.12173	0.457946	RH	0.458336	0.471752	0.272366	0.0735172	0.175131	APT	ns	1.78505	NoSignificance		0	0	0	1	1	2	1	0	8	5
0.137504	0.237504	0.137504	1.58496	1	0.137504	0.137504	4.39232	3.58496	TGME49_238170	APT	1.80621	1.79555	0.73303	RH	0.170837	0.057735	0.0333333	0.0760718	0.179962	APT	ns	3.40227	NoSignificance		0	0	0	0	2	1	0	0	20	11
1	1.1	0.137504	2.32193	2.32193	1	1	1.58496	1.58496	TGME49_244320	APT	1.63563	0.592486	0.241881	RH	0.745835	0.529197	0.305532	0.0761558	0.179962	APT	ns	1.13292	NoSignificance		0	1	1	0	4	4	1	1	2	2
0.137504	0.237504	0.137504	1	1.58496	0.137504	0.137504	3	1	TGME49_226340	APT	1.14333	1.06834	0.436147	RH	0.170837	0.057735	0.0333333	0.0761962	0.179962	APT	ns	2.74255	NoSignificance		0	0	0	0	1	2	0	0	7	1
2.58496	0.237504	1	3.58496	3.80735	2.80735	3.70044	3.90689	2.32193	TGME49_209030	APT	3.35482	0.640089	0.261315	RH	1.27416	1.1975	0.691378	0.07935	0.186878	APT	ns	1.39669	NoSignificance		0	5	0	1	11	13	6	12	14	4
0.137504	0.237504	0.137504	1	0.137504	1	0.137504	3.45943	3.16993	TGME49_231890	APT	1.48406	1.47236	0.60109	RH	0.170837	0.057735	0.0333333	0.0806396	0.189377	APT	ns	3.11886	NoSignificance	FabH	0	0	0	0	1	0	1	0	10	8
1	0.237504	0.137504	1.58496	1.58496	0.137504	1.58496	1.58496	1	TGME49_267400	APT	1.24623	0.591416	0.241444	RH	0.458336	0.471752	0.272366	0.0814686	0.190784	APT	ns	1.44309	NoSignificance		0	1	0	0	2	2	0	2	2	1
0.137504	0.237504	0.137504	2.32193	2.32193	0.137504	0.137504	2.58496	0.137504	TGME49_201680	APT	1.27355	1.24818	0.509568	RH	0.170837	0.057735	0.0333333	0.0827859	0.193323	APT	ns	2.89817	NoSignificance		0	0	0	0	4	4	0	0	5	0
1	0.237504	0.137504	1.58496	1	0.137504	1	4.16993	3.80735	TGME49_287270	APT	1.94996	1.64932	0.673331	RH	0.458336	0.471752	0.272366	0.0832529	0.193867	APT	ns	2.08897	NoSignificance	PPC1	1	1	0	0	2	1	0	1	17	13
0.137504	0.237504	0.137504	2	2	0.137504	0.137504	2	0.137504	TGME49_265070	APT	1.06875	1.02013	0.416467	RH	0.170837	0.057735	0.0333333	0.0836433	0.19423	APT	ns	2.64524	NoSignificance		4	0	0	0	3	3	0	0	3	0
0.137504	0.237504	0.137504	2	2	0.137504	0.137504	2.32193	0.137504	TGME49_269340	APT	1.12241	1.08529	0.443069	RH	0.170837	0.057735	0.0333333	0.0845282	0.195737	APT	ns	2.7159	NoSignificance		1	0	0	0	3	3	0	0	4	0
0.137504	0.237504	0.137504	0.137504	3.45943	0.137504	1	3.70044	1	TGME49_278830	APT	1.57248	1.60391	0.654792	RH	0.170837	0.057735	0.0333333	0.0852689	0.196644	APT	ns	3.20235	NoSignificance		0	0	0	0	0	10	0	1	12	1
1.58496	1.1	0.137504	2.58496	3	1.58496	1.58496	2	2	TGME49_305160	APT	2.12581	0.564219	0.230342	RH	0.940822	0.736741	0.425358	0.0855375	0.196644	APT	ns	1.17602	NoSignificance		0	2	1	0	5	7	2	2	3	3
0.137504	0.237504	0.137504	1	2.32193	0.137504	0.137504	3.70044	1	TGME49_240650	APT	1.3829	1.3891	0.567098	RH	0.170837	0.057735	0.0333333	0.0856317	0.196644	APT	ns	3.017	NoSignificance		0	0	0	0	1	4	0	0	12	1
0.137504	0.237504	0.137504	1.58496	1.58496	0.137504	0.137504	1.58496	0.137504	TGME49_223800	APT	0.861233	0.792806	0.323662	RH	0.170837	0.057735	0.0333333	0.0861593	0.19723	APT	ns	2.33378	NoSignificance		2	0	0	0	2	2	0	0	2	0
0.137504	0.237504	0.137504	1	1	0.137504	0.137504	3.58496	2	TGME49_246600	APT	1.30999	1.31097	0.535202	RH	0.170837	0.057735	0.0333333	0.0866005	0.19723	APT	ns	2.93887	NoSignificance		0	0	0	0	1	1	0	0	11	3
0.137504	0.237504	0.137504	0.137504	0.137504	1	1	3.58496	2	TGME49_204050	APT	1.30999	1.31097	0.535202	RH	0.170837	0.057735	0.0333333	0.0866005	0.19723	APT	ns	2.93887	NoSignificance		0	0	0	0	0	0	1	1	11	3
0.137504	0.237504	0.137504	2	2	0.137504	0.137504	2.58496	0.137504	TGME49_216540	APT	1.16625	1.14699	0.468259	RH	0.170837	0.057735	0.0333333	0.0869075	0.197387	APT	ns	2.77118	NoSignificance		2	0	0	0	3	3	0	0	5	0
0.137504	0.237504	0.137504	2	1.58496	0.137504	0.137504	2	0.137504	TGME49_310150	APT	0.999579	0.956439	0.390465	RH	0.170837	0.057735	0.0333333	0.0872964	0.197634	APT	ns	2.5487	NoSignificance		0	0	0	0	3	2	0	0	3	0
0.137504	0.237504	0.137504	1	1	0.137504	0.137504	2.80735	1	TGME49_243200	APT	1.01373	0.975008	0.398045	RH	0.170837	0.057735	0.0333333	0.0878368	0.197634	APT	ns	2.56898	NoSignificance		0	0	0	0	1	1	0	0	6	1
0.137504	0.237504	0.137504	2	0.137504	0.137504	0.137504	1.58496	1.58496	TGME49_286580	APT	0.930406	0.881703	0.359954	RH	0.170837	0.057735	0.0333333	0.0886848	0.197634	APT	ns	2.44524	NoSignificance		0	0	0	0	3	0	0	0	2	2
0.137504	0.237504	0.137504	2	1.58496	0.137504	0.137504	1.58496	0.137504	TGME49_313010	APT	0.930406	0.881703	0.359954	RH	0.170837	0.057735	0.0333333	0.0886848	0.197634	APT	ns	2.44524	NoSignificance		0	0	0	0	3	2	0	0	2	0
0.137504	0.237504	0.137504	1.58496	1.58496	0.137504	0.137504	2	0.137504	TGME49_231000	APT	0.930406	0.881703	0.359954	RH	0.170837	0.057735	0.0333333	0.0886848	0.197634	APT	ns	2.44524	NoSignificance		1	0	0	0	2	2	0	0	3	0
0.137504	0.237504	0.137504	1.58496	1.58496	0.137504	0.137504	2	0.137504	TGME49_232180	APT	0.930406	0.881703	0.359954	RH	0.170837	0.057735	0.0333333	0.0886848	0.197634	APT	ns	2.44524	NoSignificance		1	0	0	0	2	2	0	0	3	0
0.137504	0.237504	0.137504	1.58496	1.58496	0.137504	0.137504	2	0.137504	TGME49_213790	APT	0.930406	0.881703	0.359954	RH	0.170837	0.057735	0.0333333	0.0886848	0.197634	APT	ns	2.44524	NoSignificance		2	0	0	0	2	2	0	0	3	0
0.137504	0.237504	0.137504	2.32193	1.58496	0.137504	0.137504	2	0.137504	TGME49_226250	APT	1.05323	1.02999	0.420491	RH	0.170837	0.057735	0.0333333	0.0899881	0.199553	APT	ns	2.62413	NoSignificance		0	0	0	0	4	2	0	0	3	0
0.137504	0.237504	0.137504	0.137504	2.80735	0.137504	0.137504	3.70044	2.32193	TGME49_245560	APT	1.54037	1.59913	0.652842	RH	0.170837	0.057735	0.0333333	0.0900274	0.199553	APT	ns	3.17259	NoSignificance		0	0	0	0	0	6	0	0	12	4
0.137504	0.237504	0.137504	3.16993	3.16993	0.137504	2	0.137504	0.137504	TGME49_249250	APT	1.45873	1.50906	0.61607	RH	0.170837	0.057735	0.0333333	0.0908715	0.200887	APT	ns	3.09402	NoSignificance		0	0	0	0	8	8	0	3	0	0
0.137504	0.237504	0.137504	1.58496	1.58496	0.137504	0.137504	4.16993	1	TGME49_210270	APT	1.43581	1.48869	0.607756	RH	0.170837	0.057735	0.0333333	0.0919316	0.20269	APT	ns	3.07117	NoSignificance		0	0	0	0	2	2	0	0	17	1
0.137504	0.237504	0.137504	2	3.16993	0.137504	0.137504	3.45943	0.137504	TGME49_236930	APT	1.50698	1.57778	0.644125	RH	0.170837	0.057735	0.0333333	0.0927546	0.203962	APT	ns	3.14097	NoSignificance		0	0	0	0	3	8	0	0	10	0
0.137504	0.237504	0.137504	2.32193	3.45943	0.137504	0.137504	4.24793	0.137504	TGME49_310190	APT	1.7403	1.8595	0.759139	RH	0.170837	0.057735	0.0333333	0.0935672	0.204912	APT	ns	3.34864	NoSignificance		0	0	0	0	4	10	0	0	18	0
0.137504	0.237504	0.137504	2.58496	2.58496	0.137504	0.137504	1.58496	0.137504	TGME49_300100	APT	1.19457	1.21416	0.49568	RH	0.170837	0.057735	0.0333333	0.093853	0.204912	APT	ns	2.8058	NoSignificance		3	0	0	0	5	5	0	0	2	0
0.137504	0.237504	0.137504	1.58496	1.58496	0.137504	0.137504	2.32193	0.137504	TGME49_253000	APT	0.984061	0.965612	0.394209	RH	0.170837	0.057735	0.0333333	0.0941756	0.204912	APT	ns	2.52613	NoSignificance		0	0	0	0	2	2	0	0	4	0
0.137504	0.237504	0.137504	1.58496	1.58496	0.137504	0.137504	2.32193	0.137504	TGME49_310802	APT	0.984061	0.965612	0.394209	RH	0.170837	0.057735	0.0333333	0.0941756	0.204912	APT	ns	2.52613	NoSignificance		0	0	0	0	2	2	0	0	4	0
0.137504	0.237504	0.137504	0.137504	2	0.137504	2	3.16993	0.137504	TGME49_205550	APT	1.26374	1.3056	0.533008	RH	0.170837	0.057735	0.0333333	0.0956403	0.207057	APT	ns	2.88701	NoSignificance		0	0	0	0	0	3	0	3	8	0
0.137504	0.237504	0.137504	1.58496	2.58496	0.137504	0.137504	2.80735	0.137504	TGME49_320690	APT	1.23163	1.26733	0.517384	RH	0.170837	0.057735	0.0333333	0.0956607	0.207057	APT	ns	2.84988	NoSignificance		0	0	0	0	2	5	0	0	6	0
0.137504	0.237504	0.137504	1.58496	2.80735	0.137504	0.137504	2.80735	0.137504	TGME49_313100	APT	1.2687	1.3171	0.537704	RH	0.170837	0.057735	0.0333333	0.0967052	0.208157	APT	ns	2.89266	NoSignificance		0	0	0	0	2	6	0	0	6	0
1	0.237504	0.137504	1.58496	1.58496	0.137504	1	2	1	TGME49_217570	APT	1.2179	0.654732	0.267293	RH	0.458336	0.471752	0.272366	0.0968737	0.208157	APT	ns	1.40992	NoSignificance		0	1	0	0	2	2	0	1	3	1
0.137504	0.237504	0.137504	1	2.32193	0.137504	0.137504	4.16993	1	TGME49_235160	APT	1.46114	1.5497	0.632661	RH	0.170837	0.057735	0.0333333	0.0969696	0.208157	APT	ns	3.09641	NoSignificance		0	0	0	0	1	4	0	0	17	1
0.137504	0.237504	0.137504	2	1.58496	0.137504	0.137504	2.80735	0.137504	TGME49_243800	APT	1.13414	1.16038	0.473725	RH	0.170837	0.057735	0.0333333	0.0977524	0.208157	APT	ns	2.73091	NoSignificance		0	0	0	0	3	2	0	0	6	0
0.137504	0.237504	0.137504	1.58496	0.137504	0.137504	0.137504	1.58496	1	TGME49_300140	APT	0.763739	0.718491	0.293323	RH	0.170837	0.057735	0.0333333	0.0994333	0.208157	APT	ns	2.16046	NoSignificance		0	0	0	0	2	0	0	0	2	1
0.137504	0.237504	0.137504	1.58496	0.137504	0.137504	0.137504	1.58496	1	TGME49_225500	APT	0.763739	0.718491	0.293323	RH	0.170837	0.057735	0.0333333	0.0994333	0.208157	APT	ns	2.16046	NoSignificance		4	0	0	0	2	0	0	0	2	1
0.137504	0.237504	0.137504	1.58496	0.137504	0.137504	0.137504	1.58496	1	TGME49_233530	APT	0.763739	0.718491	0.293323	RH	0.170837	0.057735	0.0333333	0.0994333	0.208157	APT	ns	2.16046	NoSignificance		0	0	0	0	2	0	0	0	2	1
0.137504	0.237504	0.137504	1.58496	1	0.137504	0.137504	1.58496	0.137504	TGME49_255980	APT	0.763739	0.718491	0.293323	RH	0.170837	0.057735	0.0333333	0.0994333	0.208157	APT	ns	2.16046	NoSignificance		1	0	0	0	2	1	0	0	2	0
0.137504	0.237504	0.137504	1	1.58496	0.137504	0.137504	1.58496	0.137504	TGME49_273460	APT	0.763739	0.718491	0.293323	RH	0.170837	0.057735	0.0333333	0.0994333	0.208157	APT	ns	2.16046	NoSignificance		2	0	0	0	1	2	0	0	2	0
0.137504	0.237504	0.137504	1	1.58496	0.137504	0.137504	1.58496	0.137504	TGME49_278990	APT	0.763739	0.718491	0.293323	RH	0.170837	0.057735	0.0333333	0.0994333	0.208157	APT	ns	2.16046	NoSignificance	apicoplast	1	0	0	0	1	2	0	0	2	0
0.137504	0.237504	0.137504	1	1.58496	0.137504	0.137504	1.58496	0.137504	TGME49_249580	APT	0.763739	0.718491	0.293323	RH	0.170837	0.057735	0.0333333	0.0994333	0.208157	APT	ns	2.16046	NoSignificance	Non-apicoplast	10	0	0	0	1	2	0	0	2	0
0.137504	0.237504	0.137504	0.137504	1.58496	0.137504	1	1.58496	0.137504	TGME49_235620	APT	0.763739	0.718491	0.293323	RH	0.170837	0.057735	0.0333333	0.0994333	0.208157	APT	ns	2.16046	NoSignificance		0	0	0	0	0	2	0	1	2	0
0.137504	0.237504	0.137504	0.137504	1.58496	0.137504	0.137504	1.58496	1	TGME49_321680	APT	0.763739	0.718491	0.293323	RH	0.170837	0.057735	0.0333333	0.0994333	0.208157	APT	ns	2.16046	NoSignificance		0	0	0	0	0	2	0	0	2	1
0.137504	0.237504	0.137504	0.137504	1.58496	0.137504	1.58496	2.58496	0.137504	TGME49_264420	APT	1.0279	1.04149	0.425186	RH	0.170837	0.057735	0.0333333	0.100014	0.208846	APT	ns	2.58901	NoSignificance		0	0	0	0	0	2	0	2	5	0
0.137504	0.237504	0.137504	0.137504	2.32193	0.137504	0.137504	3.16993	1.58496	TGME49_216670	APT	1.24822	1.31608	0.537285	RH	0.170837	0.057735	0.0333333	0.101325	0.210009	APT	ns	2.86918	NoSignificance		0	0	0	0	0	4	0	0	8	2
1	0.237504	0.137504	1.58496	1.58496	0.137504	0.137504	3.45943	2.80735	TGME49_245670	APT	1.61862	1.35583	0.553515	RH	0.458336	0.471752	0.272366	0.103736	0.210009	APT	ns	1.82029	NoSignificance	PDH E1 alpha	0	1	0	0	2	2	0	0	10	6
2.32193	1.1	2.32193	3.70044	3	2.32193	3	3	2.80735	TGME49_263700	APT	2.97162	0.443323	0.180986	RH	1.91462	0.705481	0.407309	0.103781	0.210009	APT	ns	0.634193	NoSignificance		0	4	1	4	12	7	4	7	7	6
0.137504	0.237504	1.58496	1.58496	2	0.137504	1.58496	3	3.16993	TGME49_233460	APT	1.91289	1.10785	0.452276	RH	0.653323	0.808371	0.466713	0.104535	0.210009	APT	ns	1.54989	NoSignificance		0	0	0	2	2	3	0	2	7	8
0.137504	0.237504	0.137504	1.58496	2	0.137504	0.137504	3.16993	0.137504	TGME49_271888	APT	1.19457	1.26928	0.51818	RH	0.170837	0.057735	0.0333333	0.105246	0.210009	APT	ns	2.8058	NoSignificance		2	0	0	0	2	3	0	0	8	0
0.137504	0.237504	0.137504	2	1.58496	0.137504	0.137504	1	0.137504	TGME49_238050	APT	0.832912	0.825393	0.336965	RH	0.170837	0.057735	0.0333333	0.106844	0.210009	APT	ns	2.28555	NoSignificance		0	0	0	0	3	2	0	0	1	0
0.137504	0.237504	0.137504	2	1.58496	0.137504	1	0.137504	0.137504	TGME49_276940	APT	0.832912	0.825393	0.336965	RH	0.170837	0.057735	0.0333333	0.106844	0.210009	APT	ns	2.28555	NoSignificance		1	0	0	0	3	2	0	1	0	0
0.137504	0.237504	0.137504	1.58496	1	0.137504	0.137504	2	0.137504	TGME49_222960	APT	0.832912	0.825393	0.336965	RH	0.170837	0.057735	0.0333333	0.106844	0.210009	APT	ns	2.28555	NoSignificance		0	0	0	0	2	1	0	0	3	0
0.137504	0.237504	0.137504	1	1.58496	0.137504	0.137504	2	0.137504	TGME49_277000	APT	0.832912	0.825393	0.336965	RH	0.170837	0.057735	0.0333333	0.106844	0.210009	APT	ns	2.28555	NoSignificance		0	0	0	0	1	2	0	0	3	0
0.137504	0.237504	0.137504	1	0.137504	0.137504	0.137504	2	1.58496	TGME49_214920	APT	0.832912	0.825393	0.336965	RH	0.170837	0.057735	0.0333333	0.106844	0.210009	APT	ns	2.28555	NoSignificance		13	0	0	0	1	0	0	0	3	2
0.137504	0.237504	0.137504	1	1.58496	0.137504	0.137504	2	0.137504	TGME49_206590	APT	0.832912	0.825393	0.336965	RH	0.170837	0.057735	0.0333333	0.106844	0.210009	APT	ns	2.28555	NoSignificance		0	0	0	0	1	2	0	0	3	0
0.137504	0.237504	0.137504	1	2	0.137504	0.137504	1.58496	0.137504	TGME49_264090	APT	0.832912	0.825393	0.336965	RH	0.170837	0.057735	0.0333333	0.106844	0.210009	APT	ns	2.28555	NoSignificance		0	0	0	0	1	3	0	0	2	0
0.137504	0.237504	0.137504	0.137504	1.58496	0.137504	1	2	0.137504	TGME49_223410	APT	0.832912	0.825393	0.336965	RH	0.170837	0.057735	0.0333333	0.106844	0.210009	APT	ns	2.28555	NoSignificance		0	0	0	0	0	2	0	1	3	0
0.137504	0.237504	0.137504	0.137504	1	0.137504	0.137504	2	1.58496	TGME49_215980	APT	0.832912	0.825393	0.336965	RH	0.170837	0.057735	0.0333333	0.106844	0.210009	APT	ns	2.28555	NoSignificance		1	0	0	0	0	1	0	0	3	2
0.137504	0.237504	0.137504	1.58496	1	0.137504	0.137504	1	0.137504	TGME49_223910	APT	0.666246	0.617338	0.252027	RH	0.170837	0.057735	0.0333333	0.106929	0.210009	APT	ns	1.96343	NoSignificance		3	0	0	0	2	1	0	0	1	0
0.137504	0.237504	0.137504	1.58496	1	0.137504	0.137504	1	0.137504	TGME49_230610	APT	0.666246	0.617338	0.252027	RH	0.170837	0.057735	0.0333333	0.106929	0.210009	APT	ns	1.96343	NoSignificance		1	0	0	0	2	1	0	0	1	0
0.137504	0.237504	0.137504	1.58496	1	0.137504	0.137504	1	0.137504	TGME49_257340	APT	0.666246	0.617338	0.252027	RH	0.170837	0.057735	0.0333333	0.106929	0.210009	APT	ns	1.96343	NoSignificance		0	0	0	0	2	1	0	0	1	0
0.137504	0.237504	0.137504	1	1	0.137504	0.137504	1.58496	0.137504	TGME49_290660	APT	0.666246	0.617338	0.252027	RH	0.170837	0.057735	0.0333333	0.106929	0.210009	APT	ns	1.96343	NoSignificance		0	0	0	0	1	1	0	0	2	0
0.137504	0.237504	0.137504	1	1	0.137504	0.137504	1.58496	0.137504	TGME49_236620	APT	0.666246	0.617338	0.252027	RH	0.170837	0.057735	0.0333333	0.106929	0.210009	APT	ns	1.96343	NoSignificance		0	0	0	0	1	1	0	0	2	0
0.137504	0.237504	0.137504	1	1	0.137504	0.137504	1.58496	0.137504	TGME49_266750	APT	0.666246	0.617338	0.252027	RH	0.170837	0.057735	0.0333333	0.106929	0.210009	APT	ns	1.96343	NoSignificance	apicoplast	7	0	0	0	1	1	0	0	2	0
0.137504	0.237504	0.137504	1	1	0.137504	0.137504	1.58496	0.137504	TGME49_239820	APT	0.666246	0.617338	0.252027	RH	0.170837	0.057735	0.0333333	0.106929	0.210009	APT	ns	1.96343	NoSignificance		0	0	0	0	1	1	0	0	2	0
0.137504	0.237504	0.137504	1	1	0.137504	0.137504	1.58496	0.137504	TGME49_230510	APT	0.666246	0.617338	0.252027	RH	0.170837	0.057735	0.0333333	0.106929	0.210009	APT	ns	1.96343	NoSignificance		1	0	0	0	1	1	0	0	2	0
0.137504	0.237504	0.137504	1	1.58496	0.137504	0.137504	1	0.137504	TGME49_229440	APT	0.666246	0.617338	0.252027	RH	0.170837	0.057735	0.0333333	0.106929	0.210009	APT	ns	1.96343	NoSignificance		5	0	0	0	1	2	0	0	1	0
0.137504	0.237504	0.137504	1	1.58496	0.137504	0.137504	1	0.137504	TGME49_287500	APT	0.666246	0.617338	0.252027	RH	0.170837	0.057735	0.0333333	0.106929	0.210009	APT	ns	1.96343	NoSignificance		0	0	0	0	1	2	0	0	1	0
0.137504	0.237504	0.137504	1	1	0.137504	0.137504	1.58496	0.137504	TGME49_305140	APT	0.666246	0.617338	0.252027	RH	0.170837	0.057735	0.0333333	0.106929	0.210009	APT	ns	1.96343	NoSignificance		0	0	0	0	1	1	0	0	2	0
0.137504	0.237504	0.137504	1	2	0.137504	0.137504	2	0.137504	TGME49_320740	APT	0.902085	0.913693	0.373014	RH	0.170837	0.057735	0.0333333	0.107411	0.210009	APT	ns	2.40064	NoSignificance		1	0	0	0	1	3	0	0	3	0
0.137504	0.237504	0.137504	0.137504	2	0.137504	0.137504	2	1	TGME49_257350	APT	0.902085	0.913693	0.373014	RH	0.170837	0.057735	0.0333333	0.107411	0.210009	APT	ns	2.40064	NoSignificance		0	0	0	0	0	3	0	0	3	1
0.137504	0.237504	0.137504	1	2	0.137504	0.137504	2.32193	0.137504	TGME49_214110	APT	0.95574	0.996739	0.406917	RH	0.170837	0.057735	0.0333333	0.111812	0.217077	APT	ns	2.484	NoSignificance		4	0	0	0	1	3	0	0	4	0
0.137504	0.237504	0.137504	1	2.32193	0.137504	0.137504	2	0.137504	TGME49_256920	APT	0.95574	0.996739	0.406917	RH	0.170837	0.057735	0.0333333	0.111812	0.217077	APT	ns	2.484	NoSignificance		0	0	0	0	1	4	0	0	3	0
0.137504	0.237504	0.137504	0.137504	2	0.137504	0.137504	2.32193	1	TGME49_203160	APT	0.95574	0.996739	0.406917	RH	0.170837	0.057735	0.0333333	0.111812	0.217077	APT	ns	2.484	NoSignificance		0	0	0	0	0	3	0	0	4	1
2.80735	1.1	0.137504	3.16993	3.45943	2.58496	2.80735	4.08746	4	TGME49_217740	APT	3.35152	0.614896	0.25103	RH	1.34829	1.35213	0.780654	0.112485	0.217874	APT	ns	1.31369	NoSignificance	FabG	0	6	1	0	8	10	5	6	16	15
0.137504	0.237504	0.137504	2.32193	2.32193	0.137504	1	0.137504	0.137504	TGME49_205100	APT	1.00939	1.07016	0.436889	RH	0.170837	0.057735	0.0333333	0.113164	0.218679	APT	ns	2.5628	NoSignificance		2	0	0	0	4	4	0	1	0	0
2.58496	0.237504	0.137504	2	2.58496	2	2	4.64386	4.39232	TGME49_253900	APT	2.93686	1.24813	0.509547	RH	0.986657	1.38508	0.799674	0.114327	0.220398	APT	ns	1.57365	NoSignificance	HemB (ALAD)	0	5	0	0	3	5	3	3	24	20
0.137504	0.237504	0.137504	0.137504	2	0.137504	0.137504	3.58496	1.58496	TGME49_268950	APT	1.26374	1.40275	0.572671	RH	0.170837	0.057735	0.0333333	0.114703	0.220398	APT	ns	2.88701	NoSignificance		0	0	0	0	0	3	0	0	11	2
0.137504	0.237504	0.137504	1.58496	0.137504	0.137504	1	2.32193	0.137504	TGME49_229030	APT	0.886567	0.921322	0.376128	RH	0.170837	0.057735	0.0333333	0.115649	0.220398	APT	ns	2.37561	NoSignificance		2	0	0	0	2	0	0	1	4	0
0.137504	0.237504	0.137504	1.58496	1	0.137504	0.137504	2.32193	0.137504	TGME49_312050	APT	0.886567	0.921322	0.376128	RH	0.170837	0.057735	0.0333333	0.115649	0.220398	APT	ns	2.37561	NoSignificance		0	0	0	0	2	1	0	0	4	0
0.137504	0.237504	0.137504	1	1.58496	0.137504	0.137504	2.32193	0.137504	TGME49_311310	APT	0.886567	0.921322	0.376128	RH	0.170837	0.057735	0.0333333	0.115649	0.220398	APT	ns	2.37561	NoSignificance		0	0	0	0	1	2	0	0	4	0
0.137504	0.237504	0.137504	1	1.58496	0.137504	0.137504	2.32193	0.137504	TGME49_280400	APT	0.886567	0.921322	0.376128	RH	0.170837	0.057735	0.0333333	0.115649	0.220398	APT	ns	2.37561	NoSignificance	Non-apicoplast	12	0	0	0	1	2	0	0	4	0
0.137504	0.237504	0.137504	0.137504	1	0.137504	0.137504	2.58496	2	TGME49_267690	APT	0.999579	1.0718	0.437562	RH	0.170837	0.057735	0.0333333	0.116919	0.222307	APT	ns	2.5487	NoSignificance	Negtive	6	0	0	0	0	1	0	0	5	3
4.39232	0.237504	1	4.70044	4.85798	4.58496	4.58496	6.12928	5.97728	TGME49_269190	APT	5.13915	0.716742	0.292609	RH	1.87661	2.21178	1.27697	0.118418	0.224642	APT	ns	1.4534	NoSignificance	RNA polymerase Rpb3/Rpb11 dimerisation domain-containing protein	1	20	0	1	25	28	23	23	69	62
0.137504	0.237504	0.137504	0.137504	1.58496	0.137504	0.137504	3.32193	1.58496	TGME49_309600	APT	1.15073	1.27837	0.521891	RH	0.170837	0.057735	0.0333333	0.119364	0.225529	APT	ns	2.75185	NoSignificance		0	0	0	0	0	2	0	0	9	2
0.137504	0.237504	0.137504	0.137504	1	0.137504	0.137504	2.32193	2.80735	TGME49_211680	APT	1.0903	1.19973	0.489789	RH	0.170837	0.057735	0.0333333	0.11943	0.225529	APT	ns	2.67403	NoSignificance		0	0	0	0	0	1	0	0	4	6
2	0.237504	0.137504	1.58496	2.58496	0.137504	2.32193	4.52356	2.80735	TGME49_230410	APT	2.32671	1.44684	0.590669	RH	0.791669	1.04764	0.604855	0.122862	0.230978	APT	ns	1.55532	NoSignificance		0	3	0	0	2	5	0	4	22	6
2	0.237504	0.137504	2	2.80735	1	1	3.58496	3	TGME49_266760	APT	2.23205	1.08082	0.441242	RH	0.791669	1.04764	0.604855	0.123033	0.230978	APT	ns	1.4954	NoSignificance	ICDH2	0	3	0	0	3	6	1	1	11	7
1.58496	1.68496	0.137504	3.32193	3.16993	1	1.58496	3.58496	1.58496	TGME49_250770	APT	2.37446	1.10739	0.452089	RH	1.13581	0.866003	0.499987	0.123151	0.230978	APT	ns	1.06388	NoSignificance		0	2	2	0	9	8	1	2	11	2
0.137504	0.237504	0.137504	0.137504	1.58496	0.137504	0.137504	2.58496	1	TGME49_229000	APT	0.930406	1.00568	0.410566	RH	0.170837	0.057735	0.0333333	0.123753	0.231088	APT	ns	2.44524	NoSignificance		0	0	0	0	0	2	0	0	5	1
0.137504	0.237504	0.137504	1	2	0.137504	0.137504	1	0.137504	TGME49_279390	APT	0.735418	0.749891	0.306142	RH	0.170837	0.057735	0.0333333	0.124882	0.231088	APT	ns	2.10595	NoSignificance		0	0	0	0	1	3	0	0	1	0
0.137504	0.237504	0.137504	1	1	0.137504	0.137504	2	0.137504	TGME49_214970	APT	0.735418	0.749891	0.306142	RH	0.170837	0.057735	0.0333333	0.124882	0.231088	APT	ns	2.10595	NoSignificance		0	0	0	0	1	1	0	0	3	0
0.137504	0.237504	0.137504	1	1	0.137504	0.137504	2	0.137504	TGME49_207710	APT	0.735418	0.749891	0.306142	RH	0.170837	0.057735	0.0333333	0.124882	0.231088	APT	ns	2.10595	NoSignificance		4	0	0	0	1	1	0	0	3	0
0.137504	0.237504	0.137504	1	1	0.137504	0.137504	2	0.137504	TGME49_227030	APT	0.735418	0.749891	0.306142	RH	0.170837	0.057735	0.0333333	0.124882	0.231088	APT	ns	2.10595	NoSignificance		0	0	0	0	1	1	0	0	3	0
0.137504	0.237504	0.137504	0.137504	1	0.137504	0.137504	2	1	TGME49_247380	APT	0.735418	0.749891	0.306142	RH	0.170837	0.057735	0.0333333	0.124882	0.231088	APT	ns	2.10595	NoSignificance		2	0	0	0	0	1	0	0	3	1
0.137504	0.237504	0.137504	1	2	0.137504	0.137504	3	0.137504	TGME49_244910	APT	1.06875	1.20028	0.490012	RH	0.170837	0.057735	0.0333333	0.126526	0.233608	APT	ns	2.64524	NoSignificance		0	0	0	0	1	3	0	0	7	0
0.137504	0.237504	0.137504	0.137504	1	0.137504	0.137504	3.45943	3	TGME49_307570	APT	1.31199	1.52948	0.624406	RH	0.170837	0.057735	0.0333333	0.127258	0.234437	APT	ns	2.94107	NoSignificance		0	0	0	0	0	1	0	0	10	7
0.137504	0.237504	0.137504	0.137504	1	0.137504	0.137504	3.58496	3.16993	TGME49_258870	APT	1.36123	1.60246	0.654201	RH	0.170837	0.057735	0.0333333	0.128561	0.236313	APT	ns	2.99422	NoSignificance		2	0	0	0	0	1	0	0	11	8
0.137504	0.237504	0.137504	2	0.137504	0.137504	0.137504	3.16993	1	TGME49_232620	APT	1.09707	1.25569	0.512632	RH	0.170837	0.057735	0.0333333	0.130758	0.239498	APT	ns	2.68297	NoSignificance		0	0	0	0	3	0	0	0	8	1
0.137504	0.237504	0.137504	0.137504	1	0.137504	0.137504	2.80735	1.58496	TGME49_235490	APT	0.967471	1.08019	0.440986	RH	0.170837	0.057735	0.0333333	0.130871	0.239498	APT	ns	2.5016	NoSignificance		1	0	0	0	0	1	0	0	6	2
0.137504	0.237504	0.137504	1	0.137504	0.137504	0.137504	4.16993	3.16993	TGME49_262430	APT	1.45873	1.77348	0.724019	RH	0.170837	0.057735	0.0333333	0.135485	0.247394	APT	ns	3.09402	NoSignificance		1	0	0	0	1	0	0	0	17	8
0.137504	0.237504	0.137504	0.137504	1.58496	0.137504	0.137504	3	1	TGME49_307860	APT	0.999579	1.14664	0.468113	RH	0.170837	0.057735	0.0333333	0.137083	0.249763	APT	ns	2.5487	NoSignificance	Non-apicoplast	7	0	0	0	0	2	0	0	7	1
2	0.237504	1.58496	3	2.80735	1	3	3.45943	1.58496	TGME49_232300	APT	2.47529	0.959021	0.391519	RH	1.27416	0.921439	0.531993	0.138847	0.249873	APT	ns	0.958057	NoSignificance		0	3	0	2	7	6	1	7	10	2
0.137504	0.237504	0.137504	1	1	0.137504	0.137504	2.32193	0.137504	TGME49_313020	APT	0.789073	0.861656	0.35177	RH	0.170837	0.057735	0.0333333	0.139555	0.249873	APT	ns	2.20754	NoSignificance	Non-apicoplast	8	0	0	0	1	1	0	0	4	0
0.137504	0.237504	0.137504	1	1	0.137504	0.137504	2.32193	0.137504	TGME49_264870	APT	0.789073	0.861656	0.35177	RH	0.170837	0.057735	0.0333333	0.139555	0.249873	APT	ns	2.20754	NoSignificance	apicoplast	14	0	0	0	1	1	0	0	4	0
0.137504	0.237504	0.137504	1	1	0.137504	0.137504	2.32193	0.137504	TGME49_264900	APT	0.789073	0.861656	0.35177	RH	0.170837	0.057735	0.0333333	0.139555	0.249873	APT	ns	2.20754	NoSignificance		0	0	0	0	1	1	0	0	4	0
0.137504	0.237504	0.137504	1	1	0.137504	0.137504	2.32193	0.137504	TGME49_226710	APT	0.789073	0.861656	0.35177	RH	0.170837	0.057735	0.0333333	0.139555	0.249873	APT	ns	2.20754	NoSignificance		4	0	0	0	1	1	0	0	4	0
0.137504	0.237504	0.137504	0.137504	1	0.137504	0.137504	2.32193	1	TGME49_278890	APT	0.789073	0.861656	0.35177	RH	0.170837	0.057735	0.0333333	0.139555	0.249873	APT	ns	2.20754	NoSignificance		1	0	0	0	0	1	0	0	4	1
0.137504	0.237504	0.137504	0.137504	1	0.137504	0.137504	2.32193	1	TGME49_320588	APT	0.789073	0.861656	0.35177	RH	0.170837	0.057735	0.0333333	0.139555	0.249873	APT	ns	2.20754	NoSignificance		1	0	0	0	0	1	0	0	4	1
0.137504	0.237504	0.137504	0.137504	1	0.137504	0.137504	2.32193	1	TGME49_294730	APT	0.789073	0.861656	0.35177	RH	0.170837	0.057735	0.0333333	0.139555	0.249873	APT	ns	2.20754	NoSignificance		0	0	0	0	0	1	0	0	4	1
1.58496	0.237504	0.137504	2	2.32193	0.137504	1	3	2	TGME49_232710	APT	1.74324	1.01754	0.41541	RH	0.653323	0.808371	0.466713	0.139998	0.250126	APT	ns	1.4159	NoSignificance		0	2	0	0	3	4	0	1	7	3
0.137504	0.237504	0.137504	1	1.58496	0.137504	0.137504	3.16993	0.137504	TGME49_278630	APT	1.0279	1.20646	0.492537	RH	0.170837	0.057735	0.0333333	0.142527	0.254096	APT	ns	2.58901	NoSignificance		1	0	0	0	1	2	0	0	8	0
0.137504	0.237504	0.137504	0.137504	1	0.137504	0.137504	3.32193	1.58496	TGME49_215380	APT	1.05323	1.26081	0.514724	RH	0.170837	0.057735	0.0333333	0.147333	0.261638	APT	ns	2.62413	NoSignificance		0	0	0	0	0	1	0	0	9	2
0.137504	1.1	0.137504	2.80735	3	0.137504	1.58496	0.137504	1	TGME49_320050	APT	1.44455	1.25783	0.513509	RH	0.458336	0.555698	0.320832	0.147389	0.261638	APT	ns	1.65615	NoSignificance		0	0	1	0	6	7	0	2	0	1
0.137504	0.237504	0.137504	1	1	0.137504	0.137504	2.58496	0.137504	TGME49_272640	APT	0.832912	0.956692	0.390568	RH	0.170837	0.057735	0.0333333	0.151176	0.267218	APT	ns	2.28555	NoSignificance		0	0	0	0	1	1	0	0	5	0
0.137504	0.237504	0.137504	1	1	0.137504	0.137504	2.58496	0.137504	TGME49_278960	APT	0.832912	0.956692	0.390568	RH	0.170837	0.057735	0.0333333	0.151176	0.267218	APT	ns	2.28555	NoSignificance	Non-apicoplast	6	0	0	0	1	1	0	0	5	0
0.137504	0.237504	0.137504	1	1.58496	0.137504	0.137504	3.45943	0.137504	TGME49_223760	APT	1.07615	1.31056	0.535036	RH	0.170837	0.057735	0.0333333	0.151609	0.267412	APT	ns	2.65519	NoSignificance		0	0	0	0	1	2	0	0	10	0
2.32193	0.237504	0.137504	3.16993	2.80735	1	2.32193	3	2	TGME49_215460	APT	2.3832	0.805373	0.328792	RH	0.898978	1.23332	0.71206	0.158239	0.278513	APT	ns	1.40654	NoSignificance		0	4	0	0	8	6	1	4	7	3
0.137504	0.237504	0.137504	1	1	0.137504	0.137504	2.80735	0.137504	TGME49_289820	APT	0.869978	1.03892	0.424138	RH	0.170837	0.057735	0.0333333	0.16053	0.280758	APT	ns	2.34836	NoSignificance		0	0	0	0	1	1	0	0	6	0
0.137504	0.237504	0.137504	1	1	0.137504	0.137504	2.80735	0.137504	TGME49_313790	APT	0.869978	1.03892	0.424138	RH	0.170837	0.057735	0.0333333	0.16053	0.280758	APT	ns	2.34836	NoSignificance		0	0	0	0	1	1	0	0	6	0
0.137504	0.237504	0.137504	0.137504	1	0.137504	0.137504	2.80735	1	TGME49_246100	APT	0.869978	1.03892	0.424138	RH	0.170837	0.057735	0.0333333	0.16053	0.280758	APT	ns	2.34836	NoSignificance		0	0	0	0	0	1	0	0	6	1
0.137504	0.237504	0.137504	1	1	0.137504	0.137504	3	0.137504	TGME49_312100	APT	0.902085	1.11123	0.453658	RH	0.170837	0.057735	0.0333333	0.168223	0.292363	APT	ns	2.40064	NoSignificance		11	0	0	0	1	1	0	0	7	0
0.137504	0.237504	0.137504	1	1	0.137504	0.137504	3	0.137504	TGME49_213350	APT	0.902085	1.11123	0.453658	RH	0.170837	0.057735	0.0333333	0.168223	0.292363	APT	ns	2.40064	NoSignificance		0	0	0	0	1	1	0	0	7	0
0.137504	0.237504	0.137504	0.137504	1	0.137504	0.137504	3	1	TGME49_281640	APT	0.902085	1.11123	0.453658	RH	0.170837	0.057735	0.0333333	0.168223	0.292363	APT	ns	2.40064	NoSignificance	Non-apicoplast	7	0	0	0	0	1	0	0	7	1
0.137504	0.237504	0.137504	0.137504	1	0.137504	0.137504	3.16993	1	TGME49_311230	APT	0.930406	1.17569	0.479973	RH	0.170837	0.057735	0.0333333	0.17468	0.302948	APT	ns	2.44524	NoSignificance		1	0	0	0	0	1	0	0	8	1
0.137504	0.237504	0.137504	1	1	0.137504	0.137504	3.45943	0.137504	TGME49_274130	APT	0.978657	1.28668	0.525286	RH	0.170837	0.057735	0.0333333	0.184968	0.310167	APT	ns	2.51818	NoSignificance		0	0	0	0	1	1	0	0	10	0
0.137504	0.237504	0.137504	0.137504	0.137504	0.137504	0.137504	3.80735	3.70044	TGME49_270240	APT	1.34297	1.8678	0.762528	RH	0.170837	0.057735	0.0333333	0.184989	0.310167	APT	ns	2.97473	NoSignificance		1	0	0	0	0	0	0	0	13	12
0.137504	0.237504	0.137504	0.137504	0.137504	0.137504	0.137504	3.90689	3.45943	TGME49_213010	APT	1.31939	1.83643	0.749719	RH	0.170837	0.057735	0.0333333	0.186232	0.310167	APT	ns	2.94918	NoSignificance		0	0	0	0	0	0	0	0	14	10
0.137504	0.237504	0.137504	0.137504	0.137504	0.137504	0.137504	3.16993	3	TGME49_286050	APT	1.11999	1.52301	0.621766	RH	0.170837	0.057735	0.0333333	0.187601	0.310167	APT	ns	2.71279	NoSignificance	TIC22	0	0	0	0	0	0	0	0	8	7
0.137504	0.237504	0.137504	0.137504	0.137504	0.137504	0.137504	3	3.16993	TGME49_228130	APT	1.11999	1.52301	0.621766	RH	0.170837	0.057735	0.0333333	0.187601	0.310167	APT	ns	2.71279	NoSignificance		0	0	0	0	0	0	0	0	7	8
0.137504	0.237504	0.137504	0.137504	0.137504	0.137504	0.137504	3.80735	3.16993	TGME49_289000	APT	1.25455	1.74222	0.711258	RH	0.170837	0.057735	0.0333333	0.188252	0.310167	APT	ns	2.87648	NoSignificance		0	0	0	0	0	0	0	0	13	8
0.137504	0.237504	0.137504	0.137504	0.137504	0.137504	0.137504	3	2.80735	TGME49_258380	APT	1.05956	1.42974	0.583691	RH	0.170837	0.057735	0.0333333	0.188584	0.310167	APT	ns	2.63278	NoSignificance		1	0	0	0	0	0	0	0	7	6
0.137504	0.237504	0.137504	3	3.58496	0.137504	0.137504	0.137504	0.137504	TGME49_263320	APT	1.18916	1.63969	0.669401	RH	0.170837	0.057735	0.0333333	0.188855	0.310167	APT	ns	2.79926	NoSignificance		0	0	0	0	7	11	0	0	0	0
0.137504	0.237504	0.137504	0.137504	2.80735	0.137504	0.137504	3.16993	0.137504	TGME49_272910	APT	1.08788	1.47678	0.602892	RH	0.170837	0.057735	0.0333333	0.188938	0.310167	APT	ns	2.67083	NoSignificance		0	0	0	0	0	6	0	0	8	0
0.137504	0.237504	0.137504	2.58496	2.80735	0.137504	0.137504	0.137504	0.137504	TGME49_310750	APT	0.990389	1.32315	0.540175	RH	0.170837	0.057735	0.0333333	0.189938	0.310167	APT	ns	2.53538	NoSignificance		1	0	0	0	5	6	0	0	0	0
0.137504	0.237504	0.137504	0.137504	0.137504	0.137504	0.137504	2.80735	2.58496	TGME49_246550	APT	0.990389	1.32315	0.540175	RH	0.170837	0.057735	0.0333333	0.189938	0.310167	APT	ns	2.53538	NoSignificance		1	0	0	0	0	0	0	0	6	5
0.137504	0.237504	0.137504	0.137504	0.137504	0.137504	0.137504	3	2.58496	TGME49_270910	APT	1.0225	1.37729	0.562277	RH	0.170837	0.057735	0.0333333	0.190537	0.310167	APT	ns	2.5814	NoSignificance		0	0	0	0	0	0	0	0	7	5
0.137504	0.237504	0.137504	0.137504	0.137504	0.137504	0.137504	3.90689	3	TGME49_222300	APT	1.24282	1.73619	0.708798	RH	0.170837	0.057735	0.0333333	0.190999	0.310167	APT	ns	2.86292	NoSignificance		1	0	0	0	0	0	0	0	14	7
0.137504	0.237504	0.137504	2.32193	2.32193	0.137504	0.137504	0.137504	0.137504	TGME49_238250	APT	0.865645	1.12803	0.460517	RH	0.170837	0.057735	0.0333333	0.192115	0.310167	APT	ns	2.34116	NoSignificance		0	0	0	0	4	4	0	0	0	0
0.137504	0.237504	0.137504	0.137504	0.137504	0.137504	0.137504	2.32193	2.32193	TGME49_259950	APT	0.865645	1.12803	0.460517	RH	0.170837	0.057735	0.0333333	0.192115	0.310167	APT	ns	2.34116	NoSignificance		0	0	0	0	0	0	0	0	4	4
2.58496	0.237504	0.137504	2.32193	2	1.58496	1.58496	5.2854	2.32193	TGME49_251780	APT	2.51653	1.39605	0.569937	RH	0.986657	1.38508	0.799674	0.192156	0.310167	APT	ns	1.35082	NoSignificance		0	5	0	0	4	3	2	2	38	4
0.137504	0.237504	0.137504	0.137504	0.137504	0.137504	0.137504	2.32193	2.80735	TGME49_295990	APT	0.94655	1.26273	0.515509	RH	0.170837	0.057735	0.0333333	0.193029	0.310167	APT	ns	2.47006	NoSignificance	Ubiquitin-conjugating enzyme E2	1	0	0	0	0	0	0	0	4	6
0.137504	0.237504	0.137504	0.137504	0.137504	0.137504	0.137504	3	2.32193	TGME49_258640	APT	0.978657	1.32063	0.539146	RH	0.170837	0.057735	0.0333333	0.194601	0.310167	APT	ns	2.51818	NoSignificance		1	0	0	0	0	0	0	0	7	4
0.137504	0.237504	0.137504	0.137504	0.137504	0.137504	0.137504	3.58496	2.58496	TGME49_220350	APT	1.11999	1.55456	0.634648	RH	0.170837	0.057735	0.0333333	0.195216	0.310167	APT	ns	2.71279	NoSignificance		1	0	0	0	0	0	0	0	11	5
0.137504	0.237504	0.137504	0.137504	2	0.137504	0.137504	2.32193	0.137504	TGME49_270200	APT	0.81199	1.04986	0.428603	RH	0.170837	0.057735	0.0333333	0.195374	0.310167	APT	ns	2.24884	NoSignificance	Non-apicoplast	10	0	0	0	0	3	0	0	4	0
0.137504	0.237504	0.137504	0.137504	2	0.137504	0.137504	2	0.137504	TGME49_224890	APT	0.758336	0.961789	0.392649	RH	0.170837	0.057735	0.0333333	0.19538	0.310167	APT	ns	2.15022	NoSignificance		0	0	0	0	0	3	0	0	3	0
0.137504	0.237504	0.137504	0.137504	0.137504	0.137504	0.137504	2	2	TGME49_253350	APT	0.758336	0.961789	0.392649	RH	0.170837	0.057735	0.0333333	0.19538	0.310167	APT	ns	2.15022	NoSignificance		0	0	0	0	0	0	0	0	3	3
0.137504	0.237504	0.137504	0.137504	2	0.137504	0.137504	2	0.137504	TGME49_219460	APT	0.758336	0.961789	0.392649	RH	0.170837	0.057735	0.0333333	0.19538	0.310167	APT	ns	2.15022	NoSignificance		0	0	0	0	0	3	0	0	3	0
0.137504	0.237504	0.137504	0.137504	0.137504	0.137504	0.137504	2	2	TGME49_247580	APT	0.758336	0.961789	0.392649	RH	0.170837	0.057735	0.0333333	0.19538	0.310167	APT	ns	2.15022	NoSignificance		1	0	0	0	0	0	0	0	3	3
0.137504	0.237504	0.137504	0.137504	0.137504	0.137504	0.137504	3.16993	2.32193	TGME49_221922	APT	1.00698	1.37342	0.560695	RH	0.170837	0.057735	0.0333333	0.196356	0.310167	APT	ns	2.55934	NoSignificance		0	0	0	0	0	0	0	0	8	4
0.137504	0.237504	0.137504	0.137504	2	0.137504	0.137504	2.58496	0.137504	TGME49_222070	APT	0.855829	1.1281	0.460543	RH	0.170837	0.057735	0.0333333	0.197472	0.310167	APT	ns	2.3247	NoSignificance		0	0	0	0	0	3	0	0	5	0
0.137504	0.237504	0.137504	0.137504	0.137504	0.137504	0.137504	2.58496	2	TGME49_307610	APT	0.855829	1.1281	0.460543	RH	0.170837	0.057735	0.0333333	0.197472	0.310167	APT	ns	2.3247	NoSignificance		0	0	0	0	0	0	0	0	5	3
0.137504	0.237504	0.137504	0.137504	0.137504	0.137504	0.137504	2.58496	2	TGME49_236190	APT	0.855829	1.1281	0.460543	RH	0.170837	0.057735	0.0333333	0.197472	0.310167	APT	ns	2.3247	NoSignificance		1	0	0	0	0	0	0	0	5	3
0.137504	0.237504	0.137504	0.137504	0.137504	0.137504	0.137504	2.80735	2	TGME49_214620	APT	0.892895	1.19777	0.488989	RH	0.170837	0.057735	0.0333333	0.200164	0.310167	APT	ns	2.38587	NoSignificance		0	0	0	0	0	0	0	0	6	3
0.137504	0.237504	0.137504	0.137504	0.137504	0.137504	0.137504	2.80735	2	TGME49_240430	APT	0.892895	1.19777	0.488989	RH	0.170837	0.057735	0.0333333	0.200164	0.310167	APT	ns	2.38587	NoSignificance		0	0	0	0	0	0	0	0	6	3
0.137504	0.237504	0.137504	0.137504	0.137504	0.137504	0.137504	2.80735	2	TGME49_297780	APT	0.892895	1.19777	0.488989	RH	0.170837	0.057735	0.0333333	0.200164	0.310167	APT	ns	2.38587	NoSignificance	GyraseB	0	0	0	0	0	0	0	0	6	3
0.137504	0.237504	0.137504	0.137504	2.58496	0.137504	0.137504	4.08746	0.137504	TGME49_210700	APT	1.20374	1.71878	0.70169	RH	0.170837	0.057735	0.0333333	0.201167	0.310167	APT	ns	2.81683	NoSignificance		0	0	0	0	0	5	0	0	16	0
0.137504	0.237504	0.137504	1.58496	1.58496	0.137504	0.137504	0.137504	0.137504	TGME49_227620	APT	0.61999	0.747465	0.305151	RH	0.170837	0.057735	0.0333333	0.201969	0.310167	APT	ns	1.85963	NoSignificance		0	0	0	0	2	2	0	0	0	0
0.137504	0.237504	0.137504	0.137504	0.137504	0.137504	0.137504	1.58496	1.58496	TGME49_313380	APT	0.61999	0.747465	0.305151	RH	0.170837	0.057735	0.0333333	0.201969	0.310167	APT	ns	1.85963	NoSignificance		0	0	0	0	0	0	0	0	2	2
0.137504	0.237504	0.137504	0.137504	0.137504	0.137504	0.137504	1.58496	1.58496	TGME49_240520	APT	0.61999	0.747465	0.305151	RH	0.170837	0.057735	0.0333333	0.201969	0.310167	APT	ns	1.85963	NoSignificance		1	0	0	0	0	0	0	0	2	2
0.137504	0.237504	0.137504	0.137504	1.58496	0.137504	0.137504	1.58496	0.137504	TGME49_285220	APT	0.61999	0.747465	0.305151	RH	0.170837	0.057735	0.0333333	0.201969	0.310167	APT	ns	1.85963	NoSignificance		0	0	0	0	0	2	0	0	2	0
0.137504	0.237504	0.137504	0.137504	0.137504	0.137504	0.137504	1.58496	1.58496	TGME49_314460	APT	0.61999	0.747465	0.305151	RH	0.170837	0.057735	0.0333333	0.201969	0.310167	APT	ns	1.85963	NoSignificance		1	0	0	0	0	0	0	0	2	2
0.137504	0.237504	0.137504	0.137504	0.137504	0.137504	0.137504	1.58496	1.58496	TGME49_220890	APT	0.61999	0.747465	0.305151	RH	0.170837	0.057735	0.0333333	0.201969	0.310167	APT	ns	1.85963	NoSignificance		1	0	0	0	0	0	0	0	2	2
0.137504	0.237504	0.137504	0.137504	1.58496	0.137504	0.137504	1.58496	0.137504	TGME49_216900	APT	0.61999	0.747465	0.305151	RH	0.170837	0.057735	0.0333333	0.201969	0.310167	APT	ns	1.85963	NoSignificance		0	0	0	0	0	2	0	0	2	0
0.137504	0.237504	0.137504	1.58496	0.137504	0.137504	0.137504	2	0.137504	TGME49_294250	APT	0.689163	0.864646	0.35299	RH	0.170837	0.057735	0.0333333	0.202636	0.310167	APT	ns	2.01223	NoSignificance		1	0	0	0	2	0	0	0	3	0
0.137504	0.237504	0.137504	0.137504	2	0.137504	0.137504	0.137504	1.58496	TGME49_295125	APT	0.689163	0.864646	0.35299	RH	0.170837	0.057735	0.0333333	0.202636	0.310167	APT	ns	2.01223	NoSignificance		1	0	0	0	0	3	0	0	0	2
0.137504	0.237504	0.137504	0.137504	0.137504	0.137504	0.137504	2	1.58496	TGME49_243290	APT	0.689163	0.864646	0.35299	RH	0.170837	0.057735	0.0333333	0.202636	0.310167	APT	ns	2.01223	NoSignificance		1	0	0	0	0	0	0	0	3	2
0.137504	0.237504	0.137504	0.137504	0.137504	0.137504	0.137504	2	1.58496	TGME49_224350	APT	0.689163	0.864646	0.35299	RH	0.170837	0.057735	0.0333333	0.202636	0.310167	APT	ns	2.01223	NoSignificance		1	0	0	0	0	0	0	0	3	2
0.137504	0.237504	0.137504	0.137504	0.137504	0.137504	0.137504	2	1.58496	TGME49_225800	APT	0.689163	0.864646	0.35299	RH	0.170837	0.057735	0.0333333	0.202636	0.310167	APT	ns	2.01223	NoSignificance		0	0	0	0	0	0	0	0	3	2
0.137504	0.237504	0.137504	0.137504	1.58496	0.137504	0.137504	2	0.137504	TGME49_315770	APT	0.689163	0.864646	0.35299	RH	0.170837	0.057735	0.0333333	0.202636	0.310167	APT	ns	2.01223	NoSignificance		1	0	0	0	0	2	0	0	3	0
0.137504	0.237504	0.137504	0.137504	0.137504	0.137504	0.137504	2	1.58496	TGME49_289230	APT	0.689163	0.864646	0.35299	RH	0.170837	0.057735	0.0333333	0.202636	0.310167	APT	ns	2.01223	NoSignificance		0	0	0	0	0	0	0	0	3	2
0.137504	0.237504	0.137504	0.137504	1.58496	0.137504	0.137504	2	0.137504	TGME49_215940	APT	0.689163	0.864646	0.35299	RH	0.170837	0.057735	0.0333333	0.202636	0.310167	APT	ns	2.01223	NoSignificance	apicoplast	9	0	0	0	0	2	0	0	3	0
0.137504	0.237504	0.137504	0.137504	0.137504	0.137504	0.137504	2	1.58496	TGME49_325800	APT	0.689163	0.864646	0.35299	RH	0.170837	0.057735	0.0333333	0.202636	0.310167	APT	ns	2.01223	NoSignificance		0	0	0	0	0	0	0	0	3	2
0.137504	0.237504	0.137504	0.137504	2	0.137504	0.137504	1.58496	0.137504	TGME49_206300	APT	0.689163	0.864646	0.35299	RH	0.170837	0.057735	0.0333333	0.202636	0.310167	APT	ns	2.01223	NoSignificance		0	0	0	0	0	3	0	0	2	0
0.137504	0.237504	0.137504	0.137504	1.58496	0.137504	0.137504	2	0.137504	TGME49_314070	APT	0.689163	0.864646	0.35299	RH	0.170837	0.057735	0.0333333	0.202636	0.310167	APT	ns	2.01223	NoSignificance		0	0	0	0	0	2	0	0	3	0
0.137504	0.237504	0.137504	0.137504	1.58496	0.137504	0.137504	2	0.137504	TGME49_259660	APT	0.689163	0.864646	0.35299	RH	0.170837	0.057735	0.0333333	0.202636	0.310167	APT	ns	2.01223	NoSignificance		0	0	0	0	0	2	0	0	3	0
0.137504	0.237504	0.137504	0.137504	0.137504	0.137504	0.137504	3	2	TGME49_239680	APT	0.925002	1.26031	0.514518	RH	0.170837	0.057735	0.0333333	0.202938	0.310167	APT	ns	2.43684	NoSignificance	hypothetical protein	1	0	0	0	0	0	0	0	7	3
0.137504	0.237504	0.137504	0.137504	0.137504	0.137504	0.137504	3	2	TGME49_223125	APT	0.925002	1.26031	0.514518	RH	0.170837	0.057735	0.0333333	0.202938	0.310167	APT	ns	2.43684	NoSignificance		1	0	0	0	0	0	0	0	7	3
0.137504	0.237504	0.137504	0.137504	1.58496	0.137504	0.137504	2.32193	0.137504	TGME49_249550	APT	0.742817	0.966273	0.394479	RH	0.170837	0.057735	0.0333333	0.207336	0.310167	APT	ns	2.12039	NoSignificance		0	0	0	0	0	2	0	0	4	0
0.137504	0.237504	0.137504	0.137504	0.137504	0.137504	0.137504	2.32193	1.58496	TGME49_239320	APT	0.742817	0.966273	0.394479	RH	0.170837	0.057735	0.0333333	0.207336	0.310167	APT	ns	2.12039	NoSignificance	BolA family protein	1	0	0	0	0	0	0	0	4	2
0.137504	0.237504	0.137504	0.137504	0.137504	0.137504	0.137504	2.32193	1.58496	TGME49_244700	APT	0.742817	0.966273	0.394479	RH	0.170837	0.057735	0.0333333	0.207336	0.310167	APT	ns	2.12039	NoSignificance		0	0	0	0	0	0	0	0	4	2
0.137504	0.237504	0.137504	0.137504	0.137504	0.137504	0.137504	2.32193	1.58496	TGME49_257170	APT	0.742817	0.966273	0.394479	RH	0.170837	0.057735	0.0333333	0.207336	0.310167	APT	ns	2.12039	NoSignificance		0	0	0	0	0	0	0	0	4	2
0.137504	0.237504	0.137504	0.137504	0.137504	0.137504	0.137504	2.32193	1.58496	TGME49_221330	APT	0.742817	0.966273	0.394479	RH	0.170837	0.057735	0.0333333	0.207336	0.310167	APT	ns	2.12039	NoSignificance	TgGyrA	0	0	0	0	0	0	0	0	4	2
0.137504	0.237504	0.137504	0.137504	0.137504	0.137504	0.137504	2.32193	1.58496	TGME49_251500	APT	0.742817	0.966273	0.394479	RH	0.170837	0.057735	0.0333333	0.207336	0.310167	APT	ns	2.12039	NoSignificance		0	0	0	0	0	0	0	0	4	2
0.137504	0.237504	0.137504	0.137504	2.58496	0.137504	0.137504	1.58496	0.137504	TGME49_256760	APT	0.786657	1.05421	0.430379	RH	0.170837	0.057735	0.0333333	0.212372	0.310167	APT	ns	2.20311	NoSignificance		0	0	0	0	0	5	0	0	2	0
0.137504	0.237504	0.137504	0.137504	1.58496	0.137504	0.137504	2.58496	0.137504	TGME49_263070	APT	0.786657	1.05421	0.430379	RH	0.170837	0.057735	0.0333333	0.212372	0.310167	APT	ns	2.20311	NoSignificance		0	0	0	0	0	2	0	0	5	0
0.137504	0.237504	0.137504	0.137504	1.58496	0.137504	0.137504	2.58496	0.137504	TGME49_228750	APT	0.786657	1.05421	0.430379	RH	0.170837	0.057735	0.0333333	0.212372	0.310167	APT	ns	2.20311	NoSignificance		0	0	0	0	0	2	0	0	5	0
0.137504	0.237504	0.137504	0.137504	1.58496	0.137504	0.137504	2.58496	0.137504	TGME49_214090	APT	0.786657	1.05421	0.430379	RH	0.170837	0.057735	0.0333333	0.212372	0.310167	APT	ns	2.20311	NoSignificance		0	0	0	0	0	2	0	0	5	0
0.137504	0.237504	0.137504	0.137504	0.137504	0.137504	0.137504	2.58496	1.58496	TGME49_264200	APT	0.786657	1.05421	0.430379	RH	0.170837	0.057735	0.0333333	0.212372	0.310167	APT	ns	2.20311	NoSignificance		2	0	0	0	0	0	0	0	5	2
0.137504	0.237504	0.137504	0.137504	0.137504	0.137504	0.137504	2.58496	1.58496	TGME49_206610	APT	0.786657	1.05421	0.430379	RH	0.170837	0.057735	0.0333333	0.212372	0.310167	APT	ns	2.20311	NoSignificance	PDH E2	0	0	0	0	0	0	0	0	5	2
0.137504	0.237504	0.137504	0.137504	0.137504	0.137504	0.137504	2.58496	1.58496	TGME49_216630	APT	0.786657	1.05421	0.430379	RH	0.170837	0.057735	0.0333333	0.212372	0.310167	APT	ns	2.20311	NoSignificance		0	0	0	0	0	0	0	0	5	2
0.137504	0.237504	0.137504	0.137504	1.58496	0.137504	0.137504	2.58496	0.137504	TGME49_294670	APT	0.786657	1.05421	0.430379	RH	0.170837	0.057735	0.0333333	0.212372	0.310167	APT	ns	2.20311	NoSignificance		0	0	0	0	0	2	0	0	5	0
0.137504	0.237504	0.137504	0.137504	0.137504	0.137504	0.137504	2.58496	1.58496	TGME49_213072	APT	0.786657	1.05421	0.430379	RH	0.170837	0.057735	0.0333333	0.212372	0.310167	APT	ns	2.20311	NoSignificance		0	0	0	0	0	0	0	0	5	2
0.137504	0.237504	0.137504	0.137504	0.137504	0.137504	0.137504	3.58496	2	TGME49_299070	APT	1.0225	1.45977	0.595947	RH	0.170837	0.057735	0.0333333	0.212618	0.310167	APT	ns	2.5814	NoSignificance	Pyruvate kinase II	1	0	0	0	0	0	0	0	11	3
0.137504	0.237504	0.137504	0.137504	0.137504	0.137504	0.137504	2.80735	1.58496	TGME49_208830	APT	0.823722	1.13118	0.461803	RH	0.170837	0.057735	0.0333333	0.217003	0.310167	APT	ns	2.26954	NoSignificance		0	0	0	0	0	0	0	0	6	2
0.137504	0.237504	0.137504	0.137504	0.137504	0.137504	0.137504	2.80735	1.58496	TGME49_251590	APT	0.823722	1.13118	0.461803	RH	0.170837	0.057735	0.0333333	0.217003	0.310167	APT	ns	2.26954	NoSignificance		0	0	0	0	0	0	0	0	6	2
0.137504	0.237504	0.137504	0.137504	0.137504	0.137504	0.137504	2.80735	1.58496	TGME49_301380	APT	0.823722	1.13118	0.461803	RH	0.170837	0.057735	0.0333333	0.217003	0.310167	APT	ns	2.26954	NoSignificance		0	0	0	0	0	0	0	0	6	2
1	0.237504	0.137504	1.58496	1.58496	0.137504	0.137504	1.58496	1	TGME49_313390	APT	1.00498	0.709111	0.289494	RH	0.458336	0.471752	0.272366	0.218141	0.310167	APT	ns	1.13269	NoSignificance		0	1	0	0	2	2	0	0	2	1
1	0.237504	0.137504	1.58496	1.58496	0.137504	0.137504	1.58496	1	TGME49_238010	APT	1.00498	0.709111	0.289494	RH	0.458336	0.471752	0.272366	0.218141	0.310167	APT	ns	1.13269	NoSignificance		0	1	0	0	2	2	0	0	2	1
1	0.237504	0.137504	1	1.58496	0.137504	0.137504	1.58496	1.58496	TGME49_239760	APT	1.00498	0.709111	0.289494	RH	0.458336	0.471752	0.272366	0.218141	0.310167	APT	ns	1.13269	NoSignificance		0	1	0	0	1	2	0	0	2	2
0.137504	0.237504	0.137504	0.137504	0.137504	0.137504	0.137504	3	1.58496	TGME49_294630	APT	0.855829	1.19942	0.489662	RH	0.170837	0.057735	0.0333333	0.221115	0.310167	APT	ns	2.3247	NoSignificance		0	0	0	0	0	0	0	0	7	2
0.137504	0.237504	0.137504	0.137504	0.137504	0.137504	0.137504	3	1.58496	TGME49_253890	APT	0.855829	1.19942	0.489662	RH	0.170837	0.057735	0.0333333	0.221115	0.310167	APT	ns	2.3247	NoSignificance		0	0	0	0	0	0	0	0	7	2
1	0.237504	0.137504	0.137504	1	0.137504	0.137504	4.45943	4.16993	TGME49_310430	APT	1.67364	2.07485	0.847054	RH	0.458336	0.471752	0.272366	0.22152	0.310167	APT	ns	1.86852	NoSignificance		0	1	0	0	0	1	0	0	21	17
0.137504	0.237504	0.137504	1.58496	1	0.137504	0.137504	0.137504	0.137504	TGME49_239330	APT	0.522496	0.624455	0.254933	RH	0.170837	0.057735	0.0333333	0.227855	0.310167	APT	ns	1.6128	NoSignificance		0	0	0	0	2	1	0	0	0	0
0.137504	0.237504	0.137504	1.58496	1	0.137504	0.137504	0.137504	0.137504	TGME49_291960	APT	0.522496	0.624455	0.254933	RH	0.170837	0.057735	0.0333333	0.227855	0.310167	APT	ns	1.6128	NoSignificance		0	0	0	0	2	1	0	0	0	0
0.137504	0.237504	0.137504	1.58496	1	0.137504	0.137504	0.137504	0.137504	TGME49_201840	APT	0.522496	0.624455	0.254933	RH	0.170837	0.057735	0.0333333	0.227855	0.310167	APT	ns	1.6128	NoSignificance		1	0	0	0	2	1	0	0	0	0
0.137504	0.237504	0.137504	1	1.58496	0.137504	0.137504	0.137504	0.137504	TGME49_217460	APT	0.522496	0.624455	0.254933	RH	0.170837	0.057735	0.0333333	0.227855	0.310167	APT	ns	1.6128	NoSignificance		0	0	0	0	1	2	0	0	0	0
0.137504	0.237504	0.137504	1	1.58496	0.137504	0.137504	0.137504	0.137504	TGME49_205250	APT	0.522496	0.624455	0.254933	RH	0.170837	0.057735	0.0333333	0.227855	0.310167	APT	ns	1.6128	NoSignificance		1	0	0	0	1	2	0	0	0	0
0.137504	0.237504	0.137504	1	0.137504	0.137504	0.137504	1.58496	0.137504	TGME49_224060	APT	0.522496	0.624455	0.254933	RH	0.170837	0.057735	0.0333333	0.227855	0.310167	APT	ns	1.6128	NoSignificance		0	0	0	0	1	0	0	0	2	0
0.137504	0.237504	0.137504	1	0.137504	0.137504	0.137504	1.58496	0.137504	TGME49_310140	APT	0.522496	0.624455	0.254933	RH	0.170837	0.057735	0.0333333	0.227855	0.310167	APT	ns	1.6128	NoSignificance	Non-apicoplast	9	0	0	0	1	0	0	0	2	0
0.137504	0.237504	0.137504	1	0.137504	0.137504	0.137504	1.58496	0.137504	TGME49_221180	APT	0.522496	0.624455	0.254933	RH	0.170837	0.057735	0.0333333	0.227855	0.310167	APT	ns	1.6128	NoSignificance		5	0	0	0	1	0	0	0	2	0
0.137504	0.237504	0.137504	1	1.58496	0.137504	0.137504	0.137504	0.137504	TGME49_223140	APT	0.522496	0.624455	0.254933	RH	0.170837	0.057735	0.0333333	0.227855	0.310167	APT	ns	1.6128	NoSignificance		0	0	0	0	1	2	0	0	0	0
0.137504	0.237504	0.137504	1	0.137504	0.137504	0.137504	1.58496	0.137504	TGME49_267080	APT	0.522496	0.624455	0.254933	RH	0.170837	0.057735	0.0333333	0.227855	0.310167	APT	ns	1.6128	NoSignificance		0	0	0	0	1	0	0	0	2	0
0.137504	0.237504	0.137504	0.137504	1.58496	0.137504	0.137504	1	0.137504	TGME49_202690	APT	0.522496	0.624455	0.254933	RH	0.170837	0.057735	0.0333333	0.227855	0.310167	APT	ns	1.6128	NoSignificance		0	0	0	0	0	2	0	0	1	0
0.137504	0.237504	0.137504	0.137504	1	0.137504	0.137504	1.58496	0.137504	TGME49_233905	APT	0.522496	0.624455	0.254933	RH	0.170837	0.057735	0.0333333	0.227855	0.310167	APT	ns	1.6128	NoSignificance		0	0	0	0	0	1	0	0	2	0
0.137504	0.237504	0.137504	0.137504	1	0.137504	0.137504	1.58496	0.137504	TGME49_300260	APT	0.522496	0.624455	0.254933	RH	0.170837	0.057735	0.0333333	0.227855	0.310167	APT	ns	1.6128	NoSignificance		0	0	0	0	0	1	0	0	2	0
0.137504	0.237504	0.137504	0.137504	1	0.137504	0.137504	1.58496	0.137504	TGME49_262910	APT	0.522496	0.624455	0.254933	RH	0.170837	0.057735	0.0333333	0.227855	0.310167	APT	ns	1.6128	NoSignificance		1	0	0	0	0	1	0	0	2	0
0.137504	0.237504	0.137504	0.137504	1	0.137504	0.137504	1.58496	0.137504	TGME49_236840	APT	0.522496	0.624455	0.254933	RH	0.170837	0.057735	0.0333333	0.227855	0.310167	APT	ns	1.6128	NoSignificance		0	0	0	0	0	1	0	0	2	0
0.137504	0.237504	0.137504	0.137504	1	0.137504	0.137504	1.58496	0.137504	TGME49_232280	APT	0.522496	0.624455	0.254933	RH	0.170837	0.057735	0.0333333	0.227855	0.310167	APT	ns	1.6128	NoSignificance		0	0	0	0	0	1	0	0	2	0
0.137504	0.237504	0.137504	0.137504	1	0.137504	0.137504	1.58496	0.137504	TGME49_230140	APT	0.522496	0.624455	0.254933	RH	0.170837	0.057735	0.0333333	0.227855	0.310167	APT	ns	1.6128	NoSignificance		0	0	0	0	0	1	0	0	2	0
0.137504	0.237504	0.137504	0.137504	0.137504	0.137504	0.137504	1.58496	1	TGME49_268690	APT	0.522496	0.624455	0.254933	RH	0.170837	0.057735	0.0333333	0.227855	0.310167	APT	ns	1.6128	NoSignificance		1	0	0	0	0	0	0	0	2	1
0.137504	0.237504	0.137504	0.137504	1	0.137504	0.137504	1.58496	0.137504	TGME49_297220	APT	0.522496	0.624455	0.254933	RH	0.170837	0.057735	0.0333333	0.227855	0.310167	APT	ns	1.6128	NoSignificance		0	0	0	0	0	1	0	0	2	0
0.137504	0.237504	0.137504	0.137504	0.137504	0.137504	0.137504	1.58496	1	TGME49_273370	APT	0.522496	0.624455	0.254933	RH	0.170837	0.057735	0.0333333	0.227855	0.310167	APT	ns	1.6128	NoSignificance		0	0	0	0	0	0	0	0	2	1
0.137504	0.237504	0.137504	0.137504	1	0.137504	0.137504	1.58496	0.137504	TGME49_239620	APT	0.522496	0.624455	0.254933	RH	0.170837	0.057735	0.0333333	0.227855	0.310167	APT	ns	1.6128	NoSignificance		0	0	0	0	0	1	0	0	2	0
0.137504	0.237504	0.137504	0.137504	0.137504	0.137504	0.137504	1.58496	1	TGME49_254770	APT	0.522496	0.624455	0.254933	RH	0.170837	0.057735	0.0333333	0.227855	0.310167	APT	ns	1.6128	NoSignificance		0	0	0	0	0	0	0	0	2	1
0.137504	0.237504	0.137504	0.137504	0.137504	0.137504	0.137504	1.58496	1	TGME49_248300	APT	0.522496	0.624455	0.254933	RH	0.170837	0.057735	0.0333333	0.227855	0.310167	APT	ns	1.6128	NoSignificance		1	0	0	0	0	0	0	0	2	1
0.137504	0.237504	0.137504	0.137504	0.137504	0.137504	0.137504	1.58496	1	TGME49_299780	APT	0.522496	0.624455	0.254933	RH	0.170837	0.057735	0.0333333	0.227855	0.310167	APT	ns	1.6128	NoSignificance		3	0	0	0	0	0	0	0	2	1
0.137504	0.237504	0.137504	0.137504	0.137504	0.137504	1	1.58496	0.137504	TGME49_278780	APT	0.522496	0.624455	0.254933	RH	0.170837	0.057735	0.0333333	0.227855	0.310167	APT	ns	1.6128	NoSignificance		0	0	0	0	0	0	0	1	2	0
0.137504	0.237504	0.137504	0.137504	1	0.137504	0.137504	1.58496	0.137504	TGME49_219850	APT	0.522496	0.624455	0.254933	RH	0.170837	0.057735	0.0333333	0.227855	0.310167	APT	ns	1.6128	NoSignificance		0	0	0	0	0	1	0	0	2	0
0.137504	0.237504	0.137504	0.137504	1	0.137504	0.137504	1.58496	0.137504	TGME49_289190	APT	0.522496	0.624455	0.254933	RH	0.170837	0.057735	0.0333333	0.227855	0.310167	APT	ns	1.6128	NoSignificance		0	0	0	0	0	1	0	0	2	0
0.137504	0.237504	0.137504	0.137504	1	0.137504	0.137504	1.58496	0.137504	TGME49_294620	APT	0.522496	0.624455	0.254933	RH	0.170837	0.057735	0.0333333	0.227855	0.310167	APT	ns	1.6128	NoSignificance		0	0	0	0	0	1	0	0	2	0
0.137504	0.237504	0.137504	0.137504	0.137504	0.137504	0.137504	1.58496	1	TGME49_227150	APT	0.522496	0.624455	0.254933	RH	0.170837	0.057735	0.0333333	0.227855	0.310167	APT	ns	1.6128	NoSignificance		0	0	0	0	0	0	0	0	2	1
0.137504	0.237504	0.137504	0.137504	0.137504	0.137504	0.137504	1.58496	1	TGME49_308920	APT	0.522496	0.624455	0.254933	RH	0.170837	0.057735	0.0333333	0.227855	0.310167	APT	ns	1.6128	NoSignificance		0	0	0	0	0	0	0	0	2	1
0.137504	0.237504	0.137504	0.137504	0.137504	0.137504	0.137504	1.58496	1	TGME49_297925	APT	0.522496	0.624455	0.254933	RH	0.170837	0.057735	0.0333333	0.227855	0.310167	APT	ns	1.6128	NoSignificance		0	0	0	0	0	0	0	0	2	1
0.137504	0.237504	0.137504	0.137504	1	0.137504	0.137504	1.58496	0.137504	TGME49_318510	APT	0.522496	0.624455	0.254933	RH	0.170837	0.057735	0.0333333	0.227855	0.310167	APT	ns	1.6128	NoSignificance		0	0	0	0	0	1	0	0	2	0
0.137504	0.237504	0.137504	0.137504	0.137504	0.137504	0.137504	1.58496	1	TGME49_291670	APT	0.522496	0.624455	0.254933	RH	0.170837	0.057735	0.0333333	0.227855	0.310167	APT	ns	1.6128	NoSignificance	DEAD/DEAH box helicase domain-containing protein	0	0	0	0	0	0	0	0	2	1
0.137504	0.237504	0.137504	0.137504	1	0.137504	0.137504	1.58496	0.137504	TGME49_236860	APT	0.522496	0.624455	0.254933	RH	0.170837	0.057735	0.0333333	0.227855	0.310167	APT	ns	1.6128	NoSignificance		12	0	0	0	0	1	0	0	2	0
0.137504	0.237504	0.137504	0.137504	1	0.137504	0.137504	1.58496	0.137504	TGME49_207640	APT	0.522496	0.624455	0.254933	RH	0.170837	0.057735	0.0333333	0.227855	0.310167	APT	ns	1.6128	NoSignificance		0	0	0	0	0	1	0	0	2	0
0.137504	0.237504	0.137504	0.137504	1	0.137504	0.137504	1.58496	0.137504	TGME49_215260	APT	0.522496	0.624455	0.254933	RH	0.170837	0.057735	0.0333333	0.227855	0.310167	APT	ns	1.6128	NoSignificance		0	0	0	0	0	1	0	0	2	0
0.137504	0.237504	0.137504	0.137504	1	0.137504	0.137504	1.58496	0.137504	TGME49_262050	APT	0.522496	0.624455	0.254933	RH	0.170837	0.057735	0.0333333	0.227855	0.310167	APT	ns	1.6128	NoSignificance		0	0	0	0	0	1	0	0	2	0
0.137504	0.237504	0.137504	0.137504	1	0.137504	0.137504	1.58496	0.137504	TGME49_294898	APT	0.522496	0.624455	0.254933	RH	0.170837	0.057735	0.0333333	0.227855	0.310167	APT	ns	1.6128	NoSignificance		0	0	0	0	0	1	0	0	2	0
0.137504	0.237504	0.137504	0.137504	1	0.137504	0.137504	1.58496	0.137504	TGME49_230210	APT	0.522496	0.624455	0.254933	RH	0.170837	0.057735	0.0333333	0.227855	0.310167	APT	ns	1.6128	NoSignificance		0	0	0	0	0	1	0	0	2	0
0.137504	0.237504	0.137504	0.137504	0.137504	0.137504	0.137504	1.58496	1	TGME49_276210	APT	0.522496	0.624455	0.254933	RH	0.170837	0.057735	0.0333333	0.227855	0.310167	APT	ns	1.6128	NoSignificance		0	0	0	0	0	0	0	0	2	1
0.137504	0.237504	0.137504	0.137504	0.137504	0.137504	0.137504	1.58496	1	TGME49_315860	APT	0.522496	0.624455	0.254933	RH	0.170837	0.057735	0.0333333	0.227855	0.310167	APT	ns	1.6128	NoSignificance		0	0	0	0	0	0	0	0	2	1
0.137504	0.237504	0.137504	0.137504	1	0.137504	0.137504	1.58496	0.137504	TGME49_219250	APT	0.522496	0.624455	0.254933	RH	0.170837	0.057735	0.0333333	0.227855	0.310167	APT	ns	1.6128	NoSignificance		1	0	0	0	0	1	0	0	2	0
0.137504	0.237504	0.137504	0.137504	1.58496	0.137504	0.137504	1	0.137504	TGME49_308010	APT	0.522496	0.624455	0.254933	RH	0.170837	0.057735	0.0333333	0.227855	0.310167	APT	ns	1.6128	NoSignificance		0	0	0	0	0	2	0	0	1	0
0.137504	0.237504	0.137504	0.137504	1.58496	0.137504	0.137504	1	0.137504	TGME49_228400	APT	0.522496	0.624455	0.254933	RH	0.170837	0.057735	0.0333333	0.227855	0.310167	APT	ns	1.6128	NoSignificance		0	0	0	0	0	2	0	0	1	0
0.137504	0.237504	0.137504	0.137504	1.58496	0.137504	0.137504	1	0.137504	TGME49_299210	APT	0.522496	0.624455	0.254933	RH	0.170837	0.057735	0.0333333	0.227855	0.310167	APT	ns	1.6128	NoSignificance		0	0	0	0	0	2	0	0	1	0
0.137504	0.237504	0.137504	0.137504	1.58496	0.137504	0.137504	1	0.137504	TGME49_311430	APT	0.522496	0.624455	0.254933	RH	0.170837	0.057735	0.0333333	0.227855	0.310167	APT	ns	1.6128	NoSignificance		0	0	0	0	0	2	0	0	1	0
0.137504	0.237504	0.137504	0.137504	0.137504	0.137504	0.137504	1	1.58496	TGME49_248770	APT	0.522496	0.624455	0.254933	RH	0.170837	0.057735	0.0333333	0.227855	0.310167	APT	ns	1.6128	NoSignificance		0	0	0	0	0	0	0	0	1	2
0.137504	0.237504	0.137504	0.137504	1.58496	0.137504	0.137504	1	0.137504	TGME49_292080	APT	0.522496	0.624455	0.254933	RH	0.170837	0.057735	0.0333333	0.227855	0.310167	APT	ns	1.6128	NoSignificance		0	0	0	0	0	2	0	0	1	0
0.137504	0.237504	0.137504	0.137504	1.58496	0.137504	0.137504	1	0.137504	TGME49_236910	APT	0.522496	0.624455	0.254933	RH	0.170837	0.057735	0.0333333	0.227855	0.310167	APT	ns	1.6128	NoSignificance		0	0	0	0	0	2	0	0	1	0
0.137504	0.237504	0.137504	0.137504	0.137504	0.137504	0.137504	1	1.58496	TGME49_243730	APT	0.522496	0.624455	0.254933	RH	0.170837	0.057735	0.0333333	0.227855	0.310167	APT	ns	1.6128	NoSignificance		0	0	0	0	0	0	0	0	1	2
0.137504	0.237504	0.137504	0.137504	1.58496	0.137504	0.137504	1	0.137504	TGME49_279380	APT	0.522496	0.624455	0.254933	RH	0.170837	0.057735	0.0333333	0.227855	0.310167	APT	ns	1.6128	NoSignificance		0	0	0	0	0	2	0	0	1	0
0.137504	0.237504	0.137504	0.137504	1.58496	0.137504	0.137504	0.137504	1	TGME49_219320	APT	0.522496	0.624455	0.254933	RH	0.170837	0.057735	0.0333333	0.227855	0.310167	APT	ns	1.6128	NoSignificance		2	0	0	0	0	2	0	0	0	1
0.137504	0.237504	0.137504	0.137504	1.58496	0.137504	0.137504	3.58496	0.137504	TGME49_287970	APT	0.953323	1.41328	0.576967	RH	0.170837	0.057735	0.0333333	0.23337	0.317154	APT	ns	2.48035	NoSignificance		0	0	0	0	0	2	0	0	11	0
0.137504	0.237504	0.137504	1	0.137504	0.137504	0.137504	2	0.137504	TGME49_223620	APT	0.591669	0.771388	0.314918	RH	0.170837	0.057735	0.0333333	0.240116	0.317981	APT	ns	1.79217	NoSignificance		1	0	0	0	1	0	0	0	3	0
0.137504	0.237504	0.137504	1	0.137504	0.137504	0.137504	2	0.137504	TGME49_264440	APT	0.591669	0.771388	0.314918	RH	0.170837	0.057735	0.0333333	0.240116	0.317981	APT	ns	1.79217	NoSignificance		1	0	0	0	1	0	0	0	3	0
0.137504	0.237504	0.137504	1	0.137504	0.137504	0.137504	2	0.137504	TGME49_312380	APT	0.591669	0.771388	0.314918	RH	0.170837	0.057735	0.0333333	0.240116	0.317981	APT	ns	1.79217	NoSignificance		0	0	0	0	1	0	0	0	3	0
0.137504	0.237504	0.137504	0.137504	1	0.137504	0.137504	2	0.137504	TGME49_313140	APT	0.591669	0.771388	0.314918	RH	0.170837	0.057735	0.0333333	0.240116	0.317981	APT	ns	1.79217	NoSignificance		0	0	0	0	0	1	0	0	3	0
0.137504	0.237504	0.137504	0.137504	1	0.137504	0.137504	2	0.137504	TGME49_251690	APT	0.591669	0.771388	0.314918	RH	0.170837	0.057735	0.0333333	0.240116	0.317981	APT	ns	1.79217	NoSignificance		0	0	0	0	0	1	0	0	3	0
0.137504	0.237504	0.137504	0.137504	1	0.137504	0.137504	2	0.137504	TGME49_242830	APT	0.591669	0.771388	0.314918	RH	0.170837	0.057735	0.0333333	0.240116	0.317981	APT	ns	1.79217	NoSignificance		0	0	0	0	0	1	0	0	3	0
0.137504	0.237504	0.137504	0.137504	1	0.137504	0.137504	2	0.137504	TGME49_291680	APT	0.591669	0.771388	0.314918	RH	0.170837	0.057735	0.0333333	0.240116	0.317981	APT	ns	1.79217	NoSignificance		0	0	0	0	0	1	0	0	3	0
0.137504	0.237504	0.137504	0.137504	0.137504	0.137504	0.137504	2	1	TGME49_211440	APT	0.591669	0.771388	0.314918	RH	0.170837	0.057735	0.0333333	0.240116	0.317981	APT	ns	1.79217	NoSignificance	hypothetical protein	0	0	0	0	0	0	0	0	3	1
0.137504	0.237504	0.137504	0.137504	0.137504	0.137504	0.137504	2	1	TGME49_262040	APT	0.591669	0.771388	0.314918	RH	0.170837	0.057735	0.0333333	0.240116	0.317981	APT	ns	1.79217	NoSignificance		0	0	0	0	0	0	0	0	3	1
0.137504	0.237504	0.137504	0.137504	0.137504	0.137504	0.137504	2	1	TGME49_275470	APT	0.591669	0.771388	0.314918	RH	0.170837	0.057735	0.0333333	0.240116	0.317981	APT	ns	1.79217	NoSignificance		2	0	0	0	0	0	0	0	3	1
0.137504	0.237504	0.137504	0.137504	1	0.137504	0.137504	2	0.137504	TGME49_288830	APT	0.591669	0.771388	0.314918	RH	0.170837	0.057735	0.0333333	0.240116	0.317981	APT	ns	1.79217	NoSignificance		0	0	0	0	0	1	0	0	3	0
0.137504	0.237504	0.137504	0.137504	0.137504	0.137504	0.137504	2	1	TGME49_215070	APT	0.591669	0.771388	0.314918	RH	0.170837	0.057735	0.0333333	0.240116	0.317981	APT	ns	1.79217	NoSignificance	Plant-type ferredoxin	0	0	0	0	0	0	0	0	3	1
0.137504	0.237504	0.137504	0.137504	0.137504	0.137504	0.137504	2	1	TGME49_237460	APT	0.591669	0.771388	0.314918	RH	0.170837	0.057735	0.0333333	0.240116	0.317981	APT	ns	1.79217	NoSignificance		0	0	0	0	0	0	0	0	3	1
0.137504	0.237504	0.137504	0.137504	0.137504	0.137504	0.137504	2	1	TGME49_276970	APT	0.591669	0.771388	0.314918	RH	0.170837	0.057735	0.0333333	0.240116	0.317981	APT	ns	1.79217	NoSignificance		2	0	0	0	0	0	0	0	3	1
0.137504	0.237504	0.137504	0.137504	0.137504	0.137504	0.137504	2	1	TGME49_222270	APT	0.591669	0.771388	0.314918	RH	0.170837	0.057735	0.0333333	0.240116	0.317981	APT	ns	1.79217	NoSignificance		0	0	0	0	0	0	0	0	3	1
0.137504	0.237504	0.137504	0.137504	0.137504	0.137504	0.137504	2	1	TGME49_254880	APT	0.591669	0.771388	0.314918	RH	0.170837	0.057735	0.0333333	0.240116	0.317981	APT	ns	1.79217	NoSignificance		2	0	0	0	0	0	0	0	3	1
1	0.237504	0.137504	1	0.137504	0.137504	0.137504	3.80735	3.16993	TGME49_226400	APT	1.3983	1.66551	0.679943	RH	0.458336	0.471752	0.272366	0.244397	0.322826	APT	ns	1.6092	NoSignificance	Lipoate synthase LipA	0	1	0	0	1	0	0	0	13	8
0.137504	0.237504	0.137504	0.137504	1.58496	0.137504	0.137504	4.16993	0.137504	TGME49_288500	APT	1.05082	1.63406	0.667101	RH	0.170837	0.057735	0.0333333	0.244553	0.322826	APT	ns	2.62082	NoSignificance		0	0	0	0	0	2	0	0	17	0
0.137504	0.237504	0.137504	0.137504	1	0.137504	0.137504	2.32193	0.137504	TGME49_289600	APT	0.645324	0.890879	0.3637	RH	0.170837	0.057735	0.0333333	0.249687	0.324437	APT	ns	1.9174	NoSignificance		0	0	0	0	0	1	0	0	4	0
0.137504	0.237504	0.137504	0.137504	1	0.137504	0.137504	2.32193	0.137504	TGME49_249860	APT	0.645324	0.890879	0.3637	RH	0.170837	0.057735	0.0333333	0.249687	0.324437	APT	ns	1.9174	NoSignificance		0	0	0	0	0	1	0	0	4	0
0.137504	0.237504	0.137504	0.137504	1	0.137504	0.137504	2.32193	0.137504	TGME49_298610	APT	0.645324	0.890879	0.3637	RH	0.170837	0.057735	0.0333333	0.249687	0.324437	APT	ns	1.9174	NoSignificance		0	0	0	0	0	1	0	0	4	0
0.137504	0.237504	0.137504	0.137504	1	0.137504	0.137504	2.32193	0.137504	TGME49_280370	APT	0.645324	0.890879	0.3637	RH	0.170837	0.057735	0.0333333	0.249687	0.324437	APT	ns	1.9174	NoSignificance		0	0	0	0	0	1	0	0	4	0
0.137504	0.237504	0.137504	0.137504	1	0.137504	0.137504	2.32193	0.137504	TGME49_314100	APT	0.645324	0.890879	0.3637	RH	0.170837	0.057735	0.0333333	0.249687	0.324437	APT	ns	1.9174	NoSignificance		0	0	0	0	0	1	0	0	4	0
0.137504	0.237504	0.137504	0.137504	0.137504	0.137504	0.137504	2.32193	1	TGME49_214850	APT	0.645324	0.890879	0.3637	RH	0.170837	0.057735	0.0333333	0.249687	0.324437	APT	ns	1.9174	NoSignificance		0	0	0	0	0	0	0	0	4	1
0.137504	0.237504	0.137504	0.137504	0.137504	0.137504	0.137504	2.32193	1	TGME49_222140	APT	0.645324	0.890879	0.3637	RH	0.170837	0.057735	0.0333333	0.249687	0.324437	APT	ns	1.9174	NoSignificance		0	0	0	0	0	0	0	0	4	1
0.137504	0.237504	0.137504	0.137504	0.137504	0.137504	0.137504	2.32193	1	TGME49_264760	APT	0.645324	0.890879	0.3637	RH	0.170837	0.057735	0.0333333	0.249687	0.324437	APT	ns	1.9174	NoSignificance		0	0	0	0	0	0	0	0	4	1
0.137504	0.237504	0.137504	0.137504	0.137504	0.137504	0.137504	2.32193	1	TGME49_294890	APT	0.645324	0.890879	0.3637	RH	0.170837	0.057735	0.0333333	0.249687	0.324437	APT	ns	1.9174	NoSignificance		0	0	0	0	0	0	0	0	4	1
0.137504	0.237504	0.137504	0.137504	1	0.137504	0.137504	2.32193	0.137504	TGME49_297060	APT	0.645324	0.890879	0.3637	RH	0.170837	0.057735	0.0333333	0.249687	0.324437	APT	ns	1.9174	NoSignificance		0	0	0	0	0	1	0	0	4	0
1	2.1	1.58496	2.80735	2.80735	1	2	2	2	TGME49_312090	APT	2.10245	0.669428	0.273293	RH	1.56165	0.55037	0.317756	0.253744	0.329192	APT	ns	0.428998	NoSignificance		0	1	3	2	6	6	1	3	3	3
2	1.1	0.137504	2	2.32193	1	2	2.58496	1.58496	TGME49_223050	APT	1.91531	0.561256	0.229132	RH	1.07917	0.931423	0.537757	0.255535	0.32972	APT	ns	0.827658	NoSignificance		0	3	1	0	3	4	1	3	5	2
8.96	8.31432	8.56986	8.60733	8.67243	7.83289	8.15482	8.55459	8.02237	TGME49_221320	APT	8.3074	0.350425	0.14306	RH	8.61473	0.325172	0.187738	0.256846	0.32972	RH	ns	-0.0524072	NoSignificance	ACC1	1	497	296	379	389	407	227	284	375	259
0.137504	0.237504	0.137504	0.137504	1	0.137504	0.137504	2.58496	0.137504	TGME49_221522	APT	0.689163	0.990756	0.404474	RH	0.170837	0.057735	0.0333333	0.256935	0.32972	APT	ns	2.01223	NoSignificance		0	0	0	0	0	1	0	0	5	0
0.137504	0.237504	0.137504	0.137504	1	0.137504	0.137504	2.58496	0.137504	TGME49_315270	APT	0.689163	0.990756	0.404474	RH	0.170837	0.057735	0.0333333	0.256935	0.32972	APT	ns	2.01223	NoSignificance		0	0	0	0	0	1	0	0	5	0
0.137504	0.237504	0.137504	0.137504	1	0.137504	0.137504	2.58496	0.137504	TGME49_256830	APT	0.689163	0.990756	0.404474	RH	0.170837	0.057735	0.0333333	0.256935	0.32972	APT	ns	2.01223	NoSignificance		0	0	0	0	0	1	0	0	5	0
0.137504	0.237504	0.137504	0.137504	0.137504	0.137504	0.137504	2.58496	1	TGME49_298990	APT	0.689163	0.990756	0.404474	RH	0.170837	0.057735	0.0333333	0.256935	0.32972	APT	ns	2.01223	NoSignificance	Plant-type ferredoxin- NADP镁-reductase	1	0	0	0	0	0	0	0	5	1
0.137504	0.237504	0.137504	0.137504	0.137504	0.137504	0.137504	2.58496	1	TGME49_261850	APT	0.689163	0.990756	0.404474	RH	0.170837	0.057735	0.0333333	0.256935	0.32972	APT	ns	2.01223	NoSignificance	TgPrex	1	0	0	0	0	0	0	0	5	1
0.137504	1.1	0.137504	1	2.58496	0.137504	0.137504	1	1.58496	TGME49_295110	APT	1.07416	0.928342	0.378994	RH	0.458336	0.555698	0.320832	0.258113	0.33072	APT	ns	1.22873	NoSignificance		1	0	1	0	1	5	0	0	1	2
0.137504	0.237504	0.137504	0.137504	0.137504	0.137504	0.137504	2.80735	1	TGME49_230340	APT	0.726228	1.07633	0.43941	RH	0.170837	0.057735	0.0333333	0.262575	0.335918	APT	ns	2.0878	NoSignificance		0	0	0	0	0	0	0	0	6	1
0.137504	0.237504	0.137504	0.137504	1	0.137504	0.137504	3	0.137504	TGME49_224980	APT	0.758336	1.1511	0.469936	RH	0.170837	0.057735	0.0333333	0.267097	0.340651	APT	ns	2.15022	NoSignificance		0	0	0	0	0	1	0	0	7	0
0.137504	0.237504	0.137504	0.137504	1	0.137504	0.137504	3	0.137504	TGME49_289330	APT	0.758336	1.1511	0.469936	RH	0.170837	0.057735	0.0333333	0.267097	0.340651	APT	ns	2.15022	NoSignificance		0	0	0	0	0	1	0	0	7	0
2	0.237504	1	2.58496	2.32193	0.137504	2	2.32193	1.58496	TGME49_263050	APT	1.82521	0.895244	0.365482	RH	1.07917	0.883911	0.510326	0.298271	0.379826	APT	ns	0.758146	NoSignificance		0	3	0	1	5	4	0	3	4	2
2	0.237504	0.137504	1.58496	1.58496	1	1.58496	2	2	TGME49_243570	APT	1.62581	0.36788	0.150187	RH	0.791669	1.04764	0.604855	0.299898	0.381312	APT	ns	1.03819	NoSignificance		0	3	0	0	2	2	1	2	3	3
3.16993	0.237504	0.137504	3.16993	3.32193	1	2	3.16993	2.58496	TGME49_210690	APT	2.54112	0.902246	0.36834	RH	1.18164	1.72263	0.99456	0.303426	0.385206	APT	ns	1.10467	NoSignificance		0	8	0	0	8	9	1	3	8	5
2	0.237504	1	2.32193	2.58496	0.137504	0.137504	3.70044	2.80735	TGME49_309120	APT	1.94828	1.47722	0.603072	RH	1.07917	0.883911	0.510326	0.310619	0.393736	APT	ns	0.852283	NoSignificance		0	3	0	1	4	5	0	0	12	6
1.58496	0.237504	0.137504	2	1.58496	0.137504	0.137504	2	1.58496	TGME49_233470	APT	1.24082	0.87455	0.357034	RH	0.653323	0.808371	0.466713	0.368949	0.449335	APT	ns	0.925427	NoSignificance		2	2	0	0	3	2	0	0	3	2
1	0.237504	0.137504	2	2	0.137504	0.137504	1	0.137504	TGME49_227600	APT	0.902085	0.913693	0.373014	RH	0.458336	0.471752	0.272366	0.369252	0.449335	APT	ns	0.976859	NoSignificance		0	1	0	0	3	3	0	0	1	0
2	0.237504	0.137504	2	2.32193	0.137504	0.137504	2.58496	2	TGME49_300000	APT	1.53032	1.10091	0.449444	RH	0.791669	1.04764	0.604855	0.37892	0.449335	APT	ns	0.950861	NoSignificance		0	3	0	0	3	4	0	0	5	3
0.137504	0.237504	0.137504	0.137504	0.137504	0.137504	0.137504	3.90689	0.137504	TGME49_292920	APT	0.765735	1.53885	0.628231	RH	0.170837	0.057735	0.0333333	0.387538	0.449335	APT	ns	2.16423	NoSignificance		0	0	0	0	0	0	0	0	14	0
0.137504	0.237504	0.137504	0.137504	0.137504	0.137504	0.137504	3.58496	0.137504	TGME49_215700	APT	0.71208	1.40742	0.574576	RH	0.170837	0.057735	0.0333333	0.389913	0.449335	APT	ns	2.05942	NoSignificance		0	0	0	0	0	0	0	0	11	0
0.137504	0.237504	0.137504	0.137504	0.137504	0.137504	0.137504	3.45943	0.137504	TGME49_214750	APT	0.691158	1.35617	0.553655	RH	0.170837	0.057735	0.0333333	0.39097	0.449335	APT	ns	2.0164	NoSignificance		0	0	0	0	0	0	0	0	10	0
0.137504	0.237504	0.137504	0.137504	0.137504	0.137504	0.137504	3.45943	0.137504	TGME49_314780	APT	0.691158	1.35617	0.553655	RH	0.170837	0.057735	0.0333333	0.39097	0.449335	APT	ns	2.0164	NoSignificance		0	0	0	0	0	0	0	0	10	0
0.137504	0.237504	0.137504	0.137504	0.137504	0.137504	0.137504	3.32193	0.137504	TGME49_268330	APT	0.668241	1.30004	0.530737	RH	0.170837	0.057735	0.0333333	0.392228	0.449335	APT	ns	1.96775	NoSignificance		1	0	0	0	0	0	0	0	9	0
0.137504	0.237504	0.137504	0.137504	0.137504	0.137504	0.137504	3.32193	0.137504	TGME49_268890	APT	0.668241	1.30004	0.530737	RH	0.170837	0.057735	0.0333333	0.392228	0.449335	APT	ns	1.96775	NoSignificance		0	0	0	0	0	0	0	0	9	0
0.137504	0.237504	0.137504	0.137504	0.137504	0.137504	0.137504	3.16993	0.137504	TGME49_202680	APT	0.642907	1.23798	0.505404	RH	0.170837	0.057735	0.0333333	0.393758	0.449335	APT	ns	1.91199	NoSignificance		0	0	0	0	0	0	0	0	8	0
0.137504	0.237504	0.137504	0.137504	0.137504	0.137504	0.137504	3.16993	0.137504	TGME49_267330	APT	0.642907	1.23798	0.505404	RH	0.170837	0.057735	0.0333333	0.393758	0.449335	APT	ns	1.91199	NoSignificance		0	0	0	0	0	0	0	0	8	0
0.137504	0.237504	0.137504	0.137504	0.137504	0.137504	0.137504	3.16993	0.137504	TGME49_249630	APT	0.642907	1.23798	0.505404	RH	0.170837	0.057735	0.0333333	0.393758	0.449335	APT	ns	1.91199	NoSignificance		0	0	0	0	0	0	0	0	8	0
0.137504	0.237504	0.137504	0.137504	0.137504	0.137504	0.137504	3	0.137504	TGME49_227610	APT	0.614586	1.16861	0.477083	RH	0.170837	0.057735	0.0333333	0.395672	0.449335	APT	ns	1.847	NoSignificance		0	0	0	0	0	0	0	0	7	0
0.137504	0.237504	0.137504	0.137504	0.137504	0.137504	0.137504	3	0.137504	TGME49_295000	APT	0.614586	1.16861	0.477083	RH	0.170837	0.057735	0.0333333	0.395672	0.449335	APT	ns	1.847	NoSignificance		0	0	0	0	0	0	0	0	7	0
0.137504	0.237504	0.137504	0.137504	0.137504	0.137504	0.137504	0.137504	3	TGME49_223940	APT	0.614586	1.16861	0.477083	RH	0.170837	0.057735	0.0333333	0.395672	0.449335	APT	ns	1.847	NoSignificance		0	0	0	0	0	0	0	0	0	7
0.137504	0.237504	0.137504	0.137504	0.137504	0.137504	0.137504	2.80735	0.137504	TGME49_234420	APT	0.582479	1.08996	0.444975	RH	0.170837	0.057735	0.0333333	0.398152	0.449335	APT	ns	1.76959	NoSignificance		0	0	0	0	0	0	0	0	6	0
0.137504	0.237504	0.137504	0.137504	0.137504	0.137504	0.137504	2.80735	0.137504	TGME49_301120	APT	0.582479	1.08996	0.444975	RH	0.170837	0.057735	0.0333333	0.398152	0.449335	APT	ns	1.76959	NoSignificance		0	0	0	0	0	0	0	0	6	0
0.137504	0.237504	0.137504	0.137504	0.137504	0.137504	0.137504	2.58496	0.137504	TGME49_238400	APT	0.545413	0.999171	0.40791	RH	0.170837	0.057735	0.0333333	0.401531	0.449335	APT	ns	1.67473	NoSignificance		0	0	0	0	0	0	0	0	5	0
0.137504	0.237504	0.137504	0.137504	0.137504	0.137504	0.137504	2.58496	0.137504	TGME49_304630	APT	0.545413	0.999171	0.40791	RH	0.170837	0.057735	0.0333333	0.401531	0.449335	APT	ns	1.67473	NoSignificance		0	0	0	0	0	0	0	0	5	0
0.137504	0.237504	0.137504	0.137504	0.137504	0.137504	0.137504	2.58496	0.137504	TGME49_269180	APT	0.545413	0.999171	0.40791	RH	0.170837	0.057735	0.0333333	0.401531	0.449335	APT	ns	1.67473	NoSignificance		0	0	0	0	0	0	0	0	5	0
0.137504	0.237504	0.137504	0.137504	0.137504	0.137504	0.137504	2.58496	0.137504	TGME49_214120	APT	0.545413	0.999171	0.40791	RH	0.170837	0.057735	0.0333333	0.401531	0.449335	APT	ns	1.67473	NoSignificance		0	0	0	0	0	0	0	0	5	0
0.137504	0.237504	0.137504	0.137504	0.137504	0.137504	0.137504	2.58496	0.137504	TGME49_223970	APT	0.545413	0.999171	0.40791	RH	0.170837	0.057735	0.0333333	0.401531	0.449335	APT	ns	1.67473	NoSignificance		0	0	0	0	0	0	0	0	5	0
0.137504	0.237504	0.137504	0.137504	0.137504	0.137504	0.137504	2.58496	0.137504	TGME49_227948	APT	0.545413	0.999171	0.40791	RH	0.170837	0.057735	0.0333333	0.401531	0.449335	APT	ns	1.67473	NoSignificance		0	0	0	0	0	0	0	0	5	0
0.137504	0.237504	0.137504	0.137504	0.137504	0.137504	0.137504	2.58496	0.137504	TGME49_314390	APT	0.545413	0.999171	0.40791	RH	0.170837	0.057735	0.0333333	0.401531	0.449335	APT	ns	1.67473	NoSignificance		0	0	0	0	0	0	0	0	5	0
0.137504	0.237504	0.137504	0.137504	0.137504	0.137504	0.137504	2.58496	0.137504	TGME49_247600	APT	0.545413	0.999171	0.40791	RH	0.170837	0.057735	0.0333333	0.401531	0.449335	APT	ns	1.67473	NoSignificance		0	0	0	0	0	0	0	0	5	0
0.137504	0.237504	0.137504	0.137504	0.137504	0.137504	0.137504	2.58496	0.137504	TGME49_313270	APT	0.545413	0.999171	0.40791	RH	0.170837	0.057735	0.0333333	0.401531	0.449335	APT	ns	1.67473	NoSignificance		0	0	0	0	0	0	0	0	5	0
0.137504	0.237504	0.137504	0.137504	0.137504	0.137504	0.137504	2.58496	0.137504	TGME49_224090	APT	0.545413	0.999171	0.40791	RH	0.170837	0.057735	0.0333333	0.401531	0.449335	APT	ns	1.67473	NoSignificance		0	0	0	0	0	0	0	0	5	0
0.137504	0.237504	0.137504	0.137504	0.137504	0.137504	0.137504	2.58496	0.137504	TGME49_313240	APT	0.545413	0.999171	0.40791	RH	0.170837	0.057735	0.0333333	0.401531	0.449335	APT	ns	1.67473	NoSignificance		0	0	0	0	0	0	0	0	5	0
0.137504	0.237504	0.137504	0.137504	0.137504	0.137504	0.137504	2.58496	0.137504	TGME49_226730	APT	0.545413	0.999171	0.40791	RH	0.170837	0.057735	0.0333333	0.401531	0.449335	APT	ns	1.67473	NoSignificance		0	0	0	0	0	0	0	0	5	0
0.137504	0.237504	0.137504	0.137504	0.137504	0.137504	0.137504	2.58496	0.137504	TGME49_216000	APT	0.545413	0.999171	0.40791	RH	0.170837	0.057735	0.0333333	0.401531	0.449335	APT	ns	1.67473	NoSignificance		0	0	0	0	0	0	0	0	5	0
3	0.237504	0.137504	0.137504	0.137504	0.137504	0.137504	0.137504	0.137504	TGME49_289760	APT	0.137504	0	0	RH	1.125	1.62457	0.937943	0.402845	0.449335	RH	ns	-3.03239	NoSignificance		0	7	0	0	0	0	0	0	0	0
0.137504	0.237504	0.137504	0.137504	0.137504	0.137504	0.137504	2.32193	0.137504	TGME49_258540	APT	0.501574	0.891788	0.364071	RH	0.170837	0.057735	0.0333333	0.406477	0.449335	APT	ns	1.55384	NoSignificance		0	0	0	0	0	0	0	0	4	0
0.137504	0.237504	0.137504	0.137504	0.137504	0.137504	0.137504	2.32193	0.137504	TGME49_264430	APT	0.501574	0.891788	0.364071	RH	0.170837	0.057735	0.0333333	0.406477	0.449335	APT	ns	1.55384	NoSignificance		0	0	0	0	0	0	0	0	4	0
0.137504	0.237504	0.137504	0.137504	0.137504	0.137504	0.137504	2.32193	0.137504	TGME49_234280	APT	0.501574	0.891788	0.364071	RH	0.170837	0.057735	0.0333333	0.406477	0.449335	APT	ns	1.55384	NoSignificance		0	0	0	0	0	0	0	0	4	0
0.137504	0.237504	0.137504	0.137504	0.137504	0.137504	0.137504	2.32193	0.137504	TGME49_289570	APT	0.501574	0.891788	0.364071	RH	0.170837	0.057735	0.0333333	0.406477	0.449335	APT	ns	1.55384	NoSignificance		4	0	0	0	0	0	0	0	4	0
0.137504	0.237504	0.137504	0.137504	0.137504	0.137504	0.137504	2.32193	0.137504	TGME49_286230	APT	0.501574	0.891788	0.364071	RH	0.170837	0.057735	0.0333333	0.406477	0.449335	APT	ns	1.55384	NoSignificance		0	0	0	0	0	0	0	0	4	0
0.137504	0.237504	0.137504	0.137504	0.137504	0.137504	0.137504	2.32193	0.137504	TGME49_312140	APT	0.501574	0.891788	0.364071	RH	0.170837	0.057735	0.0333333	0.406477	0.449335	APT	ns	1.55384	NoSignificance		0	0	0	0	0	0	0	0	4	0
0.137504	0.237504	0.137504	0.137504	0.137504	0.137504	0.137504	2.32193	0.137504	TGME49_320000	APT	0.501574	0.891788	0.364071	RH	0.170837	0.057735	0.0333333	0.406477	0.449335	APT	ns	1.55384	NoSignificance		0	0	0	0	0	0	0	0	4	0
0.137504	0.237504	0.137504	0.137504	0.137504	0.137504	0.137504	2.32193	0.137504	TGME49_216260	APT	0.501574	0.891788	0.364071	RH	0.170837	0.057735	0.0333333	0.406477	0.449335	APT	ns	1.55384	NoSignificance		0	0	0	0	0	0	0	0	4	0
0.137504	0.237504	0.137504	0.137504	0.137504	0.137504	0.137504	2.32193	0.137504	TGME49_202630	APT	0.501574	0.891788	0.364071	RH	0.170837	0.057735	0.0333333	0.406477	0.449335	APT	ns	1.55384	NoSignificance		2	0	0	0	0	0	0	0	4	0
0.137504	0.237504	0.137504	0.137504	0.137504	0.137504	0.137504	2.32193	0.137504	TGME49_237010	APT	0.501574	0.891788	0.364071	RH	0.170837	0.057735	0.0333333	0.406477	0.449335	APT	ns	1.55384	NoSignificance		0	0	0	0	0	0	0	0	4	0
0.137504	0.237504	0.137504	0.137504	0.137504	0.137504	0.137504	2.32193	0.137504	TGME49_237870	APT	0.501574	0.891788	0.364071	RH	0.170837	0.057735	0.0333333	0.406477	0.449335	APT	ns	1.55384	NoSignificance		0	0	0	0	0	0	0	0	4	0
0.137504	0.237504	0.137504	0.137504	0.137504	0.137504	0.137504	2.32193	0.137504	TGME49_249180	APT	0.501574	0.891788	0.364071	RH	0.170837	0.057735	0.0333333	0.406477	0.449335	APT	ns	1.55384	NoSignificance		0	0	0	0	0	0	0	0	4	0
0.137504	0.237504	0.137504	0.137504	0.137504	0.137504	0.137504	2.32193	0.137504	TGME49_260170	APT	0.501574	0.891788	0.364071	RH	0.170837	0.057735	0.0333333	0.406477	0.449335	APT	ns	1.55384	NoSignificance		0	0	0	0	0	0	0	0	4	0
0.137504	0.237504	0.137504	0.137504	0.137504	0.137504	0.137504	2.32193	0.137504	TGME49_280560	APT	0.501574	0.891788	0.364071	RH	0.170837	0.057735	0.0333333	0.406477	0.449335	APT	ns	1.55384	NoSignificance		0	0	0	0	0	0	0	0	4	0
0.137504	0.237504	0.137504	0.137504	0.137504	0.137504	0.137504	2.32193	0.137504	TGME49_285700	APT	0.501574	0.891788	0.364071	RH	0.170837	0.057735	0.0333333	0.406477	0.449335	APT	ns	1.55384	NoSignificance		0	0	0	0	0	0	0	0	4	0
0.137504	0.237504	0.137504	0.137504	0.137504	0.137504	0.137504	2.32193	0.137504	TGME49_304470	APT	0.501574	0.891788	0.364071	RH	0.170837	0.057735	0.0333333	0.406477	0.449335	APT	ns	1.55384	NoSignificance		2	0	0	0	0	0	0	0	4	0
0.137504	0.237504	0.137504	0.137504	0.137504	0.137504	0.137504	2.32193	0.137504	TGME49_283830	APT	0.501574	0.891788	0.364071	RH	0.170837	0.057735	0.0333333	0.406477	0.449335	APT	ns	1.55384	NoSignificance		0	0	0	0	0	0	0	0	4	0
0.137504	0.237504	0.137504	0.137504	0.137504	0.137504	0.137504	2.32193	0.137504	TGME49_272695	APT	0.501574	0.891788	0.364071	RH	0.170837	0.057735	0.0333333	0.406477	0.449335	APT	ns	1.55384	NoSignificance		1	0	0	0	0	0	0	0	4	0
0.137504	0.237504	0.137504	0.137504	0.137504	0.137504	0.137504	2.32193	0.137504	TGME49_211710	APT	0.501574	0.891788	0.364071	RH	0.170837	0.057735	0.0333333	0.406477	0.449335	APT	ns	1.55384	NoSignificance		3	0	0	0	0	0	0	0	4	0
0.137504	0.237504	0.137504	0.137504	0.137504	0.137504	0.137504	2	0.137504	TGME49_207620	APT	0.44792	0.760361	0.310416	RH	0.170837	0.057735	0.0333333	0.414586	0.449335	APT	ns	1.39062	NoSignificance		0	0	0	0	0	0	0	0	3	0
0.137504	0.237504	0.137504	0.137504	0.137504	0.137504	0.137504	2	0.137504	TGME49_312480	APT	0.44792	0.760361	0.310416	RH	0.170837	0.057735	0.0333333	0.414586	0.449335	APT	ns	1.39062	NoSignificance		0	0	0	0	0	0	0	0	3	0
0.137504	0.237504	0.137504	0.137504	0.137504	0.137504	0.137504	2	0.137504	TGME49_271470	APT	0.44792	0.760361	0.310416	RH	0.170837	0.057735	0.0333333	0.414586	0.449335	APT	ns	1.39062	NoSignificance		0	0	0	0	0	0	0	0	3	0
0.137504	0.237504	0.137504	0.137504	0.137504	0.137504	0.137504	2	0.137504	TGME49_290950	APT	0.44792	0.760361	0.310416	RH	0.170837	0.057735	0.0333333	0.414586	0.449335	APT	ns	1.39062	NoSignificance		0	0	0	0	0	0	0	0	3	0
0.137504	0.237504	0.137504	0.137504	0.137504	0.137504	0.137504	2	0.137504	TGME49_230860	APT	0.44792	0.760361	0.310416	RH	0.170837	0.057735	0.0333333	0.414586	0.449335	APT	ns	1.39062	NoSignificance		0	0	0	0	0	0	0	0	3	0
0.137504	0.237504	0.137504	0.137504	0.137504	0.137504	0.137504	2	0.137504	TGME49_290600	APT	0.44792	0.760361	0.310416	RH	0.170837	0.057735	0.0333333	0.414586	0.449335	APT	ns	1.39062	NoSignificance		0	0	0	0	0	0	0	0	3	0
0.137504	0.237504	0.137504	0.137504	0.137504	0.137504	0.137504	2	0.137504	TGME49_207370	APT	0.44792	0.760361	0.310416	RH	0.170837	0.057735	0.0333333	0.414586	0.449335	APT	ns	1.39062	NoSignificance		0	0	0	0	0	0	0	0	3	0
0.137504	0.237504	0.137504	0.137504	0.137504	0.137504	0.137504	2	0.137504	TGME49_247290	APT	0.44792	0.760361	0.310416	RH	0.170837	0.057735	0.0333333	0.414586	0.449335	APT	ns	1.39062	NoSignificance		2	0	0	0	0	0	0	0	3	0
0.137504	0.237504	0.137504	0.137504	0.137504	0.137504	0.137504	2	0.137504	TGME49_240830	APT	0.44792	0.760361	0.310416	RH	0.170837	0.057735	0.0333333	0.414586	0.449335	APT	ns	1.39062	NoSignificance		1	0	0	0	0	0	0	0	3	0
0.137504	0.237504	0.137504	0.137504	0.137504	0.137504	0.137504	2	0.137504	TGME49_290200	APT	0.44792	0.760361	0.310416	RH	0.170837	0.057735	0.0333333	0.414586	0.449335	APT	ns	1.39062	NoSignificance		0	0	0	0	0	0	0	0	3	0
0.137504	0.237504	0.137504	0.137504	0.137504	0.137504	0.137504	2	0.137504	TGME49_297330	APT	0.44792	0.760361	0.310416	RH	0.170837	0.057735	0.0333333	0.414586	0.449335	APT	ns	1.39062	NoSignificance		3	0	0	0	0	0	0	0	3	0
0.137504	0.237504	0.137504	0.137504	0.137504	0.137504	0.137504	2	0.137504	TGME49_252290	APT	0.44792	0.760361	0.310416	RH	0.170837	0.057735	0.0333333	0.414586	0.449335	APT	ns	1.39062	NoSignificance		0	0	0	0	0	0	0	0	3	0
0.137504	0.237504	0.137504	0.137504	0.137504	0.137504	0.137504	2	0.137504	TGME49_308580	APT	0.44792	0.760361	0.310416	RH	0.170837	0.057735	0.0333333	0.414586	0.449335	APT	ns	1.39062	NoSignificance		0	0	0	0	0	0	0	0	3	0
0.137504	0.237504	0.137504	0.137504	0.137504	0.137504	0.137504	2	0.137504	TGME49_291950	APT	0.44792	0.760361	0.310416	RH	0.170837	0.057735	0.0333333	0.414586	0.449335	APT	ns	1.39062	NoSignificance		0	0	0	0	0	0	0	0	3	0
0.137504	0.237504	0.137504	0.137504	0.137504	0.137504	0.137504	2	0.137504	TGME49_286510	APT	0.44792	0.760361	0.310416	RH	0.170837	0.057735	0.0333333	0.414586	0.449335	APT	ns	1.39062	NoSignificance		5	0	0	0	0	0	0	0	3	0
0.137504	0.237504	0.137504	0.137504	0.137504	0.137504	0.137504	2	0.137504	TGME49_315080	APT	0.44792	0.760361	0.310416	RH	0.170837	0.057735	0.0333333	0.414586	0.449335	APT	ns	1.39062	NoSignificance		0	0	0	0	0	0	0	0	3	0
0.137504	0.237504	0.137504	0.137504	0.137504	0.137504	0.137504	2	0.137504	TGME49_248700	APT	0.44792	0.760361	0.310416	RH	0.170837	0.057735	0.0333333	0.414586	0.449335	APT	ns	1.39062	NoSignificance		0	0	0	0	0	0	0	0	3	0
0.137504	0.237504	0.137504	0.137504	0.137504	0.137504	0.137504	2	0.137504	TGME49_235970	APT	0.44792	0.760361	0.310416	RH	0.170837	0.057735	0.0333333	0.414586	0.449335	APT	ns	1.39062	NoSignificance		0	0	0	0	0	0	0	0	3	0
0.137504	0.237504	0.137504	0.137504	0.137504	0.137504	0.137504	2	0.137504	TGME49_266990	APT	0.44792	0.760361	0.310416	RH	0.170837	0.057735	0.0333333	0.414586	0.449335	APT	ns	1.39062	NoSignificance		0	0	0	0	0	0	0	0	3	0
0.137504	0.237504	0.137504	0.137504	0.137504	0.137504	0.137504	2	0.137504	TGME49_262450	APT	0.44792	0.760361	0.310416	RH	0.170837	0.057735	0.0333333	0.414586	0.449335	APT	ns	1.39062	NoSignificance		0	0	0	0	0	0	0	0	3	0
0.137504	0.237504	0.137504	0.137504	0.137504	0.137504	0.137504	2	0.137504	TGME49_242010	APT	0.44792	0.760361	0.310416	RH	0.170837	0.057735	0.0333333	0.414586	0.449335	APT	ns	1.39062	NoSignificance		0	0	0	0	0	0	0	0	3	0
0.137504	0.237504	0.137504	0.137504	0.137504	0.137504	0.137504	2	0.137504	TGME49_222860	APT	0.44792	0.760361	0.310416	RH	0.170837	0.057735	0.0333333	0.414586	0.449335	APT	ns	1.39062	NoSignificance		0	0	0	0	0	0	0	0	3	0
0.137504	0.237504	0.137504	0.137504	0.137504	0.137504	0.137504	2	0.137504	TGME49_230520	APT	0.44792	0.760361	0.310416	RH	0.170837	0.057735	0.0333333	0.414586	0.449335	APT	ns	1.39062	NoSignificance		0	0	0	0	0	0	0	0	3	0
0.137504	0.237504	0.137504	0.137504	0.137504	0.137504	0.137504	2	0.137504	TGME49_220230	APT	0.44792	0.760361	0.310416	RH	0.170837	0.057735	0.0333333	0.414586	0.449335	APT	ns	1.39062	NoSignificance		0	0	0	0	0	0	0	0	3	0
0.137504	0.237504	0.137504	0.137504	2	0.137504	0.137504	0.137504	0.137504	TGME49_202070	APT	0.44792	0.760361	0.310416	RH	0.170837	0.057735	0.0333333	0.414586	0.449335	APT	ns	1.39062	NoSignificance		0	0	0	0	0	3	0	0	0	0
6.49185	2.90735	1.58496	5.12928	5.32193	4.58496	4.80735	5.72792	5.35755	TGME49_218560	APT	5.15483	0.410753	0.167689	RH	3.66139	2.53886	1.46581	0.415625	0.449335	APT	ns	0.493534	NoSignificance		0	89	6	2	34	39	23	27	52	40
1	0.237504	0.137504	1.58496	0.137504	0.137504	1	2	0.137504	TGME49_243950	APT	0.832912	0.825393	0.336965	RH	0.458336	0.471752	0.272366	0.41756	0.449335	APT	ns	0.86176	NoSignificance		0	1	0	0	2	0	0	1	3	0
0.137504	0.237504	0.137504	0.137504	0.137504	0.137504	0.137504	0.137504	0.137504	TGME49_293250	APT	0.137504	0	0	RH	0.170837	0.057735	0.0333333	0.42265	0.449335	RH	ns	-0.313151	NoSignificance		0	0	0	0	0	0	0	0	0	0
3.45943	0.237504	0.137504	2.32193	2.58496	1	2	3.16993	3.16993	TGME49_204020	APT	2.37446	0.817553	0.333764	RH	1.27815	1.88971	1.09102	0.42367	0.449335	APT	ns	0.893545	NoSignificance		0	10	0	0	4	5	1	3	8	8
1	1.1	0.137504	0.137504	1	1	0.137504	0.137504	0.137504	TGME49_300200	APT	0.425002	0.445391	0.18183	RH	0.745835	0.529197	0.305532	0.424734	0.449335	RH	ns	-0.811385	NoSignificance		0	1	1	0	0	1	1	0	0	0
0.137504	0.237504	0.137504	1.58496	0.137504	0.137504	0.137504	0.137504	0.137504	TGME49_221480	APT	0.378747	0.590923	0.241243	RH	0.170837	0.057735	0.0333333	0.430906	0.449335	APT	ns	1.14861	NoSignificance		2	0	0	0	2	0	0	0	0	0
0.137504	0.237504	0.137504	0.137504	0.137504	0.137504	0.137504	1.58496	0.137504	TGME49_212290	APT	0.378747	0.590923	0.241243	RH	0.170837	0.057735	0.0333333	0.430906	0.449335	APT	ns	1.14861	NoSignificance		0	0	0	0	0	0	0	0	2	0
0.137504	0.237504	0.137504	0.137504	0.137504	0.137504	0.137504	1.58496	0.137504	TGME49_304955	APT	0.378747	0.590923	0.241243	RH	0.170837	0.057735	0.0333333	0.430906	0.449335	APT	ns	1.14861	NoSignificance		3	0	0	0	0	0	0	0	2	0
0.137504	0.237504	0.137504	0.137504	0.137504	0.137504	0.137504	1.58496	0.137504	TGME49_263690	APT	0.378747	0.590923	0.241243	RH	0.170837	0.057735	0.0333333	0.430906	0.449335	APT	ns	1.14861	NoSignificance	Negtive	10	0	0	0	0	0	0	0	2	0
0.137504	0.237504	0.137504	0.137504	0.137504	0.137504	0.137504	1.58496	0.137504	TGME49_304670	APT	0.378747	0.590923	0.241243	RH	0.170837	0.057735	0.0333333	0.430906	0.449335	APT	ns	1.14861	NoSignificance		0	0	0	0	0	0	0	0	2	0
0.137504	0.237504	0.137504	0.137504	0.137504	0.137504	0.137504	1.58496	0.137504	TGME49_201380	APT	0.378747	0.590923	0.241243	RH	0.170837	0.057735	0.0333333	0.430906	0.449335	APT	ns	1.14861	NoSignificance		0	0	0	0	0	0	0	0	2	0
0.137504	0.237504	0.137504	0.137504	0.137504	0.137504	0.137504	1.58496	0.137504	TGME49_313580	APT	0.378747	0.590923	0.241243	RH	0.170837	0.057735	0.0333333	0.430906	0.449335	APT	ns	1.14861	NoSignificance		0	0	0	0	0	0	0	0	2	0
0.137504	0.237504	0.137504	0.137504	0.137504	0.137504	0.137504	1.58496	0.137504	TGME49_205150	APT	0.378747	0.590923	0.241243	RH	0.170837	0.057735	0.0333333	0.430906	0.449335	APT	ns	1.14861	NoSignificance		1	0	0	0	0	0	0	0	2	0
0.137504	0.237504	0.137504	0.137504	0.137504	0.137504	0.137504	1.58496	0.137504	TGME49_320670	APT	0.378747	0.590923	0.241243	RH	0.170837	0.057735	0.0333333	0.430906	0.449335	APT	ns	1.14861	NoSignificance		0	0	0	0	0	0	0	0	2	0
0.137504	0.237504	0.137504	0.137504	0.137504	0.137504	0.137504	1.58496	0.137504	TGME49_255250	APT	0.378747	0.590923	0.241243	RH	0.170837	0.057735	0.0333333	0.430906	0.449335	APT	ns	1.14861	NoSignificance		0	0	0	0	0	0	0	0	2	0
0.137504	0.237504	0.137504	0.137504	0.137504	0.137504	0.137504	1.58496	0.137504	TGME49_264940	APT	0.378747	0.590923	0.241243	RH	0.170837	0.057735	0.0333333	0.430906	0.449335	APT	ns	1.14861	NoSignificance		0	0	0	0	0	0	0	0	2	0
0.137504	0.237504	0.137504	0.137504	0.137504	0.137504	0.137504	1.58496	0.137504	TGME49_273920	APT	0.378747	0.590923	0.241243	RH	0.170837	0.057735	0.0333333	0.430906	0.449335	APT	ns	1.14861	NoSignificance		0	0	0	0	0	0	0	0	2	0
0.137504	0.237504	0.137504	0.137504	0.137504	0.137504	0.137504	1.58496	0.137504	TGME49_231070	APT	0.378747	0.590923	0.241243	RH	0.170837	0.057735	0.0333333	0.430906	0.449335	APT	ns	1.14861	NoSignificance		0	0	0	0	0	0	0	0	2	0
0.137504	0.237504	0.137504	0.137504	0.137504	0.137504	0.137504	1.58496	0.137504	TGME49_316330	APT	0.378747	0.590923	0.241243	RH	0.170837	0.057735	0.0333333	0.430906	0.449335	APT	ns	1.14861	NoSignificance		0	0	0	0	0	0	0	0	2	0
0.137504	0.237504	0.137504	0.137504	0.137504	0.137504	0.137504	1.58496	0.137504	TGME49_238140	APT	0.378747	0.590923	0.241243	RH	0.170837	0.057735	0.0333333	0.430906	0.449335	APT	ns	1.14861	NoSignificance		0	0	0	0	0	0	0	0	2	0
0.137504	0.237504	0.137504	0.137504	0.137504	0.137504	0.137504	1.58496	0.137504	TGME49_238190	APT	0.378747	0.590923	0.241243	RH	0.170837	0.057735	0.0333333	0.430906	0.449335	APT	ns	1.14861	NoSignificance		0	0	0	0	0	0	0	0	2	0
0.137504	0.237504	0.137504	0.137504	0.137504	0.137504	0.137504	1.58496	0.137504	TGME49_240220	APT	0.378747	0.590923	0.241243	RH	0.170837	0.057735	0.0333333	0.430906	0.449335	APT	ns	1.14861	NoSignificance		0	0	0	0	0	0	0	0	2	0
0.137504	0.237504	0.137504	0.137504	0.137504	0.137504	0.137504	1.58496	0.137504	TGME49_257040	APT	0.378747	0.590923	0.241243	RH	0.170837	0.057735	0.0333333	0.430906	0.449335	APT	ns	1.14861	NoSignificance		2	0	0	0	0	0	0	0	2	0
0.137504	0.237504	0.137504	0.137504	0.137504	0.137504	0.137504	1.58496	0.137504	TGME49_260600	APT	0.378747	0.590923	0.241243	RH	0.170837	0.057735	0.0333333	0.430906	0.449335	APT	ns	1.14861	NoSignificance		0	0	0	0	0	0	0	0	2	0
0.137504	0.237504	0.137504	0.137504	0.137504	0.137504	0.137504	1.58496	0.137504	TGME49_239752	APT	0.378747	0.590923	0.241243	RH	0.170837	0.057735	0.0333333	0.430906	0.449335	APT	ns	1.14861	NoSignificance		0	0	0	0	0	0	0	0	2	0
0.137504	0.237504	0.137504	0.137504	0.137504	0.137504	0.137504	1.58496	0.137504	TGME49_271050	APT	0.378747	0.590923	0.241243	RH	0.170837	0.057735	0.0333333	0.430906	0.449335	APT	ns	1.14861	NoSignificance		0	0	0	0	0	0	0	0	2	0
0.137504	0.237504	0.137504	0.137504	0.137504	0.137504	0.137504	1.58496	0.137504	TGME49_213050	APT	0.378747	0.590923	0.241243	RH	0.170837	0.057735	0.0333333	0.430906	0.449335	APT	ns	1.14861	NoSignificance		0	0	0	0	0	0	0	0	2	0
0.137504	0.237504	0.137504	0.137504	0.137504	0.137504	0.137504	1.58496	0.137504	TGME49_305610	APT	0.378747	0.590923	0.241243	RH	0.170837	0.057735	0.0333333	0.430906	0.449335	APT	ns	1.14861	NoSignificance		0	0	0	0	0	0	0	0	2	0
0.137504	0.237504	0.137504	0.137504	0.137504	0.137504	0.137504	1.58496	0.137504	TGME49_259550	APT	0.378747	0.590923	0.241243	RH	0.170837	0.057735	0.0333333	0.430906	0.449335	APT	ns	1.14861	NoSignificance		0	0	0	0	0	0	0	0	2	0
0.137504	0.237504	0.137504	0.137504	0.137504	0.137504	0.137504	1.58496	0.137504	TGME49_221360	APT	0.378747	0.590923	0.241243	RH	0.170837	0.057735	0.0333333	0.430906	0.449335	APT	ns	1.14861	NoSignificance		0	0	0	0	0	0	0	0	2	0
0.137504	0.237504	0.137504	0.137504	0.137504	0.137504	0.137504	1.58496	0.137504	TGME49_212260	APT	0.378747	0.590923	0.241243	RH	0.170837	0.057735	0.0333333	0.430906	0.449335	APT	ns	1.14861	NoSignificance		0	0	0	0	0	0	0	0	2	0
0.137504	0.237504	0.137504	0.137504	0.137504	0.137504	0.137504	1.58496	0.137504	TGME49_262730	APT	0.378747	0.590923	0.241243	RH	0.170837	0.057735	0.0333333	0.430906	0.449335	APT	ns	1.14861	NoSignificance		0	0	0	0	0	0	0	0	2	0
0.137504	0.237504	0.137504	0.137504	0.137504	0.137504	0.137504	1.58496	0.137504	TGME49_320220	APT	0.378747	0.590923	0.241243	RH	0.170837	0.057735	0.0333333	0.430906	0.449335	APT	ns	1.14861	NoSignificance		0	0	0	0	0	0	0	0	2	0
0.137504	0.237504	0.137504	0.137504	0.137504	0.137504	0.137504	1.58496	0.137504	TGME49_219682	APT	0.378747	0.590923	0.241243	RH	0.170837	0.057735	0.0333333	0.430906	0.449335	APT	ns	1.14861	NoSignificance		0	0	0	0	0	0	0	0	2	0
0.137504	0.237504	0.137504	0.137504	0.137504	0.137504	0.137504	1.58496	0.137504	TGME49_286620	APT	0.378747	0.590923	0.241243	RH	0.170837	0.057735	0.0333333	0.430906	0.449335	APT	ns	1.14861	NoSignificance		1	0	0	0	0	0	0	0	2	0
0.137504	0.237504	0.137504	0.137504	0.137504	0.137504	0.137504	1.58496	0.137504	TGME49_234450	APT	0.378747	0.590923	0.241243	RH	0.170837	0.057735	0.0333333	0.430906	0.449335	APT	ns	1.14861	NoSignificance		1	0	0	0	0	0	0	0	2	0
0.137504	0.237504	0.137504	0.137504	0.137504	0.137504	0.137504	1.58496	0.137504	TGME49_224600	APT	0.378747	0.590923	0.241243	RH	0.170837	0.057735	0.0333333	0.430906	0.449335	APT	ns	1.14861	NoSignificance		0	0	0	0	0	0	0	0	2	0
0.137504	0.237504	0.137504	0.137504	0.137504	0.137504	0.137504	1.58496	0.137504	TGME49_297720	APT	0.378747	0.590923	0.241243	RH	0.170837	0.057735	0.0333333	0.430906	0.449335	APT	ns	1.14861	NoSignificance		0	0	0	0	0	0	0	0	2	0
0.137504	0.237504	0.137504	0.137504	0.137504	0.137504	0.137504	1.58496	0.137504	TGME49_278470	APT	0.378747	0.590923	0.241243	RH	0.170837	0.057735	0.0333333	0.430906	0.449335	APT	ns	1.14861	NoSignificance		0	0	0	0	0	0	0	0	2	0
0.137504	0.237504	0.137504	0.137504	0.137504	0.137504	0.137504	1.58496	0.137504	TGME49_220090	APT	0.378747	0.590923	0.241243	RH	0.170837	0.057735	0.0333333	0.430906	0.449335	APT	ns	1.14861	NoSignificance		0	0	0	0	0	0	0	0	2	0
0.137504	0.237504	0.137504	0.137504	0.137504	0.137504	0.137504	1.58496	0.137504	TGME49_230160	APT	0.378747	0.590923	0.241243	RH	0.170837	0.057735	0.0333333	0.430906	0.449335	APT	ns	1.14861	NoSignificance		0	0	0	0	0	0	0	0	2	0
0.137504	0.237504	0.137504	0.137504	0.137504	0.137504	0.137504	1.58496	0.137504	TGME49_315310	APT	0.378747	0.590923	0.241243	RH	0.170837	0.057735	0.0333333	0.430906	0.449335	APT	ns	1.14861	NoSignificance		0	0	0	0	0	0	0	0	2	0
0.137504	0.237504	0.137504	0.137504	0.137504	0.137504	0.137504	1.58496	0.137504	TGME49_217590	APT	0.378747	0.590923	0.241243	RH	0.170837	0.057735	0.0333333	0.430906	0.449335	APT	ns	1.14861	NoSignificance		0	0	0	0	0	0	0	0	2	0
0.137504	0.237504	0.137504	0.137504	0.137504	0.137504	0.137504	1.58496	0.137504	TGME49_310770	APT	0.378747	0.590923	0.241243	RH	0.170837	0.057735	0.0333333	0.430906	0.449335	APT	ns	1.14861	NoSignificance	TgAtrx2	1	0	0	0	0	0	0	0	2	0
0.137504	0.237504	0.137504	0.137504	0.137504	0.137504	0.137504	1.58496	0.137504	TGME49_232080	APT	0.378747	0.590923	0.241243	RH	0.170837	0.057735	0.0333333	0.430906	0.449335	APT	ns	1.14861	NoSignificance		2	0	0	0	0	0	0	0	2	0
0.137504	0.237504	0.137504	0.137504	0.137504	0.137504	0.137504	1.58496	0.137504	TGME49_306650	APT	0.378747	0.590923	0.241243	RH	0.170837	0.057735	0.0333333	0.430906	0.449335	APT	ns	1.14861	NoSignificance		0	0	0	0	0	0	0	0	2	0
0.137504	0.237504	0.137504	0.137504	0.137504	0.137504	0.137504	1.58496	0.137504	TGME49_321410	APT	0.378747	0.590923	0.241243	RH	0.170837	0.057735	0.0333333	0.430906	0.449335	APT	ns	1.14861	NoSignificance		1	0	0	0	0	0	0	0	2	0
0.137504	0.237504	0.137504	0.137504	0.137504	0.137504	0.137504	1.58496	0.137504	TGME49_267280	APT	0.378747	0.590923	0.241243	RH	0.170837	0.057735	0.0333333	0.430906	0.449335	APT	ns	1.14861	NoSignificance		0	0	0	0	0	0	0	0	2	0
0.137504	0.237504	0.137504	0.137504	0.137504	0.137504	0.137504	1.58496	0.137504	TGME49_209100	APT	0.378747	0.590923	0.241243	RH	0.170837	0.057735	0.0333333	0.430906	0.449335	APT	ns	1.14861	NoSignificance		0	0	0	0	0	0	0	0	2	0
0.137504	0.237504	0.137504	0.137504	0.137504	0.137504	0.137504	1.58496	0.137504	TGME49_263660	APT	0.378747	0.590923	0.241243	RH	0.170837	0.057735	0.0333333	0.430906	0.449335	APT	ns	1.14861	NoSignificance		4	0	0	0	0	0	0	0	2	0
0.137504	0.237504	0.137504	0.137504	0.137504	0.137504	0.137504	1.58496	0.137504	TGME49_220360	APT	0.378747	0.590923	0.241243	RH	0.170837	0.057735	0.0333333	0.430906	0.449335	APT	ns	1.14861	NoSignificance		0	0	0	0	0	0	0	0	2	0
0.137504	0.237504	0.137504	0.137504	0.137504	0.137504	0.137504	1.58496	0.137504	TGME49_272650	APT	0.378747	0.590923	0.241243	RH	0.170837	0.057735	0.0333333	0.430906	0.449335	APT	ns	1.14861	NoSignificance		6	0	0	0	0	0	0	0	2	0
0.137504	0.237504	0.137504	0.137504	0.137504	0.137504	0.137504	1.58496	0.137504	TGME49_310440	APT	0.378747	0.590923	0.241243	RH	0.170837	0.057735	0.0333333	0.430906	0.449335	APT	ns	1.14861	NoSignificance		0	0	0	0	0	0	0	0	2	0
0.137504	0.237504	0.137504	0.137504	0.137504	0.137504	0.137504	1.58496	0.137504	TGME49_208842	APT	0.378747	0.590923	0.241243	RH	0.170837	0.057735	0.0333333	0.430906	0.449335	APT	ns	1.14861	NoSignificance		0	0	0	0	0	0	0	0	2	0
0.137504	0.237504	0.137504	0.137504	0.137504	0.137504	0.137504	1.58496	0.137504	TGME49_306260	APT	0.378747	0.590923	0.241243	RH	0.170837	0.057735	0.0333333	0.430906	0.449335	APT	ns	1.14861	NoSignificance		1	0	0	0	0	0	0	0	2	0
0.137504	0.237504	0.137504	0.137504	0.137504	0.137504	0.137504	1.58496	0.137504	TGME49_273905	APT	0.378747	0.590923	0.241243	RH	0.170837	0.057735	0.0333333	0.430906	0.449335	APT	ns	1.14861	NoSignificance		2	0	0	0	0	0	0	0	2	0
0.137504	0.237504	0.137504	0.137504	0.137504	0.137504	0.137504	1.58496	0.137504	TGME49_268830	APT	0.378747	0.590923	0.241243	RH	0.170837	0.057735	0.0333333	0.430906	0.449335	APT	ns	1.14861	NoSignificance		0	0	0	0	0	0	0	0	2	0
0.137504	0.237504	0.137504	0.137504	0.137504	0.137504	0.137504	1.58496	0.137504	TGME49_308020	APT	0.378747	0.590923	0.241243	RH	0.170837	0.057735	0.0333333	0.430906	0.449335	APT	ns	1.14861	NoSignificance		1	0	0	0	0	0	0	0	2	0
0.137504	0.237504	0.137504	0.137504	0.137504	0.137504	0.137504	1.58496	0.137504	TGME49_207760	APT	0.378747	0.590923	0.241243	RH	0.170837	0.057735	0.0333333	0.430906	0.449335	APT	ns	1.14861	NoSignificance		0	0	0	0	0	0	0	0	2	0
0.137504	0.237504	0.137504	0.137504	0.137504	0.137504	0.137504	1.58496	0.137504	TGME49_267650	APT	0.378747	0.590923	0.241243	RH	0.170837	0.057735	0.0333333	0.430906	0.449335	APT	ns	1.14861	NoSignificance		0	0	0	0	0	0	0	0	2	0
0.137504	0.237504	0.137504	0.137504	0.137504	0.137504	0.137504	1.58496	0.137504	TGME49_217780	APT	0.378747	0.590923	0.241243	RH	0.170837	0.057735	0.0333333	0.430906	0.449335	APT	ns	1.14861	NoSignificance		2	0	0	0	0	0	0	0	2	0
0.137504	0.237504	0.137504	0.137504	0.137504	0.137504	0.137504	1.58496	0.137504	TGME49_320480	APT	0.378747	0.590923	0.241243	RH	0.170837	0.057735	0.0333333	0.430906	0.449335	APT	ns	1.14861	NoSignificance		0	0	0	0	0	0	0	0	2	0
0.137504	0.237504	0.137504	0.137504	1.58496	0.137504	0.137504	0.137504	0.137504	TGME49_311240	APT	0.378747	0.590923	0.241243	RH	0.170837	0.057735	0.0333333	0.430906	0.449335	APT	ns	1.14861	NoSignificance		0	0	0	0	0	2	0	0	0	0
0.137504	0.237504	0.137504	0.137504	1.58496	0.137504	0.137504	0.137504	0.137504	TGME49_260240	APT	0.378747	0.590923	0.241243	RH	0.170837	0.057735	0.0333333	0.430906	0.449335	APT	ns	1.14861	NoSignificance		0	0	0	0	0	2	0	0	0	0
0.137504	0.237504	0.137504	0.137504	1.58496	0.137504	0.137504	0.137504	0.137504	TGME49_223920	APT	0.378747	0.590923	0.241243	RH	0.170837	0.057735	0.0333333	0.430906	0.449335	APT	ns	1.14861	NoSignificance		1	0	0	0	0	2	0	0	0	0
0.137504	0.237504	0.137504	0.137504	1.58496	0.137504	0.137504	0.137504	0.137504	TGME49_311920	APT	0.378747	0.590923	0.241243	RH	0.170837	0.057735	0.0333333	0.430906	0.449335	APT	ns	1.14861	NoSignificance		3	0	0	0	0	2	0	0	0	0
2	0.237504	0.137504	0.137504	0.137504	1	1.58496	3.45943	2.58496	TGME49_261950	APT	1.48406	1.34052	0.547266	RH	0.791669	1.04764	0.604855	0.433185	0.451144	APT	ns	0.906581	NoSignificance		0	3	0	0	0	0	1	2	10	5
0.137504	0.237504	0.137504	0.137504	0.137504	0.137504	0.137504	1	0.137504	TGME49_315940	APT	0.281253	0.352113	0.143749	RH	0.170837	0.057735	0.0333333	0.484988	0.50446	APT	ns	0.719249	NoSignificance		9	0	0	0	0	0	0	0	1	0
2	1.1	0.137504	2	2	0.137504	1.58496	2.58496	1	TGME49_229670	APT	1.55124	0.868908	0.35473	RH	1.07917	0.931423	0.537757	0.506017	0.525674	APT	ns	0.523501	NoSignificance		0	3	1	0	3	3	0	2	5	1
1	0.237504	0.137504	0.137504	0.137504	0.137504	1	2	1	TGME49_291050	APT	0.735418	0.749891	0.306142	RH	0.458336	0.471752	0.272366	0.523123	0.542764	APT	ns	0.682161	NoSignificance		0	1	0	0	0	0	0	1	3	1
2	1.1	0.137504	1.58496	1	0.137504	0.137504	0.137504	1	TGME49_291850	APT	0.666246	0.617338	0.252027	RH	1.07917	0.931423	0.537757	0.538165	0.557674	RH	ns	-0.695793	NoSignificance		0	3	1	0	2	1	0	0	0	1
1	0.237504	0.137504	0.137504	0.137504	0.137504	0.137504	2.32193	1.58496	TGME49_297430	APT	0.742817	0.966273	0.394479	RH	0.458336	0.471752	0.272366	0.571673	0.591657	APT	ns	0.696603	NoSignificance		0	1	0	0	0	0	0	0	4	2
0.137504	0.237504	2	0.137504	0.137504	0.137504	0.137504	1.58496	0.137504	TGME49_254470	APT	0.378747	0.590923	0.241243	RH	0.791669	1.04764	0.604855	0.576298	0.5957	RH	ns	-1.06366	NoSignificance		1	0	0	3	0	0	0	0	2	0
2.58496	0.237504	0.137504	0.137504	3	0.137504	0.137504	3.58496	2.58496	TGME49_230940	APT	1.59707	1.63015	0.665504	RH	0.986657	1.38508	0.799674	0.583852	0.602756	APT	ns	0.69481	NoSignificance		0	5	0	0	0	7	0	0	11	5
2.32193	0.237504	0.137504	1	1	1	1	3	1	TGME49_204400	APT	1.33333	0.816497	0.333333	RH	0.898978	1.23332	0.71206	0.620143	0.639426	APT	ns	0.568679	NoSignificance		0	4	0	0	1	1	1	1	7	1
2.32193	0.237504	0.137504	1	1.58496	0.137504	0.137504	4.52356	1	TGME49_262380	APT	1.39726	1.63086	0.665798	RH	0.898978	1.23332	0.71206	0.629537	0.648306	APT	ns	0.636237	NoSignificance		0	4	0	0	1	2	0	0	22	1
1.58496	1.1	0.137504	1	1	0.137504	1.58496	2.58496	1	TGME49_309820	APT	1.2179	0.814038	0.33233	RH	0.940822	0.736741	0.425358	0.631845	0.649875	APT	ns	0.372408	NoSignificance		0	2	1	0	1	1	0	2	5	1
7.60733	7.52626	7.25739	7.92481	8.00562	7.06609	7.42626	7.6865	7.20945	TGME49_284190	APT	7.55312	0.38265	0.156216	RH	7.46366	0.183178	0.105758	0.649827	0.667542	APT	ns	0.01719	NoSignificance		0	194	171	152	242	256	133	171	205	147
1	0.237504	0.137504	0.137504	0.137504	0.137504	0.137504	4	0.137504	TGME49_236210	APT	0.781253	1.57686	0.643749	RH	0.458336	0.471752	0.272366	0.65931	0.676446	APT	ns	0.769385	NoSignificance		0	1	0	0	0	0	0	0	15	0
3.16993	0.237504	1	0.137504	0.137504	0.137504	0.137504	2.80735	2.58496	TGME49_247550	APT	0.990389	1.32315	0.540175	RH	1.46914	1.52146	0.878416	0.669176	0.685719	RH	ns	-0.568908	NoSignificance		0	8	0	1	0	0	0	0	6	5
1	0.237504	0.137504	0.137504	0.137504	0.137504	0.137504	3.58496	0.137504	TGME49_215590	APT	0.71208	1.40742	0.574576	RH	0.458336	0.471752	0.272366	0.702339	0.718814	APT	ns	0.635635	NoSignificance		0	1	0	0	0	0	0	0	11	0
2	0.237504	0.137504	0.137504	0.137504	0.137504	0.137504	2.32193	0.137504	TGME49_244200	APT	0.501574	0.891788	0.364071	RH	0.791669	1.04764	0.604855	0.704856	0.7205	RH	ns	-0.658434	NoSignificance		0	3	0	0	0	0	0	0	4	0
1	0.237504	0.137504	0.137504	1	0.137504	0.137504	1	1	TGME49_261580	APT	0.568752	0.472409	0.19286	RH	0.458336	0.471752	0.272366	0.756991	0.772839	APT	ns	0.311395	NoSignificance		0	1	0	0	0	1	0	0	1	1
1	0.237504	0.137504	0.137504	0.137504	0.137504	0.137504	2	1	TGME49_250820	APT	0.591669	0.771388	0.314918	RH	0.458336	0.471752	0.272366	0.759038	0.773976	APT	ns	0.368386	NoSignificance		0	1	0	0	0	0	0	0	3	1
1.58496	0.237504	0.137504	0.137504	1.58496	0.137504	0.137504	2	1	TGME49_305850	APT	0.832912	0.825393	0.336965	RH	0.653323	0.808371	0.466713	0.770021	0.78421	APT	ns	0.350368	NoSignificance		0	2	0	0	0	2	0	0	3	1
1	0.237504	0.137504	0.137504	0.137504	0.137504	0.137504	3	0.137504	TGME49_319920	APT	0.614586	1.16861	0.477083	RH	0.458336	0.471752	0.272366	0.784377	0.797851	APT	ns	0.423211	NoSignificance		0	1	0	0	0	0	0	0	7	0
1.58496	1.1	0.137504	0.137504	2	1	0.137504	1.58496	1.58496	TGME49_261250	APT	1.07416	0.79236	0.323479	RH	0.940822	0.736741	0.425358	0.814203	0.827175	APT	ns	0.191209	NoSignificance		0	2	1	0	0	3	1	0	2	2
1	0.237504	1	0.137504	1	0.137504	1	1.58496	0.137504	TGME49_231140	APT	0.666246	0.617338	0.252027	RH	0.745835	0.440228	0.254165	0.831825	0.843456	RH	ns	-0.162802	NoSignificance		0	1	0	1	0	1	0	1	2	0
1	0.237504	0.137504	0.137504	0.137504	0.137504	0.137504	1.58496	0.137504	TGME49_237560	APT	0.378747	0.590923	0.241243	RH	0.458336	0.471752	0.272366	0.835316	0.843456	RH	ns	-0.275171	NoSignificance		0	1	0	0	0	0	0	0	2	0
1	0.237504	0.137504	0.137504	0.137504	0.137504	0.137504	1.58496	0.137504	TGME49_224270	APT	0.378747	0.590923	0.241243	RH	0.458336	0.471752	0.272366	0.835316	0.843456	RH	ns	-0.275171	NoSignificance		0	1	0	0	0	0	0	0	2	0
1	0.237504	0.137504	0.137504	0.137504	0.137504	0.137504	1.58496	0.137504	TGME49_302050	APT	0.378747	0.590923	0.241243	RH	0.458336	0.471752	0.272366	0.835316	0.843456	RH	ns	-0.275171	NoSignificance		0	1	0	0	0	0	0	0	2	0
1	0.237504	0.137504	0.137504	0.137504	0.137504	0.137504	1.58496	0.137504	TGME49_280600	APT	0.378747	0.590923	0.241243	RH	0.458336	0.471752	0.272366	0.835316	0.843456	RH	ns	-0.275171	NoSignificance		0	1	0	0	0	0	0	0	2	0
2	0.237504	0.137504	0.137504	1	0.137504	0.137504	1.58496	1	TGME49_299050	APT	0.666246	0.617338	0.252027	RH	0.791669	1.04764	0.604855	0.861578	0.868915	RH	ns	-0.248843	NoSignificance		0	3	0	0	0	1	0	0	2	1
1	0.237504	0.137504	1	1.58496	0.137504	0.137504	0.137504	0.137504	TGME49_203630	APT	0.522496	0.624455	0.254933	RH	0.458336	0.471752	0.272366	0.869728	0.876068	APT	ns	0.189016	NoSignificance		0	1	0	0	1	2	0	0	0	0
2.80735	0.237504	2.32193	1.58496	2	1	1	3	2.80735	TGME49_310490	APT	1.89872	0.867471	0.354144	RH	1.78893	1.36532	0.788268	0.907352	0.912858	APT	ns	0.0859308	NoSignificance		0	6	0	4	2	3	1	1	7	6
3.58496	0.237504	0.137504	2	1	0.137504	0.137504	2.80735	1	TGME49_269600	APT	1.18039	1.05443	0.430468	RH	1.31999	1.96216	1.13285	0.916608	0.921052	RH	ns	-0.161259	NoSignificance		0	11	0	0	3	1	0	0	6	1
2	0.237504	0.137504	0.137504	1.58496	0.137504	0.137504	2	1	TGME49_229250	APT	0.832912	0.825393	0.336965	RH	0.791669	1.04764	0.604855	0.955921	0.959393	APT	ns	0.073267	NoSignificance		0	3	0	0	0	2	0	0	3	1
1.58496	0.237504	1	1	1	0.137504	1	1.58496	1	TGME49_289530	APT	0.953744	0.463302	0.189142	RH	0.940822	0.675676	0.390102	0.978102	0.980467	APT	ns	0.0196808	NoSignificance		0	2	0	1	1	1	0	1	2	1
0.137504	0.237504	1	0.137504	0.137504	0.137504	0.137504	0.137504	2	TGME49_214080	APT	0.44792	0.760361	0.310416	RH	0.458336	0.471752	0.272366	0.980656	0.981841	RH	ns	-0.0331648	NoSignificance		1	0	0	1	0	0	0	0	0	3
3	0.237504	0.137504	1	1.58496	0.137504	0.137504	3.80735	0.137504	TGME49_309752	APT	1.13414	1.43855	0.587287	RH	1.125	1.62457	0.937943	0.993844	0.993844	APT	ns	0.0116682	NoSignificance		0	7	0	0	1	2	0	0	13	0

## Sheet: Supplementary 2c
Supplementary 2c. List of known apicoplast proteins on the volcano plotting
	Result	PMID
TGME49_221320	ACC1	PMID: 10557330
TGME49_259260	FtsH	PMID: 19450729, PMID: 17822404
TGME49_269190	RNA polymerase Rpb3/Rpb11 dimerisation domain-containing protein	PMID: 17784785
TGME49_233500	Triosephosphate isomerase II	PMID 17449654
TGME49_305980	PDH E3	PMID: 17449654
TGME49_217740	FabG	PMID: 12646215
TGME49_321640	Cdc48Ap	PMID: 19808683
TGME49_222020	Phosphoglycerate kinase II	PMID: 17449654
TGME49_293590	FabB/F	PMID: 12549938, PMID: 16467310
TGME49_312110	Atrx	PMID: 18586952
TGME49_225990	FabD	PMID: 12549938
TGME49_261070	APT	PMID: 17449654, PMID: 17822404, PMID: 20036630
TGME49_201270	hypothetical protein	PMID: 22144892
TGME49_272290	PDH E1 beta	PMID: 17449654, PMID: 15612915
TGME49_253900	HemB (ALAD)	PMID: 14638682
TGME49_273960	Chaperonin 20	PMID: 14747157
TGME49_266760	ICDH2	PMID: 17784785
TGME49_245670	PDH E1 alpha	PMID: 17449654, PMID: 15612915
TGME49_287270	PPC1	PMID: 22144892, PMID: 21498883
TGME49_264080	ACP	PMID: 9770490, PMID: 16920791
TGME49_231890	FabH	PMID: 12270624
TGME49_240600	CPN60	PMID: 14747157
TGME49_272390	TOC75 (OMP85)	PMID: 20042599
TGME49_226400	Lipoate synthase LipA	PMID: 12860390
TGME49_321570	FabZ	PMID: 18274777
TGME49_299070	Pyruvate kinase II	PMID: 19015045
TGME49_286050	TIC22	PMID: 19502580
TGME49_239680	hypothetical protein	PMID: 22144892
TGME49_255690	2C-methyl-D-erythritol 2,4- cyclodiphosphate synthase domain-containing protein (Sethu)	PMID: 22144892
TGME49_297780	GyraseB	PMID: 17499371
TGME49_298990	Plant-type ferredoxin- NADPþ-reductase	PMID: 11056177
TGME49_206610	PDH E2	PMID: 17449654, PMID: 16778769
TGME49_261850	TgPrex	PMID: 19402939
TGME49_295990	Ubiquitin-conjugating enzyme E2	PMID: 19502583
TGME49_239320	BolA family protein	PMID: 22144892 PMID: 22144892
TGME49_221330	TgGyrA	PMID: 22144892
TGME49_211440	hypothetical protein	PMID: 33053376
TGME49_215070	Plant-type ferredoxin	PMID: 11056177
TGME49_291670	DEAD/DEAH box helicase domain-containing protein	PMID: 22144892
TGME49_310770	TgAtrx2	PMID: 22144892

## Sheet: Supplementary 2d
Supplementary 2d. List of TMD proteins identified by APT1-TurboID and ordered from high numbers to low numbers
Accession numbers	Product Description	TMD numbers	Candidates (temporary names)
TGME49_254370	guanylyl cyclase	19	n.a.
TGME49_238950	fatty acyl-CoA desaturase, putative	14	n.a.
TGME49_264870	Sodium:neurotransmitter symporter family protein	14	HAP10
TGME49_214920	GPI-anchored wall transfer protein GWT1, putative	13	n.a.
TGME49_262660	hypothetical protein	12	HAP11
TGME49_226020	transporter, major facilitator family protein	12	HAP12
TGME49_320020	transporter, major facilitator family protein	12	HAP13
TGME49_280400	hypothetical protein	12	HAP14
TGME49_236860	haloacid dehalogenase family hydrolase domain-containing protein	12	n.a.
TGME49_289070	E1-E2 ATPase subfamily protein	11	HAP15
TGME49_297245	transporter, major facilitator family protein	11	HAP4
TGME49_233540	transporter, major facilitator family protein	11	HAP3
TGME49_252340	hypothetical protein	11	HAP16
TGME49_216820	transporter, major facilitator family protein	11	HAP17
TGME49_312100	plasma membrane-type Ca(2+)-ATPase A1 PMCAA1	11	n.a.
TGME49_311080	transporter, cation channel family protein	10	HAP18
TGME49_238390	hypothetical protein	10	HAP19
TGME49_275568	GPI transamidase subunit PIG-U protein	10	n.a.
TGME49_312622	DUF803 domain-containing protein	10	HAP20
TGME49_283730	endomembrane protein 70 subfamily protein	10	HAP21
TGME49_249580	hypothetical protein	10	HAP22
TGME49_270200	hypothetical protein	10	HAP23
TGME49_263690	hypothetical protein	10	HAP24
TGME49_318460	P-type ATPase of unknown pump specificity (type V) protein	9	n.a.
TGME49_261430	hypothetical protein	9	HAP25
TGME49_315940	rhoptry protein, putative	9	n.a.
TGME49_253880	GNS1/SUR4 family protein	9	n.a.
TGME49_223600	hypothetical protein	9	HAP26
TGME49_310140	hypothetical protein	9	HAP27
TGME49_215940	Acetyl-coenzyme A transporter, putative	9	HAP28
TGME49_205040	PGAP1 family protein	8	n.a.
TGME49_291940	hypothetical protein	8	HAP29
TGME49_269980	preprotein translocase Sec61, putative	8	n.a.
TGME49_309580	transporter, major facilitator family protein	8	HAP1
TGME49_237150	minor histocompatibility antigen h13, putative	8	n.a.
TGME49_254580	UDP-galactose transporter family protein	8	HAP30
TGME49_278660	P-type ATPase4, putative	8	HAP31
TGME49_273540	phosphatidylserine synthase, putative	8	n.a.
TGME49_313020	STAS domain-containing protein	8	HAP32
TGME49_209940	transporter/permease protein	8	HAP33
TGME49_208050	ABC transporter, putative	7	HAP34
TGME49_230420	sarco/endoplasmic reticulum Ca2+-ATPase	7	HAP35
TGME49_304750	zinc finger, C3HC4 type (RING finger) domain-containing protein	7	HAP36
TGME49_270220	hypothetical protein	7	HAP37
TGME49_281980	phosphatidate cytidylyltransferase	7	n.a.
TGME49_262610	hypothetical protein	7	HAP38
TGME49_315210	rhoptry protein, putative	7	n.a.
TGME49_241160	hemolysin-III related subfamily protein	7	n.a.
TGME49_216620	EF hand domain-containing protein	7	n.a.
TGME49_319740	transporter, major facilitator family protein	7	HAP39
TGME49_309560	nmda receptor glutamate-binding chain	7	n.a.
TGME49_316260	hypothetical protein	7	HAP40
TGME49_266750	transporter/permease protein, putative	7	HAP41
TGME49_233760	hypothetical protein	7	HAP42
TGME49_307860	hypothetical protein	7	HAP43
TGME49_281640	hypothetical protein	7	HAP44
TGME49_321660	mannosyltransferase, putative	6	n.a.
TGME49_257080	3'5'-cyclic nucleotide phosphodiesterase domain-containing protein	6	n.a.
TGME49_210380	hypothetical protein	6	HAP45
TGME49_261070	apicoplast triosephosphate translocator APT1	6	n.a.
TGME49_321590	hypothetical protein	6	HAP46
TGME49_319550	membrane protein C17G8.08c, putative	6	HAP47
TGME49_278960	hypothetical protein	6	HAP48
TGME49_267690	hypothetical protein	6	HAP2
TGME49_272650	3'5'-cyclic nucleotide phosphodiesterase domain-containing protein	6	n.a.
TGME49_288940	hypothetical protein	5	n.a.
TGME49_286510	hypothetical protein	5	n.a.
TGME49_299110	cleft lip and palate transmembrane protein 1 (clptm1) protein	5	n.a.
TGME49_221180	hypothetical protein	5	n.a.
TGME49_229440	zinc finger, C3HC4 type (RING finger) domain-containing protein	5	n.a.
TGME49_224620	hypothetical protein	4	n.a.
TGME49_256980	glycerol-3-phosphate-acyltransferase	4	n.a.
TGME49_265070	hypothetical protein	4	n.a.
TGME49_268720	Hrf1 family protein	4	n.a.
TGME49_269150	DHHC zinc finger domain-containing protein	4	n.a.
TGME49_285500	hypothetical protein	4	n.a.
TGME49_205240	cleft lip and palate transmembrane protein 1 (clptm1) protein	4	n.a.
TGME49_250870	DHHC zinc finger domain-containing protein	4	n.a.
TGME49_207710	phosphatidylinositol synthase, putative	4	n.a.
TGME49_226710	hypothetical protein	4	n.a.
TGME49_263660	hypothetical protein	4	n.a.
TGME49_267430	DnaJ domain-containing protein	4	n.a.
TGME49_293430	hypothetical protein	4	n.a.
TGME49_214110	protein yipf5, putative	4	n.a.
TGME49_225500	hypothetical protein	4	n.a.
TGME49_247350	thioredoxin domain-containing protein	4	n.a.
TGME49_249900	adenine nucleotide translocator, putative	4	n.a.
TGME49_289570	phosphatidylinositol transfer protein	4	n.a.
TGME49_304990	guanylate-binding protein, N-terminal domain-containing protein	4	n.a.
TGME49_318570	SFT2 family protein	4	n.a.
TGME49_211710	TB2/DP1, HVA22 family protein	3	n.a.
TGME49_260630	DnaJ family Sec63 protein	3	n.a.
TGME49_267590	hypothetical protein	3	n.a.
TGME49_297330	hypothetical protein	3	n.a.
TGME49_299780	hypothetical protein	3	n.a.
TGME49_300100	rhoptry neck protein RON2	3	n.a.
TGME49_310250	hypothetical protein	3	n.a.
TGME49_311920	GRAM domain-containing protein	3	n.a.
TGME49_223910	acyltransferase domain-containing protein	3	n.a.
TGME49_288030	hypothetical protein	3	n.a.
TGME49_304955	serine/threonine specific protein phosphatase	3	n.a.
TGME49_203240	hypothetical protein	3	n.a.
TGME49_226430	reticulon protein	3	n.a.
TGME49_246340	DnaJ domain-containing protein	3	n.a.
TGME49_213910	hypothetical protein	2	n.a.
TGME49_218730	hypothetical protein	2	n.a.
TGME49_233470	hypothetical protein	2	n.a.
TGME49_239540	LEM3 (ligand-effect modulator 3) family / CDC50 family protein	2	n.a.
TGME49_254880	Alpha-galactosidase	2	n.a.
TGME49_257040	TB2/DP1, HVA22 family protein	2	n.a.
TGME49_258870	hypothetical protein	2	n.a.
TGME49_264200	hypothetical protein	2	n.a.
TGME49_267510	hypothetical protein	2	n.a.
TGME49_273460	eukaryotic translation initiation factor 3 subunit 6 interacting protein	2	n.a.
TGME49_291300	RER1 protein, putative	2	n.a.
TGME49_304470	oxidoreductase, putative	2	n.a.
TGME49_203310	dense granule protein GRA7	2	n.a.
TGME49_216540	dolichyl-phosphate beta-glucosyltransferase	2	n.a.
TGME49_229490	tetratricopeptide repeat-containing protein	2	n.a.
TGME49_232050	DnaJ domain-containing protein	2	n.a.
TGME49_232080	hypothetical protein	2	n.a.
TGME49_233220	hypothetical protein	2	n.a.
TGME49_243390	hypothetical protein	2	n.a.
TGME49_246460	hypothetical protein	2	n.a.
TGME49_249300	hypothetical protein	2	n.a.
TGME49_275470	dense granule protein GRA15	2	n.a.
TGME49_293730	DHHC zinc finger domain-containing protein	2	n.a.
TGME49_206320	hypothetical protein	2	n.a.
TGME49_207070	glycosyl transferase, putative	2	n.a.
TGME49_217780	Sec20 protein	2	n.a.
TGME49_221480	hypothetical protein	2	n.a.
TGME49_229030	hypothetical protein	2	n.a.
TGME49_246220	hypothetical protein	2	n.a.
TGME49_247380	hypothetical protein	2	n.a.
TGME49_273905	hypothetical protein	2	n.a.
TGME49_276970	hypothetical protein	2	n.a.
TGME49_292340	zinc finger, C3HC4 type (RING finger) domain-containing protein	2	n.a.
TGME49_299080	VTC domain-containing protein	2	n.a.
TGME49_312660	hypothetical protein	2	n.a.
TGME49_314970	root hair defective 3 gtp-binding protein (rhd3) protein	2	n.a.
TGME49_202630	ATP-dependent metallopeptidase HflB subfamily protein	2	n.a.
TGME49_205100	hypothetical protein	2	n.a.
TGME49_212130	phospholipase, patatin family protein	2	n.a.
TGME49_213790	hypothetical protein	2	n.a.
TGME49_219320	acid phosphatase GAP50	2	n.a.
TGME49_223800	hypothetical protein	2	n.a.
TGME49_230590	chitobiosyldiphosphodolichol beta-mannosyltransferase	2	n.a.
TGME49_235660	hypothetical protein	2	n.a.
TGME49_236640	zinc finger, C3HC4 type (RING finger) domain-containing protein	2	n.a.
TGME49_247290	hypothetical protein	2	n.a.
TGME49_271888	3-ketoacyl-CoA reductase, putative	2	n.a.
TGME49_205250	rhoptry protein ROP18	1	n.a.
TGME49_208560	carrier superfamily protein	1	n.a.
TGME49_209250	hypothetical protein	1	n.a.
TGME49_215980	hypothetical protein	1	n.a.
TGME49_216680	ankyrin repeat-containing protein	1	n.a.
TGME49_222300	hypothetical protein	1	n.a.
TGME49_223920	rhoptry neck protein RON3	1	n.a.
TGME49_236040	fructose-1,6-bisphosphate aldolase	1	n.a.
TGME49_239320	BolA family protein	1	n.a.
TGME49_240280	S1/P1nuclease	1	n.a.
TGME49_240830	hydrolase, alpha/beta fold family protein	1	n.a.
TGME49_246982	hypothetical protein	1	n.a.
TGME49_247000	tetratricopeptide repeat-containing protein	1	n.a.
TGME49_262910	NADH-cytochrome b5 reductase 1, putative	1	n.a.
TGME49_264080	acyl carrier protein ACP	1	n.a.
TGME49_268630	YagE family protein	1	n.a.
TGME49_268690	hypothetical protein	1	n.a.
TGME49_272695	hypothetical protein	1	n.a.
TGME49_277910	thrombospondin type 1 domain-containing protein	1	n.a.
TGME49_278890	hypothetical protein	1	n.a.
TGME49_290160	sortilin, putative	1	n.a.
TGME49_294250	WD domain, G-beta repeat-containing protein	1	n.a.
TGME49_305450	acetyltransferase, GNAT family protein	1	n.a.
TGME49_311230	hypothetical protein	1	n.a.
TGME49_320740	hypothetical protein	1	n.a.
TGME49_321410	hypothetical protein	1	n.a.
TGME49_201840	aspartyl protease ASP1	1	n.a.
TGME49_203970	dolichyl-diphosphooligosaccharide--protein glycosyltransferase	1	n.a.
TGME49_205150	ACR, YagE family COG1723 domain-containing protein	1	n.a.
TGME49_212980	hypothetical protein	1	n.a.
TGME49_214080	toxofilin	1	n.a.
TGME49_215775	rhoptry protein ROP8	1	n.a.
TGME49_219250	acetyltransferase, GNAT family protein	1	n.a.
TGME49_220350	tRNA ligases class II (D, K and N) domain-containing protein	1	n.a.
TGME49_223620	golgi SNARE, putative	1	n.a.
TGME49_230510	hypothetical protein	1	n.a.
TGME49_243290	hypothetical protein	1	n.a.
TGME49_244560	heat shock protein 90, putative	1	n.a.
TGME49_248300	hypothetical protein	1	n.a.
TGME49_255690	2-C-methyl-D-erythritol 2,4-cyclodiphosphate synthase domain-containing protein	1	n.a.
TGME49_259260	membrane protein FtsH1	1	n.a.
TGME49_261850	helicase, putative	1	n.a.
TGME49_262430	4-hydroxy-3-methylbut-2-en-1-yl diphosphate synthase	1	n.a.
TGME49_264440	signal recognition particle receptor beta subunit protein	1	n.a.
TGME49_272390	hypothetical protein	1	n.a.
TGME49_276940	ribosome associated membrane protein RAMP4, putative	1	n.a.
TGME49_278990	phosphate carrier, putative	1	HAP50
TGME49_286620	S1 RNA binding domain-containing protein	1	n.a.
TGME49_288650	dense granule protein GRA12	1	n.a.
TGME49_295990	ubiquitin conjugating enzyme E2, putative	1	n.a.
TGME49_300060	signal peptidase subunit protein	1	n.a.
TGME49_300290	SNARE domain-containing protein	1	n.a.
TGME49_300380	endoplasmic reticulum oxidoreductin, putative	1	n.a.
TGME49_308020	SAG-related sequence SRS57	1	n.a.
TGME49_311720	chaperonin protein BiP	1	n.a.
TGME49_315770	cytochrome p450 superfamily protein	1	n.a.
TGME49_319640	hypothetical protein	1	n.a.
TGME49_205030	hypothetical protein	1	n.a.
TGME49_205700	cyclophilin precursor	1	n.a.
TGME49_205740	hypothetical protein	1	n.a.
TGME49_207440	ribosomal protein RPS4	1	n.a.
TGME49_221320	acetyl-CoA carboxylase ACC1	1	n.a.
TGME49_223125	ubiquitin family protein	1	n.a.
TGME49_226580	hypothetical protein	1	n.a.
TGME49_226600	syntaxin 5, putative	1	n.a.
TGME49_231370	phospholipase, patatin family protein	1	n.a.
TGME49_232180	UBA/TS-N domain-containing protein	1	n.a.
TGME49_234450	ribosomal protein RPS15A	1	n.a.
TGME49_235490	hypothetical protein	1	n.a.
TGME49_236190	hypothetical protein	1	n.a.
TGME49_239680	hypothetical protein	1	n.a.
TGME49_240440	hypothetical protein	1	n.a.
TGME49_240520	hypothetical protein	1	n.a.
TGME49_240600	chaperonin cpn60, putative	1	n.a.
TGME49_244550	hypothetical protein	1	n.a.
TGME49_246610	hypothetical protein	1	n.a.
TGME49_249340	hypothetical protein	1	n.a.
TGME49_254470	hypothetical protein	1	n.a.
TGME49_254690	phospholipase/carboxylesterase	1	n.a.
TGME49_255260	apical membrane antigen AMA1	1	n.a.
TGME49_257520	synaptobrevin protein	1	n.a.
TGME49_258380	elongation factor p (ef-p) kow family domain-containing protein	1	n.a.
TGME49_258730	hypothetical protein	1	n.a.
TGME49_268330	hypothetical protein	1	n.a.
TGME49_269190	glyceraldehyde-3-phosphate dehydrogenase GAPDH2	1	n.a.
TGME49_278630	tetratricopeptide repeat-containing protein	1	n.a.
TGME49_279360	hypothetical protein	1	n.a.
TGME49_286190	hypothetical protein	1	n.a.
TGME49_287270	hypothetical protein	1	n.a.
TGME49_294220	hypothetical protein	1	n.a.
TGME49_295110	rhoptry protein ROP7	1	n.a.
TGME49_295125	rhoptry protein ROP4	1	n.a.
TGME49_298990	ferredoxin NADP+ oxidoreductase FNR	1	n.a.
TGME49_299070	pyruvate kinase PyKII	1	n.a.
TGME49_306260	hypothetical protein	1	n.a.
TGME49_313080	hypothetical protein	1	n.a.
TGME49_313540	hypothetical protein	1	n.a.
TGME49_313640	hypothetical protein	1	n.a.
TGME49_320588	glycosyl hydrolases family 35 protein	1	n.a.
TGME49_321640	cell division protein CDC48AP	1	n.a.
TGME49_201780	microneme protein MIC2	1	n.a.
TGME49_204060	SNARE domain-containing protein	1	n.a.
TGME49_215785	rhoptry protein ROP2A	1	n.a.
TGME49_218520	microneme protein MIC6	1	n.a.
TGME49_220890	hypothetical protein	1	n.a.
TGME49_224350	aminopeptidase N, putative	1	n.a.
TGME49_225990	acyl transferase domain-containing protein	1	n.a.
TGME49_230610	transmembrane protein TMEM222	1	n.a.
TGME49_231000	START domain-containing protein	1	n.a.
TGME49_238040	protein disulfide-isomerase domain-containing protein	1	n.a.
TGME49_240860	acyltransferase domain-containing protein	1	n.a.
TGME49_246550	aspartyl protease ASP3	1	n.a.
TGME49_247195	microneme protein MIC15	1	n.a.
TGME49_247580	glutaredoxin domain-containing protein	1	n.a.
TGME49_248100	synaptobrevin protein	1	n.a.
TGME49_253650	DnaJ C terminal region domain-containing protein	1	n.a.
TGME49_255980	hypothetical protein	1	n.a.
TGME49_258180	hypothetical protein	1	n.a.
TGME49_258640	adenylate kinase superfamily protein	1	n.a.
TGME49_258826	hypothetical protein	1	n.a.
TGME49_269340	hypothetical protein	1	n.a.
TGME49_270240	MAG1	1	n.a.
TGME49_280740	signal peptidase	1	n.a.
TGME49_286630	redoxin domain-containing protein	1	n.a.
TGME49_289360	hypothetical protein	1	n.a.
TGME49_293590	3-oxoacyl-acyl-carrier protein synthase I/II, putative	1	n.a.
TGME49_297745	hypothetical protein	1	n.a.
TGME49_310750	emp24/gp25L/p24 family protein	1	n.a.
TGME49_310770	hypothetical protein	1	n.a.
TGME49_314460	hypothetical protein	1	n.a.
TGME49_318160	MSP (Major sperm protein) domain-containing protein	1	n.a.
TGME49_201700	WD domain, G-beta repeat-containing protein	0	n.a.
TGME49_202680	peptidase M16, alpha subunit, putative	0	n.a.
TGME49_202690	DNA-directed RNA polymerase II RPB9	0	n.a.
TGME49_203780	hypothetical protein	0	n.a.
TGME49_205550	AGC kinase	0	n.a.
TGME49_206590	calcium-dependent protein kinase CDPK2A	0	n.a.
TGME49_208830	hypothetical protein	0	n.a.
TGME49_208842	DEAD/DEAH box helicase domain-containing protein	0	n.a.
TGME49_209100	PUB domain-containing protein	0	n.a.
TGME49_210690	ribosomal protein RPS6	0	n.a.
TGME49_210700	hypothetical protein	0	n.a.
TGME49_211680	protein disulfide isomerase	0	n.a.
TGME49_213072	Sec1 family protein	0	n.a.
TGME49_213350	ribosomal protein RPS15	0	n.a.
TGME49_213392	surface antigen repeat-containing protein	0	n.a.
TGME49_214770	small GTP binding protein rab1a, putative	0	n.a.
TGME49_215460	ribosomal protein RPS24	0	n.a.
TGME49_216260	eukaryotic initiation factor-2B, gamma subunit, putative	0	n.a.
TGME49_217590	50S ribosomal protein L17, putative	0	n.a.
TGME49_218560	acetyl-coA carboxylase ACC2	0	n.a.
TGME49_219720	Ras-related protein Rab-5C, putative	0	n.a.
TGME49_221360	hypothetical protein	0	n.a.
TGME49_224600	GTP binding protein	0	n.a.
TGME49_224980	hypothetical protein	0	n.a.
TGME49_225080	ribosomal protein RPS18	0	n.a.
TGME49_226340	hypothetical protein	0	n.a.
TGME49_226730	aconitate hydratase ACN/IRP	0	n.a.
TGME49_226970	ribosomal protein RPS11	0	n.a.
TGME49_227030	hypothetical protein	0	n.a.
TGME49_228400	WD domain, G-beta repeat-containing protein	0	n.a.
TGME49_228470	ribosomal protein RPL15	0	n.a.
TGME49_229650	josephin protein	0	n.a.
TGME49_230000	hypothetical protein	0	n.a.
TGME49_230520	cyclophilin 1, putative	0	n.a.
TGME49_231070	protein kinase	0	n.a.
TGME49_231140	ribosomal protein RPS25	0	n.a.
TGME49_232350	lactate dehydrogenase LDH1	0	n.a.
TGME49_232440	Brf1p family coiled coil protein	0	n.a.
TGME49_233460	SAG-related sequence SRS29B	0	n.a.
TGME49_236620	protein kinase (incomplete catalytic triad)	0	n.a.
TGME49_236650	DEAD (Asp-Glu-Ala-Asp) box polypeptide 17	0	n.a.
TGME49_239260	histone H4	0	n.a.
TGME49_239620	5'-nucleotidase, C-terminal domain-containing protein	0	n.a.
TGME49_239760	ribosomal protein RPL22	0	n.a.
TGME49_242070	cAMP-dependent protein kinase regulatory subunit	0	n.a.
TGME49_242830	XRN 5'-3' exonuclease N-terminus protein	0	n.a.
TGME49_243710	t-complex protein beta subunit	0	n.a.
TGME49_243730	rhoptry protein ROP9	0	n.a.
TGME49_244700	NAD(+)/NADH kinase domain-containing protein	0	n.a.
TGME49_244910	MIZ/SP-RING zinc finger domain-containing protein	0	n.a.
TGME49_245460	ribosomal protein RPS8	0	n.a.
TGME49_245670	pyruvate dehydrogenase complex subunit PDH-E1Alpha	0	n.a.
TGME49_247550	heat shock protein HSP60	0	n.a.
TGME49_248700	alveolin domain containing intermediate filament IMC12	0	n.a.
TGME49_248880	GTPase RAB7	0	n.a.
TGME49_249550	hypothetical protein	0	n.a.
TGME49_251590	hypothetical protein	0	n.a.
TGME49_253890	peptidase M16 inactive domain-containing protein	0	n.a.
TGME49_254770	Ser/Thr phosphatase family protein	0	n.a.
TGME49_256760	pyruvate kinase PyK1	0	n.a.
TGME49_256830	SacI domain-containing protein	0	n.a.
TGME49_258090	hypothetical protein	0	n.a.
TGME49_260550	acetyltransferase, GNAT family protein	0	n.a.
TGME49_261250	histone H2A1	0	n.a.
TGME49_261950	ATP synthase beta subunit ATP-B	0	n.a.
TGME49_262390	TLD protein	0	n.a.
TGME49_262990	hypothetical protein	0	n.a.
TGME49_263050	ribosomal protein RPL13	0	n.a.
TGME49_263090	14-3-3 protein	0	n.a.
TGME49_266060	ribosomal protein RPSA	0	n.a.
TGME49_266070	ribosomal protein RPL31	0	n.a.
TGME49_266640	Acetyl-coenzyme A synthetase 2, putative	0	n.a.
TGME49_266960	beta tubulin	0	n.a.
TGME49_266990	beta-COP	0	n.a.
TGME49_267330	fumarate hydratase	0	n.a.
TGME49_267400	ribosomal protein RPL32	0	n.a.
TGME49_267530	hypothetical protein	0	n.a.
TGME49_267800	dynamin-related protein DRPA	0	n.a.
TGME49_269180	MIF4G domain-containing protein	0	n.a.
TGME49_272910	T-complex protein 1 delta subunit	0	n.a.
TGME49_273370	coatomer gamma 2-subunit protein, putative	0	n.a.
TGME49_274130	TBC domain-containing protein	0	n.a.
TGME49_275350	TBC domain-containing protein	0	n.a.
TGME49_276140	ADP ribosylation factor ARF1	0	n.a.
TGME49_279380	hypothetical protein	0	n.a.
TGME49_279390	proliferation-associated protein 2G4, putative	0	n.a.
TGME49_285700	ubiquitin fusion degradation protein UFD1AP	0	n.a.
TGME49_287970	hypothetical protein	0	n.a.
TGME49_288380	heat shock protein HSP90	0	n.a.
TGME49_288800	endonuclease/exonuclease/phosphatase family protein	0	n.a.
TGME49_288830	NADH dehydrogenase (NDH2-II)	0	n.a.
TGME49_289230	50S ribosomal protein L12, putative	0	n.a.
TGME49_289330	ubiquitin carboxyl-terminal hydrolase family 2 protein	0	n.a.
TGME49_289690	glyceraldehyde-3-phosphate dehydrogenase GAPDH1	0	n.a.
TGME49_290600	succinyl-CoA-synthetase alpha SCSA	0	n.a.
TGME49_290670	leucyl aminopeptidase LAP	0	n.a.
TGME49_291850	ribosomal protein RPS30	0	n.a.
TGME49_291960	rhoptry kinase family protein ROP40 (incomplete catalytic triad)	0	n.a.
TGME49_294630	hypothetical protein	0	n.a.
TGME49_294890	hypothetical protein	0	n.a.
TGME49_295000	hypothetical protein	0	n.a.
TGME49_296010	phosphatidylinositol 3- and 4-kinase	0	n.a.
TGME49_300000	ribosomal protein RPL18	0	n.a.
TGME49_301120	acetyl-CoA acetyltransferase	0	n.a.
TGME49_302050	elongation factor tu, apicoplast, putative	0	n.a.
TGME49_304630	ATG C terminal domain-containing protein	0	n.a.
TGME49_304670	leucine rich repeat-containing protein	0	n.a.
TGME49_305610	hypothetical protein	0	n.a.
TGME49_306650	hypothetical protein	0	n.a.
TGME49_308010	hypothetical protein	0	n.a.
TGME49_310430	Hsp90 domain-containing protein	0	n.a.
TGME49_310440	membrane occupation and recognition nexus protein MORN1	0	n.a.
TGME49_310490	ribosomal protein RPL27A	0	n.a.
TGME49_311310	protein phosphatase 2B catalytic subunit, calcineurin family phosphatse superfamily protein	0	n.a.
TGME49_312090	ribosomal protein RPL23	0	n.a.
TGME49_312110	apicoplast-associated thioredoxin family protein Atrx1	0	n.a.
TGME49_312480	uracil phosphoribosyltransferase FUR1, putative	0	n.a.
TGME49_313270	hypothetical protein	0	n.a.
TGME49_313310	DnaJ domain-containing protein	0	n.a.
TGME49_313380	hypothetical protein	0	n.a.
TGME49_315860	EF hand domain-containing protein	0	n.a.
TGME49_320690	gamma-soluble NSF attachment protein, putative	0	n.a.
TGME49_321570	beta-hydroxyacyl-acyl carrier protein dehydratase (FABZ)	0	n.a.
TGME49_200280	WD domain, G-beta repeat-containing protein	0	n.a.
TGME49_201270	hypothetical protein	0	n.a.
TGME49_201680	eukaryotic initiation factor-3 subunit 10, putative	0	n.a.
TGME49_202190	hypothetical protein	0	n.a.
TGME49_203160	hypothetical protein	0	n.a.
TGME49_204020	ribosomal protein RPL8	0	n.a.
TGME49_205380	fructose-bisphospatase I	0	n.a.
TGME49_206300	hypothetical protein	0	n.a.
TGME49_206610	pyruvate dehydrogenase complex subunit PDH-E2	0	n.a.
TGME49_207060	ribonucleoside-diphosphate reductase small subunit	0	n.a.
TGME49_207620	pyridine nucleotide-disulfide oxidoreductase domain-containing protein	0	n.a.
TGME49_209450	TLD protein	0	n.a.
TGME49_211440	hypothetical protein	0	n.a.
TGME49_212290	ribosomal protein RPS19	0	n.a.
TGME49_213010	hypothetical protein	0	n.a.
TGME49_214850	1-deoxy-D-xylulose 5-phosphate reductoisomerase, putative	0	n.a.
TGME49_215590	flavoprotein subunit of succinate dehydrogenase	0	n.a.
TGME49_216000	alveolin domain containing intermediate filament IMC3	0	n.a.
TGME49_216630	trigger factor protein, putative	0	n.a.
TGME49_216670	FUSE-binding protein 2 / KH-type splicing regulatory protein	0	n.a.
TGME49_217740	3-ketoacyl-(acyl-carrier-protein) reductase	0	n.a.
TGME49_219682	pyruvate dehydrogenase kinase, putative	0	n.a.
TGME49_220230	leucine rich repeat-containing protein	0	n.a.
TGME49_221620	beta-tubulin, putative	0	n.a.
TGME49_222070	elongation factor Tu GTP binding domain-containing protein	0	n.a.
TGME49_223050	ribosomal protein RPS20	0	n.a.
TGME49_223140	tRNA binding domain-containing protein	0	n.a.
TGME49_223760	hypothetical protein	0	n.a.
TGME49_223940	GAP45	0	n.a.
TGME49_224090	enoyl-CoA hydratase/isomerase family protein	0	n.a.
TGME49_224270	hypothetical protein	0	n.a.
TGME49_226390	hypothetical protein	0	n.a.
TGME49_226960	phosphofructokinase PFKII	0	n.a.
TGME49_227420	4-hydroxy-3-methylbut-2-enyl diphosphate reductase	0	n.a.
TGME49_227610	hypothetical protein	0	n.a.
TGME49_227948	peptidase M16 inactive domain-containing protein	0	n.a.
TGME49_228130	hypothetical protein	0	n.a.
TGME49_229000	kelch repeat-containing protein	0	n.a.
TGME49_229670	ribosomal protein RPS23	0	n.a.
TGME49_230140	vacuolar sorting protein 9 (vps9) domain-containing protein	0	n.a.
TGME49_230160	hypothetical protein	0	n.a.
TGME49_230210	alveolin domain containing intermediate filament IMC10	0	n.a.
TGME49_230690	LNS2 (Lipin/Ned1/Smp2) protein	0	n.a.
TGME49_230860	hypothetical protein	0	n.a.
TGME49_231640	alveolin domain containing intermediate filament IMC1	0	n.a.
TGME49_232300	ribosomal protein RPS3	0	n.a.
TGME49_232620	hypothetical protein	0	n.a.
TGME49_232710	ribosomal protein RPS3A	0	n.a.
TGME49_233500	triose-phosphate isomerase TPI-II	0	n.a.
TGME49_233530	hypothetical protein	0	n.a.
TGME49_233680	nuclear movement family protein	0	n.a.
TGME49_234420	ATPase, AAA family protein	0	n.a.
TGME49_235620	deoxyhypusine synthase	0	n.a.
TGME49_235970	eukaryotic initiation factor-2 gamma, putative	0	n.a.
TGME49_236210	peptidase M16 family potein, putative	0	n.a.
TGME49_236840	zinc finger (C-x8-C-x5-C-x3-H)-2, putative	0	n.a.
TGME49_236930	hypothetical protein	0	n.a.
TGME49_237460	hypothetical protein	0	n.a.
TGME49_238010	ribosomal protein RPL23A	0	n.a.
TGME49_238050	nuclease and tudor domain-containing protein	0	n.a.
TGME49_238170	hypothetical protein	0	n.a.
TGME49_239752	hypothetical protein	0	n.a.
TGME49_240220	hypothetical protein	0	n.a.
TGME49_240430	glyoxalase family protein	0	n.a.
TGME49_243410	tetratricopeptide repeat-containing protein	0	n.a.
TGME49_244110	nucleosome assembly protein (nap) protein	0	n.a.
TGME49_244840	zinc knuckle domain-containing protein	0	n.a.
TGME49_245560	hypothetical protein	0	n.a.
TGME49_245680	ribosomal protein RPL21	0	n.a.
TGME49_246600	ABC1 family protein	0	n.a.
TGME49_247600	hypothetical protein	0	n.a.
TGME49_247760	AMP-binding enzyme domain-containing protein	0	n.a.
TGME49_248340	GTP-binding nuclear protein ran/tc4	0	n.a.
TGME49_249250	ribosomal protein RPL35A	0	n.a.
TGME49_249270	protein disulfide isomerase-related protein (provisional), putative	0	n.a.
TGME49_249390	glutamate/leucine/phenylalanine/valine dehydrogenase family protein	0	n.a.
TGME49_250790	hypothetical protein	0	n.a.
TGME49_250820	hypothetical protein	0	n.a.
TGME49_251500	eukaryotic initiation factor-3, subunit 3, putative	0	n.a.
TGME49_253350	hypothetical protein	0	n.a.
TGME49_253430	asparagine synthetase, putative	0	n.a.
TGME49_253900	parasite porphobilinogen synthase PBGS	0	n.a.
TGME49_254120	autophagy-related protein 8 atg8, putative	0	n.a.
TGME49_256840	hypothetical protein	0	n.a.
TGME49_258540	phosphoglycerate mutase family protein	0	n.a.
TGME49_258580	rhoptry protein ROP17	0	n.a.
TGME49_258970	hypothetical protein	0	n.a.
TGME49_259720	hypothetical protein	0	n.a.
TGME49_260240	ccr4-associated factor family protein	0	n.a.
TGME49_260600	Pumilio-family RNA binding repeat-containing protein	0	n.a.
TGME49_262040	SAC3/GANP family protein	0	n.a.
TGME49_262050	rhoptry kinase family protein ROP39	0	n.a.
TGME49_262670	ribosomal protein RPL18A	0	n.a.
TGME49_262960	U1 snRNP-associated protein Usp106, putative	0	n.a.
TGME49_263040	ribosomal protein RPS16	0	n.a.
TGME49_264090	hypothetical protein	0	n.a.
TGME49_267080	26S protease regulatory subunit 4, putative	0	n.a.
TGME49_267100	protein phosphatase 2C domain-containing protein	0	n.a.
TGME49_267810	Rab 5	0	n.a.
TGME49_268950	hypothetical protein	0	n.a.
TGME49_270530	ubiquitin fusion degradation protein UFD1CY	0	n.a.
TGME49_272640	eukaryotic initiation factor-2B, epsilon subunit, putative	0	n.a.
TGME49_273070	GTPase activating protein for adp ribosylation factor, putative	0	n.a.
TGME49_273760	heat shock protein HSP70	0	n.a.
TGME49_273800	WD domain, G-beta repeat-containing protein	0	n.a.
TGME49_273920	aldose reductase, putative	0	n.a.
TGME49_280600	histidyl-tRNA synthetase (HisRS), putative	0	n.a.
TGME49_285220	CAP-Gly domain-containing protein	0	n.a.
TGME49_286580	hypothetical protein	0	n.a.
TGME49_289820	TBC domain-containing protein	0	n.a.
TGME49_290980	glycine C-acetyltransferase, putative	0	n.a.
TGME49_291670	DEAD/DEAH box helicase domain-containing protein	0	n.a.
TGME49_291680	Sec23/Sec24 trunk domain-containing protein	0	n.a.
TGME49_292130	ribosomal protein RPL13A	0	n.a.
TGME49_294730	hypothetical protein	0	n.a.
TGME49_294898	tetratricopeptide repeat-containing protein	0	n.a.
TGME49_295650	hypothetical protein	0	n.a.
TGME49_297720	trehalose-phosphatase	0	n.a.
TGME49_297780	ATPase/histidine kinase/DNA gyrase B/HSP90 domain-containing protein	0	n.a.
TGME49_298610	GYF domain-containing protein	0	n.a.
TGME49_299210	CTP synthase	0	n.a.
TGME49_300120	aminotransferase, class V superfamily protein	0	n.a.
TGME49_300260	threonyl-tRNA synthetase family protein	0	n.a.
TGME49_305140	phospholipase, patatin family protein	0	n.a.
TGME49_307610	elongation factor TS, putative	0	n.a.
TGME49_308090	rhoptry protein ROP5	0	n.a.
TGME49_308580	Lon protease family protein	0	n.a.
TGME49_309210	peroxiredoxin 6, putative	0	n.a.
TGME49_309752	succinate-Coenzyme A ligase, beta subunit, putative	0	n.a.
TGME49_310270	hypothetical protein	0	n.a.
TGME49_312140	hypothetical protein	0	n.a.
TGME49_313230	eukaryotic initiation factor-2, alpha subunit	0	n.a.
TGME49_313240	ethylene-responsive RNA helicase, putative	0	n.a.
TGME49_313670	adaptin n terminal region domain-containing protein	0	n.a.
TGME49_314070	hypothetical protein	0	n.a.
TGME49_314780	myosin G	0	n.a.
TGME49_316400	alpha tubulin TUBA1	0	n.a.
TGME49_318510	N-ethylmaleimide-sensitive fusion protein, putative	0	n.a.
TGME49_319920	2-oxo acid dehydrogenases acyltransferase (catalytic domain) domain-containing protein	0	n.a.
TGME49_320480	Rab11b	0	n.a.
TGME49_320670	vacuolar protein sorting 16, putative	0	n.a.
TGME49_325800	EGF family domain-containing protein	0	n.a.
TGME49_201380	chorismate synthase, putative	0	n.a.
TGME49_202070	hypothetical protein	0	n.a.
TGME49_203390	CRAL/TRIO domain-containing protein	0	n.a.
TGME49_203910	TBC domain-containing protein	0	n.a.
TGME49_204050	subtilisin SUB1	0	n.a.
TGME49_205130	hypothetical protein	0	n.a.
TGME49_205470	translation elongation factor 2 family protein, putative	0	n.a.
TGME49_209030	actin ACT1	0	n.a.
TGME49_209420	hypothetical protein	0	n.a.
TGME49_210270	hypothetical protein	0	n.a.
TGME49_212260	Sjogren's syndrome/scleroderma autoantigen 1 (Autoantigen p27) protein	0	n.a.
TGME49_214090	signal peptidase	0	n.a.
TGME49_214600	hypothetical protein	0	n.a.
TGME49_214970	DNA replication licensing factor, putative	0	n.a.
TGME49_215070	ferodoxin FD	0	n.a.
TGME49_215260	carbamoylphosphate synthetase	0	n.a.
TGME49_215380	hypothetical protein	0	n.a.
TGME49_216650	S15 sporozoite-expressed protein	0	n.a.
TGME49_216900	cytokine induced apoptosis inhibitor 1 family protein	0	n.a.
TGME49_217460	glutaminyl-tRNA synthetase (GlnRS)	0	n.a.
TGME49_217890	alkyl hydroperoxide reductase/ Thiol specific antioxidant/ Mal allergen, putative	0	n.a.
TGME49_219460	hypothetical protein	0	n.a.
TGME49_219850	prolyl-tRNA synthetase (ProRS)	0	n.a.
TGME49_220090	hypothetical protein	0	n.a.
TGME49_221330	DNA gyrase/topoisomerase IV, A subunit domain-containing protein	0	n.a.
TGME49_221522	adaptor complexes medium subunit family protein	0	n.a.
TGME49_221922	NifU family domain-containing protein	0	n.a.
TGME49_222020	phosphoglycerate kinase PGKII	0	n.a.
TGME49_222860	eukaryotic translation initiation factor, putative	0	n.a.
TGME49_223420	DnaJ domain-containing protein	0	n.a.
TGME49_224850	polyadenylate binding protein, putative	0	n.a.
TGME49_224890	hypothetical protein	0	n.a.
TGME49_226400	lipoic acid synthase LIPA	0	n.a.
TGME49_227150	glutaredoxin, putative	0	n.a.
TGME49_227600	ribosomal protein RPL34	0	n.a.
TGME49_227620	dense granule protein GRA2	0	n.a.
TGME49_228750	calcium dependent protein kinase CDPK7	0	n.a.
TGME49_229250	ribosomal protein RPL28	0	n.a.
TGME49_230340	hypothetical protein	0	n.a.
TGME49_230940	hypothetical protein	0	n.a.
TGME49_231890	beta-ketoacyl-acyl carrier protein synthase III, putative	0	n.a.
TGME49_232230	ribosomal protein RPL30	0	n.a.
TGME49_232250	catalase	0	n.a.
TGME49_232280	hypothetical protein	0	n.a.
TGME49_232340	protein phosphatase 2C domain-containing protein	0	n.a.
TGME49_232550	hypothetical protein	0	n.a.
TGME49_235160	hypothetical protein	0	n.a.
TGME49_235470	myosin A	0	n.a.
TGME49_236910	U2 snRNP auxiliary factor, putative	0	n.a.
TGME49_237210	Tyrosine kinase-like (TKL) protein	0	n.a.
TGME49_238250	ribosomal protein RPL36	0	n.a.
TGME49_239820	D-3-phosphoglycerate dehydrogenase	0	n.a.
TGME49_239870	CBS domain-containing protein	0	n.a.
TGME49_240510	hypothetical protein	0	n.a.
TGME49_242010	glucose inhibited division protein A subfamily protein	0	n.a.
TGME49_242660	vacuolar sorting protein 35, putative	0	n.a.
TGME49_243200	hypothetical protein	0	n.a.
TGME49_243570	ribosomal protein RPS26	0	n.a.
TGME49_243800	long-chain fatty acid CoA ligase, putative	0	n.a.
TGME49_244200	2-oxoglutarate dehydrogenase e1 component, mitochondrial precursor, putative	0	n.a.
TGME49_244380	cactin	0	n.a.
TGME49_246080	NAD dependent epimerase/dehydratase family protein	0	n.a.
TGME49_246100	phosducin, putative	0	n.a.
TGME49_247510	fructose-bisphospatase II	0	n.a.
TGME49_248770	hypothetical protein	0	n.a.
TGME49_249310	hypothetical protein	0	n.a.
TGME49_249630	glutathione S-transferase, N-terminal domain-containing protein	0	n.a.
TGME49_249860	hypothetical protein	0	n.a.
TGME49_250770	eukaryotic initiation factor-4A, putative	0	n.a.
TGME49_251690	seryl-tRNA synthetase, cytoplasmic, putative	0	n.a.
TGME49_252290	importin alpha, putative	0	n.a.
TGME49_253000	ELMO/CED-12 family protein	0	n.a.
TGME49_253440	cell-cycle-associated protein kinase SRPK, putative	0	n.a.
TGME49_255250	tRNA (cytosine(34)-C(5))-methyltransferase, putative	0	n.a.
TGME49_257340	Ras family protein	0	n.a.
TGME49_259550	dihydropteroate synthase	0	n.a.
TGME49_259950	carbonate dehydratase, eukaryotic-type domain-containing protein	0	n.a.
TGME49_261580	histone H2AX	0	n.a.
TGME49_262380	elongation factor Tu, putative	0	n.a.
TGME49_262620	RNA recognition motif-containing protein	0	n.a.
TGME49_263300	eukaryotic porin protein	0	n.a.
TGME49_263320	hypothetical protein	0	n.a.
TGME49_264420	lipoprotein, putative	0	n.a.
TGME49_264430	hypothetical protein	0	n.a.
TGME49_264760	Oxysterol-binding protein	0	n.a.
TGME49_264940	kelch repeat-containing protein	0	n.a.
TGME49_268200	RNA recognition motif-containing protein	0	n.a.
TGME49_268340	glycosyltransferase family 28 C-terminal domain-containing protein	0	n.a.
TGME49_268430	hypothetical protein	0	n.a.
TGME49_268830	hypothetical protein	0	n.a.
TGME49_269390	CRAL/TRIO domain-containing protein	0	n.a.
TGME49_269480	adaptor complexes medium subunit family protein	0	n.a.
TGME49_269600	biotin-requiring enzyme domain-containing protein	0	n.a.
TGME49_270510	asparaginyl-tRNA synthetase (NOB+tRNA synthase)	0	n.a.
TGME49_270910	acyltransferase domain-containing protein	0	n.a.
TGME49_271470	hypothetical protein	0	n.a.
TGME49_275690	ClpB, putative	0	n.a.
TGME49_276210	phosphoglycerate mutase family protein	0	n.a.
TGME49_278470	hypothetical protein	0	n.a.
TGME49_278780	hypothetical protein	0	n.a.
TGME49_278830	glucose-6-phosphate 1-dehydrogenase	0	n.a.
TGME49_278870	myosin F	0	n.a.
TGME49_280370	hypothetical protein	0	n.a.
TGME49_280560	selenide, water dikinase	0	n.a.
TGME49_283850	peptidyl-prolyl cis-trans isomerase	0	n.a.
TGME49_284190	pyruvate carboxylase	0	n.a.
TGME49_284560	ribosomal protein RPL9	0	n.a.
TGME49_285980	glucosephosphate-mutase GPM1	0	n.a.
TGME49_286050	hypothetical protein	0	n.a.
TGME49_286230	hypothetical protein	0	n.a.
TGME49_286420	elongation factor 1-alpha (EF-1-ALPHA), putative	0	n.a.
TGME49_286520	hypothetical protein	0	n.a.
TGME49_288600	WD domain, G-beta repeat-containing protein	0	n.a.
TGME49_288720	ribosomal protein RPL10	0	n.a.
TGME49_289000	hypothetical protein	0	n.a.
TGME49_289530	ribosomal protein RPL19	0	n.a.
TGME49_289600	heat shock protein HSP29	0	n.a.
TGME49_289750	ribosomal-ubiquitin protein RPL40	0	n.a.
TGME49_289760	hypothetical protein	0	n.a.
TGME49_290660	RNA recognition motif-containing protein	0	n.a.
TGME49_290950	clathrin heavy chain, putative	0	n.a.
TGME49_290970	8-amino-7-oxononanoate synthase	0	n.a.
TGME49_291050	histone kinase SNF1, putative	0	n.a.
TGME49_291180	hypothetical protein	0	n.a.
TGME49_293180	NADP-specific glutamate dehydrogenase	0	n.a.
TGME49_294360	ubiquitin specific protease 39 isoform 2, putative	0	n.a.
TGME49_294620	eukaryotic initiation factor-3, subunit 8, putative	0	n.a.
TGME49_294670	translation initiation factor 3 subunit	0	n.a.
TGME49_295080	hypothetical protein	0	n.a.
TGME49_297060	phosphoglycerate mutase PGMII	0	n.a.
TGME49_297220	AMP-binding enzyme domain-containing protein	0	n.a.
TGME49_297430	hypothetical protein	0	n.a.
TGME49_297925	HesB-like domain-containing protein	0	n.a.
TGME49_300200	histone H2AZ	0	n.a.
TGME49_305850	RNA recognition motif-containing protein	0	n.a.
TGME49_308920	splicing factor U2AF protein	0	n.a.
TGME49_309120	ribosomal protein RPL4	0	n.a.
TGME49_309590	rhoptry protein ROP1	0	n.a.
TGME49_310080	AMP-binding enzyme domain-containing protein	0	n.a.
TGME49_310950	AP2 domain transcription factor AP2XI-3	0	n.a.
TGME49_311240	DnaJ family chaperone, putative	0	n.a.
TGME49_311430	fibrillarin	0	n.a.
TGME49_312050	small GTPase Rab2, putative	0	n.a.
TGME49_312380	tetratricopeptide repeat-containing protein	0	n.a.
TGME49_313010	DEAD (Asp-Glu-Ala-Asp) box polypeptide DDX6	0	n.a.
TGME49_313140	isocitrate dehydrogenase	0	n.a.
TGME49_313360	hypothetical protein	0	n.a.
TGME49_313580	cytochrome b5 family heme/steroid binding domain-containing protein	0	n.a.
TGME49_313790	hypothetical protein	0	n.a.
TGME49_314390	hypothetical protein	0	n.a.
TGME49_314810	ribosomal protein RPL7	0	n.a.
TGME49_315270	hypothetical protein	0	n.a.
TGME49_318710	ATP-binding cassette sub-family F member 1	0	n.a.
TGME49_320000	SCY kinase (incomplete catalytic triad)	0	n.a.
TGME49_320220	ubiquinol cytochrome c oxidoreductase, putative	0	n.a.
TGME49_321680	hypothetical protein	0	n.a.
TGME49_203630	ribosomal protein RPL44	0	n.a.
TGME49_204400	ATPase synthase subunit alpha, putative	0	n.a.
TGME49_205320	hypothetical protein	0	n.a.
TGME49_206450	autophagy-related cysteine peptidase atg4, putative	0	n.a.
TGME49_207370	hypothetical protein	0	n.a.
TGME49_207640	isoleucyl-tRNA synthetase family protein	0	n.a.
TGME49_207760	DnaJ C terminal region domain-containing protein	0	n.a.
TGME49_209600	hypothetical protein	0	n.a.
TGME49_212210	hypothetical protein	0	n.a.
TGME49_213050	hypothetical protein	0	n.a.
TGME49_214120	hypothetical protein	0	n.a.
TGME49_214180	ENTH domain-containing protein	0	n.a.
TGME49_214440	4'-phosphopantetheinyl transferase superfamily protein	0	n.a.
TGME49_214620	hypoxia- inducible factor prolyl hydroxylase (phd2), putative	0	n.a.
TGME49_214750	hypothetical protein	0	n.a.
TGME49_215060	small GTP-binding protein sar1, putative	0	n.a.
TGME49_215420	SNARE protein	0	n.a.
TGME49_215700	phosphatidylinositol 3- and 4-kinase	0	n.a.
TGME49_216020	peptidase family c78 protein	0	n.a.
TGME49_216810	5'-nucleotidase, C-terminal domain-containing protein	0	n.a.
TGME49_216860	DEAD (Asp-Glu-Ala-Asp) box polypeptide DDX39	0	n.a.
TGME49_217570	ribosomal protein RPS27	0	n.a.
TGME49_220270	alveolin domain containing intermediate filament IMC6	0	n.a.
TGME49_220360	FAD binding domain-containing protein	0	n.a.
TGME49_220860	DEAD/DEAH box helicase	0	n.a.
TGME49_222140	DEAD/DEAH box helicase domain-containing protein	0	n.a.
TGME49_222270	hypothetical protein	0	n.a.
TGME49_222960	SCY kinase-related protein (incomplete catalytic triad)	0	n.a.
TGME49_223410	eukaryotic initiation factor-4E, putative	0	n.a.
TGME49_223970	translation elongation and release factors (gtpases), putative	0	n.a.
TGME49_224060	thioredoxin, putative	0	n.a.
TGME49_225310	ARF1-directed GTPase-activating protein, putative	0	n.a.
TGME49_225800	iron-sulfur assembly ATPase	0	n.a.
TGME49_226250	DEAD (Asp-Glu-Ala-Asp) box polypeptide DDX3X	0	n.a.
TGME49_227360	ribosomal protein RPL3	0	n.a.
TGME49_229930	p25-alpha family protein	0	n.a.
TGME49_230400	hypothetical protein	0	n.a.
TGME49_230410	peroxiredoxin PRX3	0	n.a.
TGME49_231210	sarcalumenin/eps15 family protein	0	n.a.
TGME49_231630	alveolin domain containing intermediate filament IMC4	0	n.a.
TGME49_233720	DNA-directed RNA polymerase II RPBABC8	0	n.a.
TGME49_233905	histone kinase SNF1, putative	0	n.a.
TGME49_234280	AMP deaminase	0	n.a.
TGME49_236110	autophagy-related protein 3 atg3, putative	0	n.a.
TGME49_237010	hypothetical protein	0	n.a.
TGME49_237560	iron-sulfur cluster protein ISCU	0	n.a.
TGME49_237870	FYVE zinc finger domain-containing protein	0	n.a.
TGME49_238140	hypothetical protein	0	n.a.
TGME49_238190	DNA-directed RNA polymerase II RPB3	0	n.a.
TGME49_238400	endonuclease/exonuclease/phosphatase domain-containing protein	0	n.a.
TGME49_239100	ribosomal protein RPS7	0	n.a.
TGME49_239330	ribosomal protein RPL37	0	n.a.
TGME49_240650	coatomer protein complex, subunit alpha, putative	0	n.a.
TGME49_243950	prohibitin, putative	0	n.a.
TGME49_244320	ribosomal protein RPL24	0	n.a.
TGME49_248390	ribosomal protein RPL26	0	n.a.
TGME49_249180	bifunctional dihydrofolate reductase-thymidylate synthase	0	n.a.
TGME49_249970	hypothetical protein	0	n.a.
TGME49_251780	heat shock protein	0	n.a.
TGME49_255880	hypothetical protein	0	n.a.
TGME49_256920	phosphatidylinositol-4-phosphate 5-Kinase	0	n.a.
TGME49_257170	hypothetical protein	0	n.a.
TGME49_257350	eukaryotic translation initiation factor, putative	0	n.a.
TGME49_259660	orotate phosphoribosyltransferase	0	n.a.
TGME49_260170	elongation factor EF-G, putative	0	n.a.
TGME49_261500	hydrolase	0	n.a.
TGME49_261570	ribosomal protein RPL7A	0	n.a.
TGME49_261710	ankyrin repeat-containing protein	0	n.a.
TGME49_262450	hypothetical protein	0	n.a.
TGME49_262560	hypothetical protein	0	n.a.
TGME49_262730	rhoptry protein ROP16	0	n.a.
TGME49_263070	CMGC kinase, CK2 family	0	n.a.
TGME49_263700	ribosomal protein RPS14	0	n.a.
TGME49_264900	hypothetical protein	0	n.a.
TGME49_266760	isocitrate dehydrogenase	0	n.a.
TGME49_267050	hydrolase, alpha/beta fold family protein	0	n.a.
TGME49_267280	hypothetical protein	0	n.a.
TGME49_267650	hypothetical protein	0	n.a.
TGME49_268890	citrate synthase I	0	n.a.
TGME49_271050	SAG-related sequence SRS34A	0	n.a.
TGME49_272290	pyruvate dehydrogenase complex subunit PD-HE1Beta	0	n.a.
TGME49_273960	chaperonin GroS protein	0	n.a.
TGME49_277000	transport protein Sec24, putative	0	n.a.
TGME49_280610	signal recognition particle receptor alpha subunit	0	n.a.
TGME49_283830	type I inorganic pyrophosphatase PPase	0	n.a.
TGME49_287500	T complex chaperonin, putative	0	n.a.
TGME49_288500	FAD Malate-dehydrogenase (MDH-FAD)	0	n.a.
TGME49_289080	HEAT repeat-containing protein	0	n.a.
TGME49_289190	tetratricopeptide repeat-containing protein	0	n.a.
TGME49_289650	PEP-carboxykinase I	0	n.a.
TGME49_289680	Ras-related protein Rab11	0	n.a.
TGME49_289970	hypothetical protein	0	n.a.
TGME49_290200	NAD/NADP octopine/nopaline dehydrogenase, alpha-helical domain-containing protein	0	n.a.
TGME49_291950	RNA recognition motif-containing protein	0	n.a.
TGME49_292080	leucyl-tRNA synthetase	0	n.a.
TGME49_292920	heat shock protein 75, putative	0	n.a.
TGME49_293250	hypothetical protein	0	n.a.
TGME49_294740	hypothetical protein	0	n.a.
TGME49_297940	single-strand binding protein	0	n.a.
TGME49_299050	ribosomal protein RPL17	0	n.a.
TGME49_300140	elongation factor 1-gamma, putative	0	n.a.
TGME49_301380	elongation factor Tu GTP binding domain-containing protein	0	n.a.
TGME49_301440	calcium-dependent protein kinase CDPK1	0	n.a.
TGME49_304710	eukaryotic peptide chain release factor, putative	0	n.a.
TGME49_305160	histone H2Ba	0	n.a.
TGME49_305520	ribosomal protein RPS2	0	n.a.
TGME49_305540	hypothetical protein	0	n.a.
TGME49_305980	pyruvate dehydrogenase complex subunit PDH-E3I	0	n.a.
TGME49_306030	glutathione s-transferase, n-terminal domain containing protein	0	n.a.
TGME49_307570	glycerol-3-phosphate dehydrogenase (gpdh), putative	0	n.a.
TGME49_309370	adaptin n terminal region domain-containing protein	0	n.a.
TGME49_309600	hypothetical protein	0	n.a.
TGME49_309820	ribosomal protein RPL11	0	n.a.
TGME49_310150	AMP-binding enzyme domain-containing protein	0	n.a.
TGME49_310190	PIK3R4 kinase-related protein (incomplete catalytic triad)	0	n.a.
TGME49_310220	hypothetical protein	0	n.a.
TGME49_310802	CRAL/TRIO domain-containing protein	0	n.a.
TGME49_311400	WD domain, G-beta repeat-containing protein	0	n.a.
TGME49_313100	signal recognition particle SRP54 protein	0	n.a.
TGME49_313390	ribosomal protein RPL6	0	n.a.
TGME49_314100	tetratricopeptide repeat-containing protein	0	n.a.
TGME49_315080	hypothetical protein	0	n.a.
TGME49_315310	hypothetical protein	0	n.a.
TGME49_316330	superoxide dismutase SOD2	0	n.a.
TGME49_320050	ribosomal protein RPL5	0	n.a.
TGME49_321620	dynamin-related protein DRPB	0	n.a.

## Sheet: Supplementary 2e
Supplementary file 2e. Merged candidate list from three datasets of hyperLOPIT, ACP-BirA and APT1-TurboID
No	Gene Number	Annotation (ToxoDB)	TMD numbers	Sources of the datasets	Screen Reasons (ortholog in P. falciparum)	Temporary Names
1	TGME49_309580	transporter, major facilitator family protein	8	HyperLOPIT (pmid:33053376); APT1-TurboID	TMD≥6	HAP1
2	TGME49_267690	hypothetical protein	6	HyperLOPIT (pmid: 33053376); APT1-TurboID	TMD≥6	HAP2
3	TGME49_233540	transporter, major facilitator family protein	11	ACP-BirA (pmid: 30212465); APT1-TurboID	TMD≥6	HAP3
4	TGME49_297245	transporter, major facilitator family protein	11	ACP-BirA (pmid: 30212465); APT1-TurboID	TMD≥6	HAP4
5	TGME49_222310	hypothetical protein	7	ACP-BirA (pmid: 30212465);	PF3D7_0908300 (7; TMD≥6)	HAP5
6	TGME49_249820	ATP-binding cassette sub-family B member 5	4	ACP-BirA (pmid: 30212465);	PF3D7_0302600 (6; TMD≥6)	HAP6
7	TGME49_260310	ATP-binding cassette transporter ABC.B1	7	ACP-BirA (pmid: 30212465);	PF3D7_1145500 (6; TMD≥6)	HAP7
8	TGME49_263740	ABC transporter transmembrane region domain-containing protein	5	ACP-BirA (pmid: 30212465);	transporter	HAP8
9	TGME49_226790	ABC transporter, ATP-binding domain-containing protein	0	ACP-BirA (pmid: 30212465);	transporter	HAP9
10	TGME49_208050	ABC transporter, putative	7	APT1-TurboID	TMD≥6	HAP34
11	TGME49_254580	UDP-galactose transporter family protein	8	APT1-TurboID	TMD≥6	HAP30
12	TGME49_311080	transporter, cation channel family protein	10	APT1-TurboID	TMD≥6	HAP18
13	TGME49_226020	transporter, major facilitator family protein	12	APT1-TurboID	TMD≥6	HAP12
14	TGME49_319740	transporter, major facilitator family protein	7	APT1-TurboID	TMD≥6	HAP39
15	TGME49_320020	transporter, major facilitator family protein	12	APT1-TurboID	TMD≥6	HAP13
16	TGME49_216820	transporter, major facilitator family protein	11	APT1-TurboID	TMD≥6	HAP17
17	TGME49_215940	Acetyl-coenzyme A transporter, putative	9	APT1-TurboID	TMD≥6	HAP28
18	TGME49_209940	transporter/permease protein	8	APT1-TurboID	TMD≥6	HAP33
19	TGME49_266750	transporter/permease protein, putative	7	APT1-TurboID	TMD≥6	HAP41
20	TGME49_278660	P-type ATPase4, putative	8	APT1-TurboID	TMD≥6	HAP31
21	TGME49_230420	sarco/endoplasmic reticulum Ca2+-ATPase	7	APT1-TurboID	TMD≥6	HAP35
22	TGME49_313020	STAS domain-containing protein	8	APT1-TurboID	TMD≥6	HAP32
23	TGME49_289070	E1-E2 ATPase subfamily protein	11	APT1-TurboID	TMD≥6	HAP15
24	TGME49_263690	hypothetical protein	10	APT1-TurboID	TMD≥6	HAP24
25	TGME49_249580	hypothetical protein	10	APT1-TurboID	TMD≥6	HAP22
26	TGME49_238390	hypothetical protein	10	APT1-TurboID	TMD≥6	HAP19
27	TGME49_291940	hypothetical protein	8	APT1-TurboID	TMD≥6	HAP29
28	TGME49_316260	hypothetical protein	7	APT1-TurboID	TMD≥6	HAP40
29	TGME49_304750	zinc finger, C3HC4 type (RING finger) domain-containing protein	7	APT1-TurboID	TMD≥6	HAP36
30	TGME49_321590	hypothetical protein	6	APT1-TurboID	TMD≥6	HAP46
31	TGME49_262660	hypothetical protein	12	APT1-TurboID	TMD≥6	HAP11
32	TGME49_264870	Sodium:neurotransmitter symporter family protein	14	APT1-TurboID	TMD≥6	HAP10
33	TGME49_280400	hypothetical protein	12	APT1-TurboID	TMD≥6	HAP14
34	TGME49_252340	hypothetical protein	11	APT1-TurboID	TMD≥6	HAP16
35	TGME49_312622	DUF803 domain-containing protein	10	APT1-TurboID	TMD≥6	HAP20
36	TGME49_283730	endomembrane protein 70 subfamily protein	10	APT1-TurboID	TMD≥6	HAP21
37	TGME49_270200	hypothetical protein	10	APT1-TurboID	TMD≥6	HAP23
38	TGME49_261430	hypothetical protein	9	APT1-TurboID	TMD≥6	HAP25
39	TGME49_223600	hypothetical protein	9	APT1-TurboID	TMD≥6	HAP26
40	TGME49_310140	hypothetical protein	9	APT1-TurboID	TMD≥6	HAP27
41	TGME49_270220	hypothetical protein	7	APT1-TurboID	TMD≥6	HAP37
42	TGME49_262610	hypothetical protein	7	APT1-TurboID	TMD≥6	HAP38
43	TGME49_233760	hypothetical protein	7	APT1-TurboID	TMD≥6	HAP42
44	TGME49_307860	hypothetical protein	7	APT1-TurboID	TMD≥6	HAP43
45	TGME49_281640	hypothetical protein	7	APT1-TurboID	TMD≥6	HAP44
46	TGME49_210380	hypothetical protein	6	APT1-TurboID	TMD≥6	HAP45
47	TGME49_319550	membrane protein C17G8.08c, putative	6	APT1-TurboID	TMD≥6	HAP47
48	TGME49_278960	hypothetical protein	6	APT1-TurboID	TMD≥6	HAP48
49	TGME49_208560	carrier superfamily protein	1	APT1-TurboID	carrier (6>TMD≥2)	HAP49
50	TGME49_278990	phosphate carrier, putative	1	APT1-TurboID	carrier (6>TMD≥2)	HAP50

## Sheet: Supplementary file 2f
Supplementary file 2f. Bioinformatic analysis of discovered transmembrane proteins in this study
Accession ID	Names used in this study	CRISPR fitness scores	Experimental results	Predicted Location (TAGM-MAP)	TMD numbers	Product Description in ToxoDB	ortholog in P. falciparum (E-value)	Product Description in PlasmoDB	Fitness scores
TGME49_208050	HAP34	-2.31	Apicoplast	N/A	7	ABC transporter, putative	PF3D7_1447900 (1.74E-10)	multidrug resistance protein 2	-2.868
TGME49_309580	HAP1	-4.04	Apicoplast	apicoplast	8	transporter, major facilitator family protein	PF3D7_1104800 8.82E-72	metabolite/drug transporter, putative	-2.767
TGME49_297245	AMT2 （HAP4)	-5.71	Apicoplast	PM - integral	11	transporter, major facilitator family protein	PF3D7_0210300 (2.02E-42)	monocarboxylate transporter, putative	-2.961
TGME49_311080	HAP18	-4.44	Apicoplast	N/A	10		n/a	n/a	n/a
TGME49_233540	AMT1 (HAP3）	-4.02	Apicoplast	PM - integral	11	transporter, major facilitator family protein	PF3D7_0210300 (1.67E-46)	monocarboxylate transporter, putative	-2.961
TGME49_215940	HAP28	0.94	Apicoplast	ER	9	transporter/permease protein	PF3D7_1036800 (1.69E-100)	acetyl-CoA transporter, putative	-2.771
TGME49_209940	HAP33	-0.07	Apicoplast	N/A	8	Acetyl-coenzyme A transporter, putative	PF3D7_0716900 (7.35E-71)	drug/metabolite transporter DMT2	-3.195
TGME49_266750	HAP41	-1.01	Apicoplast	PM - integral	7	transporter/permease protein, putative	PF3D7_0716900 (1.4E-96)	drug/metabolite transporter DMT2	-3.195
TGME49_226790	HAP9	-4.76	Apicoplast	N/A	0	ABC transporter, ATP-binding domain-containing protein	PF3D7_1121700 (8.54E-12)	protein GCN20	-1.396
TGME49_291940	HAP29	0.18	Apicoplast	PM - integral	8	hypothetical protein	n/a	n/a	n/a
TGME49_304750	HAP36	0.33	Apicoplast	N/A	7	zinc finger, C3HC4 type (RING finger) domain-containing protein	n/a	n/a	n/a
TGME49_321590	HAP46	0.62	Apicoplast	PM - integral	6	hypothetical protein	n/a	n/a	n/a
TGME49_262660	HAP11	-0.2	Apicoplast	PM - integral	12	hypothetical protein	n/a	n/a	n/a
TGME49_264870	HAP10	0.81	Apicoplast	PM - integral	11	Sodium:neurotransmitter symporter family protein	PF3D7_0209600 (2E-17)	transporter, putative	-2.867
TGME49_278990	HAP50	-2.72	Apicoplast	mitochondrion - membranes	1	phosphate carrier, putative	PF3D7_1202200 (1E-150)	mitochondrial phosphate carrier protein	-2.302
