# Supplementary material for: The Toxoplasma monocarboxylate transporters are involved in the metabolism within the apicoplast and are linked to parasite survival
Source: eLife. 2024 Mar 19;12:RP88866. doi: 10.7554/eLife.88866 (PMC10950331; doi:10.7554/eLife.88866)
Supplement: Supplementary file 3. — (a) Identification of orthologs of novel apicoplast proteins and known proteins in chromalveolates, red algae, green algae, plants, fungi, metazoa, and bacteria. (b) Orthologs of AMT1 and AMT2 in selected species of apicomplexans. [file elife-88866-supp3.xlsx]

## Sheet: Supplementary 3a
Supplementary 3a. Identification of orthologues of novel apicoplast proteins and known proteins in chromalveolates, red algae, green algae, plants, fungi, metazoa and bacteria
		T.gondii ME49 gene	TGME49_297245	TGME49_233540	TGME49_208050	TGME49_309580	TGME49_311080	TGME49_215940	TGME49_209940	TGME49_266750	TGME49_226790	TGME49_291940	TGME49_304750	TGME49_321590	TGME49_262660	TGME49_264870	TGME49_278990	TGME49_261070	TGME49_264080	TGME49_226400	TGME49_286050	TGME49_221330	TGME49_227420
		Name	AMT2	AMT1	HAP34	HAP1	HAP18	HAP28	HAP33	HAP41	HAP9	HAP29	HAP36	HAP46	HAP11	HAP10	HAP50	APT1	ACP	LipA	TIC22	TgGyrA	LytB
Level1	Level2	Species	AMT2	AMT1	HAP34	HAP1	HAP18	HAP28	HAP33	HAP41	HAP9	HAP29	HAP36	HAP46	HAP11	HAP10	HAP50	APT	ACP	LipA	TIC22	TgGyrA	LytB
Ciliophora	Ciliophora	Cryptocaryon irritans	NA	NA_x000D_	NA_x000D_	NA_x000D_	NA_x000D_	NA_x000D_	NA_x000D_	NA_x000D_	NA_x000D_	NA_x000D_	NA_x000D_	NA_x000D_	NA_x000D_	NA_x000D_	(AGA16550.1)_x000D_ 2.8E-41	NA_x000D_	NA_x000D_	NA_x000D_	NA_x000D_	NA_x000D_	NA_x000D_
Ciliophora	Ciliophora	Stentor coeruleus	(OMJ69015.1)_x000D_ 8.8E-98	(OMJ89822.1)_x000D_ 6E-36	(OMJ75317.1)_x000D_ 7E-24	NA_x000D_	OMJ94175.1_x000D_ 3.3E-86	(OMJ78339.1)_x000D_ 9E-34	NA_x000D_	NA_x000D_	(OMJ95296.1)_x000D_ 8E-12	NA_x000D_	(OMJ83770.1)_x000D_ 7E-08	NA_x000D_	NA_x000D_	NA_x000D_	(OMJ92695.1)_x000D_ 6E-98	NA_x000D_	(OMJ90053.1)_x000D_ 1E-23	NA_x000D_	NA_x000D_	OMJ76839.1_x000D_ 5.8E-80	NA_x000D_
Ciliophora	Ciliophora	Ichthyophthirius multifiliis	(XP_004036611.1)_x000D_ 2.8E-90	(XP_004036611.1)_x000D_ 4E-21	(XP_004040121.1)_x000D_ 6E-22	NA_x000D_	XP_004037277.1_x000D_ 7.6E-85	(XP_004030892.1)_x000D_ 6E-15	NA_x000D_	NA_x000D_	(XP_004036516.1)_x000D_ 1E-12	NA_x000D_	(XP_004032165.1)_x000D_ 1.4E-17	NA_x000D_	NA_x000D_	(XP_004030948.1)_x000D_ 2.5E-92	(XP_004029862.1)_x000D_ 2E-105	NA_x000D_	(XP_004037427.1)_x000D_ 3.9E-09	NA_x000D_	NA_x000D_	XP_004035447.1_x000D_ 1.7E-84	NA_x000D_
Ciliophora	Ciliophora	Paramecium octaurelia	(CAD8183188.1)_x000D_ 2.1E-144	(CAD8170833.1)_x000D_ 4E-24	(CAD8209108.1)_x000D_ 9E-25	NA_x000D_	CAD8170930.1_x000D_ 4.7E-101	(CAD8132697.1)_x000D_ 6E-14	NA_x000D_	NA_x000D_	(CAD8196960.1)_x000D_ 7E-13	NA_x000D_	(CAD8177612.1)_x000D_ 2E-09	NA_x000D_	NA_x000D_	(CAD8136823.1)_x000D_ 3.2E-199	(CAD8192444.1)_x000D_ 3E-111	NA_x000D_	(CAD8153664.1)_x000D_ 9.8E-28	NA_x000D_	NA_x000D_	CAD8154049.1_x000D_ 3E-85	NA_x000D_
Ciliophora	Ciliophora	Paramecium pentaurelia	(CAD8184418.1)_x000D_ 2.1E-143	(CAD8180554.1)_x000D_ 5E-28	(CAD8204488.1)_x000D_ 2E-22	NA_x000D_	CAD8180436.1_x000D_ 1E-84	(CAD8140098.1)_x000D_ 3E-14	NA_x000D_	NA_x000D_	(CAD8196757.1)_x000D_ 6E-13	NA_x000D_	(CAD8206860.1)_x000D_ 2E-09	NA_x000D_	NA_x000D_	(CAD8141285.1)_x000D_ 6.3E-199	(CAD8194166.1)_x000D_ 6E-114	NA_x000D_	(CAD8156884.1)_x000D_ 1.8E-27	NA_x000D_	NA_x000D_	CAD8174174.1_x000D_ 1.1E-85	NA_x000D_
Ciliophora	Ciliophora	Paramecium primaurelia	(CAD8078962.1)_x000D_ 2.9E-143	(CAD8077098.1)_x000D_ 5E-28	(CAD8105461.1)_x000D_ 2E-22	NA_x000D_	CAD8107601.1_x000D_ 9.5E-92	(CAD8044505.1)_x000D_ 1E-18	NA_x000D_	NA_x000D_	(CAD8092372.1)_x000D_ 6E-13	NA_x000D_	(CAD8106652.1)_x000D_ 1E-09	NA_x000D_	NA_x000D_	(CAD8047664.1)_x000D_ 1.1E-198	(CAD8095604.1)_x000D_ 5E-114	NA_x000D_	(CAD8045253.1)_x000D_ 1.8E-27	NA_x000D_	NA_x000D_	CAD8072807.1_x000D_ 1.4E-85	NA_x000D_
Ciliophora	Ciliophora	Paramecium sonneborni	(CAD8092769.1)_x000D_ 2.1E-141	(CAD8090387.1)_x000D_ 1E-28	(CAD8125126.1)_x000D_ 4E-23	NA_x000D_	CAD8085427.1_x000D_ 2.9E-84	(CAD8053644.1)_x000D_ 1E-14	NA_x000D_	NA_x000D_	(CAD8118659.1)_x000D_ 6E-13	NA_x000D_	(CAD8100434.1)_x000D_ 1E-10	NA_x000D_	NA_x000D_	(CAD8059026.1)_x000D_ 2.1E-194	(CAD8117840.1)_x000D_ 3E-112	NA_x000D_	(CAD8065284.1)_x000D_ 1.4E-27	NA_x000D_	NA_x000D_	CAD8065951.1_x000D_ 1.7E-85	NA_x000D_
Ciliophora	Ciliophora	Paramecium tetraurelia	NA_x000D_	NA_x000D_	NA_x000D_	NA_x000D_	NA_x000D_	NA_x000D_	NA_x000D_	NA_x000D_	NA_x000D_	NA_x000D_	(CAD97737.1)_x000D_ 1.5E-09	NA_x000D_	NA_x000D_	NA_x000D_	NA_x000D_	NA_x000D_	NA_x000D_	NA_x000D_	NA_x000D_	NA_x000D_	NA_x000D_
Ciliophora	Ciliophora	Paramecium tetraurelia strain d4-2	(XP_001450456.1)_x000D_ 3.7E-143	(XP_001436594.1)_x000D_ 1E-24	(XP_001459746.1)_x000D_ 7E-25	NA_x000D_	XP_001432429.1_x000D_ 1.5E-84	(XP_001442371.1)_x000D_ 2E-19	NA_x000D_	NA_x000D_	(XP_001460230.1)_x000D_ 1E-12	NA_x000D_	(XP_001430725.1)_x000D_ 1E-10	NA_x000D_	NA_x000D_	(XP_001455797.1)_x000D_ 3.1E-199	(XP_001427305.1)_x000D_ 1E-112	NA_x000D_	(XP_001458907.1)_x000D_ 6.4E-28	NA_x000D_	NA_x000D_	XP_001447032.1_x000D_ 1.4E-85	NA_x000D_
Ciliophora	Ciliophora	Philasterides dicentrarchi	NA_x000D_	NA_x000D_	(QBH22567.1)_x000D_ 8.1E-32	NA_x000D_	NA_x000D_	NA_x000D_	NA_x000D_	NA_x000D_	(QBH22567.1)_x000D_ 1.2E-33	NA_x000D_	NA_x000D_	NA_x000D_	NA_x000D_	NA_x000D_	NA_x000D_	NA_x000D_	NA_x000D_	NA_x000D_	NA_x000D_	NA_x000D_	NA_x000D_
Ciliophora	Ciliophora	Pseudocohnilembus persalinus	(KRX09190.1)_x000D_ 9.5E-74	(KRX09190.1)_x000D_ 1E-16	(KRX06387.1)_x000D_ 2E-24	NA_x000D_	KRX08852.1_x000D_ 1.9E-81	(KRW99416.1)_x000D_ 3E-22	NA_x000D_	NA_x000D_	(KRX05641.1)_x000D_ 7E-12	NA_x000D_	(KRX10289.1)_x000D_ 6E-08	NA_x000D_	NA_x000D_	(KRW98849.1)_x000D_ 1.3E-167	(KRX03772.1)_x000D_ 1E-62	NA_x000D_	(KRX03329.1)_x000D_ 4.3E-23	NA_x000D_	NA_x000D_	KRX00442.1_x000D_ 2E-77	NA_x000D_
Ciliophora	Ciliophora	Tetrahymena pyriformis	NA_x000D_	NA_x000D_	(CAD55936.2)_x000D_ 3.1E-123	NA_x000D_	NA_x000D_	NA_x000D_	NA_x000D_	NA_x000D_	(CAD55936.2)_x000D_ 1.4E-75	NA_x000D_	NA_x000D_	NA_x000D_	NA_x000D_	NA_x000D_	NA_x000D_	NA_x000D_	NA_x000D_	NA_x000D_	NA_x000D_	NA_x000D_	NA_x000D_
Ciliophora	Ciliophora	Tetrahymena thermophila	NA_x000D_	NA_x000D_	NA_x000D_	NA_x000D_	NA_x000D_	NA_x000D_	NA_x000D_	NA_x000D_	NA_x000D_	NA_x000D_	NA_x000D_	NA_x000D_	NA_x000D_	NA_x000D_	(ACP74151.1)_x000D_ 1.1E-41	NA_x000D_	NA_x000D_	NA_x000D_	NA_x000D_	AAS90119.1_x000D_ 2E-11	NA_x000D_
Ciliophora	Ciliophora	Tetrahymena thermophila SB210	(XP_001023757.1)_x000D_ 9.2E-94	(XP_001016223.2)_x000D_ 2E-23	(XP_001017860.2)_x000D_ 4E-24	NA_x000D_	XP_001015429.2_x000D_ 1.1E-81	(XP_001007496.1)_x000D_ 2E-18	NA_x000D_	NA_x000D_	(XP_001030808.1)_x000D_ 8E-15	NA_x000D_	(XP_001020372.2)_x000D_ 1E-09	NA_x000D_	NA_x000D_	(XP_001027807.1)_x000D_ 4.2E-179	(XP_001023482.1)_x000D_ 7E-101	NA_x000D_	(XP_001470926.1)_x000D_ 5.2E-25	NA_x000D_	NA_x000D_	XP_001031412.1_x000D_ 3E-12	NA_x000D_
Ciliophora	Ciliophora	Euplotes sp.	NA_x000D_	NA_x000D_	NA_x000D_	NA_x000D_	NA_x000D_	NA_x000D_	NA_x000D_	NA_x000D_	NA_x000D_	NA_x000D_	NA_x000D_	NA_x000D_	NA_x000D_	NA_x000D_	(AAM97613.1)_x000D_ 7E-43	NA_x000D_	NA_x000D_	NA_x000D_	NA_x000D_	NA_x000D_	NA_x000D_
Ciliophora	Ciliophora	Halteria grandinella	(TNV81075.1)_x000D_ 4.4E-72	(TNV81075.1)_x000D_ 8.3E-116	(TNV86879.1)_x000D_ 2E-22	NA_x000D_	TNV88158.1_x000D_ 9.2E-83	(TNV84327.1)_x000D_ 3E-29	NA_x000D_	NA_x000D_	(TNV82485.1)_x000D_ 1E-11	NA_x000D_	(TNV70833.1)_x000D_ 6.7E-14	NA_x000D_	NA_x000D_	NA_x000D_	(TNV79962.1)_x000D_ 2E-92	NA_x000D_	NA_x000D_	NA_x000D_	NA_x000D_	NA_x000D_	NA_x000D_
Ciliophora	Ciliophora	Moneuplotes crassus	NA_x000D_	NA_x000D_	(AOQ25831.1)_x000D_ 2E-23	NA_x000D_	NA_x000D_	NA_x000D_	NA_x000D_	NA_x000D_	(AOQ25828.1)_x000D_ 7.7E-72	NA_x000D_	NA_x000D_	NA_x000D_	NA_x000D_	NA_x000D_	NA_x000D_	NA_x000D_	NA_x000D_	NA_x000D_	NA_x000D_	NA_x000D_	NA_x000D_
Ciliophora	Ciliophora	Oxytricha fallax	NA_x000D_	NA_x000D_	NA_x000D_	NA_x000D_	NA_x000D_	NA_x000D_	NA_x000D_	NA_x000D_	NA_x000D_	NA_x000D_	NA_x000D_	NA_x000D_	NA_x000D_	NA_x000D_	(AAB61765.1)_x000D_ 2E-51	NA_x000D_	NA_x000D_	NA_x000D_	NA_x000D_	NA_x000D_	NA_x000D_
Ciliophora	Ciliophora	Oxytricha trifallax	NA_x000D_	NA_x000D_	NA_x000D_	NA_x000D_	NA_x000D_	NA_x000D_	NA_x000D_	NA_x000D_	NA_x000D_	NA_x000D_	NA_x000D_	NA_x000D_	NA_x000D_	NA_x000D_	(AAB19207.1)_x000D_ 3.8E-40	NA_x000D_	NA_x000D_	NA_x000D_	NA_x000D_	NA_x000D_	NA_x000D_
Ciliophora	Ciliophora	Sterkiella histriomuscorum	NA_x000D_	NA_x000D_	(AAK19598.2)_x000D_ 4.2E-125	NA_x000D_	NA_x000D_	NA_x000D_	NA_x000D_	NA_x000D_	(AAK19598.2)_x000D_ 3E-75	NA_x000D_	NA_x000D_	NA_x000D_	NA_x000D_	NA_x000D_	(Q27151.1)_x000D_ 2E-24	NA_x000D_	NA_x000D_	NA_x000D_	NA_x000D_	NA_x000D_	NA_x000D_
Ciliophora	Ciliophora	Stylonychia lemnae	(CDW83396.1)_x000D_ 8.9E-86	(CDW78984.1)_x000D_ 5E-23	(CDW87468.1)_x000D_ 3E-23	NA_x000D_	CDW78731.1_x000D_ 1.2E-88	(CDW76460.1)_x000D_ 4E-23	NA_x000D_	NA_x000D_	(CDW90593.1)_x000D_ 4E-11	NA_x000D_	(CDW74700.1)_x000D_ 2.2E-15	NA_x000D_	NA_x000D_	NA_x000D_	(CDW71392.1)_x000D_ 1E-94	NA_x000D_	(CDW83354.1)_x000D_ 2E-25	NA_x000D_	NA_x000D_	CDW84992.1_x000D_ 1.6E-77	NA_x000D_
Ciliophora	Ciliophora	Nyctotherus ovalis	NA_x000D_	NA_x000D_	NA_x000D_	NA_x000D_	NA_x000D_	NA_x000D_	NA_x000D_	NA_x000D_	NA_x000D_	NA_x000D_	NA_x000D_	NA_x000D_	NA_x000D_	NA_x000D_	(AAM97610.1)_x000D_ 9.7E-53	NA_x000D_	NA_x000D_	NA_x000D_	NA_x000D_	NA_x000D_	NA_x000D_
Cryptophyta	Cryptophyta	Chroomonas debatzensis	NA_x000D_	NA_x000D_	(BDA98846.1)_x000D_ 2E-21	NA_x000D_	NA_x000D_	NA_x000D_	NA_x000D_	NA_x000D_	(BDA98846.1)_x000D_ 8.9E-30	NA_x000D_	NA_x000D_	NA_x000D_	NA_x000D_	NA_x000D_	NA_x000D_	NA_x000D_	(BDA98881.1)_x000D_ 3E-20	NA_x000D_	(BDA98821.1)_x000D_ 2.9E-51	NA_x000D_	NA_x000D_
Cryptophyta	Cryptophyta	Cryptomonas curvata	NA_x000D_	NA_x000D_	(YP_009420284.1)_x000D_ 4.1E-19	NA_x000D_	NA_x000D_	NA_x000D_	NA_x000D_	NA_x000D_	(BBK20435.1)_x000D_ 1.6E-30	NA_x000D_	NA_x000D_	NA_x000D_	NA_x000D_	NA_x000D_	NA_x000D_	NA_x000D_	(BDA97330.1)_x000D_ 8E-20	NA_x000D_	(BBK20410.1)_x000D_ 1.9E-23	NA_x000D_	NA_x000D_
Cryptophyta	Cryptophyta	Cryptomonas paramecium	NA_x000D_	NA_x000D_	(XP_003239985.1)_x000D_ 3.7E-17	NA_x000D_	NA_x000D_	NA_x000D_	NA_x000D_	NA_x000D_	(XP_003239985.1)_x000D_ 7.7E-32	NA_x000D_	NA_x000D_	NA_x000D_	NA_x000D_	NA_x000D_	NA_x000D_	NA_x000D_	(YP_003359248.1)_x000D_ 9E-20	NA_x000D_	(YP_003359219.1)_x000D_ 2.8E-08	NA_x000D_	NA_x000D_
Cryptophyta	Cryptophyta	Cryptomonas sp. CCAC 1634B	NA_x000D_	NA_x000D_	(BBK20519.1)_x000D_ 4.4E-19	NA_x000D_	NA_x000D_	NA_x000D_	NA_x000D_	NA_x000D_	(BBK20519.1)_x000D_ 1.2E-28	NA_x000D_	NA_x000D_	NA_x000D_	NA_x000D_	NA_x000D_	NA_x000D_	NA_x000D_	(BBK20457.1)_x000D_ 4E-20	NA_x000D_	(BBK20515.1)_x000D_ 2.3E-20	NA_x000D_	NA_x000D_
Cryptophyta	Cryptophyta	Cryptomonas sp. SAG 977-2f	NA_x000D_	NA_x000D_	(BBK20610.1)_x000D_ 2.3E-21	NA_x000D_	NA_x000D_	NA_x000D_	NA_x000D_	NA_x000D_	(BBK20610.1)_x000D_ 5.6E-30	NA_x000D_	NA_x000D_	NA_x000D_	NA_x000D_	NA_x000D_	NA_x000D_	NA_x000D_	(BBK20543.1)_x000D_ 1E-20	NA_x000D_	(BBK20605.1)_x000D_ 3.5E-24	NA_x000D_	NA_x000D_
Cryptophyta	Cryptophyta	Guillardia theta	NA_x000D_	NA_x000D_	(ALG63565.1)_x000D_ 9.1E-20	NA_x000D_	NA_x000D_	NA_x000D_	NA_x000D_	NA_x000D_	(ALG63565.1)_x000D_ 2.2E-30	NA_x000D_	NA_x000D_	NA_x000D_	NA_x000D_	NA_x000D_	NA_x000D_	(ABD51933.1)_x000D_ 2E-38	(NP_050766.1)_x000D_ 2E-20	NA_x000D_	(XP_001713539.1)_x000D_ 2.3E-52	XP_001713528.1_x000D_ 8E-107	NA_x000D_
Cryptophyta	Cryptophyta	Guillardia theta CCMP2712	NA_x000D_	NA_x000D_	XP_005830692.1_x000D_ 4E-24	(XP_005825838.1)_x000D_ 4E-34	XP_005834581.1_x000D_ 9.5E-78	(XP_005830622.1)_x000D_ 2E-51	(XP_005833416.1)_x000D_ 4E-30	(XP_005833416.1)_x000D_ 5E-34	(XP_005823064.1)_x000D_ 2.7E-109	NA_x000D_	(XP_005832572.1)_x000D_ 2.5E-20	NA_x000D_	NA_x000D_	(XP_005827924.1)_x000D_ 4E-25	(XP_005842015.1)_x000D_ 1E-61	(XP_005830175.1)_x000D_ 9E-71	(XP_005830145.1)_x000D_ 7E-18	(XP_005841279.1)_x000D_ 2E-130	NA_x000D_	XP_005825667.1_x000D_ 8.1E-70	(XP_005834226.1)_x000D_ 1.8E-115
Cryptophyta	Cryptophyta	Hemiselmis andersenii	NA_x000D_	NA_x000D_	(XP_001712463.1)_x000D_ 5.9E-21	NA_x000D_	NA_x000D_	NA_x000D_	NA_x000D_	NA_x000D_	(XP_001712463.1)_x000D_ 4E-42	NA_x000D_	NA_x000D_	NA_x000D_	NA_x000D_	NA_x000D_	NA_x000D_	NA_x000D_	(BDA99177.1)_x000D_ 1E-20	NA_x000D_	(XP_001712614.1)_x000D_ 1.3E-52	XP_001712376.1_x000D_ 2E-114	NA_x000D_
Cryptophyta	Cryptophyta	Proteomonas sp. NIES-1005	NA_x000D_	NA_x000D_	(BDA98110.1)_x000D_ 7E-20	NA_x000D_	NA_x000D_	NA_x000D_	NA_x000D_	NA_x000D_	(BDA98110.1)_x000D_ 6.3E-31	NA_x000D_	NA_x000D_	NA_x000D_	NA_x000D_	NA_x000D_	NA_x000D_	NA_x000D_	(BDA98145.1)_x000D_ 3E-21	NA_x000D_	(BDA98085.1)_x000D_ 7.3E-23	NA_x000D_	NA_x000D_
Cryptophyta	Cryptophyta	Rhodomonas sp. NIES-2332	NA_x000D_	NA_x000D_	(BDA98994.1)_x000D_ 6.8E-20	NA_x000D_	NA_x000D_	NA_x000D_	NA_x000D_	NA_x000D_	(BDA98994.1)_x000D_ 4.1E-31	NA_x000D_	NA_x000D_	NA_x000D_	NA_x000D_	NA_x000D_	NA_x000D_	NA_x000D_	(BDA99029.1)_x000D_ 9E-21	NA_x000D_	(BDA98969.1)_x000D_ 3.9E-29	NA_x000D_	NA_x000D_
Cryptophyta	Cryptophyta	Rhodomonas sp. NIES-698	NA_x000D_	NA_x000D_	(BDA97732.1)_x000D_ 5.5E-20	NA_x000D_	NA_x000D_	NA_x000D_	NA_x000D_	NA_x000D_	(BDA97732.1)_x000D_ 1.6E-31	NA_x000D_	NA_x000D_	NA_x000D_	NA_x000D_	NA_x000D_	NA_x000D_	NA_x000D_	(BDA97767.1)_x000D_ 4E-21	NA_x000D_	(BDA97707.1)_x000D_ 1.1E-27	NA_x000D_	NA_x000D_
Cryptophyta	Cryptophyta	Storeatula sp. CCMP1868	NA_x000D_	NA_x000D_	(ASO75923.1)_x000D_ 6.9E-19	NA_x000D_	NA_x000D_	NA_x000D_	NA_x000D_	NA_x000D_	(ASO75923.1)_x000D_ 4.3E-30	NA_x000D_	NA_x000D_	NA_x000D_	NA_x000D_	NA_x000D_	NA_x000D_	NA_x000D_	(ASO75958.1)_x000D_ 1E-21	NA_x000D_	(ASO75898.1)_x000D_ 1.9E-24	NA_x000D_	NA_x000D_
Cryptophyta	Cryptophyta	Teleaulax amphioxeia	NA_x000D_	NA_x000D_	(YP_009159220.1)_x000D_ 6.4E-19	NA_x000D_	NA_x000D_	NA_x000D_	NA_x000D_	NA_x000D_	(YP_009159220.1)_x000D_ 2.1E-29	NA_x000D_	NA_x000D_	NA_x000D_	NA_x000D_	NA_x000D_	NA_x000D_	NA_x000D_	(YP_009159255.1)_x000D_ 3E-20	NA_x000D_	(YP_009159195.1)_x000D_ 9.1E-28	NA_x000D_	NA_x000D_
Dinoflagellates	Dinoflagellates	Alexandrium fundyense	NA_x000D_	NA_x000D_	NA_x000D_	NA_x000D_	NA_x000D_	NA_x000D_	NA_x000D_	NA_x000D_	(ABO47881.1)_x000D_ 1.4E-11	NA_x000D_	NA_x000D_	NA_x000D_	NA_x000D_	NA_x000D_	NA_x000D_	NA_x000D_	NA_x000D_	NA_x000D_	NA_x000D_	NA_x000D_	NA_x000D_
Dinoflagellates	Dinoflagellates	Durinskia baltica	NA_x000D_	NA_x000D_	(YP_003735011.1)_x000D_ 7.7E-18	NA_x000D_	NA_x000D_	NA_x000D_	NA_x000D_	NA_x000D_	(YP_003735011.1)_x000D_ 5.1E-22	NA_x000D_	NA_x000D_	NA_x000D_	NA_x000D_	NA_x000D_	NA_x000D_	NA_x000D_	NA_x000D_	NA_x000D_	NA_x000D_	NA_x000D_	NA_x000D_
Dinoflagellates	Dinoflagellates	Heterocapsa rotundata	NA_x000D_	NA_x000D_	NA_x000D_	NA_x000D_	NA_x000D_	NA_x000D_	NA_x000D_	NA_x000D_	(ABV72553.1)_x000D_ 4E-10	NA_x000D_	NA_x000D_	NA_x000D_	NA_x000D_	NA_x000D_	NA_x000D_	NA_x000D_	NA_x000D_	NA_x000D_	NA_x000D_	NA_x000D_	NA_x000D_
Dinoflagellates	Dinoflagellates	Heterocapsa triquetra	NA_x000D_	NA_x000D_	NA_x000D_	NA_x000D_	NA_x000D_	NA_x000D_	NA_x000D_	NA_x000D_	NA_x000D_	NA_x000D_	NA_x000D_	NA_x000D_	NA_x000D_	NA_x000D_	NA_x000D_	NA_x000D_	(AAW79290.1)_x000D_ 7E-11	NA_x000D_	NA_x000D_	NA_x000D_	NA_x000D_
Dinoflagellates	Dinoflagellates	Karlodinium veneficum	NA_x000D_	NA_x000D_	NA_x000D_	NA_x000D_	NA_x000D_	NA_x000D_	NA_x000D_	NA_x000D_	(ACU45259.1)_x000D_ 2.7E-11	NA_x000D_	NA_x000D_	NA_x000D_	NA_x000D_	NA_x000D_	(ADV91205.1)_x000D_ 4.9E-70	NA_x000D_	(ABA55532.1)_x000D_ 3E-17	NA_x000D_	NA_x000D_	NA_x000D_	NA_x000D_
Dinoflagellates	Dinoflagellates	Kryptoperidinium foliaceum	NA_x000D_	NA_x000D_	(YP_003734575.1)_x000D_ 5.1E-18	NA_x000D_	NA_x000D_	NA_x000D_	NA_x000D_	NA_x000D_	(YP_003734575.1)_x000D_ 7.3E-23	NA_x000D_	NA_x000D_	NA_x000D_	NA_x000D_	NA_x000D_	NA_x000D_	NA_x000D_	NA_x000D_	NA_x000D_	NA_x000D_	NA_x000D_	NA_x000D_
Dinoflagellates	Dinoflagellates	Lingulodinium polyedra	NA_x000D_	NA_x000D_	NA_x000D_	NA_x000D_	NA_x000D_	NA_x000D_	NA_x000D_	NA_x000D_	NA_x000D_	NA_x000D_	NA_x000D_	NA_x000D_	NA_x000D_	NA_x000D_	(ABV25600.1)_x000D_ 1.6E-45	NA_x000D_	NA_x000D_	NA_x000D_	NA_x000D_	NA_x000D_	NA_x000D_
Dinoflagellates	Dinoflagellates	Pfiesteria piscicida	NA_x000D_	NA_x000D_	NA_x000D_	NA_x000D_	NA_x000D_	NA_x000D_	NA_x000D_	NA_x000D_	(ABI14275.1)_x000D_ 5.7E-08	NA_x000D_	NA_x000D_	NA_x000D_	NA_x000D_	NA_x000D_	(ABI14210.1)_x000D_ 6.8E-46	NA_x000D_	NA_x000D_	NA_x000D_	NA_x000D_	NA_x000D_	NA_x000D_
Dinoflagellates	Dinoflagellates	Polarella glacialis	NA_x000D_	(CAE8623328.1)_x000D_ 1.3E-45	(CAE8621402.1)_x000D_ 3E-25	(CAE8592718.1)_x000D_ 2E-69	(CAE8596136.1)_x000D_ 4E-15	(CAE8606667.1)_x000D_ 3E-36	(CAE8598644.1)_x000D_ 3E-27	(CAE8598644.1)_x000D_ 3E-22	(CAE8626429.1)_x000D_ 8E-18	NA_x000D_	(CAE8718650.1)_x000D_ 3.4E-20	NA_x000D_	NA_x000D_	(CAE8661781.1)_x000D_ 1E-17	(CAE8661781.1)_x000D_ 1E-17	(CAE8622763.1)_x000D_ 4E-70	(CAE8594341.1)_x000D_ 1E-15	(CAE8622460.1)_x000D_ 2E-72	NA_x000D_	CAE8621682.1_x000D_ 1E-11	NA_x000D_
Dinoflagellates	Dinoflagellates	Pyrocystis lunula	NA_x000D_	NA_x000D_	NA_x000D_	NA_x000D_	NA_x000D_	NA_x000D_	NA_x000D_	NA_x000D_	NA_x000D_	NA_x000D_	NA_x000D_	NA_x000D_	NA_x000D_	NA_x000D_	(ABV25601.1)_x000D_ 9.1E-38	NA_x000D_	NA_x000D_	NA_x000D_	NA_x000D_	NA_x000D_	NA_x000D_
Dinoflagellates	Dinoflagellates	Symbiodinium microadriaticum	NA_x000D_	(CAE7162301.1)_x000D_ 3E-15	(CAE7651007.1)_x000D_ 1E-19	(OLQ10295.1)_x000D_ 2E-60	(CAE7869953.1)_x000D_ 4E-15	(CAE7528913.1)_x000D_ 8E-38	(CAE7233252.1)_x000D_ 3E-15	(CAE7233252.1)_x000D_ 2E-17	(CAE7883768.1)_x000D_ 6E-15	NA_x000D_	(CAE7451312.1)_x000D_ 7.4E-19	NA_x000D_	NA_x000D_	(CAE7883794.1)_x000D_ 5E-21	(CAE7883794.1)_x000D_ 5E-21	(CAE7886120.1)_x000D_ 1E-79	(OLP87066.1)_x000D_ 2.3E-34	(OLQ07625.1)_x000D_ 2E-73	NA_x000D_	CAE7594582.1_x000D_ 2E-105	(CAE7349941.1)_x000D_ 9E-77
Dinoflagellates	Dinoflagellates	Symbiodinium natans	NA_x000D_	(CAE7357472.1)_x000D_ 1E-08	(CAE7460848.1)_x000D_ 2E-19	(CAE7408382.1)_x000D_ 2E-70	CAE7441939.1_x000D_ 1.2E-66	(CAE7530528.1)_x000D_ 2E-34	(CAE7480314.1)_x000D_ 2E-19	(CAE7480314.1)_x000D_ 2E-20	(CAE7431264.1)_x000D_ 6E-16	NA_x000D_	(CAE7446308.1)_x000D_ 1.4E-12	NA_x000D_	NA_x000D_	(CAE7343016.1)_x000D_ 6E-21	(CAE7343016.1)_x000D_ 6E-21	(CAE7374541.1)_x000D_ 3E-76	(CAE7342823.1)_x000D_ 1E-16	NA_x000D_	NA_x000D_	CAE7561257.1_x000D_ 2E-13	(CAE7577816.1)_x000D_ 6E-10
Dinoflagellates	Dinoflagellates	Symbiodinium necroappetens	NA_x000D_	(CAE7925040.1)_x000D_ 2.9E-09	(CAE7681520.1)_x000D_ 3E-20	(CAE7727934.1)_x000D_ 2E-29	CAE7267744.1_x000D_ 2.2E-66	(CAE7639992.1)_x000D_ 1E-38	(CAE7605287.1)_x000D_ 7E-68	(CAE7624189.1)_x000D_ 3.5E-84	(CAE7527060.1)_x000D_ 3E-12	NA_x000D_	(CAE7834596.1)_x000D_ 1.7E-18	NA_x000D_	NA_x000D_	(CAE7842169.1)_x000D_ 2E-16	(CAE7842169.1)_x000D_ 2E-16	(CAE7247926.1)_x000D_ 1E-79	(CAE7267700.1)_x000D_ 4E-19	NA_x000D_	NA_x000D_	CAE7149293.1_x000D_ 2E-95	(CAE7836470.1)_x000D_ 7E-77
Dinoflagellates	Dinoflagellates	Symbiodinium pilosum	NA_x000D_	(CAE7216629.1)_x000D_ 1.5E-11	(CAE7187388.1)_x000D_ 4E-21	(CAE7663036.1)_x000D_ 1E-68	CAE7773777.1_x000D_ 8.4E-76	(CAE7334007.1)_x000D_ 6E-26	(CAE7718278.1)_x000D_ 6E-52	(CAE7718278.1)_x000D_ 3.6E-84	(CAE7268795.1)_x000D_ 4E-15	NA_x000D_	(CAE7644332.1)_x000D_ 1E-16	NA_x000D_	NA_x000D_	(CAE7656161.1)_x000D_ 5E-19	(CAE7656161.1)_x000D_ 5E-19	(CAE7517787.1)_x000D_ 3E-66	(CAE7549774.1)_x000D_ 1E-13	NA_x000D_	NA_x000D_	CAE7149197.1_x000D_ 4E-91	(CAE7282015.1)_x000D_ 3E-15
Dinoflagellates	Dinoflagellates	Symbiodinium sp.	NA_x000D_	NA_x000D_	NA_x000D_	NA_x000D_	NA_x000D_	NA_x000D_	NA_x000D_	NA_x000D_	(UCR60989.1)_x000D_ 1.5E-15	NA_x000D_	NA_x000D_	NA_x000D_	NA_x000D_	NA_x000D_	NA_x000D_	NA_x000D_	NA_x000D_	NA_x000D_	NA_x000D_	NA_x000D_	NA_x000D_
Dinoflagellates	Dinoflagellates	Symbiodinium sp. CCMP2456	NA_x000D_	(CAE7629191.1)_x000D_ 6.1E-10	(CAE7506318.1)_x000D_ 3E-20	(CAE7656282.1)_x000D_ 1E-71	CAE7481706.1_x000D_ 1.2E-61	(CAE7598039.1)_x000D_ 5E-39	(CAE7464996.1) 1E-08	(CAE7464996.1)_x000D_ 2E-10	(CAE7365985.1)_x000D_ 1E-15	NA_x000D_	(CAE7335286.1)_x000D_ 6.1E-19	NA_x000D_	NA_x000D_	(CAE7037830.1)_x000D_ 2E-20	(CAE7037830.1)_x000D_ 2E-20	(CAE7635594.1)_x000D_ 5E-72	(CAE7740398.1)_x000D_ 1E-10	(CAE7540573.1)_x000D_ 9E-93	NA_x000D_	CAE7673317.1_x000D_ 1E-13	(CAE7412776.1)_x000D_ 3E-90
Dinoflagellates	Dinoflagellates	Symbiodinium sp. CCMP2592	NA_x000D_	(CAE7029078.1)_x000D_ 1E-10	(CAE7582507.1)_x000D_ 6E-21	(CAE7255398.1)_x000D_ 9E-73	(CAE7242659.1)_x000D_ 2E-16	(CAE6967678.1)_x000D_ 1E-33	(CAE7607265.1)_x000D_ 5E-17	(CAE7607265.1)_x000D_ 4E-18	(CAE7690350.1)_x000D_ 2E-12	NA_x000D_	(CAE7735739.1)_x000D_ 1.1E-18	NA_x000D_	NA_x000D_	(CAE7735577.1)_x000D_ 2E-21	(CAE7735577.1)_x000D_ 2E-21	(CAE7765494.1)_x000D_ 5E-80	(CAE7755397.1)_x000D_ 3E-15	NA_x000D_	NA_x000D_	CAE7759237.1_x000D_ 2E-84	(CAE7758017.1)_x000D_ 3E-76
Dinoflagellates	Dinoflagellates	Symbiodinium sp. KB8	NA_x000D_	(CAE7917859.1)_x000D_ 1E-107	(CAE7837175.1)_x000D_ 3E-22	(CAE7945430.1)_x000D_ 1E-69	(CAE7942283.1)_x000D_ 2E-15	(CAE7629788.1)_x000D_ 2E-53	(CAE7877889.1)_x000D_ 1E-67	(CAE7947403.1)_x000D_ 4.1E-87	(CAE7636739.1)_x000D_ 2E-12	NA_x000D_	(CAE7241125.1)_x000D_ 2.5E-14	NA_x000D_	NA_x000D_	(CAE7711315.1)_x000D_ 2.8E-154	(CAE7299937.1)_x000D_ 5.4E-103	(CAE7948399.1)_x000D_ 5E-80	(CAE7278848.1)_x000D_ 5E-08	(CAE7279157.1)_x000D_ 2E-100	NA_x000D_	CAE7719373.1_x000D_ 4E-13	NA_x000D_
Dinoflagellates	Dinoflagellates	Tripos horridus	NA_x000D_	NA_x000D_	(AAO85447.1)_x000D_ 8.9E-22	NA_x000D_	NA_x000D_	NA_x000D_	NA_x000D_	NA_x000D_	(AAO85447.1)_x000D_ 7.1E-25	NA_x000D_	NA_x000D_	NA_x000D_	NA_x000D_	NA_x000D_	NA_x000D_	NA_x000D_	NA_x000D_	NA_x000D_	NA_x000D_	NA_x000D_	NA_x000D_
Dinoflagellates	Dinoflagellates	Amoebophrya sp. A120	NA_x000D_	(CAD7945556.1)_x000D_ 3.6E-129	(CAD7932634.1)_x000D_ 9E-16	(CAD7956077.1)_x000D_ 4E-45	CAD7929325.1_x000D_ 1.9E-66	(CAD7927341.1)_x000D_ 1E-31	(CAD7937079.1)_x000D_ 2E-23	(CAD7937079.1)_x000D_ 4E-29	(CAD7961305.1)_x000D_ 1E-15	NA_x000D_	(CAD7944310.1)_x000D_ 2.6E-14	NA_x000D_	NA_x000D_	(CAD7944889.1)_x000D_ 1E-10	(CAD7944889.1)_x000D_ 1E-10	(CAD7940491.1)_x000D_ 3.2E-78	(CAD7963428.1)_x000D_ 7.7E-42	(CAD7928857.1)_x000D_ 3E-78	NA_x000D_	CAD7974556.1_x000D_ 1E-15	NA_x000D_
Dinoflagellates	Dinoflagellates	Amoebophrya sp. A25	NA_x000D_	(CAD7962824.1)_x000D_ 3.8E-152	(CAD7940838.1)_x000D_ 1E-19	(CAD7941221.1)_x000D_ 6E-39	CAD7924383.1_x000D_ 1.6E-64	(CAD7938275.1)_x000D_ 7E-31	(CAD7975045.1)_x000D_ 5E-14	(CAD7932402.1)_x000D_ 5E-27	(CAD7961403.1)_x000D_ 4E-12	NA_x000D_	(CAD7939244.1)_x000D_ 5E-14	NA_x000D_	NA_x000D_	(CAD7952919.1)_x000D_ 3E-11	(CAD7952919.1)_x000D_ 3E-11	(CAD7928663.1)_x000D_ 3.2E-77	(CAD7944751.1)_x000D_ 1.8E-22	(CAD7925062.1)_x000D_ 7E-61	NA_x000D_	CAD7952796.1_x000D_ 2E-15	NA_x000D_
Dinoflagellates	Dinoflagellates	Amphidinium carterae	NA_x000D_	NA_x000D_	NA_x000D_	NA_x000D_	NA_x000D_	NA_x000D_	NA_x000D_	NA_x000D_	(ADV03064.1)_x000D_ 3.2E-08	NA_x000D_	NA_x000D_	NA_x000D_	NA_x000D_	NA_x000D_	NA_x000D_	(ABV22077.1)_x000D_ 4.4E-15	NA_x000D_	NA_x000D_	NA_x000D_	NA_x000D_	NA_x000D_
Dinoflagellates	Dinoflagellates	Dinophysis acuminata	NA_x000D_	NA_x000D_	NA_x000D_	NA_x000D_	NA_x000D_	NA_x000D_	NA_x000D_	NA_x000D_	NA_x000D_	NA_x000D_	NA_x000D_	NA_x000D_	NA_x000D_	NA_x000D_	NA_x000D_	(ADI99942.1)_x000D_ 1E-35	NA_x000D_	NA_x000D_	NA_x000D_	NA_x000D_	NA_x000D_
Dinoflagellates	Dinoflagellates	Karenia brevis	NA_x000D_	NA_x000D_	NA_x000D_	NA_x000D_	NA_x000D_	NA_x000D_	NA_x000D_	NA_x000D_	NA_x000D_	NA_x000D_	NA_x000D_	NA_x000D_	NA_x000D_	NA_x000D_	NA_x000D_	NA_x000D_	NA_x000D_	NA_x000D_	NA_x000D_	ABF73000.1_x000D_ 6.3E-53	NA_x000D_
Dinoflagellates	Dinoflagellates	Noctiluca scintillans	NA_x000D_	NA_x000D_	NA_x000D_	NA_x000D_	NA_x000D_	NA_x000D_	NA_x000D_	NA_x000D_	NA_x000D_	NA_x000D_	NA_x000D_	NA_x000D_	NA_x000D_	NA_x000D_	(ABV22325.1)_x000D_ 3E-70	NA_x000D_	NA_x000D_	NA_x000D_	NA_x000D_	NA_x000D_	NA_x000D_
Dinoflagellates	Dinoflagellates	Polykrikos lebourae	NA_x000D_	NA_x000D_	NA_x000D_	NA_x000D_	NA_x000D_	NA_x000D_	NA_x000D_	NA_x000D_	NA_x000D_	NA_x000D_	NA_x000D_	NA_x000D_	NA_x000D_	NA_x000D_	NA_x000D_	NA_x000D_	(AKR52925.1)_x000D_ 7E-09	NA_x000D_	NA_x000D_	NA_x000D_	NA_x000D_
Dinoflagellates	Dinoflagellates	Prorocentrum lima	NA_x000D_	NA_x000D_	(QCO69321.1)_x000D_ 2E-21	NA_x000D_	NA_x000D_	NA_x000D_	NA_x000D_	NA_x000D_	(QCO69319.1)_x000D_ 5.2E-71	NA_x000D_	NA_x000D_	NA_x000D_	NA_x000D_	NA_x000D_	NA_x000D_	NA_x000D_	NA_x000D_	NA_x000D_	NA_x000D_	NA_x000D_	NA_x000D_
Dinoflagellates	Dinoflagellates	Prorocentrum minimum	NA_x000D_	NA_x000D_	(AND95787.1)_x000D_ 1.7E-21	NA_x000D_	NA_x000D_	NA_x000D_	NA_x000D_	NA_x000D_	(AND95787.1)_x000D_ 2E-22	NA_x000D_	NA_x000D_	NA_x000D_	NA_x000D_	NA_x000D_	(AND95786.1)_x000D_ 2.2E-33	(ACU45155.1)_x000D_ 3E-14	NA_x000D_	NA_x000D_	NA_x000D_	NA_x000D_	(AHK23677.1)_x000D_ 5.3E-76
Haptophyta	Haptophyta	Chrysochromulina tobinii	(KOO35923.1)_x000D_ 1.5E-134	(KOO35923.1)_x000D_ 2E-27	(KOO21596.1)_x000D_ 3E-27	(KOO26559.1)_x000D_ 3.2E-22	(KOO33098.1)_x000D_ 6E-08	((KOO34197.1))_x000D_ 2E-42	NA_x000D_	(KOO28397.1)_x000D_	((KOO25459.1))_x000D_ 7E-17	NA_x000D_	(KOO20896.1)_x000D_	NA_x000D_	NA_x000D_	NA_x000D_	(KOO34980.1)_x000D_	(KOO31396.1)_x000D_ 3.3E-113	(KOO22036.1)_x000D_ 3.3E-39	(KOO24816.1)_x000D_	NA_x000D_	KOO28224.1_x000D_	NA_x000D_
Haptophyta	Haptophyta	Diacronema lutheri	(KAG8460053.1)_x000D_ 9.6E-135	(KAG8460053.1)_x000D_ 6E-27	(KAG8463488.1)_x000D_ 2E-27	(KAG8463766.1)_x000D_	KAG8460909.1_x000D_ 1.9E-150	((KAG8465483.1))_x000D_ 1E-56	NA_x000D_	(KAG8461400.1)_x000D_ 7.7E-93	((KAG8460736.1))_x000D_ 2E-27	NA_x000D_	(KAG8467534.1)_x000D_	NA_x000D_	NA_x000D_	NA_x000D_	(KAG8463632.1)_x000D_	(KAG8464122.1)_x000D_ 6.9E-113	(KAG8456970.1)_x000D_ 1.5E-37	(KAG8464657.1)_x000D_	NA_x000D_	KAG8461942.1_x000D_	(KAG8466156.1)_x000D_ 1.4E-114
Haptophyta	Haptophyta	Emiliania huxleyi CCMP1516	(XP_005756325.1)_x000D_ 1.1E-82	(XP_005778716.1)_x000D_ 4E-16	(XP_005761817.1)_x000D_ 3E-24	(XP_005776743.1)_x000D_	(XP_005762733.1)_x000D_ 1E-10	((XP_005771454.1))_x000D_ 8E-41	(XP_005779023.1)_x000D_ 9.8E-26	(XP_005760969.1)_x000D_ 8.7E-80	((XP_005756786.1))_x000D_ 3E-17	NA_x000D_	(XP_005767172.1)_x000D_	NA_x000D_	NA_x000D_	(XP_005765413.1)_x000D_	(XP_005765013.1)_x000D_	(XP_005787855.1)_x000D_ 4.9E-114	(XP_005775653.1)_x000D_ 5.3E-94	(XP_005793736.1)_x000D_	NA_x000D_	XP_005773037.1_x000D_	(XP_005784169.1)_x000D_ 7.8E-99
Haptophyta	Haptophyta	Isochrysis galbana	NA_x000D_	NA_x000D_	NA_x000D_	NA_x000D_	NA_x000D_	NA_x000D_	NA_x000D_	NA_x000D_	NA_x000D_	NA_x000D_	NA_x000D_	NA_x000D_	NA_x000D_	NA_x000D_	NA_x000D_	NA_x000D_	(AAW79288.1)_x000D_ 2.7E-41	NA_x000D_	NA_x000D_	NA_x000D_	NA_x000D_
Haptophyta	Haptophyta	Prymnesium parvum	NA_x000D_	NA_x000D_	NA_x000D_	NA_x000D_	NA_x000D_	NA_x000D_	NA_x000D_	NA_x000D_	NA_x000D_	NA_x000D_	NA_x000D_	NA_x000D_	NA_x000D_	NA_x000D_	(ABV25606.1)_x000D_ 8.8E-45	NA_x000D_	NA_x000D_	NA_x000D_	NA_x000D_	NA_x000D_	NA_x000D_
Oomycota	Oomycota	Aphanomyces stellatus	(KAF0694592.1)_x000D_ 5.7E-97	(KAF0718409.1)_x000D_ 8.7E-121	(KAF0697304.1)_x000D_ 2.6E-248	(KAF0718901.1)_x000D_ 7.2E-211	KAF0700739.1_x000D_ 4.1E-196	(KAF0698271.1)_x000D_ 6.7E-251	(KAF0691879.1)_x000D_ 1.6E-113	NA_x000D_	(KAF0691937.1)_x000D_ 3.8E-100	NA_x000D_	(KAF0689464.1)_x000D_ 5.5E-20	NA_x000D_	NA_x000D_	NA_x000D_	(KAF0694274.1)_x000D_ 3.6E-130	(KAF0689098.1)_x000D_ 2.4E-93	(KAF0717316.1)_x000D_ 2.4E-44	(KAF0690123.1)_x000D_ 2.3E-193	NA_x000D_	KAF0700252.1_x000D_ 8.6E-82	NA_x000D_
Oomycota	Oomycota	Phytophthora boehmeriae	(KAG7394759.1)_x000D_ 6.3E-118	(KAG7394759.1)_x000D_ 7.6E-126	(KAG7397598.1)_x000D_ 2.3E-254	(KAG7400215.1)_x000D_ 1.1E-213	KAG7400004.1_x000D_ 6.1E-63	(KAG7399657.1)_x000D_ 6.9E-276	(KAG7382110.1)_x000D_ 9.5E-115	NA_x000D_	(KAG7402219.1)_x000D_ 3.4E-116	NA_x000D_	(KAG7398581.1)_x000D_ 4.7E-19	NA_x000D_	NA_x000D_	NA_x000D_	(KAG7399363.1)_x000D_ 2.8E-130	(KAG7398557.1)_x000D_ 1.1E-118	(KAG7397514.1)_x000D_ 9.2E-47	(KAG7396962.1)_x000D_ 2.4E-201	NA_x000D_	KAG7397458.1_x000D_ 7.9E-91	NA_x000D_
Oomycota	Oomycota	Phytophthora fragariae	(KAE9348000.1)_x000D_ 2.3E-107	(KAE9000061.1)_x000D_ 6.7E-125	(KAE9124677.1)_x000D_ 7.8E-254	(KAE9290170.1)_x000D_ 2E-214	KAE9019935.1_x000D_ 3.1E-172	(KAE9356719.1)_x000D_ 3.2E-280	(KAE8899015.1)_x000D_ 7.7E-116	NA_x000D_	(KAE8893498.1)_x000D_ 1.8E-118	NA_x000D_	(KAE8899859.1)_x000D_ 2.6E-23	NA_x000D_	NA_x000D_	NA_x000D_	(KAE8875159.1)_x000D_ 5.4E-130	(KAE8899877.1)_x000D_ 8.6E-123	(KAE9338615.1)_x000D_ 1E-46	(KAE8902126.1)_x000D_ 2.6E-200	NA_x000D_	KAE8885388.1_x000D_ 6E-91	NA_x000D_
Oomycota	Oomycota	Pythium oligandrum	(TMW56487.1)_x000D_ 2.3E-104	(TMW56487.1)_x000D_ 1.3E-118	(TMW67018.1)_x000D_ 1.4E-252	(TMW59190.1)_x000D_ 3.6E-199	TMW67789.1_x000D_ 1.6E-140	(TMW56079.1)_x000D_ 6.4E-263	(TMW55402.1)_x000D_ 5.8E-111	NA_x000D_	(TMW65412.1)_x000D_ 6.5E-126	NA_x000D_	(TMW63557.1)_x000D_ 1.7E-20	NA_x000D_	NA_x000D_	NA_x000D_	(TMW69496.1)_x000D_ 1.3E-132	(TMW63229.1)_x000D_ 1.1E-103	(TMW69353.1)_x000D_ 1.2E-45	(TMW69578.1)_x000D_ 7.1E-197	NA_x000D_	TMW62074.1_x000D_ 8.6E-87	NA_x000D_
Oomycota	Oomycota	Saprolegnia parasitica CBS 223.65	(XP_012197675.1)_x000D_ 4.9E-93	(XP_012197675.1)_x000D_ 2.4E-115	(XP_012203848.1)_x000D_ 1.7E-252	(XP_012211246.1)_x000D_ 2.6E-210	XP_012198411.1_x000D_ 4.2E-121	(XP_012194415.1)_x000D_ 3.8E-250	(XP_012194821.1)_x000D_ 4.3E-110	NA_x000D_	(XP_012204417.1)_x000D_ 6.5E-99	NA_x000D_	(XP_012206896.1)_x000D_ 5.6E-18	NA_x000D_	NA_x000D_	NA_x000D_	(XP_012204831.1)_x000D_ 1.6E-84	(XP_012205609.1)_x000D_ 2.4E-96	(XP_012205855.1)_x000D_ 1.6E-45	(XP_012205191.1)_x000D_ 2.6E-170	NA_x000D_	XP_012197171.1_x000D_ 2.6E-85	NA_x000D_
Perkinsozoa	Perkinsozoa	Perkinsus chesapeaki	(KAF4669662.1)_x000D_ 2.1E-134	(KAF4669662.1)_x000D_ 3E-12	(KAF4673598.1)_x000D_ 1E-21	(KAF4673664.1)_x000D_ 2E-82	NA_x000D_	(KAF4671242.1)_x000D_ 4E-34	(KAF4661665.1)_x000D_ 2E-19	(KAF4670127.1)_x000D_ 9E-30	(KAF4660646.1)_x000D_ 7E-14	NA_x000D_	(KAF4661700.1)_x000D_ 1.4E-40	NA_x000D_	NA_x000D_	(KAF4675242.1)_x000D_ 2E-144	(KAF4675242.1)_x000D_ 2.5E-173	(KAF4664188.1)_x000D_ 1E-70	NA_x000D_	(KAF4658788.1)_x000D_ 5E-98	NA_x000D_	KAF4677607.1_x000D_ 2.9E-97	(KAF4665256.1)_x000D_ 3E-11
Perkinsozoa	Perkinsozoa	Perkinsus honshuensis	NA_x000D_	NA_x000D_	NA_x000D_	NA_x000D_	NA_x000D_	NA_x000D_	NA_x000D_	NA_x000D_	NA_x000D_	NA_x000D_	NA_x000D_	NA_x000D_	NA_x000D_	NA_x000D_	NA_x000D_	NA_x000D_	NA_x000D_	NA_x000D_	NA_x000D_	NA_x000D_	(ABO34028.1)_x000D_ 3.7E-08
Perkinsozoa	Perkinsozoa	Perkinsus marinus ATCC 50439	NA_x000D_	NA_x000D_	NA_x000D_	NA_x000D_	NA_x000D_	NA_x000D_	NA_x000D_	NA_x000D_	NA_x000D_	NA_x000D_	NA_x000D_	NA_x000D_	NA_x000D_	NA_x000D_	NA_x000D_	NA_x000D_	NA_x000D_	NA_x000D_	NA_x000D_	NA_x000D_	(BAG14390.1)_x000D_ 3E-12
Perkinsozoa	Perkinsozoa	Perkinsus marinus ATCC 50983	(XP_002767790.1)_x000D_ 2.3E-30	(XP_002779075.1)_x000D_ 1E-14	(XP_002769266.1)_x000D_ 2E-21	(XP_002785461.1)_x000D_ 9E-74	NA_x000D_	(XP_002764681.1)_x000D_ 6E-25	(XP_002775769.1)_x000D_ 5E-20	(XP_002775769.1)_x000D_ 2E-33	(XP_002775542.1)_x000D_ 4E-14	XP_002786631.1_x000D_ 9E-08	(XP_002767898.1)_x000D_ 1.5E-23	NA_x000D_	NA_x000D_	(XP_002774056.1)_x000D_ 5E-147	(XP_002774056.1)_x000D_ 4.7E-171	(XP_002773984.1)_x000D_ 2.3E-105	NA_x000D_	(XP_002778818.1)_x000D_ 4E-104	NA_x000D_	NA_x000D_	(XP_002768499.1)_x000D_ 4E-11
Perkinsozoa	Perkinsozoa	Perkinsus olseni	(KAF4682257.1)_x000D_ 1.6E-183	KAF4682257.1_x000D_ 2E-21	(KAF4674627.1)_x000D_ 4E-23	(KAF4659226.1)_x000D_ 3E-70	NA_x000D_	(KAF4736195.1)_x000D_ 8E-36	(KAF4684560.1)_x000D_ 5E-23	(KAF4758408.1)_x000D_ 2E-36	(KAF4749719.1)_x000D_ 4E-14	KAF4710326.1_x000D_ 3E-08	(KAF4685660.1)_x000D_ 2.8E-45	NA_x000D_	NA_x000D_	(KAF4665400.1)_x000D_ 5E-150	(KAF4692184.1)_x000D_ 2.6E-297	(KAF4688874.1)_x000D_ 2.3E-108	NA_x000D_	(KAF4725587.1)_x000D_ 4E-106	NA_x000D_	KAF4670765.1_x000D_ 1.2E-98	(KAF4735226.1)_x000D_ 3E-11
Perkinsozoa	Perkinsozoa	Perkinsus sp. BL 2016	NA_x000D_	NA_x000D_	(TEB18331.1)_x000D_ 8E-16	NA_x000D_	NA_x000D_	NA_x000D_	(TEB20395.1)_x000D_ 4.1E-10	(TEB20395.1)_x000D_ 2E-16	(TEB19421.1)_x000D_ 3E-09	NA_x000D_	NA_x000D_	NA_x000D_	NA_x000D_	NA_x000D_	(TEB18547.1)_x000D_ 3.5E-42	NA_x000D_	NA_x000D_	(TEB19283.1)_x000D_ 1E-76	NA_x000D_	NA_x000D_	NA_x000D_
Piroplasmida	Babesia	Babesia bigemina	NA_x000D_	XP_012770224.1_x000D_ 7.6E-18	XP_012769172.1_x000D_ 9.6E-182	XP_012766602.1_x000D_ 6.4E-67	NA_x000D_	XP_012769745.1_x000D_ 6.9E-170	XP_012769535.1_x000D_ 1.1E-162	XP_012769535.1_x000D_ 3.8E-141	XP_012766429.1_x000D_ 8.1E-126	NA_x000D_	NA_x000D_	NA_x000D_	NA_x000D_	XP_012768227.1_x000D_ 9.6E-148	XP_012766947.1_x000D_ 8.6E-126	XP_012770278.1_x000D_ 1.2E-131	XP_012769879.1_x000D_ 4.7E-25	NA_x000D_	XP_012766405.1_x000D_ 4.8E-16	XP_012765891.1_x000D_ 3.7E-247	XP_012768583.1_x000D_ 5.3E-188
Piroplasmida	Babesia	Babesia bovis	NA_x000D_	BAN64468.1_x000D_ 2.1E-10	BAN66093.1_x000D_ 9.4E-68	NA_x000D_	NA_x000D_	NA_x000D_	NA_x000D_	BAN66213.1_x000D_ 3.4E-43	AAB66361.1_x000D_ 8.4E-113	NA_x000D_	NA_x000D_	NA_x000D_	NA_x000D_	NA_x000D_	BAN66098.1_x000D_ 5E-127	ABC25608.1_x000D_ 3.8E-138	AER59467.1_x000D_ 7.9E-24	NA_x000D_	NA_x000D_	NA_x000D_	BAN65298.1_x000D_ 1.2E-184
Piroplasmida	Babesia	Babesia bovis T2Bo	EDO05871.2_x000D_ 3.4E-76	EDO05871.2_x000D_ 2.6E-113	XP_001611712.1_x000D_ 6E-183	EDO07324.2_x000D_ 3.2E-63	NA_x000D_	EDO07112.2_x000D_ 6.1E-178	XP_001612026.1_x000D_ 2.2E-154	XP_001612026.1_x000D_ 9.6E-137	XP_001610736.1_x000D_ 2.3E-113	NA_x000D_	NA_x000D_	NA_x000D_	EDO05871.2_x000D_ 8.8E-13	XP_001609443.1_x000D_ 1.8E-142	XP_001609505.1_x000D_ 8.3E-127	XP_001609144.1_x000D_ 5.1E-138	XP_001609051.1_x000D_ 1E-22	NA_x000D_	KAG6440137.1_x000D_ 1.2E-19	XP_001609528.1_x000D_ 1.1E-243	XP_001611301.1_x000D_ 2.1E-184
Piroplasmida	Babesia	Babesia microti strain RI	XP_021338845.1_x000D_ 5.6E-101	XP_021338845.1_x000D_ 1.4E-109	XP_021338154.1_x000D_ 5.8E-118	XP_021338741.1_x000D_ 1E-55	NA_x000D_	NA_x000D_	XP_012649945.1_x000D_ 1E-117	XP_012649945.1_x000D_ 1.3E-121	XP_012648750.1_x000D_ 2.4E-83	NA_x000D_	NA_x000D_	NA_x000D_	XP_021338845.1_x000D_ 7E-35	XP_021338843.1_x000D_ 2.3E-132	XP_021338513.1_x000D_ 7.3E-145	XP_012647365.1_x000D_ 2E-131	XP_021338388.1_x000D_ 2E-19	NA_x000D_	NA_x000D_	XP_021337854.1_x000D_ 7.7E-203	XP_012649657.1_x000D_ 4.5E-179
Piroplasmida	Babesia	Babesia orientalis	NA_x000D_	NA_x000D_	NA_x000D_	NA_x000D_	NA_x000D_	NA_x000D_	NA_x000D_	NA_x000D_	NA_x000D_	NA_x000D_	NA_x000D_	NA_x000D_	NA_x000D_	NA_x000D_	NA_x000D_	NA_x000D_	NA_x000D_	NA_x000D_	NA_x000D_	NA_x000D_	AXL95197.1_x000D_ 3.8E-161
Piroplasmida	Babesia	Babesia ovata	XP_028866145.1_x000D_ 1.7E-70	XP_028866145.1_x000D_ 4.5E-102	XP_028865289.1_x000D_ 4.4E-178	XP_028866661.1_x000D_ 4.4E-61	NA_x000D_	XP_028868608.1_x000D_ 2.9E-35	XP_028864877.1_x000D_ 1.9E-158	XP_028864877.1_x000D_ 7.4E-141	XP_028866838.1_x000D_ 3.8E-90	NA_x000D_	NA_x000D_	NA_x000D_	XP_028866145.1_x000D_ 2.4E-11	XP_028866149.1_x000D_ 8.1E-135	XP_028866332.1_x000D_ 3.2E-124	XP_028868670.1_x000D_ 3.4E-132	XP_028868479.1_x000D_ 5.2E-24	NA_x000D_	NA_x000D_	XP_028867402.1_x000D_ 2.6E-247	XP_028865789.1_x000D_ 4.7E-184
Piroplasmida	Babesia	Babesia ovis	GFE55550.1_x000D_ 2.6E-65	GFE55550.1_x000D_ 4.5E-104	GFE53183.1_x000D_ 1.3E-181	GFE54144.1_x000D_ 4.6E-58	NA_x000D_	GFE53962.1_x000D_ 3.2E-177	GFE53491.1_x000D_ 8.4E-156	GFE53491.1_x000D_ 1.9E-138	GFE54005.1_x000D_ 1.1E-119	NA_x000D_	NA_x000D_	NA_x000D_	GFE55550.1_x000D_ 3.9E-12	GFE55553.1_x000D_ 5.6E-138	GFE55646.1_x000D_ 1.1E-125	GFE55929.1_x000D_ 1.7E-135	GFE53843.1_x000D_ 3.5E-25	NA_x000D_	GFE54801.1_x000D_ 1.8E-12	GFE55667.1_x000D_ 5.3E-249	GFE52822.1_x000D_ 2.3E-179
Piroplasmida	Babesia	Babesia sp. Xinjiang	XP_028871809.1_x000D_ 8.6E-47	XP_028871809.1_x000D_ 3.5E-79	XP_028872367.1_x000D_ 8.7E-176	NA_x000D_	NA_x000D_	XP_028871029.1_x000D_ 7.1E-181	XP_028870444.1_x000D_ 4.3E-92	XP_028870444.1_x000D_ 2.1E-81	XP_028872480.1_x000D_ 1.1E-115	NA_x000D_	NA_x000D_	NA_x000D_	XP_028871809.1_x000D_ 1.2E-12	XP_028871818.1_x000D_ 2.2E-144	XP_028870335.1_x000D_ 2.1E-128	XP_028871706.1_x000D_ 8.7E-135	XP_028870912.1_x000D_ 1.5E-24	NA_x000D_	NA_x000D_	XP_028870300.1_x000D_ 2.7E-269	XP_028872678.1_x000D_ 5.5E-97
Piroplasmida	Theileria	Theileria annulata	XP_955060.1_x000D_ 1.9E-77	XP_955060.1_x000D_ 1.3E-84	XP_951766.1_x000D_ 8.2E-200	XP_953979.1_x000D_ 3.8E-59	NA_x000D_	XP_954948.1_x000D_ 1.1E-193	XP_953436.1_x000D_ 2.5E-130	XP_953436.1_x000D_ 5.2E-102	XP_953813.1_x000D_ 5.8E-102	NA_x000D_	NA_x000D_	NA_x000D_	XP_955060.1_x000D_ 2.4E-30	XP_955055.1_x000D_ 5.8E-142	XP_953674.1_x000D_ 1.5E-138	XP_955232.1_x000D_ 1.9E-133	XP_952006.1_x000D_ 3.1E-22	NA_x000D_	NA_x000D_	XP_951952.1_x000D_ 7.9E-213	XP_955370.1_x000D_ 1.4E-164
Piroplasmida	Theileria	Theileria equi strain WA	XP_004832331.1_x000D_ 1.3E-83	XP_004832331.1_x000D_ 4.2E-92	XP_004832446.1_x000D_ 5.3E-206	XP_004833338.1_x000D_ 9.8E-33	NA_x000D_	XP_004832432.1_x000D_ 8E-169	XP_004831315.1_x000D_ 4.4E-142	XP_004831315.1_x000D_ 1.9E-134	XP_004833559.1_x000D_ 1E-91	NA_x000D_	NA_x000D_	NA_x000D_	XP_004832331.1_x000D_ 7.7E-31	XP_004832336.1_x000D_ 4.2E-133	XP_004833781.1_x000D_ 8.7E-148	XP_004832103.1_x000D_ 7.8E-133	XP_004829349.1_x000D_ 1.5E-25	NA_x000D_	NA_x000D_	XP_004829499.1_x000D_ 5E-212	XP_004832707.1_x000D_ 2.4E-184
Piroplasmida	Theileria	Theileria orientalis	NA_x000D_	PVC54413.1_x000D_ 3.8E-30	PVC50903.1_x000D_ 6.3E-228	PVC51945.1_x000D_ 4.7E-78	NA_x000D_	PVC49694.1_x000D_ 1.9E-166	NA_x000D_	NA_x000D_	PVC50038.1_x000D_ 9.7E-101	NA_x000D_	NA_x000D_	NA_x000D_	NA_x000D_	PVC52796.1_x000D_ 1.1E-138	UKK00827.1_x000D_ 5.6E-147	PVC51929.1_x000D_ 1.6E-74	PVC52165.1_x000D_ 1.2E-23	NA_x000D_	NA_x000D_	PVC50664.1_x000D_ 1.9E-218	PVC53280.1_x000D_ 8.5E-186
Piroplasmida	Theileria	Theileria orientalis strain Shintoku	XP_009691515.1_x000D_ 1.8E-106	XP_009691515.1_x000D_ 3E-118	XP_009690420.1_x000D_ 5.1E-199	XP_009689597.1_x000D_ 1.4E-56	NA_x000D_	XP_009691625.1_x000D_ 1.7E-168	XP_009692044.1_x000D_ 1.8E-139	XP_009692044.1_x000D_ 3.3E-130	XP_009689755.1_x000D_ 1.3E-100	NA_x000D_	NA_x000D_	NA_x000D_	XP_009691515.1_x000D_ 1.6E-32	XP_009691520.1_x000D_ 1.1E-138	XP_009689886.1_x000D_ 4.4E-138	XP_009691368.1_x000D_ 2E-129	XP_009690721.1_x000D_ 9E-25	NA_x000D_	NA_x000D_	XP_009690841.1_x000D_ 3.5E-217	XP_009691238.1_x000D_ 1.2E-182
Piroplasmida	Theileria	Theileria parva	NA_x000D_	NA_x000D_	AAB48513.1_x000D_ 9.2E-86	NA_x000D_	NA_x000D_	NA_x000D_	NA_x000D_	NA_x000D_	AAK72899.1_x000D_ 2.2E-39	NA_x000D_	NA_x000D_	NA_x000D_	NA_x000D_	NA_x000D_	NA_x000D_	NA_x000D_	NA_x000D_	NA_x000D_	NA_x000D_	NA_x000D_	NA_x000D_
Piroplasmida	Theileria	Theileria parva strain Muguga	XP_763394.1_x000D_ 1.9E-101	XP_763394.1_x000D_ 9.1E-115	XP_763026.1_x000D_ 5.4E-200	EAN34036.2_x000D_ 3.5E-80	NA_x000D_	XP_763276.1_x000D_ 3.5E-197	XP_764440.1_x000D_ 1.1E-140	XP_764440.1_x000D_ 1.6E-132	XP_766482.1_x000D_ 2.7E-102	NA_x000D_	NA_x000D_	NA_x000D_	XP_763394.1_x000D_ 3.6E-30	XP_763389.1_x000D_ 7.2E-146	XP_766621.1_x000D_ 9.5E-147	XP_763564.1_x000D_ 1.4E-134	XP_765274.1_x000D_ 9.7E-23	NA_x000D_	NA_x000D_	EAN33055.2_x000D_ 1.1E-227	XP_762798.1_x000D_ 6.3E-185
Haemoporida	Hepatocysits	Hepatocystis sp. ex Piliocolobus tephrosceles	VWU50795.1_x000D_ 2.4E-147	VWU50795.1_x000D_ 1.4E-163	VWU51294.1_x000D_ 3.7E-201	VWU52576.1_x000D_ 1.8E-169	NA_x000D_	VWU49038.1_x000D_ 2.3E-145	VWU53154.1_x000D_ 1.6E-139	VWU53154.1_x000D_ 1.8E-144	VWU49154.1_x000D_ 1.2E-102	NA_x000D_	NA_x000D_	NA_x000D_	VWU50795.1_x000D_ 7E-50	VWU51892.1_x000D_ 1.9E-169	VWU48141.1_x000D_ 4.6E-148	VWU48428.1_x000D_ 6.4E-140	VWU50303.1_x000D_ 4.1E-31	VWU48468.1_x000D_ 6E-209	VWU50133.1_x000D_ 3.7E-71	VWU49643.1_x000D_ 1.9E-230	VWU52357.1_x000D_ 1.6E-199
Haemoporida	Plasmodium	Plasmodium berghei ANKA	XP_034419956.1_x000D_ 1.9E-160	XP_034419956.1_x000D_ 8.2E-176	XP_034424262.1_x000D_ 1E-200	XP_034421773.1_x000D_ 3.8E-202	NA_x000D_	XP_034420439.1_x000D_ 2.4E-253	XP_034420646.1_x000D_ 4.5E-144	XP_034420646.1_x000D_ 1.3E-148	XP_034423052.1_x000D_ 9E-109	NA_x000D_	NA_x000D_	NA_x000D_	XP_034419956.1_x000D_ 1.5E-50	XP_034419951.1_x000D_ 4E-184	XP_034420512.1_x000D_ 3.6E-155	XP_034422288.1_x000D_ 5E-145	XP_034419940.1_x000D_ 6.4E-32	XP_034423731.1_x000D_ 4.9E-222	XP_034423112.1_x000D_ 5.3E-75	XP_034424206.1_x000D_ 2E-260	XP_034419813.1_x000D_ 2.7E-203
Haemoporida	Plasmodium	Plasmodium chabaudi adami	SCM00405.1_x000D_ 3.6E-160	SCM00405.1_x000D_ 1.6E-174	SCN63322.1_x000D_ 2E-196	SCN60053.1_x000D_ 9.9E-201	NA_x000D_	SCM03341.1_x000D_ 7.1E-251	SCM19446.1_x000D_ 3E-146	SCM19446.1_x000D_ 4.9E-151	SCM23344.1_x000D_ 1.7E-109	NA_x000D_	NA_x000D_	NA_x000D_	SCM00405.1_x000D_ 1.3E-49	SCM00367.1_x000D_ 1.6E-186	SCM19311.1_x000D_ 2.3E-152	SCN62542.1_x000D_ 1.6E-139	SCM04930.1_x000D_ 8E-34	SCM13169.1_x000D_ 1.3E-220	SCN62526.1_x000D_ 6.7E-78	SCM25254.1_x000D_ 2.6E-269	SCL99485.1_x000D_ 6.3E-205
Haemoporida	Plasmodium	Plasmodium chabaudi chabaudi	SCL97444.1_x000D_ 3.9E-160	XP_746198.1_x000D_ 9.7E-175	SCM26617.1_x000D_ 3.1E-198	XP_016655276.1_x000D_ 5.9E-200	NA_x000D_	XP_016655230.1_x000D_ 1.1E-251	SCM19855.1_x000D_ 2.1E-146	SCM19855.1_x000D_ 4.2E-151	XP_736914.2_x000D_ 1.7E-108	NA_x000D_	NA_x000D_	NA_x000D_	XP_746198.1_x000D_ 1.2E-49	SCL97419.1_x000D_ 5.2E-187	XP_743483.2_x000D_ 8.2E-153	XP_745978.2_x000D_ 7.9E-142	XP_016653182.1_x000D_ 7.4E-34	XP_740637.2_x000D_ 8.9E-221	SCN62529.1_x000D_ 6.8E-78	SCN63248.1_x000D_ 7.4E-269	SCL96526.1_x000D_ 6.7E-205
Haemoporida	Plasmodium	Plasmodium coatneyi	XP_019913257.1_x000D_ 3.8E-158	XP_019913257.1_x000D_ 2.2E-175	XP_019917557.1_x000D_ 9.5E-232	XP_019915183.1_x000D_ 7.8E-205	NA_x000D_	XP_019913747.1_x000D_ 1.1E-250	XP_019912942.1_x000D_ 3.3E-149	XP_019912942.1_x000D_ 1.4E-153	XP_019915241.1_x000D_ 1.6E-113	NA_x000D_	NA_x000D_	NA_x000D_	XP_019913257.1_x000D_ 9.5E-51	XP_019913259.1_x000D_ 5.5E-185	XP_019917747.1_x000D_ 2E-53	XP_019915520.1_x000D_ 2.7E-144	XP_019913226.1_x000D_ 6.7E-28	XP_019916094.1_x000D_ 2.9E-215	XP_019915448.1_x000D_ 1.1E-78	XP_019917619.1_x000D_ 9.8E-264	XP_019912723.1_x000D_ 3.5E-203
Haemoporida	Plasmodium	Plasmodium cynomolgi strain B	XP_004225396.1_x000D_ 9.8E-159	XP_004225396.1_x000D_ 1E-174	XP_004225067.1_x000D_ 1.3E-232	XP_004222279.1_x000D_ 7.7E-122	NA_x000D_	XP_004221519.1_x000D_ 1.5E-246	XP_004220924.1_x000D_ 9.3E-149	XP_004220924.1_x000D_ 7.5E-154	XP_004222784.1_x000D_ 2.7E-116	NA_x000D_	NA_x000D_	NA_x000D_	XP_004225396.1_x000D_ 1.2E-51	XP_004225402.1_x000D_ 5.7E-188	XP_004224183.1_x000D_ 3.8E-154	XP_004222714.1_x000D_ 5.1E-141	XP_004225413.1_x000D_ 2E-33	XP_004223570.1_x000D_ 1.7E-214	XP_004222722.1_x000D_ 8.8E-77	XP_004225009.1_x000D_ 2E-265	XP_004220592.1_x000D_ 1.4E-175
Haemoporida	Plasmodium	Plasmodium falciparum 3D7	XP_001349611.1_x000D_ 3.2E-162	XP_001349611.1_x000D_ 2.1E-178	XP_001351050.1_x000D_ 5.3E-222	XP_001347735.1_x000D_ 2.1E-206	NA_x000D_	XP_001347644.2_x000D_ 1E-262	XP_001349072.1_x000D_ 1.8E-147	XP_001349072.1_x000D_ 1.4E-152	XP_001351787.1_x000D_ 9.6E-113	NA_x000D_	NA_x000D_	NA_x000D_	XP_001349611.1_x000D_ 1.1E-49	XP_001349605.2_x000D_ 1.8E-190	XP_001350431.1_x000D_ 5.4E-157	XP_001351641.1_x000D_ 4.2E-144	XP_001349595.1_x000D_ 4.3E-36	XP_001350160.1_x000D_ 8.9E-214	XP_001351847.1_x000D_ 1.8E-73	XP_001350630.1_x000D_ 7.1E-267	XP_001350977.1_x000D_ 1.1E-206
Haemoporida	Plasmodium	Plasmodium fragile	XP_012336871.1_x000D_ 1.8E-159	XP_012336871.1_x000D_ 9.2E-176	XP_012335391.1_x000D_ 1.8E-245	XP_012336564.1_x000D_ 6.4E-203	NA_x000D_	XP_012336817.1_x000D_ 1.2E-249	XP_012336338.1_x000D_ 3E-147	XP_012336338.1_x000D_ 3E-152	XP_012335860.1_x000D_ 4.5E-115	NA_x000D_	NA_x000D_	NA_x000D_	XP_012336871.1_x000D_ 1.4E-50	XP_012336865.1_x000D_ 4.6E-188	XP_012335128.1_x000D_ 2.1E-154	XP_012334598.1_x000D_ 5.2E-142	XP_012336854.1_x000D_ 1.6E-33	XP_012337482.1_x000D_ 5.8E-214	XP_012337708.1_x000D_ 4.8E-77	XP_012335332.1_x000D_ 6.4E-261	XP_012334150.1_x000D_ 3.7E-203
Haemoporida	Plasmodium	Plasmodium gaboni	XP_018643760.1_x000D_ 5.2E-162	XP_018643760.1_x000D_ 4.2E-177	SOV10169.1_x000D_ 1.9E-213	XP_018640970.1_x000D_ 3.7E-207	NA_x000D_	XP_018641744.1_x000D_ 2.9E-261	XP_018642511.1_x000D_ 1.6E-147	XP_018642511.1_x000D_ 8.7E-153	XP_018643166.1_x000D_ 9.5E-113	NA_x000D_	NA_x000D_	NA_x000D_	XP_018643760.1_x000D_ 1.1E-49	XP_018643754.1_x000D_ 3.2E-191	XP_018640479.1_x000D_ 2.7E-155	XP_018643020.1_x000D_ 2.7E-144	SOV10362.1_x000D_ 9.6E-36	XP_018640221.1_x000D_ 7.2E-216	XP_018643227.1_x000D_ 1.8E-74	XP_018640675.1_x000D_ 8.9E-269	XP_018643884.1_x000D_ 6.1E-217
Haemoporida	Plasmodium	Plasmodium gallinaceum	XP_028528190.1_x000D_ 4.6E-162	XP_028528190.1_x000D_ 5.9E-176	XP_028526417.1_x000D_ 5.8E-217	XP_028528911.1_x000D_ 2E-197	NA_x000D_	XP_028530177.1_x000D_ 1.5E-235	XP_028530998.1_x000D_ 1.8E-147	XP_028530998.1_x000D_ 5.9E-153	XP_028529070.1_x000D_ 1.6E-100	NA_x000D_	NA_x000D_	NA_x000D_	XP_028528190.1_x000D_ 1.6E-50	XP_028528196.1_x000D_ 6.6E-183	XP_028528790.1_x000D_ 3.1E-155	XP_028530658.1_x000D_ 1E-146	XP_028528207.1_x000D_ 3.6E-32	XP_028527965.1_x000D_ 3.1E-215	XP_028525882.1_x000D_ 1.6E-68	XP_028526359.1_x000D_ 8.9E-249	XP_028526121.1_x000D_ 5.8E-203
Haemoporida	Plasmodium	Plasmodium gonderi	XP_028542094.1_x000D_ 1.7E-159	XP_028542094.1_x000D_ 9.5E-178	XP_028541650.1_x000D_ 1.5E-230	XP_028543415.1_x000D_ 1.5E-185	NA_x000D_	XP_028542650.1_x000D_ 2.1E-251	XP_028541898.1_x000D_ 2.6E-147	XP_028541898.1_x000D_ 8.3E-152	XP_028543916.1_x000D_ 5E-112	NA_x000D_	NA_x000D_	NA_x000D_	XP_028542094.1_x000D_ 5.3E-50	XP_028542100.1_x000D_ 2.3E-187	XP_028545346.1_x000D_ 1.4E-152	XP_028543848.1_x000D_ 1.5E-144	XP_028542111.1_x000D_ 4.7E-34	XP_028544718.1_x000D_ 1.2E-214	XP_028543856.1_x000D_ 1.8E-75	XP_028546198.1_x000D_ 2.1E-258	XP_028541719.1_x000D_ 2.8E-200
Haemoporida	Plasmodium	Plasmodium inui San Antonio 1	XP_008816615.1_x000D_ 1E-157	XP_008816615.1_x000D_ 2.3E-174	XP_008818649.1_x000D_ 4.5E-242	XP_008817826.1_x000D_ 3E-204	NA_x000D_	XP_008818901.1_x000D_ 3.5E-251	XP_008818137.1_x000D_ 1.2E-146	XP_008818137.1_x000D_ 1.4E-153	XP_008815201.1_x000D_ 8.9E-113	NA_x000D_	NA_x000D_	NA_x000D_	XP_008816615.1_x000D_ 3.3E-51	XP_008816621.1_x000D_ 5.4E-184	XP_008818238.1_x000D_ 4.7E-154	XP_008815270.1_x000D_ 3.6E-144	XP_008816632.1_x000D_ 5.5E-33	XP_008815753.1_x000D_ 4.8E-212	XP_008815262.1_x000D_ 6.2E-77	XP_008814611.1_x000D_ 3.4E-260	XP_008818057.1_x000D_ 1.6E-200
Haemoporida	Plasmodium	Plasmodium knowlesi strain H	XP_002257933.1_x000D_ 5.1E-158	XP_002257933.1_x000D_ 2.1E-174	XP_002262362.1_x000D_ 1.7E-226	XP_002259048.1_x000D_ 3.5E-204	NA_x000D_	XP_002261884.2_x000D_ 1.2E-250	XP_002261090.1_x000D_ 2.5E-148	XP_002261090.1_x000D_ 2.5E-153	XP_002259581.1_x000D_ 6.7E-113	NA_x000D_	NA_x000D_	NA_x000D_	XP_002257933.1_x000D_ 5.9E-51	XP_002257939.1_x000D_ 2.7E-186	XP_002260528.1_x000D_ 1.2E-154	XP_002259508.1_x000D_ 2.3E-143	XP_002257950.1_x000D_ 1.6E-33	XP_002259908.1_x000D_ 7E-215	XP_002259519.1_x000D_ 9E-76	XP_002262302.1_x000D_ 6.5E-253	XP_002257762.1_x000D_ 3.4E-202
Haemoporida	Plasmodium	Plasmodium malariae	XP_028859674.1_x000D_ 3E-160	XP_028859674.1_x000D_ 2.2E-176	XP_028860132.1_x000D_ 2.4E-225	XP_028861474.1_x000D_ 5.2E-203	NA_x000D_	XP_028862249.1_x000D_ 3.9E-251	XP_028859448.1_x000D_ 3E-147	XP_028859448.1_x000D_ 9.3E-151	SBS90516.1_x000D_ 4.1E-150	NA_x000D_	NA_x000D_	NA_x000D_	SBS82423.1_x000D_ 7.2E-53	XP_028859679.1_x000D_ 1.2E-184	XP_028863511.1_x000D_ 4.1E-152	XP_028861923.1_x000D_ 2.2E-143	SBS92101.1_x000D_ 5.5E-33	SBS93368.1_x000D_ 2.4E-217	XP_028861931.1_x000D_ 3.8E-76	SBT80911.1_x000D_ 1.7E-264	SBT70258.1_x000D_ 1.4E-203
Haemoporida	Plasmodium	Plasmodium ovale	SCN43119.1_x000D_ 2.8E-162	SBT75688.1_x000D_ 2.9E-178	SCQ17103.1_x000D_ 2E-230	SCP04383.1_x000D_ 1.4E-201	NA_x000D_	SCP03990.1_x000D_ 5.1E-267	SBT75504.1_x000D_ 7.6E-147	SBT75504.1_x000D_ 6.7E-152	SBT82416.1_x000D_ 7.8E-95	NA_x000D_	NA_x000D_	NA_x000D_	SCN43119.1_x000D_ 7.3E-51	SCN43125.1_x000D_ 2.8E-188	SBT82736.1_x000D_ 9.3E-53	SBT74622.1_x000D_ 6.8E-146	SCN43136.1_x000D_ 1.6E-34	SCP05327.1_x000D_ 1.9E-215	SCQ16375.1_x000D_ 1.2E-75	SBT82563.1_x000D_ 1.7E-269	NA_x000D_
Haemoporida	Plasmodium	Plasmodium ovale wallikeri	SBT31706.1_x000D_ 2.5E-143	SBT31706.1_x000D_ 2.2E-157	SBT30593.1_x000D_ 8.1E-222	SBT34830.1_x000D_ 4.4E-57	NA_x000D_	SBT33897.1_x000D_ 4.4E-246	SBT31819.1_x000D_ 1E-125	SBT31819.1_x000D_ 2.2E-129	SBT36141.1_x000D_ 2.6E-111	NA_x000D_	NA_x000D_	NA_x000D_	SBT31706.1_x000D_ 5.9E-38	SBT35563.1_x000D_ 4.4E-151	SBT43998.1_x000D_ 1.2E-154	SBT35952.1_x000D_ 4.3E-141	SBT31770.1_x000D_ 1.8E-34	SBT40148.1_x000D_ 2.5E-215	SBT35983.1_x000D_ 1E-74	SBT48932.1_x000D_ 8.6E-268	SBT30731.1_x000D_ 4.2E-200
Haemoporida	Plasmodium	Plasmodium reichenowi	XP_012760981.2_x000D_ 5.8E-162	XP_012760981.2_x000D_ 1E-177	SOV75019.1_x000D_ 1.3E-219	XP_012763458.1_x000D_ 6E-207	NA_x000D_	CDO64796.1_x000D_ 1.7E-261	NA_x000D_	XP_012761600.1_x000D_ 5.4E-24	XP_012761743.2_x000D_ 6.4E-114	NA_x000D_	NA_x000D_	NA_x000D_	CDO62331.1_x000D_ 9.9E-50	CDO62325.1_x000D_ 1.9E-189	XP_012763901.2_x000D_ 1.6E-156	XP_012761600.1_x000D_ 2.6E-144	XP_012760964.1_x000D_ 1.2E-35	XP_012764814.1_x000D_ 1.7E-214	CDO63169.1_x000D_ 6.3E-74	CDO65509.1_x000D_ 6.4E-270	XP_012760798.2_x000D_ 5E-206
Haemoporida	Plasmodium	Plasmodium relictum	XP_028531783.1_x000D_ 2.4E-161	XP_028531783.1_x000D_ 8.3E-176	XP_028535233.1_x000D_ 1.1E-219	XP_028532929.1_x000D_ 2.1E-197	NA_x000D_	XP_028532226.1_x000D_ 2.6E-229	XP_028531627.1_x000D_ 8E-148	XP_028531627.1_x000D_ 2.8E-153	XP_028533090.1_x000D_ 5.9E-100	NA_x000D_	NA_x000D_	NA_x000D_	XP_028531783.1_x000D_ 5.1E-51	XP_028531789.1_x000D_ 4E-183	XP_028535662.1_x000D_ 2.7E-155	XP_028533589.1_x000D_ 6.1E-148	XP_028531800.1_x000D_ 1.1E-31	XP_028534645.1_x000D_ 4.4E-214	XP_028533376.1_x000D_ 2.9E-71	XP_028535175.1_x000D_ 2.4E-255	XP_028535587.1_x000D_ 2.9E-204
Haemoporida	Plasmodium	Plasmodium vinckei	CAD2097082.1_x000D_ 5.7E-160	CAD2097082.1_x000D_ 2.6E-174	CAD2114024.1_x000D_ 1.3E-204	CAD2103417.1_x000D_ 1.4E-200	NA_x000D_	CAD2099454.1_x000D_ 1.4E-236	CAD2100153.1_x000D_ 7.8E-146	CAD2100153.1_x000D_ 3.6E-152	CAD2110254.1_x000D_ 7.3E-110	NA_x000D_	NA_x000D_	NA_x000D_	CAD2097082.1_x000D_ 1.1E-49	CAD2097067.1_x000D_ 2.1E-185	CAD2109068.1_x000D_ 2.9E-50	CAD2108209.1_x000D_ 2.3E-143	CAD2097035.1_x000D_ 3.8E-33	CAD2098718.1_x000D_ 5.2E-222	NA_x000D_	CAD2113886.1_x000D_ 2.8E-266	CAD2096448.1_x000D_ 2.3E-207
Haemoporida	Plasmodium	Plasmodium vinckei brucechwatti	CAD2090357.1_x000D_ 3.9E-143	CAD2090357.1_x000D_ 2.5E-156	CAD2105383.1_x000D_ 3.8E-199	CAD2091122.1_x000D_ 8.7E-201	NA_x000D_	CAD2087274.1_x000D_ 9.8E-237	CAD2088071.1_x000D_ 1.7E-122	CAD2088071.1_x000D_ 8.1E-125	CAD2099179.1_x000D_ 1.3E-109	NA_x000D_	NA_x000D_	NA_x000D_	CAD2090357.1_x000D_ 1.5E-45	CAD2085278.1_x000D_ 4.5E-185	CAD2087671.1_x000D_ 1.8E-153	CAD2094791.1_x000D_ 2.1E-143	CAD2085245.1_x000D_ 3.7E-33	CAD2102199.1_x000D_ 2.6E-221	CAD2099359.1_x000D_ 2.7E-78	CAD2105097.1_x000D_ 5.9E-266	CAD2084562.1_x000D_ 5E-207
Haemoporida	Plasmodium	Plasmodium vinckei lentum	CAD2090366.1_x000D_ 1.1E-148	CAD2090366.1_x000D_ 5.1E-165	CAD2105232.1_x000D_ 3.3E-200	CAD2091121.1_x000D_ 1.1E-200	NA_x000D_	CAD2087246.1_x000D_ 3.8E-237	CAD2088099.1_x000D_ 2.9E-146	CAD2088099.1_x000D_ 9.9E-152	CAD2099152.1_x000D_ 3.6E-109	NA_x000D_	NA_x000D_	NA_x000D_	CAD2090366.1_x000D_ 4E-45	CAD2085220.1_x000D_ 1.4E-176	CAD2089171.1_x000D_ 2.3E-54	CAD2094810.1_x000D_ 1.7E-143	CAD2085187.1_x000D_ 3.2E-33	CAD2102326.1_x000D_ 2.3E-222	CAD2088972.1_x000D_ 4.4E-77	CAD2104950.1_x000D_ 1.3E-266	CAD2084583.1_x000D_ 3.7E-207
Haemoporida	Plasmodium	Plasmodium vinckei petteri	EUD70003.1_x000D_ 4.4E-160	EUD70003.1_x000D_ 1.6E-174	CAD2114093.1_x000D_ 1E-201	CAD2103491.1_x000D_ 6.7E-201	NA_x000D_	CAD2099271.1_x000D_ 5E-236	EUD71058.1_x000D_ 6.2E-146	EUD71058.1_x000D_ 1.4E-151	EUD72299.1_x000D_ 2.9E-109	NA_x000D_	NA_x000D_	NA_x000D_	EUD70003.1_x000D_ 1.1E-49	EUD69814.1_x000D_ 1.1E-185	EUD71190.1_x000D_ 2.6E-153	EUD73192.1_x000D_ 3.3E-143	EUD69802.1_x000D_ 5.1E-33	CAD2098330.1_x000D_ 4.6E-222	EUD72239.1_x000D_ 8.3E-78	EUD74458.1_x000D_ 4.6E-267	EUD70240.1_x000D_ 9.3E-208
Haemoporida	Plasmodium	Plasmodium vinckei vinckei	XP_008626514.1_x000D_ 2.1E-160	XP_008626514.1_x000D_ 1.6E-175	XP_008622793.2_x000D_ 2.4E-200	XP_008624605.1_x000D_ 1.4E-199	NA_x000D_	KEG01341.1_x000D_ 7.9E-248	KEG01544.1_x000D_ 2.3E-145	XP_008625511.2_x000D_ 8.6E-150	XP_008623616.2_x000D_ 3.7E-106	NA_x000D_	NA_x000D_	NA_x000D_	XP_008626514.1_x000D_ 2.3E-51	XP_008626509.1_x000D_ 5.5E-184	XP_008625381.2_x000D_ 3.2E-75	XP_008624508.1_x000D_ 1.6E-142	KEG00455.1_x000D_ 5.8E-33	XP_008622499.1_x000D_ 8.5E-223	XP_008623676.1_x000D_ 6.7E-78	XP_008622850.2_x000D_ 6E-265	XP_008626352.1_x000D_ 5.6E-206
Haemoporida	Plasmodium	Plasmodium vivax	XP_001613032.1_x000D_ 7.3E-159	VUZ93797.1_x000D_ 3.3E-176	CAG9483911.1_x000D_ 2.2E-258	XP_001615177.1_x000D_ 1.4E-204	NA_x000D_	CAG9481831.1_x000D_ 2.4E-253	VUZ93570.1_x000D_ 3E-149	VUZ93570.1_x000D_ 6.1E-154	AAU04969.1_x000D_ 3.7E-115	NA_x000D_	NA_x000D_	NA_x000D_	VUZ93797.1_x000D_ 4.1E-50	VUZ93803.1_x000D_ 9.4E-189	VUZ98076.1_x000D_ 8.9E-155	XP_001613255.1_x000D_ 6E-144	XP_001613015.1_x000D_ 2.1E-33	XP_001614224.1_x000D_ 1E-213	XP_001613666.1_x000D_ 5.1E-77	SCO69989.1_x000D_ 1.3E-264	SCO65154.1_x000D_ 5.1E-201
Haemoporida	Plasmodium	Plasmodium yoelii	XP_724389.1_x000D_ 2.6E-162	XP_724389.1_x000D_ 6.1E-177	XP_725434.2_x000D_ 3.8E-196	XP_022812292.1_x000D_ 1.7E-202	NA_x000D_	XP_022811701.1_x000D_ 2.3E-252	XP_725558.1_x000D_ 3.1E-144	XP_725558.1_x000D_ 7.9E-148	XP_730446.1_x000D_ 1.5E-109	NA_x000D_	NA_x000D_	NA_x000D_	XP_724389.1_x000D_ 5.3E-51	XP_022811448.1_x000D_ 6.8E-185	XP_724576.1_x000D_ 3.8E-154	XP_723895.1_x000D_ 1.3E-144	XP_022811443.1_x000D_ 4.7E-33	XP_726810.2_x000D_ 7.8E-222	XP_022812747.1_x000D_ 5E-77	CDU20752.1_x000D_ 3.1E-259	XP_728969.2_x000D_ 8.2E-205
Haemoporida	Plasmodium	Plasmodium yoelii 17X	ETB57119.1_x000D_ 9.9E-160	ETB57119.1_x000D_ 4.5E-172	ETB61794.1_x000D_ 1.9E-195	ETB57960.1_x000D_ 2.9E-193	NA_x000D_	ETB58819.1_x000D_ 3.4E-252	NA_x000D_	ETB62528.1_x000D_ 3.1E-18	ETB62447.1_x000D_ 1.5E-109	NA_x000D_	NA_x000D_	NA_x000D_	ETB57119.1_x000D_ 5.5E-51	ETB57111.1_x000D_ 3.4E-185	ETB58659.1_x000D_ 2E-55	ETB62528.1_x000D_ 2.5E-139	ETB57098.1_x000D_ 7.5E-34	NA_x000D_	ETB62518.1_x000D_ 8.8E-78	ETB61717.1_x000D_ 1.4E-258	ETB60642.1_x000D_ 1E-204
Haemoporida	Apicomonda	Chromera velia CCMP2878	(Cvel_18867)_x000D_ 5.03E-28	(Cvel_10944)_x000D_ 2.52E-88	(Cvel_8715.t1-p1)_x000D_ 5.95E-48	(Cvel_23700.t1-p1)_x000D_ 4.95E-101	(Cvel_25383.t1-p1)_x000D_ 1.7E-11	(Cvel_12118.t1-p1)_x000D_ 7.13E-71	(Cvel_28790.t1-p1)_x000D_ 1.29E-77	(Cvel_1048.t1-p1)_x000D_ 7.96E-79	(Cvel_16523.t1-p1)_x000D_ 3.74E-11	NA_x000D_	NA_x000D_	NA_x000D_	(Cvel_18867.t1-p1)_x000D_ 5.47E-11	(Cvel_24042.t1-p1)_x000D_ 4.74E-93	(Cvel_744.t1-p1)_x000D_ 8.21E-56	(Cvel_14977.t1-p1)_x000D_ 3.36E-104	(Cvel_32060.t1-p1)_x000D_ 1.51E-23	(Cvel_3285.t1-p1)_x000D_ 1.18E-149	(Cvel_929.t1-p1)_x000D_ 9.69E-14	Cvel_22411.t1-p1_x000D_ 2.14E-153	(Cvel_2579.t1-p1)_x000D_ 2.04E-116
Haemoporida	Apicomonda	Vitrella brassicaformis CCMP3155	CEM02339.1_x000D_ 6.9E-170	CEM02339.1_x000D_ 3.1E-185	CEL92545.1_x000D_ 0	CEM24414.1_x000D_ 1.1E-206	CEL93554.1_x000D_ 1.6E-135	CEL99644.1_x000D_ 1.1E-284	CEM38521.1_x000D_ 8.5E-159	CEM07800.1_x000D_ 7.5E-180	CEL93709.1_x000D_ 1.5E-124	CEM05823.1_x000D_ 9.1E-132	CEM39528.1_x000D_ 1E-109	CEM01683.1_x000D_ 1.3E-97	CEL93328.1_x000D_ 2.3E-79	CEM02439.1_x000D_ 8.2E-274	CEM39465.1_x000D_ 4.3E-150	CEM04483.1_x000D_ 1.2E-162	CEM12831.1_x000D_ 2.2E-43	CEM03186.1_x000D_ 4.3E-205	CEL93296.1_x000D_ 7.7E-86	CEM01585.1_x000D_ 0	CEM10222.1_x000D_ 3.8E-207
Conoidasida	Conccidia	Cryptosporidium andersoni	OII75628.1_x000D_ 1.8E-133	OII76283.1_x000D_ 1.8E-134	OII75961.1_x000D_ 2.2E-231	OII76572.1_x000D_ 2.8E-135	NA_x000D_	OII76773.1_x000D_ 5.4E-228	OII75208.1_x000D_ 1.1E-19	OII75208.1_x000D_ 4.9E-38	OII71068.1_x000D_ 3.5E-138	NA_x000D_	OII74440.1_x000D_ 1.2E-84	NA_x000D_	NA_x000D_	NA_x000D_	OII76086.1_x000D_ 3.8E-158	NA_x000D_	OII77756.1_x000D_ 9.8E-14	NA_x000D_	NA_x000D_	OII76327.1_x000D_ 9.1E-115	NA_x000D_
Conoidasida	Conccidia	Cryptosporidium bovis	KAH7650388.1_x000D_ 2.1E-113	KAH7647912.1_x000D_ 2.2E-130	KAH7650002.1_x000D_ 9.3E-232	NA_x000D_	NA_x000D_	KAH7649218.1_x000D_ 9.3E-223	KAH7650025.1_x000D_ 4.1E-30	KAH7648618.1_x000D_ 5.7E-51	KAH7648206.1_x000D_ 2.6E-141	NA_x000D_	KAH7648578.1_x000D_ 8E-87	NA_x000D_	NA_x000D_	NA_x000D_	KAH7649346.1_x000D_ 1.2E-54	KAH7648163.1_x000D_ 1.6E-09	KAH7647581.1_x000D_ 1.4E-55	NA_x000D_	NA_x000D_	KAH7650558.1_x000D_ 6.5E-121	NA_x000D_
Conoidasida	Conccidia	Cryptosporidium felis	KAF7459066.1_x000D_ 5.8E-105	KAF7459066.1_x000D_ 2.4E-103	KAF7458313.1_x000D_ 3E-229	NA_x000D_	NA_x000D_	KAF7458487.1_x000D_ 8.7E-223	KAF7458332.1_x000D_ 2.9E-28	KAF7457978.1_x000D_ 1E-62	KAF7456900.1_x000D_ 1.3E-139	NA_x000D_	KAF7456635.1_x000D_ 7.3E-53	NA_x000D_	NA_x000D_	NA_x000D_	KAF7458325.1_x000D_ 5.9E-149	NA_x000D_	KAF7455708.1_x000D_ 5.6E-12	NA_x000D_	NA_x000D_	KAF7456067.1_x000D_ 1.5E-118	NA_x000D_
Conoidasida	Conccidia	Cryptosporidium hominis	OLQ17263.1_x000D_ 1.5E-134	OLQ17263.1_x000D_ 4.8E-148	OLQ16857.1_x000D_ 4.2E-243	NA_x000D_	NA_x000D_	CUV06475.1_x000D_ 6.5E-238	OLQ16837.1_x000D_ 1.9E-30	OLQ16236.1_x000D_ 2E-75	PPS97594.1_x000D_ 3.8E-145	NA_x000D_	OLQ17679.1_x000D_ 1E-93	NA_x000D_	NA_x000D_	NA_x000D_	OLQ19413.1_x000D_ 1.3E-56	NA_x000D_	PPS96212.1_x000D_ 1.6E-85	NA_x000D_	NA_x000D_	OLQ17303.1_x000D_ 1.1E-126	NA_x000D_
Conoidasida	Conccidia	Cryptosporidium hominis TU502	XP_665259.1_x000D_ 4.4E-58	XP_665259.1_x000D_ 4.2E-64	XP_667038.1_x000D_ 3.5E-243	NA_x000D_	NA_x000D_	XP_664886.1_x000D_ 2.3E-20	XP_666501.1_x000D_ 1.7E-30	XP_666589.1_x000D_ 8.6E-76	XP_667122.1_x000D_ 4.1E-145	NA_x000D_	XP_667978.1_x000D_ 1.4E-45	NA_x000D_	NA_x000D_	NA_x000D_	XP_666788.1_x000D_ 3E-157	NA_x000D_	XP_665783.1_x000D_ 2.5E-44	NA_x000D_	NA_x000D_	XP_665482.1_x000D_ 4.4E-127	NA_x000D_
Conoidasida	Conccidia	Cryptosporidium meleagridis	POM83625.1_x000D_ 2.5E-122	POM83625.1_x000D_ 6.1E-140	POM83800.1_x000D_ 3.6E-241	NA_x000D_	NA_x000D_	POM85479.1_x000D_ 4.1E-237	POM85587.1_x000D_ 8E-31	POM85343.1_x000D_ 7.6E-75	POM83089.1_x000D_ 2.6E-147	NA_x000D_	POM84223.1_x000D_ 9E-93	NA_x000D_	NA_x000D_	NA_x000D_	POM85580.1_x000D_ 7.8E-154	NA_x000D_	POM83719.1_x000D_ 4.9E-69	NA_x000D_	NA_x000D_	POM83216.1_x000D_ 1.8E-126	NA_x000D_
Conoidasida	Conccidia	Cryptosporidium muris RN66	XP_002141415.1_x000D_ 1.6E-134	XP_002140924.1_x000D_ 2.3E-137	XP_002140857.1_x000D_ 8.9E-230	XP_002141574.1_x000D_ 2.2E-136	NA_x000D_	XP_002140115.1_x000D_ 3E-221	XP_002140837.1_x000D_ 1.4E-19	XP_002141934.1_x000D_ 6.3E-37	XP_002142758.1_x000D_ 4.1E-138	NA_x000D_	XP_002142109.1_x000D_ 9.8E-84	NA_x000D_	NA_x000D_	NA_x000D_	XP_002140845.1_x000D_ 4E-158	NA_x000D_	XP_002140396.1_x000D_ 4.4E-49	NA_x000D_	NA_x000D_	XP_002140968.1_x000D_ 8.9E-115	NA_x000D_
Conoidasida	Conccidia	Cryptosporidium parvum Iowa II	XP_625645.1_x000D_ 5.7E-134	XP_625645.1_x000D_ 3.1E-148	XP_625377.1_x000D_ 1.8E-242	NA_x000D_	NA_x000D_	XP_001388299.1_x000D_ 2.7E-190	XP_626295.1_x000D_ 7.9E-31	XP_626468.1_x000D_ 1.6E-75	XP_627845.1_x000D_ 1E-145	NA_x000D_	XP_628204.1_x000D_ 1.4E-45	NA_x000D_	NA_x000D_	NA_x000D_	XP_626289.1_x000D_ 3.1E-157	NA_x000D_	XP_625875.1_x000D_ 1.6E-83	NA_x000D_	NA_x000D_	XP_625680.1_x000D_ 1.3E-126	NA_x000D_
Conoidasida	Conccidia	Cryptosporidium ryanae	KAH8741745.1_x000D_ 1.9E-112	KAH8741745.1_x000D_ 9.9E-130	KAH8740136.1_x000D_ 0	NA_x000D_	NA_x000D_	KAH8740853.1_x000D_ 6.8E-225	KAH8740156.1_x000D_ 3.8E-28	KAH8740922.1_x000D_ 1.2E-53	KAH8741243.1_x000D_ 2.8E-141	NA_x000D_	KAH8739857.1_x000D_ 1E-93	NA_x000D_	NA_x000D_	NA_x000D_	KAH8740150.1_x000D_ 8.2E-139	NA_x000D_	KAH8738871.1_x000D_ 5.9E-29	NA_x000D_	NA_x000D_	KAH8741791.1_x000D_ 1.6E-120	NA_x000D_
Conoidasida	Conccidia	Cryptosporidium sp. chipmunk genotype I	KAH8585196.1_x000D_ 8E-125	KAH8585196.1_x000D_ 8.2E-141	KAH8581861.1_x000D_ 9.6E-239	NA_x000D_	NA_x000D_	KAH8581558.1_x000D_ 1.2E-233	KAH8581874.1_x000D_ 1.3E-31	KAH8581637.1_x000D_ 5.1E-70	KAH8582226.1_x000D_ 2.7E-145	NA_x000D_	KAH8585166.1_x000D_ 5.5E-44	NA_x000D_	NA_x000D_	NA_x000D_	KAH8581866.1_x000D_ 1.2E-153	NA_x000D_	KAH8584212.1_x000D_ 2.1E-50	NA_x000D_	NA_x000D_	KAH8585243.1_x000D_ 1.2E-120	NA_x000D_
Conoidasida	Conccidia	Cryptosporidium tyzzeri	TRY52250.1_x000D_ 1E-133	TRY52250.1_x000D_ 2.2E-147	TRY52913.1_x000D_ 7.4E-241	NA_x000D_	NA_x000D_	TRY50997.1_x000D_ 7.5E-238	TRY52745.1_x000D_ 1.3E-30	TRY52777.1_x000D_ 1.2E-73	TRY51337.1_x000D_ 7.8E-146	NA_x000D_	TRY50804.1_x000D_ 1E-95	NA_x000D_	NA_x000D_	NA_x000D_	TRY52740.1_x000D_ 3.8E-157	NA_x000D_	TRY52200.1_x000D_ 3.5E-84	NA_x000D_	NA_x000D_	TRY52237.1_x000D_ 1.5E-126	NA_x000D_
Conoidasida	Conccidia	Cryptosporidium ubiquitum	XP_028873289.1_x000D_ 8.2E-126	XP_028873289.1_x000D_ 9.4E-140	XP_028873920.1_x000D_ 4.3E-238	NA_x000D_	NA_x000D_	XP_028874307.1_x000D_ 1.6E-230	XP_028873940.1_x000D_ 1.3E-30	XP_028873456.1_x000D_ 6.9E-73	XP_028874784.1_x000D_ 5.6E-142	NA_x000D_	XP_028875098.1_x000D_ 1.5E-85	NA_x000D_	NA_x000D_	NA_x000D_	XP_028873933.1_x000D_ 2.2E-151	NA_x000D_	XP_028873691.1_x000D_ 1.2E-66	NA_x000D_	NA_x000D_	XP_028873863.1_x000D_ 5.4E-123	NA_x000D_
Conoidasida	Conccidia	Besnoitia besnoiti	XP_029219429.1_x000D_ 2.7E-209	XP_029222491.1_x000D_ 1.2E-201	XP_029215789.1_x000D_ 0	XP_029217898.1_x000D_ 1E-259	XP_029218114.1_x000D_ 0	XP_029218934.1_x000D_ 3.5E-274	XP_029215923.1_x000D_ 2.9E-189	XP_029220780.1_x000D_ 1.1E-162	XP_029219102.1_x000D_ 0	XP_029215974.1_x000D_ 1.5E-259	XP_029220029.1_x000D_ 8.3E-286	XP_029215945.1_x000D_ 1.1E-188	XP_029221826.1_x000D_ 1.4E-284	XP_029220637.1_x000D_ 0	XP_029215426.1_x000D_ 2.4E-191	XP_029217300.1_x000D_ 2.1E-194	XP_029221685.1_x000D_ 2E-56	XP_029219142.1_x000D_	XP_029218763.1_x000D_ 5.7E-210	XP_029217856.1_x000D_ 0	XP_029219054.1_x000D_ 6.8E-267
Conoidasida	Conccidia	Cyclospora cayetanensis	XP_026190526.1_x000D_ 6.8E-189	XP_026190526.1_x000D_ 7.7E-159	OEH78265.1_x000D_ 0	XP_026189700.1_x000D_ 1.1E-195	XP_026191999.1_x000D_ 1.3E-286	OEH78053.1_x000D_ 2.3E-45	OEH74690.1_x000D_ 6.4E-110	OEH74690.1_x000D_ 2.1E-118	XP_026190579.1_x000D_ 1.6E-208	XP_022592047.2_x000D_ 1.9E-156	OEH80026.1_x000D_ 1.5E-137	XP_026191555.1_x000D_ 5.4E-123	NA_x000D_	XP_026192056.1_x000D_ 3.5E-233	XP_026192697.1_x000D_ 2.6E-173	XP_026189831.1_x000D_ 1.2E-171	OEH80087.1_x000D_ 2.7E-70	XP_026190304.1_x000D_	XP_026194081.1_x000D_ 2.4E-106	OEH79596.1_x000D_ 5.6E-273	XP_026190173.1_x000D_ 1E-196
Conoidasida	Conccidia	Cystoisospora suis	PHJ15995.1_x000D_ 2.2E-178	PHJ16493.1_x000D_ 3.8E-197	PHJ22762.1_x000D_ 3.2E-273	PHJ21845.1_x000D_ 1.5E-181	PHJ18043.1_x000D_ 0	PHJ22804.1_x000D_ 8E-240	PHJ15098.1_x000D_ 6.9E-173	PHJ15098.1_x000D_ 1.7E-140	PHJ17607.1_x000D_ 1.3E-296	PHJ22534.1_x000D_ 0	PHJ17027.1_x000D_ 0	PHJ24655.1_x000D_ 2.9E-172	PHJ26093.1_x000D_ 5.1E-224	PHJ17691.1_x000D_ 2.8E-268	PHJ23115.1_x000D_ 1.4E-177	PHJ20225.1_x000D_ 6.3E-192	PHJ15851.1_x000D_ 3.7E-77	PHJ24681.1_x000D_	PHJ15960.1_x000D_ 2.6E-146	PHJ25262.1_x000D_ 0	PHJ25431.1_x000D_ 4E-219
Conoidasida	Conccidia	Eimeria acervulina	XP_013246769.1_x000D_ 1.4E-189	XP_013246769.1_x000D_ 1.1E-154	XP_013252378.1_x000D_ 1.2E-196	XP_013249642.1_x000D_ 4.5E-164	XP_013249000.1_x000D_ 1.2E-47	NA_x000D_	XP_013250970.1_x000D_ 5.3E-82	XP_013250970.1_x000D_ 3.7E-83	XP_013248356.1_x000D_ 9E-202	XP_013248828.1_x000D_ 8.7E-61	XP_013249841.1_x000D_ 3.8E-84	XP_013251034.1_x000D_ 1.4E-118	NA_x000D_	XP_013250158.1_x000D_ 8.4E-183	XP_013253040.1_x000D_ 2.4E-94	NA_x000D_	XP_013248526.1_x000D_ 4.7E-66	XP_013251904.1_x000D_	XP_013246924.1_x000D_ 1.9E-112	XP_013249723.1_x000D_ 6.6E-226	XP_013247214.1_x000D_ 5.8E-40
Conoidasida	Conccidia	Eimeria brunetti	CDJ47204.1_x000D_ 3.6E-184	CDJ47204.1_x000D_ 6.9E-162	CDJ50369.1_x000D_ 1.1E-302	CDJ46132.1_x000D_ 1.5E-92	CDJ51491.1_x000D_ 2.6E-115	CDJ50241.1_x000D_ 8.3E-34	CDJ50436.1_x000D_ 2.4E-51	CDJ50436.1_x000D_ 2.5E-41	CDJ50408.1_x000D_ 8.4E-197	CDJ47743.1_x000D_ 1.9E-48	CDJ46063.1_x000D_ 7.8E-55	NA_x000D_	NA_x000D_	CDJ50428.1_x000D_ 3.3E-140	CDJ48145.1_x000D_ 5.5E-53	CDJ52207.1_x000D_ 1.3E-100	CDJ53564.1_x000D_ 1E-41	CDJ53890.1_x000D_	CDJ53827.1_x000D_ 4.8E-53	CDJ47593.1_x000D_ 2.3E-148	CDJ50202.1_x000D_ 1.4E-143
Conoidasida	Conccidia	Eimeria maxima	XP_013333502.1_x000D_ 1E-152	XP_013333502.1_x000D_ 4E-126	XP_013333144.1_x000D_ 3.2E-152	XP_013332775.1_x000D_ 9.1E-51	XP_013336220.1_x000D_ 8.7E-49	XP_013332791.1_x000D_ 1.3E-88	NA_x000D_	NA_x000D_	XP_013332694.1_x000D_ 1.2E-199	XP_013334337.1_x000D_ 5.9E-114	XP_013336666.1_x000D_ 7.9E-34	NA_x000D_	NA_x000D_	XP_013335873.1_x000D_ 5.6E-140	XP_013338464.1_x000D_ 1.1E-55	NA_x000D_	XP_013334912.1_x000D_ 7.2E-16	XP_013335404.1_x000D_	NA_x000D_	XP_013335761.1_x000D_ 2.7E-101	XP_013332769.1_x000D_ 1.5E-192
Conoidasida	Conccidia	Eimeria mitis	XP_013353487.1_x000D_ 3.5E-114	XP_013353487.1_x000D_ 3.6E-88	XP_013356680.1_x000D_ 6.7E-99	NA_x000D_	XP_013351037.1_x000D_ 1.2E-65	NA_x000D_	NA_x000D_	NA_x000D_	XP_013356161.1_x000D_ 1.6E-172	XP_013351910.1_x000D_ 8.4E-93	XP_013353751.1_x000D_ 2.1E-36	XP_013350352.1_x000D_ 6.8E-30	NA_x000D_	XP_037878762.1_x000D_ 4.9E-11	XP_037878775.1_x000D_ 1.3E-55	NA_x000D_	XP_037878241.1_x000D_ 1.1E-19	XP_037878648.1_x000D_	XP_013351418.1_x000D_ 1.7E-57	XP_013351539.1_x000D_ 2.4E-105	NA_x000D_
Conoidasida	Conccidia	Eimeria necatrix	XP_013437077.1_x000D_ 1.5E-176	XP_013437077.1_x000D_ 6.8E-146	XP_013439419.1_x000D_ 1E-144	XP_013438131.1_x000D_ 3.5E-62	XP_013434114.1_x000D_ 1.3E-298	XP_013439026.1_x000D_ 1.9E-39	XP_013435312.1_x000D_ 2E-120	XP_013435312.1_x000D_ 1.7E-113	XP_013435334.1_x000D_ 5.5E-229	XP_013434027.1_x000D_ 6E-150	XP_013439783.1_x000D_ 1.3E-68	XP_013435043.1_x000D_ 1.8E-82	NA_x000D_	XP_013436783.1_x000D_ 7.5E-185	XP_013434006.1_x000D_ 5.8E-71	XP_013434899.1_x000D_ 2E-152	NA_x000D_	XP_013440792.1_x000D_ 2.7E-41	NA_x000D_	XP_013433586.1_x000D_ 3.2E-285	XP_013437121.1_x000D_ 8.4E-165
Conoidasida	Conccidia	Eimeria praecox	CDI87048.1_x000D_ 4.6E-190	CDI87048.1_x000D_ 7.8E-159	CDI87060.1_x000D_ 1.6E-125	NA_x000D_	CDI84773.1_x000D_ 8.8E-42	NA_x000D_	NA_x000D_	NA_x000D_	CDI74790.1_x000D_ 1.7E-166	NA_x000D_	CDI84829.1_x000D_ 9.1E-56	NA_x000D_	NA_x000D_	CDI82783.1_x000D_ 5E-184	CDI87405.1_x000D_ 5.1E-53	NA_x000D_	CDI87661.1_x000D_ 1.1E-19	CDI83005.1_x000D_ 1.2E-53	CDI86206.1_x000D_ 1.7E-17	CDI75926.1_x000D_ 1.7E-99	NA_x000D_
Conoidasida	Conccidia	Eimeria tenella	XP_013227882.1_x000D_ 2.8E-182	XP_013227882.1_x000D_ 7.5E-151	XP_013227966.1_x000D_ 1.1E-188	XP_013231426.1_x000D_ 9.8E-63	XP_013233675.1_x000D_ 1.9E-291	XP_013231989.1_x000D_ 5.6E-68	XP_013229816.1_x000D_ 7.4E-128	XP_013229816.1_x000D_ 1.4E-116	XP_013227846.1_x000D_ 3.1E-137	XP_013229487.1_x000D_ 1.6E-148	XP_013232190.1_x000D_ 2.3E-72	XP_013234747.1_x000D_ 1E-154	NA_x000D_	XP_013232132.1_x000D_ 1.7E-183	XP_013232378.1_x000D_ 3.1E-169	XP_013229257.1_x000D_ 8E-89	XP_013228479.1_x000D_ 1.6E-66	XP_013235318.1_x000D_	XP_013230740.1_x000D_ 9.5E-49	XP_013228932.1_x000D_ 0	XP_013233161.1_x000D_ 1.5E-172
Conoidasida	Conccidia	Neospora caninum Liverpool	XP_003880192.1_x000D_ 2.4E-243	XP_003883574.1_x000D_ 1.1E-205	CEL64397.1_x000D_ 0	CEL69678.1_x000D_ 7E-258	CEL69805.1_x000D_ 0	XP_003885622.1_x000D_ 5.9E-274	CEL64521.1_x000D_ 4E-230	CEL68156.1_x000D_ 4.4E-178	CEL68889.1_x000D_ 0	XP_003881296.1_x000D_ 0	XP_003881411.1_x000D_ 0	CEL64537.1_x000D_ 5.9E-205	XP_003882764.1_x000D_ 0	XP_003880991.1_x000D_ 0	XP_003886301.1_x000D_ 8.8E-193	XP_003882864.1_x000D_ 6.1E-195	XP_003882642.1_x000D_ 2.4E-91	CEL68925.1_x000D_	CEL65599.1_x000D_ 5E-249	CEL64601.1_x000D_ 0	CEL68842.1_x000D_ 0
Conoidasida	Conccidia	Toxoplasma gondii ME49	XP_018638348.1_x000D_ 0	XP_018636776.1_x000D_ 0	XP_018638494.1_x000D_ 0	XP_018635609.1_x000D_ 0	XP_002364352.1_x000D_ 0	XP_002370904.1_x000D_ 0	XP_002369743.1_x000D_ 0	XP_002368754.1_x000D_ 0	XP_018636044.1_x000D_ 0	XP_002368536.2_x000D_ 0	XP_002371900.1_x000D_ 0	XP_002371700.1_x000D_ 0	XP_018637129.1_x000D_ 0	XP_018636319.1_x000D_ 0	XP_002370602.1_x000D_ 0	XP_002365260.1_x000D_ 0	XP_002365498.1_x000D_ 0	XP_002366293.1_x000D_ 0	XP_018637793.1_x000D_ 0	XP_018638261.1_x000D_ 0	XP_002366385.2_x000D_ 0
Conoidasida	Eugregarinorida	Gregarina niphandrodes	NA_x000D_	NA_x000D_	XP_011128977.1_x000D_ 2.6E-227	NA_x000D_	NA_x000D_	XP_011130318.1_x000D_ 1E-80	XP_011130672.1_x000D_ 1.4E-25	XP_011130672.1_x000D_ 1.8E-33	XP_011131336.1_x000D_ 5.2E-131	NA_x000D_	XP_011129505.1_x000D_ 2.7E-10	NA_x000D_	NA_x000D_	XP_011131487.1_x000D_ 1.3E-62	NA_x000D_	NA_x000D_	NA_x000D_	NA_x000D_	NA_x000D_	XP_011132560.1_x000D_ 1.7E-90	NA_x000D_
Bacteria	Alpha-Proteobacteria	Rhodopseudomonas palustris BisB5	(ABE40845.1)_x000D_ 2.9E-41	(ABE40531.1)_x000D_ 2.3E-61	ABE38845.1_x000D_ 8E-15	NA_x000D_	NA_x000D_	(ABE37323.1)_x000D_ 1.4E-35	NA_x000D_	NA_x000D_	(ABE38187.1)_x000D_ 5E-18	NA_x000D_	NA_x000D_	NA_x000D_	NA_x000D_	NA_x000D_	NA_x000D_	NA_x000D_	NA_x000D_	(Q137C6.1)_x000D_ 4E-64	NA_x000D_	ABE39825.1_x000D_ 3E-106	(ABE40793.1)_x000D_ 2E-82
Bacteria	Alpha-Proteobacteria	Rhodospirillum rubrum	(WP_200289893.1)_x000D_ 7E-28	(WP_200289893.1)_x000D_ 3.4E-43	MBK5956528.1_x000D_ 6E-12	NA_x000D_	NA_x000D_	(WP_011387908.1)_x000D_ 5.1E-34	NA_x000D_	NA_x000D_	(WP_011388633.1)_x000D_ 4E-15	NA_x000D_	NA_x000D_	NA_x000D_	NA_x000D_	NA_x000D_	NA_x000D_	NA_x000D_	(WP_011388176.1)_x000D_ 3E-22	(WP_200296673.1)_x000D_ 5E-70	NA_x000D_	MBK1663544.1_x000D_ 3E-110	(MBK1665424.1)_x000D_ 4E-93
Bacteria	Alpha-Proteobacteria	Magnetospirillum gryphiswaldense	(WP_106001463.1) 1.2E-89	(WP_024079986.1)_x000D_ 6E-08	WP_024081724.1_x000D_ 1E-16	NA_x000D_	NA_x000D_	(WP_024081393.1)_x000D_ 4.8E-36	NA_x000D_	NA_x000D_	(WP_024080036.1)_x000D_ 8E-19	NA_x000D_	NA_x000D_	NA_x000D_	NA_x000D_	NA_x000D_	NA_x000D_	NA_x000D_	(MBI2241505.1)_x000D_ 7E-22	(MBI2240682.1)_x000D_ 8E-74	NA_x000D_	MBI2241311.1_x000D_ 2E-108	(WP_024081041.1)_x000D_ 4E-81
Bacteria	Alpha-Proteobacteria	Rhodobacter capsulatus	(WP_013066000.1)_x000D_ 1.6E-40	(WP_023922384.1)_x000D_ 4.5E-43	WP_136905667.1_x000D_ 4E-15	NA_x000D_	NA_x000D_	NA_x000D_	NA_x000D_	NA_x000D_	(WP_023921716.1)_x000D_ 8E-16	NA_x000D_	NA_x000D_	NA_x000D_	NA_x000D_	NA_x000D_	NA_x000D_	NA_x000D_	(WP_055208257.1)_x000D_ 1.8E-10	(WP_023921519.1)_x000D_ 4E-68	NA_x000D_	WP_031321252.1_x000D_ 9E-104	(WP_080514704.1)_x000D_ 1E-77
Bacteria	Alpha-Proteobacteria	Ruegeria denitrificans	(WP_058281538.1)_x000D_ 2.2E-37	(WP_058281538.1)_x000D_ 1E-32	(WP_058282677.1)_x000D_ 6.1E-76	NA_x000D_	NA_x000D_	NA_x000D_	NA_x000D_	NA_x000D_	(WP_058281009.1)_x000D_ 3.9E-120	NA_x000D_	NA_x000D_	NA_x000D_	NA_x000D_	NA_x000D_	NA_x000D_	NA_x000D_	(WP_058281252.1)_x000D_ 7.2E-13	(WP_058281486.1)_x000D_ 4.5E-170	NA_x000D_	WP_243470704.1_x000D_ 0	NA_x000D_
Bacteria	Beta-Proteobacteria	Dechloromonas denitrificans	(WP_226418191.1)_x000D_ 3.1E-102	(WP_226418191.1)_x000D_ 1E-08	WP_226418169.1_x000D_ 1E-12	NA_x000D_	NA_x000D_	(WP_066882212.1)_x000D_ 9.7E-64	NA_x000D_	NA_x000D_	(WP_226406553.1)_x000D_ 4E-15	NA_x000D_	NA_x000D_	NA_x000D_	NA_x000D_	NA_x000D_	NA_x000D_	NA_x000D_	(WP_226417767.1)_x000D_ 9.6E-10	(WP_066882905.1)_x000D_ 1E-65	NA_x000D_	WP_226405501.1_x000D_ 1E-103	(WP_066880710.1)_x000D_ 5E-96
Bacteria	Beta-Proteobacteria	Polaromonas glacialis	(WP_029525442.1)_x000D_ 7.6E-13	(WP_029525442.1)_x000D_ 3.7E-54	WP_051675712.1_x000D_ 4E-13	NA_x000D_	NA_x000D_	NA_x000D_	NA_x000D_	NA_x000D_	(WP_029525021.1)_x000D_ 7E-122	NA_x000D_	NA_x000D_	NA_x000D_	NA_x000D_	NA_x000D_	NA_x000D_	NA_x000D_	NA_x000D_	(WP_029526519.1)_x000D_ 7E-64	NA_x000D_	WP_029523961.1_x000D_ 7E-294	(WP_036772131.1)_x000D_ 7E-94
Bacteria	Beta-Proteobacteria	Polaromonas vacuolata	(WP_168922333.1)_x000D_ 1.7E-13	(WP_168921191.1)_x000D_ 2E-08	(WP_168923025.1)_x000D_ 7.3E-76	NA_x000D_	NA_x000D_	(QJC54844.1)_x000D_ 1.1E-60	NA_x000D_	NA_x000D_	(WP_168922724.1)_x000D_ 2.4E-118	NA_x000D_	NA_x000D_	NA_x000D_	NA_x000D_	NA_x000D_	NA_x000D_	NA_x000D_	(WP_168923526.1)_x000D_ 1.2E-09	(WP_168920848.1)_x000D_ 4E-63	NA_x000D_	WP_168922331.1_x000D_ 9.5E-287	NA_x000D_
Bacteria	Beta-Proteobacteria	Rhodoferax ferrireducens	(OQW87203.1)_x000D_ 5.8E-69	(OQW87203.1)_x000D_ 9E-15	(WP_244095830.1)_x000D_ 1.8E-80	NA_x000D_	NA_x000D_	(WP_232834426.1)_x000D_ 1.3E-61	NA_x000D_	NA_x000D_	(OQW90191.1)_x000D_ 1.1E-116	NA_x000D_	NA_x000D_	NA_x000D_	NA_x000D_	NA_x000D_	NA_x000D_	NA_x000D_	(WP_011464030.1)_x000D_ 2E-22	(WP_232834306.1)_x000D_ 7E-63	NA_x000D_	OQW89859.1_x000D_ 1E-103	(WP_114973780.1)_x000D_ 5.5E-165
Bacteria	Beta-Proteobacteria	Thiobacillus denitrificans	(WP_059759276.1)_x000D_ 1.4E-12	(WP_059759276.1)_x000D_ 1.8E-17	WP_059754072.1_x000D_ 1E-13	NA_x000D_	NA_x000D_	(WP_194291280.1)_x000D_ 1.8E-55	NA_x000D_	NA_x000D_	(WP_011310664.1)_x000D_ 2E-15	NA_x000D_	NA_x000D_	NA_x000D_	NA_x000D_	NA_x000D_	NA_x000D_	NA_x000D_	(WP_011312060.1)_x000D_ 2E-22	(WP_018076974.1)_x000D_ 6E-63	NA_x000D_	WP_018076564.1_x000D_ 4E-103	(WP_018076496.1)_x000D_ 1E-101
Bacteria	Gamma-Proteobacteria	Dyella nitratireducens	(WP_188792652.1)_x000D_ 2.6E-17	(WP_188798116.1)_x000D_ 7.9E-20	(WP_188798521.1)_x000D_ 2.1E-36	NA_x000D_	NA_x000D_	NA_x000D_	NA_x000D_	NA_x000D_	(GGA16645.1)_x000D_ 2.6E-111	NA_x000D_	NA_x000D_	NA_x000D_	NA_x000D_	NA_x000D_	NA_x000D_	NA_x000D_	(WP_188795900.1)_x000D_ 1.9E-12	NA_x000D_	NA_x000D_	NA_x000D_	NA_x000D_
Bacteria	Gamma-Proteobacteria	Halothiobacillus neapolitanus	(WP_012823547.1)_x000D_ 2.3E-12	(WP_012824176.1)_x000D_ 6E-08	WP_012824584.1_x000D_ 7E-09	NA_x000D_	NA_x000D_	NA_x000D_	NA_x000D_	NA_x000D_	(WP_012823932.1)_x000D_ 2E-15	NA_x000D_	NA_x000D_	NA_x000D_	NA_x000D_	NA_x000D_	NA_x000D_	NA_x000D_	(WP_012824778.1)_x000D_ 2E-22	(WP_041600812.1)_x000D_ 2E-66	NA_x000D_	WP_012824207.1_x000D_ 2E-107	(WP_012825075.1)_x000D_ 2E-78
Bacteria	Gamma-Proteobacteria	Hydrogenovibrio marinus	(WP_029912583.1)_x000D_ 3.5E-61	(WP_029912583.1)_x000D_ 4E-11	WP_155837663.1_x000D_ 6E-11	NA_x000D_	NA_x000D_	NA_x000D_	NA_x000D_	NA_x000D_	(WP_029909250.1)_x000D_ 9E-16	NA_x000D_	NA_x000D_	NA_x000D_	NA_x000D_	NA_x000D_	NA_x000D_	NA_x000D_	(WP_029909872.1)_x000D_ 5E-23	(WP_029912877.1)_x000D_ 4E-64	NA_x000D_	WP_029908939.1_x000D_ 1E-104	NA_x000D_
Bacteria	Gamma-Proteobacteria	Pantoea anthophila	(WP_046102393.1)_x000D_ 2.5E-63	(WP_046102393.1)_x000D_ 7.5E-80	(WP_140922999.1)_x000D_ 1.7E-90	NA_x000D_	NA_x000D_	NA_x000D_	NA_x000D_	NA_x000D_	(WP_046100703.1)_x000D_ 8.8E-118	NA_x000D_	NA_x000D_	NA_x000D_	NA_x000D_	NA_x000D_	NA_x000D_	NA_x000D_	NA_x000D_	NA_x000D_	NA_x000D_	NA_x000D_	NA_x000D_
Bacteria	Gamma-Proteobacteria	Pseudomonas sp. CO183	(OCX90650.1)_x000D_ 9.3E-11	(OCX91748.1)_x000D_ 4.7E-17	(OCX91265.1)_x000D_ 1E-63	NA_x000D_	NA_x000D_	NA_x000D_	NA_x000D_	NA_x000D_	(OCX92233.1)_x000D_ 1.3E-50	NA_x000D_	NA_x000D_	NA_x000D_	NA_x000D_	NA_x000D_	NA_x000D_	NA_x000D_	NA_x000D_	NA_x000D_	NA_x000D_	NA_x000D_	NA_x000D_
Bacteria	Cyanobacteria	Leptolyngbya ohadii	NA_x000D_	(WP_088891355.1)_x000D_ 3E-15	WP_088890393.1_x000D_ 2E-17	NA_x000D_	NA_x000D_	(WP_179228693.1)_x000D_ 1.1E-50	NA_x000D_	NA_x000D_	(WP_088893833.1)_x000D_ 1E-22	NA_x000D_	NA_x000D_	NA_x000D_	NA_x000D_	NA_x000D_	NA_x000D_	NA_x000D_	(WP_088892195.1)_x000D_ 5E-22	(WP_088891523.1)_x000D_ 1E-72	NA_x000D_	WP_088894351.1_x000D_ 8E-128	(WP_088892815.1)_x000D_ 5.7E-133
Bacteria	Cyanobacteria	Synechococcus bigranulatus	NA_x000D_	(WP_244349138.1)_x000D_ 6E-08	WP_244348357.1_x000D_ 2E-20	NA_x000D_	NA_x000D_	NA_x000D_	NA_x000D_	NA_x000D_	(WP_244349323.1)_x000D_ 5E-25	NA_x000D_	NA_x000D_	NA_x000D_	NA_x000D_	NA_x000D_	NA_x000D_	NA_x000D_	(WP_244349398.1)_x000D_ 3E-26	(WP_244349219.1)_x000D_ 4E-67	NA_x000D_	WP_244352593.1_x000D_ 1E-126	(WP_244350845.1)_x000D_ 3E-21
Bacteria	Cyanobacteria	Microcystis wesenbergii TW10	NA_x000D_	(REJ53143.1)_x000D_ 3.4E-141	(REJ53140.1)_x000D_ 6.4E-78	NA_x000D_	NA_x000D_	NA_x000D_	NA_x000D_	NA_x000D_	(REJ54507.1)_x000D_ 4.1E-98	NA_x000D_	NA_x000D_	NA_x000D_	NA_x000D_	NA_x000D_	NA_x000D_	NA_x000D_	NA_x000D_	(REJ55170.1)_x000D_ 1.5E-147	NA_x000D_	REJ51255.1_x000D_ 0	(REJ50734.1)_x000D_ 9.4E-133
Bacteria	Cyanobacteria	Nostoc punctiforme PCC 73102	NA_x000D_	(ACC80658.1)_x000D_ 5.8E-09	(ACC82148.1)_x000D_ 8.6E-135	NA_x000D_	NA_x000D_	NA_x000D_	NA_x000D_	NA_x000D_	(ACC82148.1)_x000D_ 1.8E-92	NA_x000D_	NA_x000D_	NA_x000D_	NA_x000D_	NA_x000D_	NA_x000D_	NA_x000D_	(ACC78845.1)_x000D_ 6.8E-24	(ACC82212.1)_x000D_ 3.4E-148	NA_x000D_	NA_x000D_	NA_x000D_
Bacteria	Cyanobacteria	Dulcicalothrix desertica	NA_x000D_	(WP_127079487.1)_x000D_ 6.7E-124	(WP_127080107.1)_x000D_ 4.7E-85	NA_x000D_	NA_x000D_	(WP_127081359.1)_x000D_ 1.4E-30	NA_x000D_	NA_x000D_	(WP_127080600.1)_x000D_ 2E-156	NA_x000D_	NA_x000D_	NA_x000D_	NA_x000D_	NA_x000D_	NA_x000D_	NA_x000D_	(WP_127080838.1)_x000D_ 6.7E-24	(WP_127078041.1)_x000D_ 1.7E-148	NA_x000D_	WP_127081944.1_x000D_ 0	NA_x000D_
Bacteria	Chlamydiae	Chlamydiae bacterium	NA_x000D_	(NGX42373.1)_x000D_ 5E-13	MBM3207884.1_x000D_ 6E-14	NA_x000D_	NA_x000D_	NA_x000D_	NA_x000D_	NA_x000D_	(MBI1883523.1)_x000D_ 2E-16	NA_x000D_	NA_x000D_	NA_x000D_	NA_x000D_	(NGX57141.1)_x000D_ 5E-29	NA_x000D_	NA_x000D_	(MBI1883056.1)_x000D_ 7E-23	(MBI1884380.1)_x000D_ 1E-73	NA_x000D_	NGX38188.1_x000D_ 4E-115	(NGX39960.1)_x000D_ 1E-118
Bacteria	Chlamydiae	Simkania negevensis	NA_x000D_	NA_x000D_	MBI3211073.1_x000D_ 6E-12	NA_x000D_	NA_x000D_	NA_x000D_	NA_x000D_	NA_x000D_	(MBN4067403.1)_x000D_ 3E-15	NA_x000D_	NA_x000D_	NA_x000D_	NA_x000D_	(WP_041418893.1)_x000D_ 4E-09	NA_x000D_	NA_x000D_	(MBN4067468.1)_x000D_ 3E-20	(WP_013942542.1)_x000D_ 5E-63	NA_x000D_	WP_013943754.1_x000D_ 1.4E-274	(MBN4066548.1)_x000D_ 8E-112
Bacteria	Chlamydiae	Chlamydia abortus	NA_x000D_	NA_x000D_	SHE13258.1_x000D_ 2E-18	NA_x000D_	NA_x000D_	NA_x000D_	NA_x000D_	NA_x000D_	(SHE13508.1)_x000D_ 9E-19	NA_x000D_	NA_x000D_	NA_x000D_	NA_x000D_	(WP_139414377.1)_x000D_ 1.3E-115	NA_x000D_	NA_x000D_	(SHE14286.1)_x000D_ 4E-18	(SHE13157.1)_x000D_ 2E-69	NA_x000D_	WP_149305240.1_x000D_ 1E-115	(SGA31721.1)_x000D_ 4.2E-153
Bacteria	Chlamydiae	Chlamydia pneumoniae B21	NA_x000D_	NA_x000D_	(ETR80299.1)_x000D_ 1.1E-102	NA_x000D_	NA_x000D_	NA_x000D_	NA_x000D_	NA_x000D_	(ETR79902.1)_x000D_ 1E-15	NA_x000D_	NA_x000D_	NA_x000D_	NA_x000D_	NA_x000D_	NA_x000D_	NA_x000D_	NA_x000D_	NA_x000D_	NA_x000D_	ETR80156.1_x000D_ 2.3E-190	NA_x000D_
Bacteria	Chlamydiae	Parachlamydia acanthamoebae	NA_x000D_	NA_x000D_	WP_237753919.1_x000D_ 1E-11	NA_x000D_	NA_x000D_	NA_x000D_	NA_x000D_	NA_x000D_	(WP_013924524.1)_x000D_ 1E-14	NA_x000D_	NA_x000D_	NA_x000D_	NA_x000D_	(WP_006339826.1)_x000D_ 8E-106	NA_x000D_	NA_x000D_	(WP_006340388.1)_x000D_ 2.2E-30	(KIA76747.1)_x000D_ 2E-66	NA_x000D_	KIA77882.1_x000D_ 1.1E-281	(KIA78462.1)_x000D_ 7E-112
Fungi	Fungi	Apophysomyces sp. BC1034	(KAG0190820.1)_x000D_ 3.3E-58	(KAG0185193.1)_x000D_ 4E-10	KAG0187110.1_x000D_ 8E-25	(KAG0185328.1)_x000D_ 2.2E-36	NA_x000D_	(KAG0188482.1)_x000D_ 9E-14	(KAG0188152.1)_x000D_ 5.1E-50	NA_x000D_	(KAG0187304.1)_x000D_ 4E-18	NA_x000D_	NA_x000D_	NA_x000D_	NA_x000D_	NA_x000D_	(KAG0192912.1)_x000D_ 2E-87	(KAG0194593.1)_x000D_ 3.4E-54	(KAG0193163.1)_x000D_ 5E-24	(KAG0188043.1)_x000D_ 2E-105	NA_x000D_	KAG0192012.1_x000D_ 7E-85	(KAG0190642.1)_x000D_ 2E-95
Fungi	Fungi	Ogataea polymorpha	(KAG7887831.1)_x000D_ 4E-62	(KAG7925628.1)_x000D_ 5.4E-75	(KAG7925651.1)_x000D_ 2.3E-290	(XP_018209671.1)_x000D_ 5.8E-33	NA_x000D_	(KAG7890376.1)_x000D_ 4.5E-229	(KAG7878939.1)_x000D_ 4.7E-68	NA_x000D_	(KAG7876980.1)_x000D_ 3.2E-183	NA_x000D_	NA_x000D_	NA_x000D_	NA_x000D_	NA_x000D_	(XP_018212666.1)_x000D_ 4E-101	(KAG7908024.1)_x000D_ 6.6E-73	(KAG7879035.1)_x000D_ 4.9E-24	(KAG7927298.1)_x000D_ 1.2E-192	NA_x000D_	KAG7900680.1_x000D_ 3.7E-107	NA_x000D_
Fungi	Fungi	Batrachochytrium salamandrivorans	(KAH6571421.1)_x000D_ 6.7E-65	(KAH6576428.1)_x000D_ 1E-73	KAH6595666.1_x000D_ 3E-31	(KAH9259148.1)_x000D_ 4E-33	NA_x000D_	(OON07534.1)_x000D_ 3E-37	(KAH6568658.1)_x000D_ 2.4E-67	NA_x000D_	(KAH9271546.1)_x000D_ 1E-16	NA_x000D_	(KAH9257042.1)_x000D_ 5.2E-19	NA_x000D_	NA_x000D_	NA_x000D_	(KAH9257054.1)_x000D_ 4E-10	(KAH6577472.1)_x000D_ 4E-15	(KAH9261426.1)_x000D_ 1E-14	(KAH6595638.1)_x000D_ 2E-109	NA_x000D_	KAH9256098.1_x000D_ 2E-16	NA_x000D_
Fungi	Fungi	Fusarium gaditjirri	(KAF4946075.1)_x000D_ 2.2E-77	(KAF4946075.1)_x000D_ 6.3E-89	(KAF4949567.1)_x000D_ 6E-298	(KAF4960202.1)_x000D_ 4.2E-63	NA_x000D_	(KAF4959400.1)_x000D_ 3.8E-239	(KAF4944230.1)_x000D_ 1.9E-80	(KAF4944230.1)_x000D_ 5.1E-78	(KAF4945473.1)_x000D_ 1.8E-190	NA_x000D_	NA_x000D_	NA_x000D_	NA_x000D_	(KAF4952690.1)_x000D_ 3.5E-291	(KAF4956751.1)_x000D_ 4E-125	(KAF4952856.1)_x000D_ 1.5E-107	(KAF4948952.1)_x000D_ 8.1E-29	(KAF4954784.1)_x000D_ 6.2E-208	NA_x000D_	KAF4954571.1_x000D_ 6.5E-128	NA_x000D_
Fungi	Fungi	Saccharomyces cerevisiae YJM1208	(AJS41681.1)_x000D_ 6.3E-28	(AJS41681.1)_x000D_ 5.7E-50	AJU85211.1_x000D_ 2E-24	(AJR95605.1)_x000D_ 3.7E-18	NA_x000D_	(AJP97511.1)_x000D_ 3E-36	NA_x000D_	NA_x000D_	(AJU44046.1)_x000D_ 3E-16	NA_x000D_	NA_x000D_	NA_x000D_	NA_x000D_	NA_x000D_	(AJU44065.1)_x000D_ 2E-73	NA_x000D_	(AJS41707.1)_x000D_ 7E-10	(AJT90258.1)_x000D_ 9E-101	NA_x000D_	AJT16309.1_x000D_ 9E-16	NA_x000D_
Metazoa	Metazoa	Danio rerio	(NP_956704.1)_x000D_ 3.4E-91	(Q503M4.1)_x000D_ 6.4E-106	XP_021323605.1_x000D_ 2E-32	NA_x000D_	XP_017214024.2_x000D_ 3.5E-136	(XP_005159272.1)_x000D_ 3E-45	NA_x000D_	(NP_001002559.1)_x000D_ 5.8E-106	(XP_017206710.1)_x000D_ 2E-13	NA_x000D_	(XP_005172521.1)_x000D_ 2E-20	NA_x000D_	NA_x000D_	(NP_001314797.1)_x000D_ 5E-46	(AAH67565.1)_x000D_ 6E-85	(NP_998239.1)_x000D_ 3E-27	(NP_001003418.1)_x000D_ 7E-13	(NP_001103871.1)_x000D_ 5E-102	NA_x000D_	XP_005159564.1_x000D_ 8.9E-100	NA_x000D_
Metazoa	Metazoa	Diploscapter pachys	PAV82957.1_x000D_ 3E-12	(PAV87531.1)_x000D_ 6E-24	PAV91759.1_x000D_ 7E-29	NA_x000D_	PAV73408.1_x000D_ 4.1E-117	(PAV64318.1)_x000D_ 3E-47	NA_x000D_	(PAV59342.1)_x000D_ 3E-92	(PAV67989.1)_x000D_ 4E-13	NA_x000D_	PAV83843.1_x000D_ 7E-11	NA_x000D_	NA_x000D_	(PAV87395.1)_x000D_ 9E-47	(PAV77714.1)_x000D_ 4E-83	(PAV59436.1)_x000D_ 1E-22	(PAV66379.1)_x000D_ 1E-12	(PAV76809.1)_x000D_ 3E-92	NA_x000D_	PAV84356.1_x000D_ 1E-18	NA_x000D_
Metazoa	Metazoa	Haliotis rufescens	XP_046342150.1_x000D_ 5E-27	(XP_048246831.1)_x000D_ 3E-58	XP_048239437.1_x000D_ 1E-29	NA_x000D_	XP_048256927.1_x000D_ 4.6E-123	(XP_048250112.1)_x000D_ 5E-49	NA_x000D_	(XP_046352265.2)_x000D_ 8.5E-84	(XP_046362059.1)_x000D_ 1E-14	NA_x000D_	(XP_048239980.1)_x000D_ 6.9E-81	NA_x000D_	NA_x000D_	(XP_046356114.1)_x000D_ 1E-47	(XP_046339856.1)_x000D_ 2E-84	(XP_046326127.1)_x000D_ 2.1E-100	(XP_046369935.2)_x000D_ 9E-10	(XP_046329763.2)_x000D_ 5E-100	NA_x000D_	XP_046351886.1_x000D_ 9.9E-94	NA_x000D_
Metazoa	Metazoa	Homo sapiens	(NP_689740.2)_x000D_ 3E-127	(NP_919274.1)_x000D_ 3E-09	KAI2564793.1_x000D_ 4E-33	NA_x000D_	XP_011521026.1_x000D_ 8.3E-143	(XP_047305154.1)_x000D_ 1E-45	NA_x000D_	(EAX00674.1)_x000D_ 4.7E-103	(BAB14989.1)_x000D_ 1E-12	NA_x000D_	(CAD28502.1)_x000D_ 1.7E-20	NA_x000D_	NA_x000D_	(BAG36188.1)_x000D_ 1E-44	(AAH15379.2)_x000D_ 1E-87	(NP_079157.3)_x000D_ 3E-25	(NP_004994.1)_x000D_ 7E-14	(NP_006850.2)_x000D_ 1E-102	NA_x000D_	BAD92116.1_x000D_ 4.7E-101	NA_x000D_
Metazoa	Metazoa	Dicentrarchus labrax	(CBN81241.1)_x000D_ 1.8E-67	(CBN80757.1)_x000D_ 2.9E-92	(ABF48197.2)_x000D_ 3.2E-196	NA_x000D_	CBN81174.1_x000D_ 2.9E-134	NA_x000D_	NA_x000D_	NA_x000D_	(CBN82106.1)_x000D_ 2.2E-154	NA_x000D_	(CBN81615.1)_x000D_ 1.7E-11	NA_x000D_	NA_x000D_	(CBN80865.1)_x000D_ 1.6E-227	(AXL14383.1)_x000D_ 5.2E-66	(CBN81824.1)_x000D_ 8.8E-16	NA_x000D_	NA_x000D_	NA_x000D_	CBN81261.1_x000D_ 2.3E-83	NA_x000D_
Viridplantae	Chlorophyta	Chlorella vulgaris	NA_x000D_	NA_x000D_	KAI3430754.1_x000D_ 9E-29	(KAI3433329.1)_x000D_ 3E-28	KAI3428547.1_x000D_ 8E-64	(KAI3424084.1)_x000D_ 3E-42	(KAI3437753.1)_x000D_ 1.2E-57	(KAI3437753.1)_x000D_ 1.5E-78	(KAI3428141.1)_x000D_ 7E-18	NA_x000D_	(KAI3434923.1)_x000D_ 4.3E-19	NA_x000D_	NA_x000D_	NA_x000D_	(KAI3430268.1)_x000D_ 2E-101	(KAI3439127.1)_x000D_ 1E-60	(KAI3435524.1)_x000D_ 2E-15	(KAI3426440.1)_x000D_ 1E-97	NA_x000D_	KAI3432568.1_x000D_ 3E-116	(KAI3426415.1)_x000D_ 2E-18
Viridplantae	Chlorophyta	Chlamydomonas schloesseri	NA_x000D_	NA_x000D_	KAG2425890.1_x000D_ 7E-28	(KAG2450731.1)_x000D_ 9E-20	KAG2451636.1_x000D_ 2E-115	(KAG2442242.1)_x000D_ 6E-46	(KAG2447117.1)_x000D_ 5.1E-59	(KAG2447117.1)_x000D_ 2.3E-82	(KAG2431609.1)_x000D_ 9E-18	NA_x000D_	(KAG2425127.1)_x000D_ 2E-08	NA_x000D_	NA_x000D_	NA_x000D_	(KAG2450087.1)_x000D_ 4E-104	(KAG2451660.1)_x000D_ 5E-64	(KAG2433063.1)_x000D_ 1E-16	(KAG2452879.1)_x000D_ 2E-101	NA_x000D_	KAG2452104.1_x000D_ 4E-95	(KAG2431596.1)_x000D_ 5.5E-142
Viridplantae	Chlorophyta	Trebouxia sp. A1-2	NA_x000D_	NA_x000D_	KAA6424037.1_x000D_ 2E-29	(KAA6415264.1)_x000D_ 3E-30	KAA6417024.1_x000D_ 1.3E-46	(KAA6417452.1)_x000D_ 4E-44	(KAA6419265.1)_x000D_ 2E-58	(KAA6419265.1)_x000D_ 1.6E-73	(KAA6428139.1)_x000D_ 4E-17	NA_x000D_	(KAA6426504.1)_x000D_ 3.9E-17	NA_x000D_	NA_x000D_	NA_x000D_	(KAA6418529.1)_x000D_ 1E-97	(KAA6419758.1)_x000D_ 9E-55	(KAA6419667.1)_x000D_ 6E-15	(KAA6429280.1)_x000D_ 3E-100	NA_x000D_	KAA6418848.1_x000D_ 1.4E-101	(KAA6423497.1)_x000D_ 2.5E-135
Viridplantae	Chlorophyta	Monoraphidium neglectum	NA_x000D_	NA_x000D_	XP_013900679.1_x000D_ 7E-26	(XP_013902065.1)_x000D_ 3.5E-75	XP_013905746.1_x000D_ 1.5E-106	(XP_013904519.1)_x000D_ 4.1E-20	(XP_013906567.1)_x000D_ 4.9E-50	(XP_013906567.1)_x000D_ 7.5E-64	(XP_013890560.1)_x000D_ 1E-17	NA_x000D_	(XP_013898738.1)_x000D_ 8E-18	NA_x000D_	NA_x000D_	NA_x000D_	(XP_013906220.1)_x000D_ 3E-102	(XP_013905042.1)_x000D_ 2E-41	(XP_013905057.1)_x000D_ 4E-14	(XP_013898351.1)_x000D_ 4E-38	NA_x000D_	XP_013890817.1_x000D_ 2E-14	(XP_013896679.1)_x000D_ 2.5E-83
Viridplantae	Chlorophyta	Chlorella variabilis	NA_x000D_	NA_x000D_	XP_005844664.1_x000D_ 8E-26	(XP_005851628.1)_x000D_ 2E-26	XP_005847467.1_x000D_ 1.4E-65	(XP_005845578.1)_x000D_ 5E-38	(XP_005848113.1)_x000D_ 3.6E-63	(XP_005848113.1)_x000D_ 7.9E-83	(XP_005843266.1)_x000D_ 2E-15	NA_x000D_	(XP_005849270.1)_x000D_ 4.8E-19	NA_x000D_	NA_x000D_	NA_x000D_	(XP_005844628.1)_x000D_ 9E-92	(XP_005843473.1)_x000D_ 8E-56	(XP_005850509.1)_x000D_ 6E-15	(XP_005847137.1)_x000D_ 2E-94	NA_x000D_	XP_005843581.1_x000D_ 9E-118	(XP_005848540.1)_x000D_ 2E-20
Viridplantae	Chlorophyta	Edaphochlamys debaryana	NA_x000D_	NA_x000D_	KAG2493419.1_x000D_ 9E-28	(KAG2491516.1)_x000D_ 2E-24	KAG2489238.1_x000D_ 1.1E-112	(KAG2491940.1)_x000D_ 1E-41	(KAG2490305.1)_x000D_ 1.7E-46	(KAG2490305.1)_x000D_ 1.3E-64	(KAG2485398.1)_x000D_ 3E-21	NA_x000D_	(KAG2486354.1)_x000D_ 4.2E-23	NA_x000D_	NA_x000D_	NA_x000D_	(KAG2495739.1)_x000D_ 1E-94	(KAG2489028.1)_x000D_ 5E-60	(KAG2485015.1)_x000D_ 2E-14	(KAG2489706.1)_x000D_ 8E-100	NA_x000D_	KAG2483101.1_x000D_ 8E-84	(KAG2485361.1)_x000D_ 7.1E-141
Viridplantae	Chlorophyta	Micromonas commoda	NA_x000D_	NA_x000D_	(XP_002508219.1)_x000D_ 4.2E-249	(XP_002500819.1)_x000D_ 8.4E-59	XP_002507789.1_x000D_ 1.8E-112	(XP_002507334.1)_x000D_ 2E-35	(XP_002502883.1)_x000D_ 1.4E-40	(XP_002502883.1)_x000D_ 7.2E-63	(XP_002499746.1)_x000D_ 3E-16	NA_x000D_	(XP_002502838.1)_x000D_ 1.5E-15	NA_x000D_	NA_x000D_	(XP_002507431.1)_x000D_ 5.5E-164	(XP_002501167.1)_x000D_ 2E-62	(XP_002506268.1)_x000D_ 2E-46	(XP_002503128.1)_x000D_ 6E-14	(XP_002504861.1)_x000D_ 1E-104	NA_x000D_	XP_002505901.1_x000D_ 1E-103	(XP_002502974.1)_x000D_ 5E-135
Viridplantae	Chlorophyta	Gonium pectorale	NA_x000D_	NA_x000D_	KXZ43142.1_x000D_ 7E-29	(KXZ45371.1)_x000D_ 5E-22	KXZ52368.1_x000D_ 8.2E-108	(KXZ54733.1)_x000D_ 6E-42	(KXZ48122.1)_x000D_ 2.3E-27	(KXZ44196.1)_x000D_ 8E-52	(KXZ43852.1)_x000D_ 5E-17	NA_x000D_	(KXZ56576.1)_x000D_ 1.6E-17	NA_x000D_	NA_x000D_	NA_x000D_	(KXZ56593.1)_x000D_ 4E-104	(KXZ52402.1)_x000D_ 7E-63	(KXZ46878.1)_x000D_ 2E-16	(KXZ54401.1)_x000D_ 5E-100	NA_x000D_	KXZ50501.1_x000D_ 6E-91	(KXZ43848.1)_x000D_ 5.2E-142
Viridplantae	Chlorophyta	Ostreococcus tauri	NA_x000D_	NA_x000D_	(XP_022839396.1)_x000D_ 4.1E-245	(OUS48658.1)_x000D_ 7E-49	OUS48482.1_x000D_ 1.6E-100	(XP_022838175.1)_x000D_ 5E-41	(XP_003082688.1)_x000D_ 2E-10	(XP_003082688.1)_x000D_ 1.8E-78	(XP_022841204.1)_x000D_ 3E-17	NA_x000D_	(OUS45328.1)_x000D_ 6.4E-14	NA_x000D_	NA_x000D_	NA_x000D_	(XP_003084181.1)_x000D_ 1E-64	(XP_003078079.1)_x000D_ 3E-54	(OUS43058.1)_x000D_ 4E-13	(XP_022838789.1)_x000D_ 9E-100	NA_x000D_	XP_022840470.1_x000D_ 5E-107	(XP_003080685.1)_x000D_ 2.6E-136
Viridplantae	Chlorophyta	Volvox reticuliferus	NA_x000D_	NA_x000D_	GIL76009.1_x000D_ 4E-26	(GIL76375.1)_x000D_ 5E-21	GIL88322.1_x000D_ 1.3E-94	(GIL91609.1)_x000D_ 2E-68	(GIM00303.1)_x000D_ 4.3E-62	(GIL73665.1)_x000D_ 2.1E-89	(GIL71054.1)_x000D_ 1E-21	NA_x000D_	(GIL77507.1)_x000D_ 5E-95	NA_x000D_	NA_x000D_	NA_x000D_	(GIL72776.1)_x000D_ 2E-105	(GIL88381.1)_x000D_ 2E-56	(GIL77987.1)_x000D_ 1E-15	(GIL69640.1)_x000D_ 2E-100	NA_x000D_	GIL85974.1_x000D_ 4E-102	(GIL71042.1)_x000D_ 4.3E-141
Viridplantae	Chlorophyta	Chlamydomonas eustigma	NA_x000D_	NA_x000D_	GAX80189.1_x000D_ 5E-25	(GAX74844.1)_x000D_ 6E-18	GAX83898.1_x000D_ 4.5E-94	(GAX76176.1)_x000D_ 3E-73	(GAX79156.1)_x000D_ 1.2E-49	(GAX79156.1)_x000D_ 3.1E-67	(GAX72848.1)_x000D_ 1E-16	NA_x000D_	(GAX80861.1)_x000D_ 6E-09	NA_x000D_	NA_x000D_	NA_x000D_	(GAX75369.1)_x000D_ 4E-97	(GAX82853.1)_x000D_ 3E-47	(GAX81054.1)_x000D_ 3E-17	(GAX76656.1)_x000D_ 2E-102	NA_x000D_	GAX81829.1_x000D_ 2E-114	(GAX74007.1)_x000D_ 5.7E-141
Viridplantae	Chlorophyta	Volvox africanus	NA_x000D_	NA_x000D_	GIL62841.1_x000D_ 6E-24	(GIL45085.1)_x000D_ 1E-22	GIL50399.1_x000D_ 1.3E-100	(GIL53462.1)_x000D_ 1E-71	(GIL49432.1)_x000D_ 2.6E-61	(GIL49432.1)_x000D_ 5E-85	(GIL42316.1)_x000D_ 1E-17	NA_x000D_	(GIL64804.1)_x000D_ 3E-08	NA_x000D_	NA_x000D_	NA_x000D_	(GIL43203.1)_x000D_ 1E-104	(GIL55355.1)_x000D_ 7E-57	(GIL57360.1)_x000D_ 7E-19	(GIL54648.1)_x000D_ 5E-101	NA_x000D_	GIL61768.1_x000D_ 2E-103	(GIL52018.1)_x000D_ 2.2E-140
Viridplantae	Chlorophyta	Micractinium conductrix	NA_x000D_	NA_x000D_	PSC71782.1_x000D_ 4E-26	(PSC76787.1)_x000D_ 3E-20	PSC71712.1_x000D_ 3.9E-79	(PSC74068.1)_x000D_ 5E-42	(PSC69568.1)_x000D_ 7E-63	(PSC69568.1)_x000D_ 2E-79	(PSC72484.1)_x000D_ 5E-17	NA_x000D_	(PSC77070.1)_x000D_ 2.3E-17	NA_x000D_	NA_x000D_	NA_x000D_	(PSC69989.1)_x000D_ 3E-99	(PSC67934.1)_x000D_ 4E-53	(PSC72674.1)_x000D_ 3E-14	(PSC72214.1)_x000D_ 1E-97	NA_x000D_	PSC74003.1_x000D_ 5E-110	(PSC68040.1)_x000D_ 4E-18
Viridplantae	Chlorophyta	Scenedesmus sp. PABB004	NA_x000D_	NA_x000D_	KAF8071336.1_x000D_ 1E-24	(KAF8061896.1)_x000D_ 3.5E-29	KAF8072369.1_x000D_ 6E-84	(KAF8059178.1)_x000D_ 3E-31	(KAF8068324.1)_x000D_ 7.5E-47	(KAF8068324.1)_x000D_ 2.2E-61	(KAF8054979.1)_x000D_ 6E-15	NA_x000D_	(KAF8061995.1)_x000D_ 1.4E-51	NA_x000D_	NA_x000D_	NA_x000D_	(KAF8067138.1)_x000D_ 5E-96	(KAF8058460.1)_x000D_ 2E-49	(KAF8058096.1)_x000D_ 6E-14	(KAF8065909.1)_x000D_ 3E-87	NA_x000D_	KAF8061304.1_x000D_ 7E-94	(KAF8073080.1)_x000D_ 7.6E-144
Viridplantae	Chlorophyta	Ostreococcus lucimarinus CCE9901	NA_x000D_	NA_x000D_	(XP_001418885.1)_x000D_ 1.3E-244	(XP_001418353.1)_x000D_ 8.4E-60	XP_001418450.1_x000D_ 5.3E-100	(XP_001415443.1)_x000D_ 2E-32	(XP_001420975.1)_x000D_ 2.7E-54	(XP_001420975.1)_x000D_ 4.3E-90	(XP_001421341.1)_x000D_ 3E-19	NA_x000D_	(XP_001421974.1)_x000D_ 3E-13	NA_x000D_	NA_x000D_	NA_x000D_	(XP_001422245.1)_x000D_ 7E-64	(XP_001416614.1)_x000D_ 8E-55	(XP_001420610.1)_x000D_ 4E-13	(XP_001417274.1)_x000D_ 1E-97	NA_x000D_	XP_001422022.1_x000D_ 7E-104	(XP_001419302.1)_x000D_ 1.3E-131
Viridplantae	Chlorophyta	Scenedesmus sp. NREL 46B-D3	NA_x000D_	NA_x000D_	KAF6256103.1_x000D_ 5E-27	(KAF6262899.1)_x000D_ 2.6E-29	KAF6257951.1_x000D_ 6.5E-75	(KAF6257013.1)_x000D_ 2E-37	(KAF6254796.1)_x000D_ 2.6E-50	(KAF6254796.1)_x000D_ 7.7E-66	(KAF6252209.1)_x000D_ 5E-16	NA_x000D_	(KAF6260055.1)_x000D_ 1E-08	NA_x000D_	NA_x000D_	NA_x000D_	(KAF6253476.1)_x000D_ 2E-103	(KAF6262719.1)_x000D_ 2E-54	(KAF6261076.1)_x000D_ 3E-17	(KAF6259337.1)_x000D_ 4E-98	NA_x000D_	KAF6254075.1_x000D_ 2E-107	(KAF6253015.1)_x000D_ 7.8E-145
Viridplantae	Chlorophyta	Volvox carteri f. nagariensis	NA_x000D_	NA_x000D_	XP_002946948.1_x000D_ 3E-23	(XP_002951355.1)_x000D_ 9E-08	XP_002959193.1_x000D_ 7.7E-104	(XP_002951813.1)_x000D_ 2E-46	(XP_002956368.1)_x000D_ 6.6E-39	(XP_002956368.1)_x000D_ 1.1E-55	(XP_002953231.1)_x000D_ 8E-16	NA_x000D_	(XP_002955268.1)_x000D_ 2.4E-16	NA_x000D_	NA_x000D_	NA_x000D_	(XP_002946967.1)_x000D_ 3E-105	(XP_002959029.1)_x000D_ 8E-49	(XP_002952514.1)_x000D_ 6E-15	(XP_002956597.1)_x000D_ 3E-102	NA_x000D_	XP_002951147.1_x000D_ 9E-70	(XP_002947297.1)_x000D_ 1.9E-142
Viridplantae	Chlorophyta	Pycnococcus provasolii	NA_x000D_	NA_x000D_	(GHP04021.1)_x000D_ 1.2E-251	(GHP11174.1)_x000D_ 5E-36	GHP08650.1_x000D_ 3.6E-54	(GHP06320.1)_x000D_ 2E-29	(GHP05060.1)_x000D_ 9.3E-35	(GHP05060.1)_x000D_ 3.4E-56	(GHP02482.1)_x000D_ 2E-17	NA_x000D_	(GHP01312.1)_x000D_ 2.4E-15	NA_x000D_	NA_x000D_	(GHP02114.1)_x000D_ 1.5E-211	(GHP01447.1)_x000D_ 3E-59	(GHP03974.1)_x000D_ 1E-48	(GHP11549.1)_x000D_ 6E-15	(GHP04324.1)_x000D_ 8E-97	NA_x000D_	GHP11191.1_x000D_ 3E-82	(GHP02502.1)_x000D_ 5.9E-132
Viridplantae	Chlorophyta	Chlamydomonas reinhardtii	NA_x000D_	NA_x000D_	XP_042922005.1_x000D_ 2E-29	(XP_042914479.1)_x000D_ 8E-20	XP_042915693.1_x000D_ 4.5E-113	(XP_001692387.2)_x000D_ 6E-46	(XP_042928283.1)_x000D_ 1.1E-58	(XP_042928283.1)_x000D_ 3.8E-80	(XP_042922056.1)_x000D_ 5E-22	NA_x000D_	(XP_042927995.1)_x000D_ 5.5E-21	NA_x000D_	NA_x000D_	NA_x000D_	(XP_001703471.1)_x000D_ 6E-105	(XP_001701487.1)_x000D_ 3E-63	(XP_001693782.1)_x000D_ 2E-16	(XP_001699662.1)_x000D_ 4E-101	NA_x000D_	XP_042925262.1_x000D_ 1E-81	(XP_001701302.1)_x000D_ 1.3E-140
Viridplantae	Chlorophyta	Micromonas pusilla CCMP1545	NA_x000D_	NA_x000D_	(XP_003058212.1)_x000D_ 3.3E-241	(XP_003059404.1)_x000D_ 5.1E-35	XP_003056815.1_x000D_ 1.1E-118	(XP_003061009.1)_x000D_ 5E-39	(XP_003057566.1)_x000D_ 2.3E-37	(XP_003057322.1)_x000D_ 2.9E-29	(XP_003058084.1)_x000D_ 1E-16	NA_x000D_	(XP_003063967.1)_x000D_ 2.9E-16	NA_x000D_	NA_x000D_	(XP_003055334.1)_x000D_ 3.1E-155	(XP_003064596.1)_x000D_ 4E-65	(XP_003060554.1)_x000D_ 7E-45	(XP_003064585.1)_x000D_ 1E-15	(XP_003060743.1)_x000D_ 5E-100	NA_x000D_	XP_003062700.1_x000D_ 1E-100	(XP_003058771.1)_x000D_ 7E-143
Viridplantae	Chlorophyta	Chlamydomonas incerta	NA_x000D_	NA_x000D_	KAG2440863.1_x000D_ 5E-29	(KAG2438116.1)_x000D_ 4E-19	KAG2441916.1_x000D_ 1.2E-108	(KAG2434742.1)_x000D_ 1E-68	(KAG2444385.1)_x000D_ 5E-55	(KAG2444385.1)_x000D_ 7.5E-78	(KAG2445399.1)_x000D_ 1E-21	NA_x000D_	(KAG2422468.1)_x000D_ 8E-08	NA_x000D_	NA_x000D_	NA_x000D_	(ABA01115.1)_x000D_ 8E-104	(KAG2441890.1)_x000D_ 3E-64	(KAG2443679.1)_x000D_ 8E-17	(KAG2422863.1)_x000D_ 1E-101	NA_x000D_	KAG2423189.1_x000D_ 4E-79	(KAG2445385.1)_x000D_ 2.2E-140
Viridplantae	Chlorophyta	Dunaliella salina	NA_x000D_	NA_x000D_	(KAF5827324.1)_x000D_ 1.3E-160	(KAF5838044.1)_x000D_ 3E-21	KAF5841709.1_x000D_ 1E-52	(KAF5842731.1)_x000D_ 9E-42	(KAF5840468.1)_x000D_ 5.5E-55	(KAF5840468.1)_x000D_ 8.9E-75	(KAF5834204.1)_x000D_ 7E-18	NA_x000D_	(KAF5838659.1)_x000D_ 5.6E-16	NA_x000D_	NA_x000D_	(KAF5830089.1)_x000D_ 7.2E-186	(KAF5842814.1)_x000D_ 3E-105	(KAF5840710.1)_x000D_ 5E-52	(KAF5839681.1)_x000D_ 1E-14	(KAF5827959.1)_x000D_ 3E-106	NA_x000D_	KAF5833450.1_x000D_ 2E-99	(AFK94154.1)_x000D_ 1.8E-135
Viridplantae	Chlorophyta	Bathycoccus prasinos	NA_x000D_	NA_x000D_	(XP_007509027.1)_x000D_ 2.9E-249	(XP_007513193.1)_x000D_ 1.5E-22	XP_007508934.1_x000D_ 7.3E-76	(XP_007515364.1)_x000D_ 3E-35	(XP_007508473.1)_x000D_ 3.4E-56	(XP_007508473.1)_x000D_ 1.2E-73	(XP_007509095.1)_x000D_ 9E-18	NA_x000D_	(XP_007512760.1)_x000D_ 3E-17	NA_x000D_	NA_x000D_	NA_x000D_	(XP_007511289.1)_x000D_ 1E-63	(XP_007509749.1)_x000D_ 1E-53	(XP_007510991.1)_x000D_ 3E-12	(XP_007512419.1)_x000D_ 6E-96	NA_x000D_	XP_007509930.1_x000D_ 3E-107	(XP_007513878.1)_x000D_ 5.9E-133
Viridplantae	Streptophyta	Arabidopsis thaliana	NA_x000D_	NA_x000D_	OAP14745.1_x000D_ 3E-26	NA_x000D_	5TUA_A_x000D_ 2E-12	NA_x000D_	(AAT70424.1)_x000D_ 1.3E-80	NA_x000D_	(CAD5335857.1)_x000D_ 3E-19	NA_x000D_	(NP_566356.1)_x000D_ 1.2E-20	NA_x000D_	NA_x000D_	NA_x000D_	(NP_196908.1)_x000D_ 3E-95	(AAM63660.1)_x000D_ 1E-50	(NP_176708.1)_x000D_ 7E-14	(NP_568196.1)_x000D_ 3E-105	NA_x000D_	NP_187680.2_x000D_ 1E-107	(BAH20366.1)_x000D_ 4E-16
Viridplantae	Streptophyta	Apostasia shenzhenica	NA_x000D_	NA_x000D_	(PKA58758.1)_x000D_ 2.2E-294	NA_x000D_	PKA53331.1_x000D_ 1.4E-119	NA_x000D_	(PKA55802.1)_x000D_ 8.5E-73	NA_x000D_	(PKA49098.1)_x000D_ 7E-17	NA_x000D_	(PKA59093.1)_x000D_ 2.5E-19	NA_x000D_	NA_x000D_	NA_x000D_	(PKA60252.1)_x000D_ 6.9E-145	(PKA63713.1)_x000D_ 1E-132	(PKA62268.1)_x000D_ 3.2E-45	(PKA66005.1)_x000D_ 5.2E-197	NA_x000D_	PKA51188.1_x000D_ 2E-111	(PKA49618.1)_x000D_ 1.1E-178
Viridplantae	Streptophyta	Dioscorea alata	NA_x000D_	NA_x000D_	(KAH7657176.1)_x000D_ 2.3E-298	NA_x000D_	KAH7651704.1_x000D_ 2.1E-73	NA_x000D_	(KAH7679516.1)_x000D_ 4.6E-86	NA_x000D_	(KAH7652608.1)_x000D_ 4.5E-170	NA_x000D_	(KAH7677021.1)_x000D_ 7.4E-18	NA_x000D_	NA_x000D_	NA_x000D_	(KAH7679453.1)_x000D_ 2.9E-148	(KAH7658553.1)_x000D_ 3.5E-116	(KAH7654224.1)_x000D_ 2E-48	(KAH7673720.1)_x000D_ 3.1E-196	NA_x000D_	KAH7667363.1_x000D_ 1.4E-283	(KAH7664988.1)_x000D_ 2.6E-188
Viridplantae	Streptophyta	Chara braunii	NA_x000D_	NA_x000D_	(GBG71636.1)_x000D_ 8.1E-236	NA_x000D_	GBG92126.1_x000D_ 3.9E-34	NA_x000D_	(GBG84185.1)_x000D_ 2.7E-65	NA_x000D_	(GBG75636.1)_x000D_ 7E-19	NA_x000D_	(GBG71540.1)_x000D_ 5.7E-21	NA_x000D_	NA_x000D_	NA_x000D_	(GBG79838.1)_x000D_ 1.7E-86	(GBG72173.1)_x000D_ 7E-53	(GBG63686.1)_x000D_ 8.4E-27	(GBG72026.1)_x000D_ 1.6E-174	NA_x000D_	GBG92399.1_x000D_ 2.1E-64	(GBG79851.1)_x000D_ 1.6E-142
Viridplantae	Streptophyta	Selaginella moellendorffii	NA_x000D_	NA_x000D_	(EFJ28004.1)_x000D_ 2.6E-292	NA_x000D_	XP_024517812.1_x000D_ 8.2E-56	NA_x000D_	(XP_002968642.1)_x000D_ 5.4E-71	NA_x000D_	(XP_002992162.2)_x000D_ 1.6E-193	NA_x000D_	(XP_002982812.2)_x000D_ 3.9E-18	NA_x000D_	NA_x000D_	NA_x000D_	(XP_002967659.1)_x000D_ 6.7E-138	(XP_002960055.2)_x000D_ 4.8E-127	(XP_002972811.2)_x000D_ 1.2E-41	(EFJ13029.1)_x000D_ 8E-107	NA_x000D_	XP_024540858.1_x000D_ 2E-118	(XP_002960319.1)_x000D_ 1.9E-171
Viridplantae	Streptophyta	Cuscuta australis	NA_x000D_	NA_x000D_	(RAL47722.1)_x000D_ 2.3E-293	NA_x000D_	RAL38956.1_x000D_ 2.7E-133	NA_x000D_	(RAL38226.1)_x000D_ 3E-84	NA_x000D_	(RAL46213.1)_x000D_ 8.6E-207	NA_x000D_	(RAL53654.1)_x000D_ 5.4E-19	NA_x000D_	NA_x000D_	NA_x000D_	(RAL38185.1)_x000D_ 9.9E-150	(RAL49614.1)_x000D_ 5.2E-131	(RAL38497.1)_x000D_ 1.2E-47	(RAL41792.1)_x000D_ 1.8E-195	NA_x000D_	RAL52404.1_x000D_ 8.1E-203	(RAL38868.1)_x000D_ 2.9E-186
Rhodophyta	Rhodophyta	Chondrus crispus	NA_x000D_	NA_x000D_	XP_005711145.1_x000D_ 2E-23	NA_x000D_	NA_x000D_	(XP_005711885.1)_x000D_ 1E-34	(XP_005714433.1)_x000D_ 3.2E-84	(XP_005714433.1)_x000D_ 3.4E-72	(XP_005713347.1)_x000D_ 4E-26	NA_x000D_	(XP_005713666.1)_x000D_ 6.8E-16	NA_x000D_	NA_x000D_	NA_x000D_	(XP_005714940.1)_x000D_ 3E-160	(XP_005713953.1)_x000D_ 5E-72	(YP_007627399.1)_x000D_ 7.6E-32	(XP_005710221.1)_x000D_ 3E-124	(XP_005715824.1)_x000D_ 4.1E-60	XP_005710881.1_x000D_ 2E-119	(XP_005715383.1)_x000D_ 4E-18
Rhodophyta	Rhodophyta	Cyanidiococcus yangmingshanensis	NA_x000D_	NA_x000D_	KAF6002671.1_x000D_ 7E-22	NA_x000D_	NA_x000D_	(KAF6003039.1)_x000D_ 9E-38	(KAF6003935.1)_x000D_ 3.2E-16	(KAF6003935.1)_x000D_ 5.9E-56	(KAF6002168.1)_x000D_ 3E-27	NA_x000D_	(KAF6001360.1)_x000D_ 2.5E-18	NA_x000D_	NA_x000D_	NA_x000D_	(KAF6005301.1)_x000D_ 3E-70	(KAF6002493.1)_x000D_ 1E-64	(YP_009968250.1)_x000D_ 1.5E-31	(KAF6003525.1)_x000D_ 6E-96	(KAF6004480.1)_x000D_ 2.8E-57	KAF6003215.1_x000D_ 7E-111	(KAF6004439.1)_x000D_ 2E-20
Rhodophyta	Rhodophyta	Cyanidioschyzon merolae strain 10D	NA_x000D_	NA_x000D_	XP_005537371.1_x000D_ 2E-27	NA_x000D_	NA_x000D_	(XP_005537074.1)_x000D_ 2E-37	(XP_005538260.1)_x000D_ 4.1E-18	(XP_005538260.1)_x000D_ 2.6E-58	(XP_005536291.1)_x000D_ 8E-27	NA_x000D_	(XP_005536920.1)_x000D_ 8.4E-18	NA_x000D_	NA_x000D_	NA_x000D_	(XP_005539349.1)_x000D_ 6E-70	(XP_005536532.1)_x000D_ 8E-54	(NP_849041.1)_x000D_ 8E-22	(XP_005538307.1)_x000D_ 4E-117	(XP_005534848.1)_x000D_ 1.7E-54	XP_005538882.1_x000D_ 4E-113	(XP_005534886.1)_x000D_ 1E-20
Rhodophyta	Rhodophyta	Gracilaria domingensis	NA_x000D_	NA_x000D_	KAI0562289.1_x000D_ 7E-21	NA_x000D_	KAI0561323.1_x000D_ 3.1E-144	(KAI0558595.1)_x000D_ 1E-31	(KAI0564410.1)_x000D_ 2.9E-157	(KAI0564410.1)_x000D_ 2.2E-110	(KAI0563600.1)_x000D_ 1E-26	NA_x000D_	(KAI0562498.1)_x000D_ 3.7E-23	NA_x000D_	NA_x000D_	(KAI0562960.1)_x000D_ 5.9E-246	(KAI0559469.1)_x000D_ 8E-150	(KAI0564910.1)_x000D_ 1E-32	(KAI0557287.1)_x000D_ 1.2E-31	(KAI0567167.1)_x000D_ 9E-104	(KAI0559408.1)_x000D_ 8.7E-61	KAI0560085.1_x000D_ 3E-130	(KAI0565591.1)_x000D_ 1E-23
Rhodophyta	Rhodophyta	Galdieria sulphuraria	NA_x000D_	NA_x000D_	XP_005702841.1_x000D_ 2E-27	NA_x000D_	NA_x000D_	(XP_005702951.1)_x000D_ 4E-38	(XP_005703929.1)_x000D_ 2.1E-19	(XP_005703929.1)_x000D_ 5.5E-80	(XP_005707224.1)_x000D_ 2E-25	NA_x000D_	(XP_005707434.1)_x000D_ 1.5E-18	NA_x000D_	NA_x000D_	NA_x000D_	(GJD06965.1)_x000D_ 3E-64	(XP_005707012.1)_x000D_ 3E-77	(XP_005707483.1)_x000D_ 1.5E-31	(XP_005707307.1)_x000D_ 2E-122	(XP_005708762.1)_x000D_ 2.5E-44	XP_005708195.1_x000D_ 6E-115	(XP_005707572.1)_x000D_ 7.5E-110
Rhodophyta	Rhodophyta	Gracilariopsis chorda	NA_x000D_	NA_x000D_	PXF43436.1_x000D_ 4E-22	NA_x000D_	PXF43801.1_x000D_ 3.1E-152	(PXF49191.1)_x000D_ 2E-29	(PXF50023.1)_x000D_ 5.6E-88	(PXF50023.1)_x000D_ 7E-50	(PXF44812.1)_x000D_ 2E-26	NA_x000D_	(PXF47058.1)_x000D_ 3.8E-19	NA_x000D_	NA_x000D_	(PXF42134.1)_x000D_ 2.6E-244	(PXF43519.1)_x000D_ 3E-152	(PXF44201.1)_x000D_ 1E-68	(PXF45291.1)_x000D_ 3.2E-33	(PXF44780.1)_x000D_ 2E-115	(PXF47373.1)_x000D_ 5.1E-45	PXF40418.1_x000D_ 2E-124	(PXF49829.1)_x000D_ 6E-19
Rhodophyta	Rhodophyta	Porphyra umbilicalis	NA_x000D_	NA_x000D_	OSX72672.1_x000D_ 2E-22	NA_x000D_	NA_x000D_	(OSX78106.1)_x000D_ 8E-09	(OSX70081.1)_x000D_ 2.4E-50	(OSX70081.1)_x000D_ 5.2E-29	(OSX77596.1)_x000D_ 5E-13	NA_x000D_	(OSX69426.1)_x000D_ 3.5E-19	NA_x000D_	NA_x000D_	NA_x000D_	(OSX80345.1)_x000D_ 4E-144	(OSX80082.1)_x000D_ 2E-65	(YP_009413292.1)_x000D_ 4.7E-33	(OSX72184.1)_x000D_ 1E-96	(OSX71701.1)_x000D_ 5.5E-41	OSX74046.1_x000D_ 1E-12	(OSX71166.1)_x000D_ 3E-17
Amoebozoa	Amoebozoa	Dictyostelium discoideum AX4	(XP_644484.1)_x000D_ 2.1E-82	(XP_643944.1)_x000D_ 1.8E-111	XP_640934.1_x000D_ 1E-25	NA_x000D_	XP_636407.1_x000D_ 2.5E-107	(XP_001134577.1)_x000D_ 1E-38	(XP_640490.1)_x000D_ 8.5E-80	NA_x000D_	(XP_638739.1)_x000D_ 9E-16	NA_x000D_	(XP_646457.1)_x000D_ 7E-08	NA_x000D_	NA_x000D_	NA_x000D_	(XP_629073.2)_x000D_ 6E-66	(XP_637234.1)_x000D_ 8E-16	(XP_637234.1)_x000D_ 8E-16	NA_x000D_	NA_x000D_	XP_641531.1_x000D_ 2E-13	NA_x000D_
Amoebozoa	Amoebozoa	Acanthamoeba castellanii str. Neff	NA_x000D_	(XP_004352681.1)_x000D_ 9.4E-90	XP_004335853.1_x000D_ 6E-23	NA_x000D_	XP_004334741.1_x000D_ 2.5E-80	(XP_004338640.1)_x000D_ 9E-24	(XP_004338660.1)_x000D_ 3.6E-36	NA_x000D_	(XP_004340933.1)_x000D_ 3E-15	NA_x000D_	(XP_004356735.1)_x000D_ 3.5E-19	NA_x000D_	NA_x000D_	NA_x000D_	(XP_004356622.1)_x000D_ 3E-84	NA_x000D_ 9E-23	(XP_004333951.1)_x000D_ 9E-23	(XP_004344202.1)_x000D_ 2E-89	NA_x000D_	XP_004340035.1_x000D_ 4E-11	NA_x000D_
Amoebozoa	Amoebozoa	Cavenderia fasciculata	NA_x000D_	(XP_004350791.1)_x000D_ 1.6E-68	XP_004361018.1_x000D_ 5E-27	NA_x000D_	XP_004350011.1_x000D_ 3.1E-98	(XP_004362979.1)_x000D_ 5E-56	(XP_004361151.1)_x000D_ 3.1E-68	NA_x000D_	(XP_004360630.1)_x000D_ 1E-12	NA_x000D_	(XP_004350539.1)_x000D_ 2.5E-15	NA_x000D_	NA_x000D_	NA_x000D_	(XP_004358573.1)_x000D_ 4E-61	(XP_004350815.1)_x000D_ 6E-17	(XP_004350815.1)_x000D_ 6E-17	NA_x000D_	NA_x000D_	XP_004363123.1_x000D_ 4E-15	NA_x000D_
Amoebozoa	Amoebozoa	Tieghemostelium lacteum	(KYQ91196.1)_x000D_ 4.2E-94	(KYQ99985.1)_x000D_ 4E-09	KYR00638.1_x000D_ 1E-24	NA_x000D_	KYQ99957.1_x000D_ 1.1E-102	(KYQ90428.1)_x000D_ 3E-41	(KYQ93759.1)_x000D_ 2.4E-77	NA_x000D_	(KYR02888.1)_x000D_ 6E-17	NA_x000D_	(KYR00849.1)_x000D_ 1.2E-12	NA_x000D_	NA_x000D_	NA_x000D_	(KYR01856.1)_x000D_ 1E-65	(KYR01875.1)_x000D_ 4E-18	(KYR01875.1)_x000D_ 4E-18	NA_x000D_	NA_x000D_	KYQ93901.1_x000D_ 9E-15	NA_x000D_
Amoebozoa	Amoebozoa	Polysphondylium violaceum	(KAF2071393.1)_x000D_ 2.7E-84	(KAF2071393.1)_x000D_ 1.4E-120	KAF2073022.1_x000D_ 1E-27	NA_x000D_	KAF2076209.1_x000D_ 2E-103	(KAF2069106.1)_x000D_ 1E-54	(KAF2074971.1)_x000D_ 1.1E-68	NA_x000D_	(KAF2068692.1)_x000D_ 2E-13	NA_x000D_	(KAF2072769.1)_x000D_ 1.2E-20	NA_x000D_	NA_x000D_	NA_x000D_	(KAF2076679.1)_x000D_ 7E-67	(KAF2075908.1)_x000D_ 2E-19	(KAF2075908.1)_x000D_ 2E-19	NA_x000D_	NA_x000D_	KAF2075476.1_x000D_ 1E-12	NA_x000D_

## Sheet: Supplementary 3b
Supplementary 3b. Orthologues of AMT1 and AMT2 in selected species of apicomplexans
Species	AMT2		AMT1
	Accession No.	Annotation	Accession No.	Annotation
Plasmodium falciparum 3D7	XP_001349611.1	monocarboxylate transporter, putative	XP_001349611.1	monocarboxylate transporter, putative
	XP_002808960.1	monocarboxylate transporter, putative	XP_002808960.1	monocarboxylate transporter, putative
			XP_001352019.1	major facilitator superfamily-related transporter, putative
			XP_001350981.1	novel putative transporter 1, putative
Plasmodium yoelii	XP_724389.1	monocarboxylate transporter, putative	XP_724389.1	monocarboxylate transporter, putative
	XP_724638.1	monocarboxylate transporter, putative	XP_724638.1	monocarboxylate transporter, putative
	UEK52320.1	monocarboxylate transporter	UEK52320.1	monocarboxylate transporter
			XP_730565.2	apicomplexan amino acid transporter ApiAT2, putative
			XP_022811364.1	apicomplexan amino acid transporter ApiAT8, putative
Plasmodium berghei ANKA	XP_034419956.1	monocarboxylate transporter, putative	XP_034419956.1	monocarboxylate transporter, putative
	XP_034421244.1	monocarboxylate transporter, putative	XP_034421244.1	monocarboxylate transporter, putative
			XP_034421129.1	apicomplexan amino acid transporter ApiAT2, putative
			XP_034419809.1	apicomplexan amino acid transporter ApiAT8, putative
Besnoitia besnoiti	XP_029219429.1	transporter, major facilitator family protein	XP_029222491.1	transporter, major facilitator family protein
	XP_029222491.1	transporter, major facilitator family protein	XP_029219429.1	transporter, major facilitator family protein
	XP_029221826.1	hypothetical protein BESB_001590	XP_029221826.1	hypothetical protein BESB_001590
Neospora caninum Liverpool	XP_003880192.1	hypothetical protein NCLIV_006330	XP_003883574.1	hypothetical protein NCLIV_033285
	XP_003883574.1	hypothetical protein NCLIV_033285	XP_003880192.1	hypothetical protein NCLIV_006330
	XP_003882764.1	conserved hypothetical protein	CEL64898.1	TPA: transporter, major facilitator family protein
	CEL64898.1	TPA: transporter, major facilitator family protein	XP_003880327.1	hypothetical protein NCLIV_007670
	XP_003880327.1	hypothetical protein NCLIV_007670	XP_003882764.1	conserved hypothetical protein
Babesia bovis T2Bo	EDO05871.2	Major Facilitator Superfamily protein	EDO05871.2	Major Facilitator Superfamily protein
			XP_001609621.1	hypothetical protein
			XP_001609153.1	hypothetical protein
			XP_001609941.1	hypothetical protein
Babesia ovata	XP_028866145.1	membrane transporter protein, putative	XP_028866145.1	membrane transporter protein, putative
			XP_028868717.1	major facilitator superfamily MFS-1
			XP_028868697.1	major facilitator superfamily MFS-1
			XP_028867930.1	major facilitator superfamily member protein
Theileria parva strain Muguga	XP_763394.1	membrane transporter	XP_763394.1	membrane transporter
			XP_763569.1	hypothetical protein
			XP_763571.1	hypothetical protein
			XP_763574.1	hypothetical protein
Theileria annulata	XP_955060.1	membrane transporter, putative	XP_955060.1	membrane transporter, putative
			XP_955237.1	uncharacterized protein TA05125
			XP_955241.1	uncharacterized protein TA05155
			XP_955242.1	uncharacterized protein TA05160
			XP_955239.1	uncharacterized protein TA05145
Eimeria maxima	XP_013333502.1	hypothetical protein EMWEY_00025430	XP_013333502.1	hypothetical protein EMWEY_00025430
Eimeria mitis	XP_013353487.1	uncharacterized protein EMH_0062430	XP_013353487.1	uncharacterized protein EMH_0062430
	XP_013355423.1	ABC1 family beta-lactamase, putative	XP_013355423.1	ABC1 family beta-lactamase, putative
	XP_037877946.1	uncharacterized protein EMH_0099350	XP_037877946.1	uncharacterized protein EMH_0099350
Cryptosporidium andersoni	OII75628.1	hypothetical protein cand_030580	OII76283.1	major facilitator superfamily transporter
	OII76283.1	major facilitator superfamily transporter	OII75628.1	hypothetical protein cand_030580
Cryptosporidium bovis	KAH7650388.1	putative membrane associated transporter	KAH7647912.1	protein with signal peptide plus 12 transmembrane domain
	KAH7647912.1	protein with signal peptide plus 12 transmembrane domain	KAH7650388.1	putative membrane associated transporter
Cryptosporidium felis	KAF7459066.1	putative monocarboxylate transporter	KAF7459066.1	putative monocarboxylate transporter
Cryptosporidium hominis	OLQ17263.1	putative integral membrane protein	OLQ17263.1	putative integral membrane protein
	OLQ17917.1	putative integral membrane protein	OLQ17917.1	putative integral membrane protein
Cryptosporidium hominis TU502	XP_665259.1	hypothetical protein, partial	XP_665259.1	hypothetical protein, partial
	XP_666467.1	hypothetical protein	XP_666467.1	hypothetical protein
Cryptosporidium meleagridis	POM83625.1	Major Facilitator Superfamily protein	POM83625.1	Major Facilitator Superfamily protein
	POM82786.1	hypothetical protein CmeUKMEL1_04135	POM82786.1	hypothetical protein CmeUKMEL1_04135
Cryptosporidium muris RN66	XP_002141415.1	hypothetical protein	XP_002140924.1	major facilitator superfamily transporter
	XP_002140924.1	major facilitator superfamily transporter	XP_002141415.1	hypothetical protein
Cryptosporidium parvum Iowa II	XP_625645.1	protein with signal peptide plus 12 transmembrane domain domain protein, possible tranporter	XP_625645.1	protein with signal peptide plus 12 transmembrane domain domain protein, possible tranporter
	XP_628418.1	possible membrane associated transporter	XP_628418.1	possible membrane associated transporter
Cryptosporidium ryanae	KAH8741745.1	protein with signal peptide plus 12 transmembrane domain protein	KAH8741745.1	protein with signal peptide plus 12 transmembrane domain protein
	KAH8741680.1	hypothetical protein FG386_003654	KAH8741680.1	hypothetical protein FG386_003654
Cryptosporidium sp. chipmunk genotype I	KAH8585196.1	transporter with signal peptide plus 12 transmembrane domain	KAH8585196.1	transporter with signal peptide plus 12 transmembrane domain
	KAH8582474.1	membrane associated transporter	KAH8582474.1	membrane associated transporter
Cryptosporidium tyzzeri	TRY52250.1	Major facilitator superfamily domain containing protein	TRY52250.1	Major facilitator superfamily domain containing protein
	TRY50503.1	Uncharacterized Protein CTYZ_00000848	TRY50503.1	Uncharacterized Protein CTYZ_00000848
Cryptosporidium ubiquitum	XP_028873289.1	transporter protein	XP_028873289.1	transporter protein
	XP_028875338.1	uncharacterized protein cubi_02920	XP_028875338.1	uncharacterized protein cubi_02920
