# Supplementary material for: The Toxoplasma monocarboxylate transporters are involved in the metabolism within the apicoplast and are linked to parasite survival
Source: eLife. 2024 Mar 19;12:RP88866. doi: 10.7554/eLife.88866 (PMC10950331; doi:10.7554/eLife.88866)
Supplement: Supplementary file 4. — (a) Minimally processed datasets of metabolites detected by GC–MS and LC–MS in TIR1, AMT1-AID, AMT2-AID, and dKD lines induced by auxin for 18 hr. (b) Analysis of metabolites detected by GC–MS and LC–MS in the lines of TIR1, AMT1-AID, AMT2-AID, and dKD induced by auxin for 18 hr. [file elife-88866-supp4.xlsx]

## Sheet: Supplementary file 4a
Supplementary file 4a. Minimally processed datasets of metabolites detected by GCMS and LCMS in TIR1, AMT1-AID, AMT2-AID and dKD lines induced by auxin for 18 hours
name	rt(min)	mzmed	metabolites	Adduct	HMDB	KEGG	TIR1	TIR1	TIR1	AMT1-AID	AMT1-AID	AMT1-AID	AMT2-AID	AMT2-AID	AMT2-AID	dKD	dKD	dKD
M341T785	13.08	341.303	1-Monostearin	[M-H2O+H]+	HMDB0031075	-	0.399938	0.376944	0.18488	0.603379	0.473403	0.417548	0.685475	0.745535	0.572339	0.599236	0.750966	0.474453
M162T51	0.85	162.076	2-Aminoadipic acid	[M+H]+	HMDB0000510	C00956	0.620665	1.14025	0.897847	0.369711	0.715717	1.23631	0.333447	0.407921	0.843132	0.365431	0.37169	0.355039
20.91_174	20.91	174	5-Aminolevulinic acid	GCMS	HMDB0001149	C00430	0.0430521	0.191689	0.12123	0.00952376	0.145455	0.13461	0.137728	0.178128	0.587625	0.390798	0.254594	0.29084
M204T69	1.15	204.123	Acetylcarnitine	[M+H]+	HMDB0000201	C02571	12.7222	15.6856	13.1201	4.52675	7.42799	10.4058	10.7901	8.86363	13.8322	8.30307	6.82834	6.9422
M146T49	0.82	146.117	Acetylcholine	[M+H]+	HMDB0000895	C01996	4.42364	3.741	2.4877	2.18067	2.29041	4.41775	2.21848	1.31084	2.25724	1.47531	0.756731	0.924378
M134T47	0.79	134.045	Aspartic acid	[M+H]+	HMDB0000191	C00049	4.77454	3.88893	3.31036	1.40581	1.94273	1.28002	2.93675	2.41001	0.92478	3.47468	1.20664	1.29409
M662T83	1.38	662.098	beta-Nicotinamide adenine dinucleotide	[M-H]-	HMDB0000902	C00003	5.14747	6.7356	5.95962	2.63222	4.459	5.93601	2.78271	2.49907	3.12237	2.29165	1.67463	2.50881
M232T300	5	232.154	Butyrylcarnitine	[M+H]+	HMDB0002013	C02862	0.567746	1.03585	0.762576	0.199767	0.547724	1.06466	0.251229	0.239197	0.715845	0.260089	0.233111	0.340011
M162T48	0.79	162.112	Carnitine	[M+H]+	HMDB0000062	C00318	11.0978	10.1153	5.82739	5.18466	6.27982	9.0556	6.22119	4.21109	6.36429	5.20301	2.87989	2.39682
31.63_129	31.63	129	Cholesterol	GCMS	HMDB0000067	C00187	6.87924	6.42883	6.82195	2.15462	3.21077	3.20888	1.52869	1.66315	3.54307	1.66525	2.22355	2.77908
M132T50	0.83	132.076	Creatine	[M+H]+	HMDB0000064	C00300	56.9703	105.736	90.9656	24.8532	40.2489	59.2097	33.4968	26.9174	54.6408	31.8615	21.6299	26.354
M324T52	0.86	324.059	Cytidine 5'-monophosphate	[M+H]+	HMDB0000095	C00055	0.0121025	0.0116802	0.00989245	0.023132	0.0454564	0.0470467	0.042109	0.0134471	0.0389935	0.00590808	0.0151767	0.0321163
23.27_333	23.27	333	Galacturonic acid	GCMS	HMDB0002545	C08348	0.00933303	0.0192616	0.0129532	0.00194301	0.00440017	0.0123214	0.00122194	0.00372447	0.0103838	0.00214487	0.00626536	0.00175094
17.29_174	17.29	174	gamma-Aminobutyric acid	GCMS	HMDB0000112	C00334	4.66536	10.2262	10.9269	2.64669	3.60565	27.8054	1.7106	1.77514	34.6099	1.32175	1.49804	3.80993
M275T39	0.66	275.089	gamma-Glutamylglutamic acid	[M-H]-	HMDB0011737	C05282	12.8842	14.3644	14.337	7.26579	7.18849	14.9025	5.02877	8.89335	14.9507	8.3843	2.93149	4.79079
M276T52	0.86	276.119	gamma-Glutamylglutamine	[M+H]+	HMDB0011738	C05283	1.02268	1.86089	1.40664	0.177791	0.911894	1.95571	0.755403	1.16643	1.13719	0.717939	0.824368	0.473588
M259T115	1.92	259.129	gamma-Glutamylisoleucine	[M-H]-	HMDB0011170	-	0.14944	0.323853	0.354038	0.0523448	0.128495	0.332502	0.0833107	0.0749936	0.282051	0.0825661	0.0672152	0.102497
M259T132	2.2	259.129	gamma-Glutamylleucine	[M-H]-	HMDB0011171	-	0.217638	0.519758	0.432531	0.0888356	0.241424	0.442914	0.153081	0.0960853	0.465711	0.154998	0.108898	0.142204
M263T71	1.18	263.086	Glutamylaspartic acid	[M+H]+	HMDB0028815	-	3.26139	3.03431	3.07733	1.23156	1.13216	3.07359	1.33697	0.891567	2.56978	1.36169	0.733261	0.721347
23.61_292	23.61	292	Gluconic acid	GCMS	HMDB0000625	C00257	0.148497	0.303897	0.248519	0.0477606	0.141408	0.253079	0.0571487	0.0917051	0.340209	0.0635924	0.108943	0.0989867
M148T48	0.79	148.06	Glutamic acid	[M+H]+	HMDB0000148	C00025	65.6988	100.336	82.0403	44.5039	46.9846	45.4192	57.5621	51.873	19.5754	54.1153	33.5814	30.1721
M247T339	5.65	247.128	Glutamylvaline	[M+H]+	HMDB0028832	-	0.147412	0.421422	0.449132	0.0413362	0.122423	0.363362	0.0702154	0.0800608	0.272388	0.0537591	0.0554772	0.0687085
M306T46	0.77	306.075	Glutathione (reduced)	[M-H]-	HMDB0000125	C00051	24.4689	52.9448	38.6418	13.178	19.3156	39.1719	0.0886121	19.5538	26.2415	7.83979	15.5494	11.2455
M189T295	4.92	189.122	Glycylleucine	[M+H]+	HMDB0000759	C02155	0.476062	0.540422	0.740076	0.0732726	0.630715	0.28142	0.0814843	0.156922	0.338519	0.0928123	0.223605	0.310442
M261T136	2.26	261.108	Hydroxyprolyl-Glutamate	[M+H]+	HMDB0028862	-	0.347573	1.0796	1.1706	0.092615	0.29425	0.693674	0.16345	0.195884	0.64366	0.0889006	0.126601	0.121288
M245T422	7.03	245.148	Hydroxyprolyl-Leucine	[M+H]+	HMDB0028867	-	0.357591	0.831484	0.680555	0.0917337	0.238533	0.582899	0.121366	0.118426	0.418857	0.146687	0.162774	0.110678
18.54_188	18.54	188	Hypotaurine	GCMS	HMDB0000965	C00519	1.1534	2.40239	1.83869	0.380541	1.00702	2.34416	0.70237	0.540698	2.25734	0.690283	0.561628	0.846549
M232T293	4.88	232.154	Isobutyrylcarnitine	[M+H]+	HMDB0000736	-	0.10245	0.288816	0.300069	0.0416298	0.110223	0.133769	0.0555723	0.0365555	0.117501	0.032753	0.0365718	0.0749346
M89T44	0.73	89.024	Lactic acid	[M-H]-	HMDB0000190	C00186	2.84084	4.52089	4.13353	1.35678	1.75904	2.61837	2.09495	1.41869	1.47675	1.13116	1.41882	1.19362
M496T747	12.45	496.336	LPC 16:0	[M+H]+	-	-	2.16064	3.04521	2.67276	1.73405	2.96221	1.37222	1.69993	0.420135	1.16911	2.24992	1.65703	1.84038
M571T684	11.39	571.285	LPI 16:0	[M-H]-	-	-	1.14991	2.17615	1.56934	0.542765	1.47482	1.69119	0.673948	0.52086	1.22188	0.617123	0.489163	0.663909
22.06_285	22.06	285	Myristic acid	GCMS	HMDB0000806	C06424	0.361743	0.418114	0.274494	0.249072	0.199591	0.205678	0.197574	0.152533	0.178349	0.16236	0.182296	0.164806
M203T50	0.83	203.15	N,N-Dimethylarginine	[M+H]+	HMDB0001539	C03626	3.817	4.94084	4.33865	1.80765	4.0532	3.60378	2.66152	2.93999	2.91677	2.76296	2.37975	2.65229
M189T44	0.73	189.16	N6,N6,N6-Trimethyllysine	[M+H]+	-	-	15.0635	15.9611	11.3178	8.25835	9.14875	22.3186	10.4763	10.0841	17.1747	10.3129	6.50928	6.00831
M188T39	0.66	188.056	N-Acetylglutamic acid	[M-H]-	HMDB0001138	C00624	1.59774	1.81915	1.6304	0.979745	1.10701	1.62556	1.06678	1.35991	1.89516	1.07463	1.238	0.97283
8.31_174	8.31	174	n-Butylamine	GCMS	HMDB0031321	-	1.26254	1.15936	0.793525	1.33964	1.26696	1.3216	2.65301	2.59681	1.51124	2.88791	2.38792	1.41787
M365T771	12.85	365.341	Nervonic acid	[M-H]-	HMDB0002368	C08323	5.11458	5.90875	5.16379	2.54095	6.20725	7.0127	3.1958	2.81865	7.41684	3.03619	3.23067	4.46735
23.97_311	23.97	311	Palmitoleic acid	GCMS	HMDB0003229	C08362	0.119852	0.166806	0.0789162	0.0520628	0.0594449	0.0770238	0.0401395	0.0315399	0.0698187	0.0336262	0.0356013	0.0419425
23.58_291	23.58	291	Pantothenic acid	GCMS	HMDB0000210	C00864	0.074399	0.151127	0.113271	0.0284197	0.0589309	0.135921	0.0411552	0.0535506	0.109336	0.0320364	0.0511933	0.0471688
M679T835	13.92	678.502	PC 28:0|PC 14:0_14:0	[M+H]+	-	-	7.23378	10.0037	7.4708	6.32915	6.76394	12.0394	5.25702	4.02421	7.90583	5.42509	3.61664	3.63886
M693T846	14.11	692.521	PC 29:0|PC 14:0_15:0	[M+H]+	-	-	1.73219	1.54526	1.40765	1.08954	0.827694	1.55293	1.18951	0.534817	1.31908	0.871902	0.674652	0.897615
M707T860	14.33	706.534	PC 30:0|PC 14:0_16:0	[M+H]+	-	-	31.7892	28.2575	28.852	14.5122	13.5018	20.1975	15.5273	11.1955	21.082	12.377	10.3311	11.3689
M705T839	13.99	704.516	PC 30:1|PC 14:0_16:1	[M+H]+	-	-	7.09349	7.75877	6.01126	6.72025	6.80297	10.4934	5.42477	4.32568	8.04911	5.07743	3.79427	4.6982
M721T874	14.56	720.553	PC 31:0|PC 14:0_17:0	[M+H]+	-	-	0.933946	0.748607	0.755953	0.51689	0.867341	0.629519	0.300181	0.488177	0.557564	0.442196	0.541801	0.461814
M719T851	14.18	718.531	PC 31:1|PC 15:0_16:1	[M+H]+	-	-	1.70439	1.51678	1.09056	0.985037	0.946338	1.55632	1.09403	0.287343	1.30294	0.767066	0.619715	0.895238
M731T844	14.07	730.536	PC 32:2|PC 16:1_16:1	[M+H]+	-	-	5.0544	5.38445	6.43165	3.96897	4.08318	6.05711	3.79691	2.56492	5.69605	3.00769	2.98283	2.74015
M747T877	14.62	746.565	PC 33:1|PC 17:0_16:1	[M+H]+	-	-	2.68108	2.54134	2.66821	1.49527	2.67883	1.9201	1.00995	1.4417	1.77262	1.10409	1.23243	1.57346
M759T868	14.47	758.568	PC 34:2|PC 16:1_18:1	[M+H]+	-	-	17.4311	16.8531	15.4047	13.1426	16.9118	15.5691	10.9985	12.3433	14.1091	12.967	12.8852	11.907
M811T885	14.74	810.598	PC 38:4|PC 18:1_20:3	[M+H]+	-	-	4.43848	2.30058	2.55606	0.899685	1.95908	2.16508	0.945369	1.15368	1.65138	0.651263	0.763986	0.959558
M809T870	14.5	808.584	PC 38:5|PC 18:1_20:4	[M+H]+	-	-	11.1019	7.22955	8.27177	6.0995	6.32495	5.49815	4.99299	6.63036	5.84811	4.76533	5.67803	5.14949
M835T874	14.56	834.593	PC 40:6|PC 18:1_22:5	[M+H]+	-	-	3.81626	2.81191	3.00222	1.68413	1.85182	2.22945	1.57929	1.80301	1.8579	1.0307	1.09659	1.24716
M833T864	14.4	832.584	PC 40:7|PC 18:2_22:5	[M+H]+	-	-	1.72695	1.58653	1.49454	1.1237	1.17497	1.85724	1.00215	1.04172	1.59951	0.867763	1.11254	1.03377
M715T821	13.69	714.506	PE 34:2|PE 16:1_18:1	[M-H]-	-	-	4.1548	3.48454	1.24917	3.06938	1.71773	0.253089	0.822126	1.95762	0.224675	0.539009	0.524915	0.122164
M745T780	13	744.547	PE 36:2|PE 18:1_18:1	[M+H]+	-	-	4.64584	2.79641	3.01495	2.16105	0.457491	0.910535	4.39141	0.499556	0.601246	1.78999	0.356923	0.908869
M218T143	2.38	218.138	Propionylcarnitine	[M+H]+	HMDB0000824	C03017	2.16845	4.96086	3.78976	0.900605	2.16061	3.70813	1.14101	0.701629	2.86554	0.606526	0.939129	0.976342
M130T88	1.47	130.05	Pyroglutamic acid	[M+H]+	HMDB0000267	C01879	16.8171	32.4454	28.3399	7.11925	17.0203	22.4814	12.517	13.0809	15.4116	10.644	12.5359	12.37
21.13_292	21.13	292	Ribonic acid	GCMS	HMDB0000867	C01685	0.00810119	0.00608617	0.00486339	0.000537321	0.00316808	0.000497023	0.00506626	0.00272041	0.00798506	0.00656648	0.0129021	0.00408577
8.6_116	8.6	116	Sarcosine	GCMS	HMDB0000271	C00213	0.0189676	1.54428	42.46	78.9936	59.0666	56.5407	79.5976	72.6883	59.4897	79.0557	56.1922	57.9669
M338T69	1.14	338.1	S-Hydroxymethylglutathione	[M+H]+	HMDB0004662	C14180	2.61209	1.3581	2.91819	0.752372	0.237467	2.80626	0.00332165	2.10366	2.79165	0.136022	0.386441	0.317886
12.83_247	12.83	247	Succinic acid	GCMS	HMDB0000254	C00042	0.37407	0.838446	0.787368	0.175547	0.159009	0.341287	0.251999	0.191278	0.17727	0.242501	0.184361	0.146971
M124T44	0.73	124.007	Taurine	[M-H]-	HMDB0000251	C00245	32.6352	34.5176	24.7782	16.1431	17.8854	35.5639	23.4649	13.7173	31.7409	21.8062	9.22686	12.4
17.55_292	17.55	292	Threonic acid	GCMS	HMDB0000943	C01620	0.0665217	0.078593	0.0614797	0.0280246	0.0453221	0.0624099	0.0190636	0.0299765	0.0493275	0.0393762	0.0377789	0.0210803
25.74_339	25.74	339	trans-Oleic acid	GCMS	HMDB0000573	C01712	0.96305	0.899191	0.46088	0.448336	0.341361	0.410191	0.324852	0.238003	0.431223	0.227698	0.258128	0.259159
M113T66	1.1	113.034	Uracil	[M+H]+	HMDB0000300	C00106	4.19782	4.75673	5.5153	4.14926	4.08626	3.80951	0.770056	3.83887	0.894849	3.85331	1.87378	0.910433
M246T354	5.9	246.169	Valerylcarnitine	[M+H]+	HMDB0013128	-	0.975605	2.76931	2.38175	0.461691	0.934402	1.57609	0.655789	0.476327	1.29481	0.414407	0.443614	0.605607

## Sheet: Supplementary file 4b
Supplementary file 4b. Analysis of metabolites detected by GCMS and LCMS in the lines of TIR1, AMT1-AID, AMT2-AID and dKD induced by auxin for 18 hours
			log2FC			P value			Mean					datasets of differential metabolites
metabolites	HMDB	KEGG	log2AB	log2AC	log2AD	P(B - A)	P(C - A)	P(D - A)	TIR1 (A)	AMT1 (B)	AMT2 (C)	dKD (D)	Trend	TIR1 (A)	TIR1 (A)	TIR1 (A)	AMT1 (B)	AMT1 (B)	AMT1 (B)	AMT2 (C)	AMT2 (C)	AMT2 (C)	dKD (D)	dKD (D)	dKD (D)
1-Monostearin	HMDB0031075	-	0.635746	1.05866	0.923872	0.197571	0.0130843	0.0334825	0.320587	0.49811	0.667783	0.608218		0.399938	0.376944	0.18488	0.603379	0.473403	0.417548	0.685475	0.745535	0.572339	0.599236	0.750966	0.474453
2-Aminoadipic acid	HMDB0000510	C00956	-0.195552	-0.746728	-1.28357	0.931925	0.354198	0.133893	0.886255	0.773912	0.528167	0.364053		0.620665	1.14025	0.897847	0.369711	0.715717	1.23631	0.333447	0.407921	0.843132	0.365431	0.37169	0.355039
5-Aminolevulinic acid	HMDB0001149	C00430	-0.297749	1.34373	1.39511	0.994501	0.318742	0.280593	0.118657	0.0965299	0.30116	0.312077		0.0430521	0.191689	0.12123	0.00952376	0.145455	0.13461	0.137728	0.178128	0.587625	0.390798	0.254594	0.29084
Acetylcarnitine	HMDB0000201	C02571	-0.893123	-0.310525	-0.911758	0.0157442	0.344506	0.0143392	13.8426	7.45352	11.162	7.35787		12.7222	15.6856	13.1201	4.52675	7.42799	10.4058	10.7901	8.86363	13.8322	8.30307	6.82834	6.9422
Acetylcholine	HMDB0000895	C01996	-0.261105	-0.880394	-1.75481	0.747631	0.118	0.0189885	3.55078	2.96294	1.92885	1.05214		4.42364	3.741	2.4877	2.18067	2.29041	4.41775	2.21848	1.31084	2.25724	1.47531	0.756731	0.924378
Aspartic acid	HMDB0000191	C00049	-1.37125	-0.932994	-1.00278	0.0286582	0.0846181	0.070161	3.99128	1.54285	2.09051	1.9918		4.77454	3.88893	3.31036	1.40581	1.94273	1.28002	2.93675	2.41001	0.92478	3.47468	1.20664	1.29409
beta-Nicotinamide adenine dinucleotide	HMDB0000902	C00003	-0.453803	-1.08616	-1.46236	0.168355	0.00948331	0.00335457	5.94756	4.34241	2.80139	2.15836		5.14747	6.7356	5.95962	2.63222	4.459	5.93601	2.78271	2.49907	3.12237	2.29165	1.67463	2.50881
Butyrylcarnitine	HMDB0002013	C02862	-0.384854	-0.972	-1.5058	0.769493	0.289939	0.135363	0.788723	0.604049	0.40209	0.277737		0.567746	1.03585	0.762576	0.199767	0.547724	1.06466	0.251229	0.239197	0.715845	0.260089	0.233111	0.340011
Carnitine	HMDB0000062	C00318	-0.398084	-0.686954	-1.36752	0.437363	0.15343	0.0222012	9.01349	6.84002	5.59886	3.49324		11.0978	10.1153	5.82739	5.18466	6.27982	9.0556	6.22119	4.21109	6.36429	5.20301	2.87989	2.39682
Cholesterol	HMDB0000067	C00187	-1.23126	-1.57962	-1.59405	0.000244963	0.000106842	0.000161847	6.71001	2.85809	2.24497	2.22263		6.87924	6.42883	6.82195	2.15462	3.21077	3.20888	1.52869	1.66315	3.54307	1.66525	2.22355	2.77908
Creatine	HMDB0000064	C00300	-1.029	-1.14064	-1.66768	0.0358165	0.025914	0.00783747	84.5574	41.4373	38.3517	26.6151		56.9703	105.736	90.9656	24.8532	40.2489	59.2097	33.4968	26.9174	54.6408	31.8615	21.6299	26.354
Cytidine 5'-monophosphate	HMDB0000095	C00055	1.77982	1.48939	0.659774	0.0628463	0.177175	0.853972	0.011225	0.038545	0.0315165	0.0177337		0.0121025	0.0116802	0.00989245	0.023132	0.0454564	0.0470467	0.042109	0.0134471	0.0389935	0.00590808	0.0151767	0.0321163
Galacturonic acid	HMDB0002545	C08348	-1.15447	-1.43839	-2.03171	0.170856	0.110708	0.0557776	0.0138493	0.00622152	0.00511007	0.00338706		0.00933303	0.0192616	0.0129532	0.00194301	0.00440017	0.0123214	0.00122194	0.00372447	0.0103838	0.00214487	0.00626536	0.00175094
gamma-Aminobutyric acid (GABA)	HMDB0000112	C00334	-1.58728	-2.24785	-1.96138	0.0143211	0.00580944	0.0077717	8.60615	2.86411	1.81191	2.20991		4.66536	10.2262	10.9269	2.64669	3.60565	2.34234	1.7106	1.77514	1.95203	1.32175	1.49804	3.80993
gamma-Glutamylglutamic acid	HMDB0011737	C05282	-0.502392	-0.526371	-1.36843	0.426583	0.399008	0.0516384	13.8619	9.78558	9.62428	5.36886		12.8842	14.3644	14.337	7.26579	7.18849	14.9025	5.02877	8.89335	14.9507	8.3843	2.93149	4.79079
gamma-Glutamylglutamine	HMDB0011738	C05283	-0.494418	-0.487974	-1.08963	0.651476	0.658449	0.241032	1.43007	1.01513	1.01968	0.671965		1.02268	1.86089	1.40664	0.177791	0.911894	1.95571	0.755403	1.16643	1.13719	0.717939	0.824368	0.473588
gamma-Glutamylisoleucine	HMDB0011170	-	-0.688544	-0.909793	-1.71345	0.533649	0.384881	0.144827	0.275777	0.171114	0.146785	0.0840927		0.14944	0.323853	0.354038	0.0523448	0.128495	0.332502	0.0833107	0.0749936	0.282051	0.0825661	0.0672152	0.102497
gamma-Glutamylleucine	HMDB0011171	-	-0.597554	-0.71065	-1.52651	0.615016	0.521736	0.178996	0.389976	0.257724	0.238292	0.135367		0.217638	0.519758	0.432531	0.0888356	0.241424	0.442914	0.153081	0.0960853	0.465711	0.154998	0.108898	0.142204
Glu-asp	HMDB0028815	-	-0.785621	-0.965988	-1.73472	0.133668	0.0779396	0.0154174	3.12434	1.81244	1.59944	0.938765		3.26139	3.03431	3.07733	1.23156	1.13216	3.07359	1.33697	0.891567	2.56978	1.36169	0.733261	0.721347
Gluconic acid	HMDB0000625	C00257	-0.66438	-0.519214	-1.36816	0.618393	0.736217	0.268189	0.233638	0.147416	0.163021	0.0905075		0.148497	0.303897	0.248519	0.0477606	0.141408	0.253079	0.0571487	0.0917051	0.340209	0.0635924	0.108943	0.0989867
Glutamic acid	HMDB0000148	C00025	-0.857572	-0.943288	-1.0736	0.0393678	0.0287336	0.0184186	82.6916	45.6359	43.0035	39.2896		65.6988	100.336	82.0403	44.5039	46.9846	45.4192	57.5621	51.873	19.5754	54.1153	33.5814	30.1721
Glutamylvaline	HMDB0028832	-	-0.949482	-1.26811	-2.51619	0.350573	0.225792	0.0743808	0.339322	0.175707	0.140888	0.059315		0.147412	0.421422	0.449132	0.0413362	0.122423	0.363362	0.0702154	0.0800608	0.272388	0.0537591	0.0554772	0.0687085
Glutathione (reduced)	HMDB0000125	C00051	-0.695464	-1.33875	-1.74452	0.364659	0.107107	0.061056	38.6852	23.8885	15.2947	11.5449		24.4689	52.9448	38.6418	13.178	19.3156	39.1719	0.0886121	19.5538	26.2415	7.83979	15.5494	11.2455
Glycylleucine	HMDB0000759	C02155	-0.83396	-1.6063	-1.48654	0.255785	0.065858	0.0779352	0.58552	0.328469	0.192309	0.208953		0.476062	0.540422	0.740076	0.0732726	0.630715	0.28142	0.0814843	0.156922	0.338519	0.0928123	0.223605	0.310442
Hydroxyprolyl-Glutamate	HMDB0028862	-	-1.26552	-1.37296	-2.94736	0.172989	0.148846	0.0394509	0.865924	0.36018	0.334331	0.112263		0.347573	1.0796	1.1706	0.092615	0.29425	0.693674	0.16345	0.195884	0.64366	0.0889006	0.126601	0.121288
Hydroxyprolyl-Leucine	HMDB0028867	-	-1.0338	-1.50517	-2.15381	0.183333	0.0840415	0.0402217	0.62321	0.304389	0.219549	0.140046		0.357591	0.831484	0.680555	0.0917337	0.238533	0.582899	0.121366	0.118426	0.418857	0.146687	0.162774	0.110678
Hypotaurine	HMDB0000965	C00519	-0.531642	-0.623962	-1.36215	0.711388	0.633665	0.253516	1.79816	1.24391	1.1668	0.699486		1.1534	2.40239	1.83869	0.380541	1.00702	2.34416	0.70237	0.540698	2.25734	0.690283	0.561628	0.846549
Isobutyrylcarnitine	HMDB0000736	-	-1.27528	-1.72155	-2.26072	0.0819963	0.0409567	0.0221125	0.230445	0.0952072	0.0698763	0.0480865		0.10245	0.288816	0.300069	0.0416298	0.110223	0.133769	0.0555723	0.0365555	0.117501	0.032753	0.0365718	0.0749346
Lactic acid	HMDB0000190	C00186	-1.00337	-1.20382	-1.61854	0.00957573	0.00480718	0.00154582	3.83175	1.9114	1.66346	1.24787		2.84084	4.52089	4.13353	1.35678	1.75904	2.61837	2.09495	1.41869	1.47675	1.13116	1.41882	1.19362
LPC 16:0	-	-	-0.376604	-1.26022	-0.45505	0.492593	0.0328203	0.375897	2.6262	2.02283	1.09639	1.91578		2.16064	3.04521	2.67276	1.73405	2.96221	1.37222	1.69993	0.420135	1.16911	2.24992	1.65703	1.84038
LPI 16:0	-	-	-0.400482	-1.0184	-1.46752	0.584689	0.120547	0.0495557	1.6318	1.23626	0.805562	0.590065		1.14991	2.17615	1.56934	0.542765	1.47482	1.69119	0.673948	0.52086	1.22188	0.617123	0.489163	0.663909
Myristic acid	HMDB0000806	C06424	-0.688242	-0.996501	-1.04931	0.00955692	0.001701	0.00144525	0.35145	0.218113	0.176152	0.169821		0.361743	0.418114	0.274494	0.249072	0.199591	0.205678	0.197574	0.152533	0.178349	0.16236	0.182296	0.164806
N,N-Dimethylarginine	HMDB0001539	C03626	-0.468562	-0.620549	-0.748561	0.207744	0.620074	0.0851544	4.3655	3.15488	2.83942	2.59833		3.817	4.94084	4.33865	1.80765	4.0532	3.60378	2.66152	2.93999	2.91677	2.76296	2.37975	2.65229
N6,N6,N6-Trimethyllysine	-	-	-0.0920301	-0.166197	-0.89114	0.891824	0.052478	0.0568473	14.1141	13.2419	12.5784	7.61016		15.0635	15.9611	11.3178	8.25835	9.14875	22.3186	10.4763	10.0841	17.1747	10.3129	6.50928	6.00831
N-Acetylglutamic acid	HMDB0001138	C00624	-0.443187	-0.223857	-0.619411	0.133851	0.0568716	0.02936	1.68243	1.23744	1.44062	1.09515		1.59774	1.81915	1.6304	0.979745	1.10701	1.62556	1.06678	1.35991	1.89516	1.07463	1.238	0.97283
n-Butylamine	HMDB0031321	-	0.288855	1.07224	1.05779	0.991424	0.957868	0.284371	1.07181	1.3094	2.25369	2.23123		1.26254	1.15936	0.793525	1.33964	1.26696	1.3216	2.65301	2.59681	1.51124	2.88791	2.38792	1.41787
Nervonic acid	HMDB0002368	C08323	-0.038497	-0.269248	-0.59263	0.999303	0.866521	0.501426	5.39571	5.25363	4.4771	3.57807		5.11458	5.90875	5.16379	2.54095	6.20725	7.0127	3.1958	2.81865	7.41684	3.03619	3.23067	4.46735
Palmitoleic acid	HMDB0003229	C08362	-0.955356	-1.36938	-1.71739	0.049957	0.0164729	0.00820735	0.121858	0.0628438	0.047166	0.0370567		0.119852	0.166806	0.0789162	0.0520628	0.0594449	0.0770238	0.0401395	0.0315399	0.0698187	0.0336262	0.0356013	0.0419425
Pantothenic acid	HMDB0000210	C00864	-0.601625	-0.731554	-1.37749	0.508994	0.398978	0.136125	0.112932	0.0744237	0.0680141	0.0434662		0.074399	0.151127	0.113271	0.0284197	0.0589309	0.135921	0.0411552	0.0535506	0.109336	0.0320364	0.0511933	0.0471688
PC 28:0|PC 14:0_14:0	-	-	0.0245564	-0.523674	-0.962375	0.999558	0.377223	0.109714	8.23611	8.3775	5.72902	4.22686		7.23378	10.0037	7.4708	6.32915	6.76394	12.0394	5.25702	4.02421	7.90583	5.42509	3.61664	3.63886
PC 29:0|PC 14:0_15:0	-	-	-0.433076	-0.622391	-0.938737	0.290104	0.125876	0.0370772	1.5617	1.15672	1.01447	0.814723		1.73219	1.54526	1.40765	1.08954	0.827694	1.55293	1.18951	0.534817	1.31908	0.871902	0.674652	0.897615
PC 30:0|PC 14:0_16:0	-	-	-0.882784	-0.89501	-1.38336	0.00242817	0.00235489	0.000293545	29.6329	16.0705	15.9349	11.359		31.7892	28.2575	28.852	14.5122	13.5018	20.1975	15.5273	11.1955	21.082	12.377	10.3311	11.3689
PC 30:1|PC 14:0_16:1	-	-	0.203048	-0.229141	-0.620572	0.747069	0.761348	0.202114	6.95451	8.00552	5.93319	4.5233		7.09349	7.75877	6.01126	6.72025	6.80297	10.4934	5.42477	4.32568	8.04911	5.07743	3.79427	4.6982
PC 31:0|PC 14:0_17:0	-	-	-0.276114	-0.857403	-0.754119	0.424133	0.0190855	0.0306379	0.812835	0.67125	0.448641	0.481937		0.933946	0.748607	0.755953	0.51689	0.867341	0.629519	0.300181	0.488177	0.557564	0.442196	0.541801	0.461814
PC 31:1|PC 15:0_16:1	-	-	-0.305994	-0.683714	-0.917956	0.687183	0.22969	0.119438	1.43724	1.16256	0.894771	0.760673		1.70439	1.51678	1.09056	0.985037	0.946338	1.55632	1.09403	0.287343	1.30294	0.767066	0.619715	0.895238
PC 32:2|PC 16:1_16:1	-	-	-0.25786	-0.484527	-0.950338	0.597648	0.219383	0.032691	5.6235	4.70309	4.01929	2.91023		5.0544	5.38445	6.43165	3.96897	4.08318	6.05711	3.79691	2.56492	5.69605	3.00769	2.98283	2.74015
PC 33:1|PC 17:0_16:1	-	-	-0.372703	-0.90144	-1.01298	0.198924	0.0103543	0.00669151	2.63021	2.0314	1.40809	1.30333		2.68108	2.54134	2.66821	1.49527	2.67883	1.9201	1.00995	1.4417	1.77262	1.10409	1.23243	1.57346
PC 34:2|PC 16:1_18:1	-	-	-0.12315	-0.407924	-0.396097	0.515529	0.0164666	0.0188037	16.563	15.2078	12.4837	12.5864		17.4311	16.8531	15.4047	13.1426	16.9118	15.5691	10.9985	12.3433	14.1091	12.967	12.8852	11.907
PC 38:4|PC 18:1_20:3	-	-	-0.887679	-1.30942	-1.96866	0.090627	0.0304217	0.00988865	3.09837	1.67462	1.25014	0.791603		4.43848	2.30058	2.55606	0.899685	1.95908	2.16508	0.945369	1.15368	1.65138	0.651263	0.763986	0.959558
PC 38:5|PC 18:1_20:4	-	-	-0.569823	-0.606603	-0.770717	0.0339955	0.0263156	0.00981789	8.86775	5.9742	5.82382	5.19762		11.1019	7.22955	8.27177	6.0995	6.32495	5.49815	4.99299	6.63036	5.84811	4.76533	5.67803	5.14949
PC 40:6|PC 18:1_22:5	-	-	-0.740173	-0.877971	-1.51294	0.00301847	0.000946953	0.000119616	3.21013	1.9218	1.74674	1.12482		3.81626	2.81191	3.00222	1.68413	1.85182	2.22945	1.57929	1.80301	1.8579	1.0307	1.09659	1.24716
PC 40:7|PC 18:2_22:5	-	-	-0.210275	-0.40016	-0.673724	0.670007	0.27388	0.0714598	1.60267	1.38531	1.21446	1.00469		1.72695	1.58653	1.49454	1.1237	1.17497	1.85724	1.00215	1.04172	1.59951	0.867763	1.11254	1.03377
PE 34:2|PE 16:1_18:1	-	-	-0.81846	-1.56485	-2.90573	0.418146	0.153409	0.0581068	2.96284	1.68007	1.00147	0.395363		4.1548	3.48454	1.24917	3.06938	1.71773	0.253089	0.822126	1.95762	0.224675	0.539009	0.524915	0.122164
PE 36:2|PE 18:1_18:1	-	-	-1.56713	-0.929038	-1.77488	0.157293	0.359894	0.128232	3.48573	1.17636	1.83074	1.01859		4.64584	2.79641	3.01495	2.16105	0.457491	0.910535	4.39141	0.499556	0.601246	1.78999	0.356923	0.908869
Propionylcarnitine	HMDB0000824	C03017	-0.689761	-1.21361	-2.11421	0.375678	0.136064	0.0431964	3.63969	2.25645	1.56939	0.840665		2.16845	4.96086	3.78976	0.900605	2.16061	3.70813	1.14101	0.701629	2.86554	0.606526	0.939129	0.976342
Pyroglutamic acid	HMDB0000267	C01879	-0.735124	-0.920144	-1.12626	0.132681	0.0730383	0.0413697	25.8675	15.5403	13.6698	11.8499		16.8171	32.4454	28.3399	7.11925	17.0203	22.4814	12.517	13.0809	15.4116	10.644	12.5359	12.37
Ribonic acid	HMDB0000867	C01685	-2.18055	-0.272507	0.306143	0.153313	0.934713	0.856548	0.00635025	0.00140081	0.00525724	0.00785144		0.00810119	0.00608617	0.00486339	0.000537321	0.00316809	0.000497023	0.00506626	0.00272041	0.00798506	0.00656648	0.0129021	0.00408577
Sarcosine	HMDB0000271	C00213	2.14418	2.2662	2.13387	0.53939	0.796092	0.120133	14.6744	64.867	70.5919	64.4049		0.0189676	1.54428	42.46	78.9936	59.0666	56.5407	79.5976	72.6883	59.4897	79.0557	56.1922	57.9669
S-Hydroxymethylglutathione	HMDB0004662	C14180	-0.859646	-0.491784	-3.0351	0.0117087	0.00629496	0.0122694	2.29613	1.26537	1.63288	0.280116		2.61209	1.3581	2.91819	0.752372	0.237467	2.80626	0.00332165	2.10366	2.79165	0.136022	0.386441	0.317886
Succinic acid	HMDB0000254	C00042	-1.56516	-1.6883	-1.80121	0.0121862	0.0100518	0.00842148	0.666628	0.225281	0.206849	0.191278		0.37407	0.838446	0.787368	0.175547	0.159009	0.341287	0.251999	0.191278	0.17727	0.242501	0.184361	0.146971
Taurine	HMDB0000251	C00245	-0.401622	-0.415565	-1.08176	0.570836	0.550674	0.0979086	30.6437	23.1975	22.9744	14.4777		32.6352	34.5176	24.7782	16.1431	17.8854	35.5639	23.4649	13.7173	31.7409	21.8062	9.22686	12.4
Threonic acid	HMDB0000943	C01620	-0.605778	-1.07054	-1.07249	0.143101	0.0265863	0.0262584	0.0688648	0.0452522	0.0327892	0.0327451		0.0665217	0.078593	0.0614797	0.0280246	0.0453221	0.0624099	0.0190636	0.0299765	0.0493275	0.0393762	0.0377789	0.0210803
trans-Oleic acid	HMDB0000573	C01712	-0.953164	-1.22463	-1.64078	0.0359559	0.0157728	0.00642429	0.774373	0.399963	0.331359	0.248328		0.96305	0.899191	0.46088	0.448336	0.341361	0.410191	0.324852	0.238003	0.431223	0.227698	0.258128	0.259159
Uracil	HMDB0000300	C00106	-0.264612	-1.39456	-1.12433	0.751983	0.0384091	0.0681271	4.82328	4.01501	1.83459	2.21251		4.19782	4.75673	5.5153	4.14926	4.08626	3.80951	0.770056	3.83887	0.894849	3.85331	1.87378	0.910433
Valerylcarnitine	HMDB0013128	-	-1.04358	-1.33597	-2.06555	0.141225	0.0810411	0.0304017	2.04222	0.990728	0.808976	0.487876		0.975605	2.76931	2.38175	0.461691	0.934402	1.57609	0.655789	0.476327	1.29481	0.414407	0.443614	0.605607
