# Supplementary figures and images for: The Toxoplasma monocarboxylate transporters are involved in the metabolism within the apicoplast and are linked to parasite survival
Source: eLife journal article supplement (doi:10.7554/elife.88866), 2023-07-12

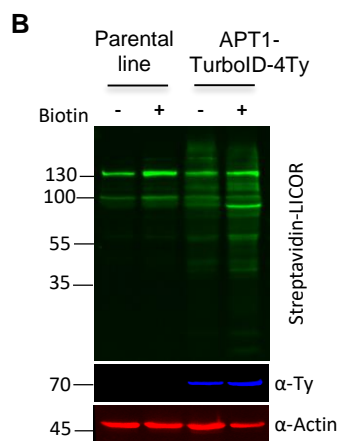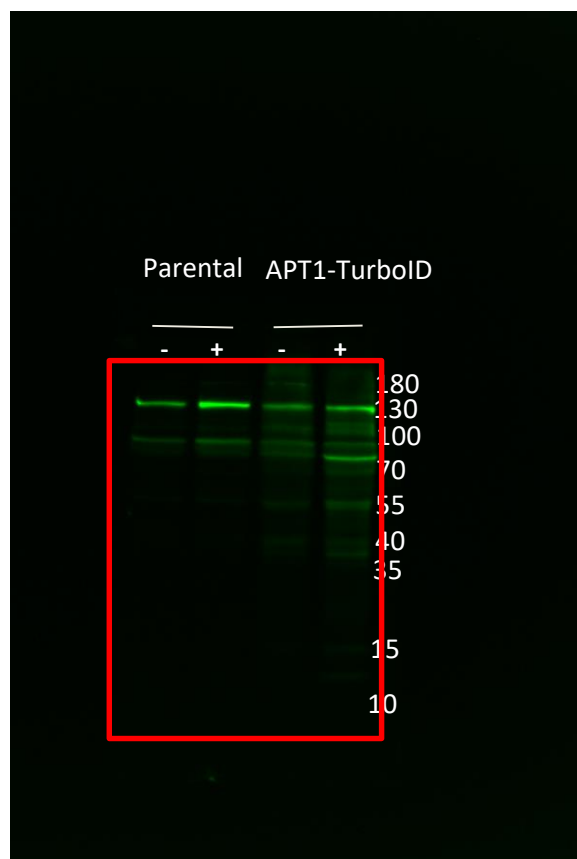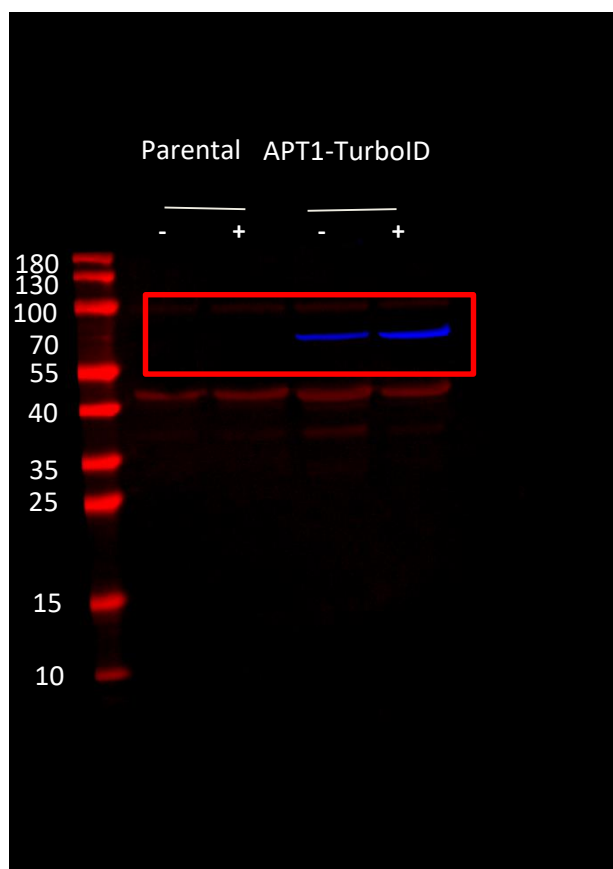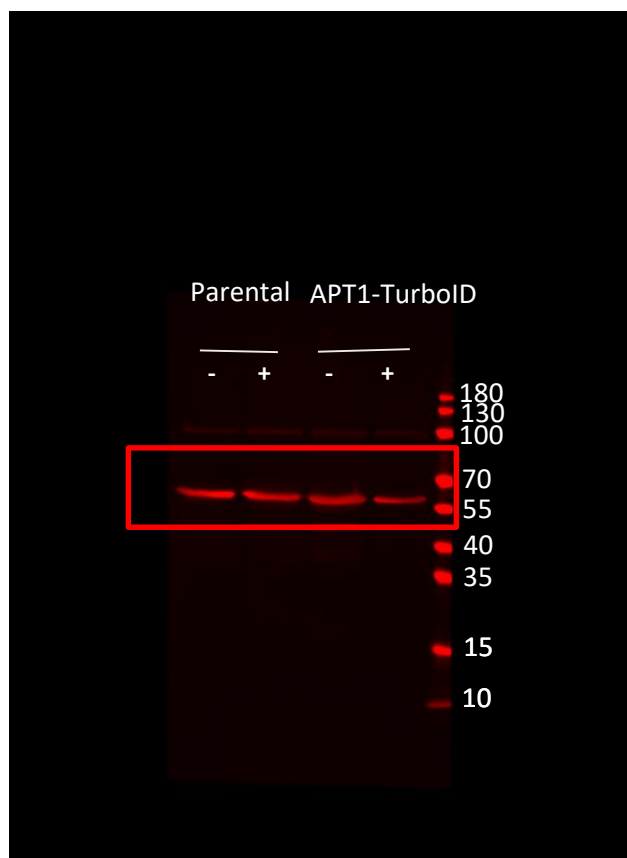

Supplement: fig1-data1 [file elife-88866-fig1-data1-v1.zip]

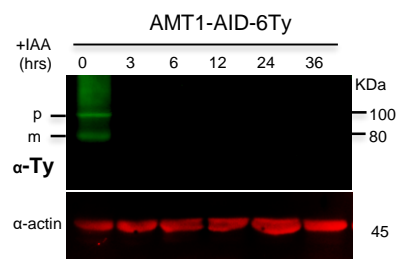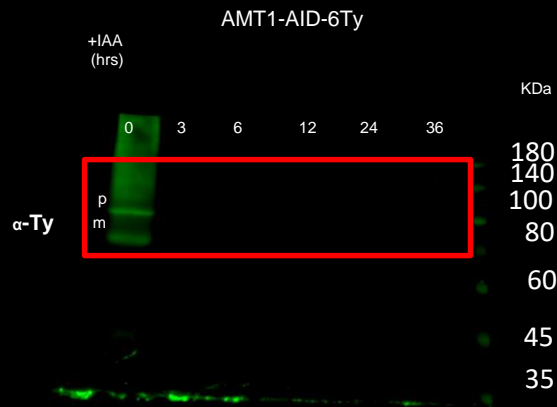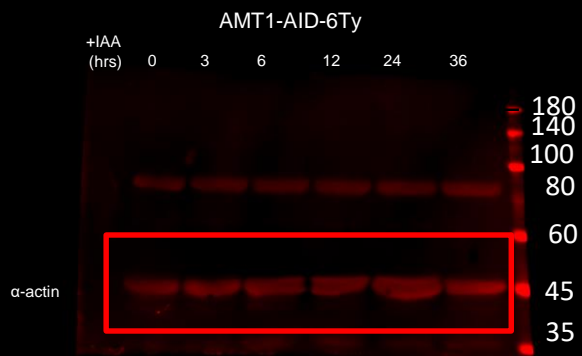

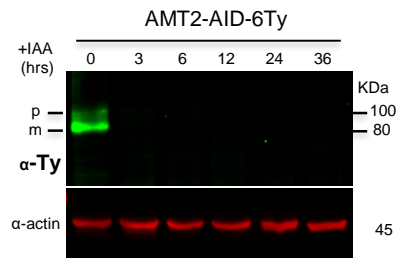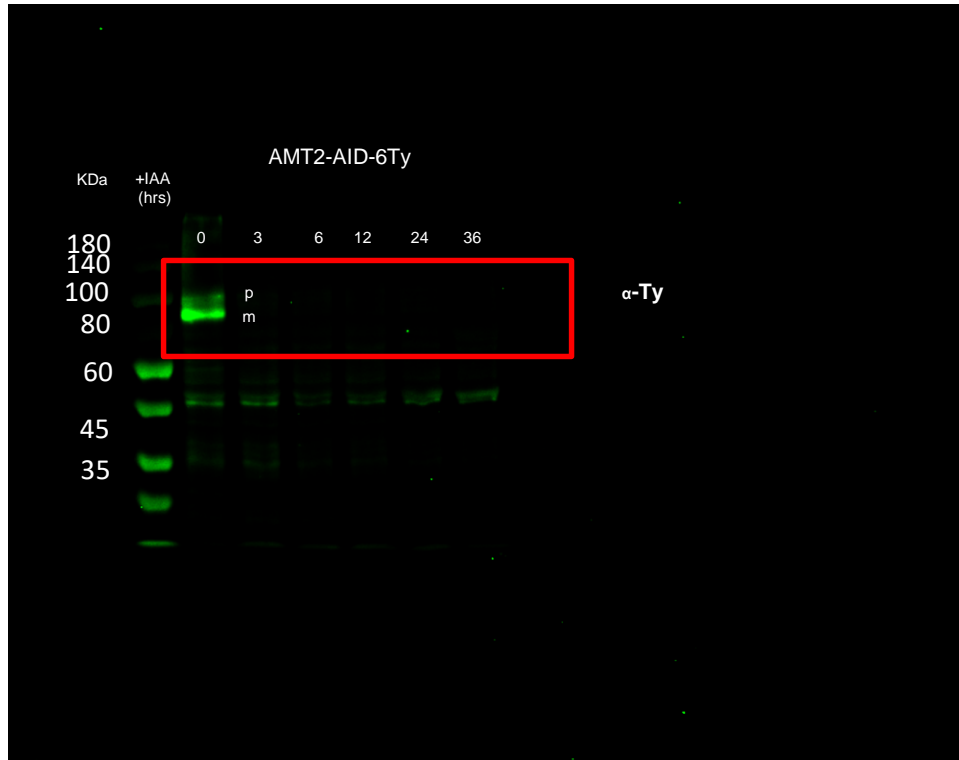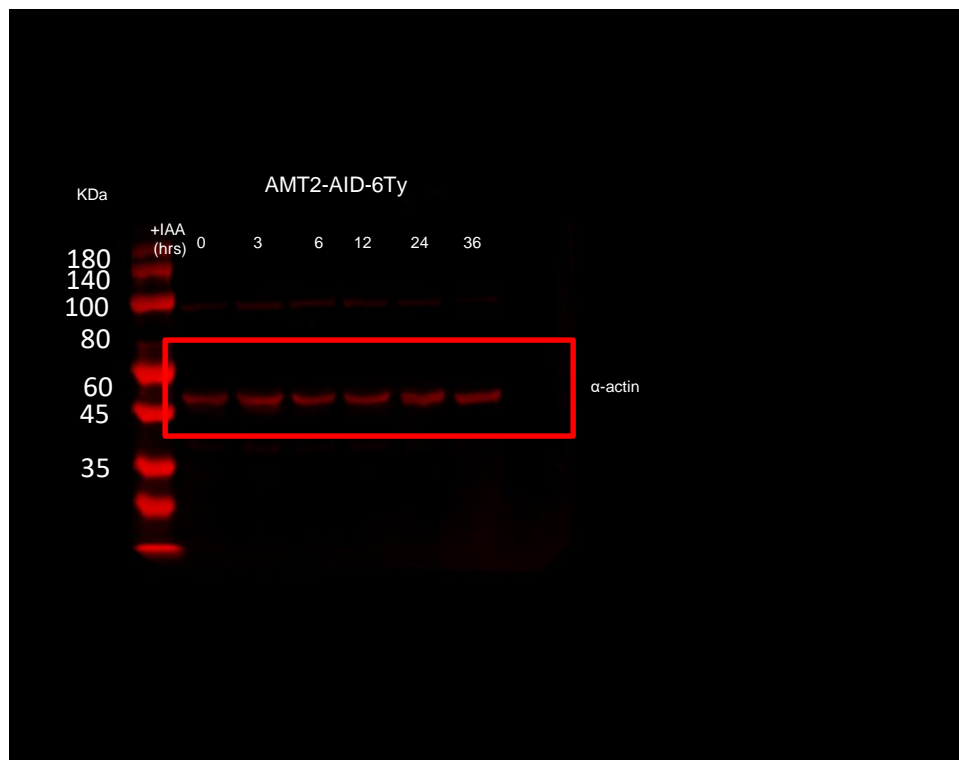

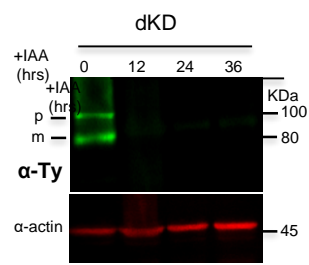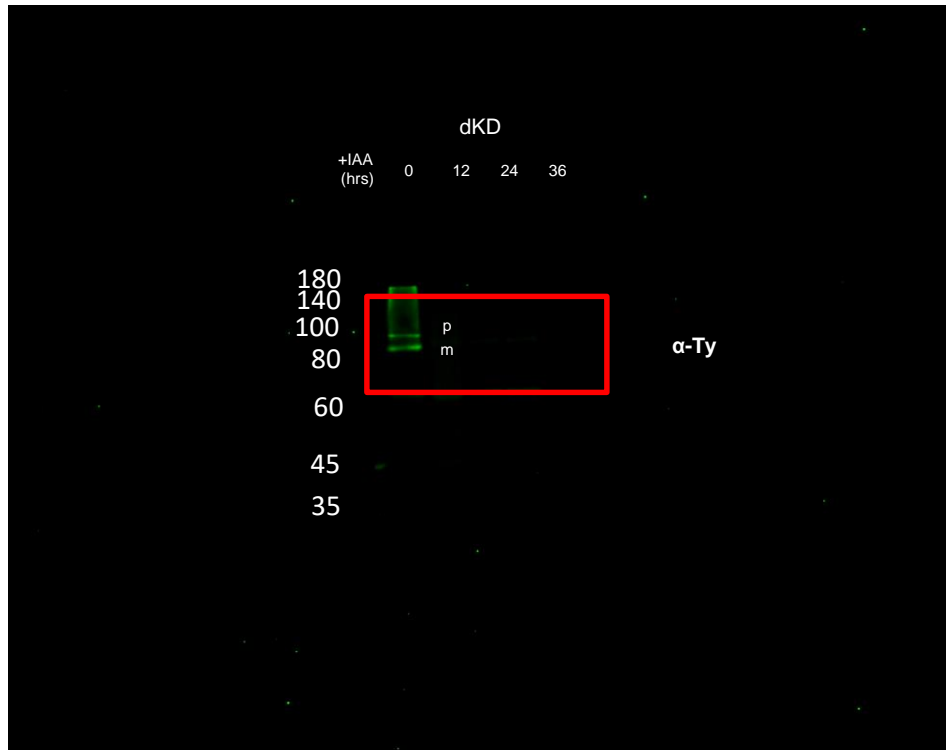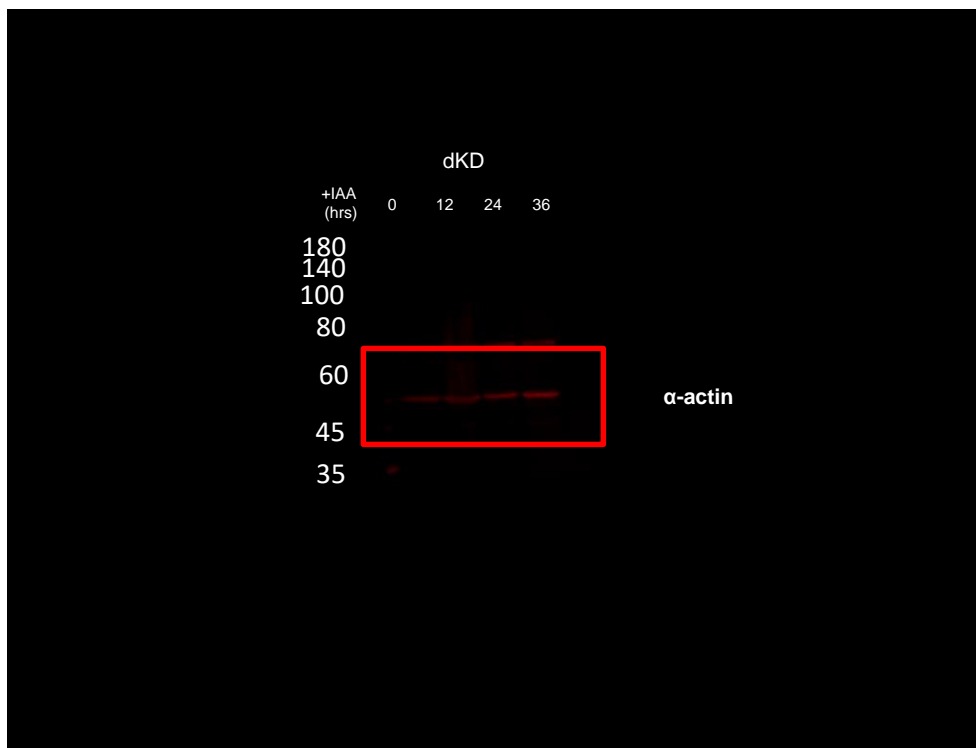

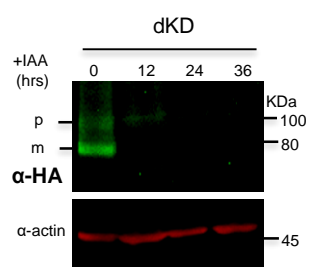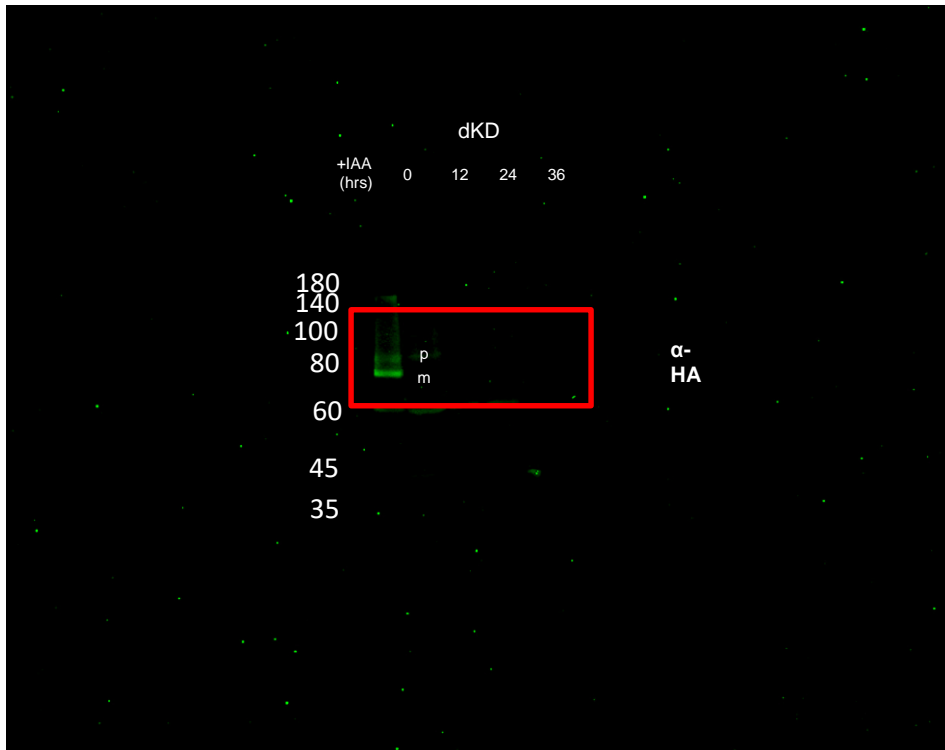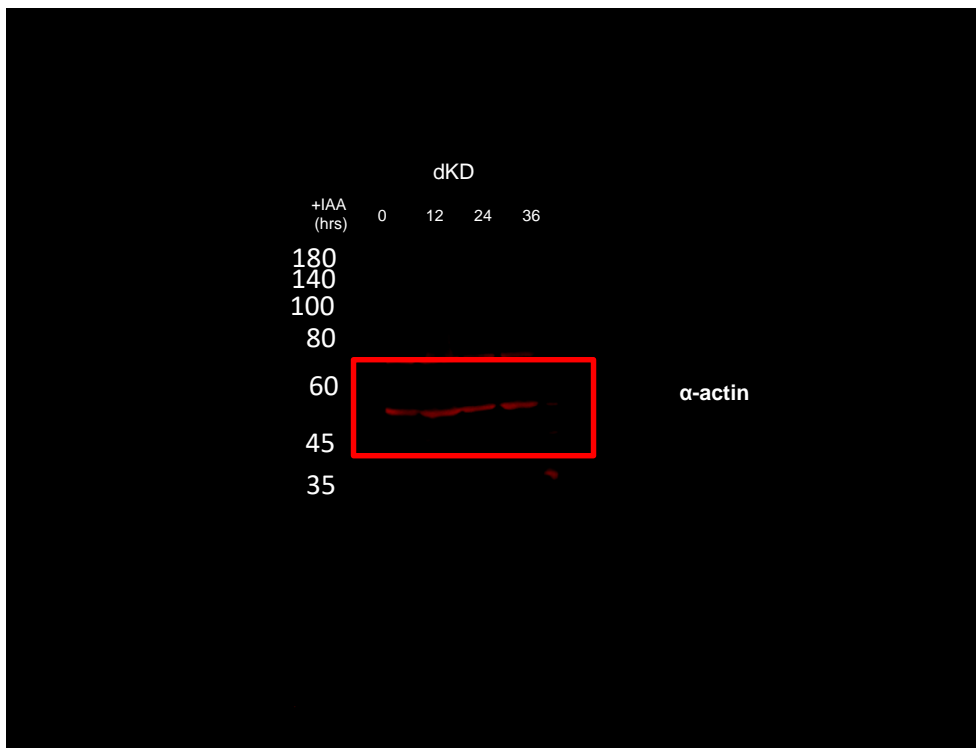

Supplement: fig3-data1 [file elife-88866-fig3-data1-v1.zip]

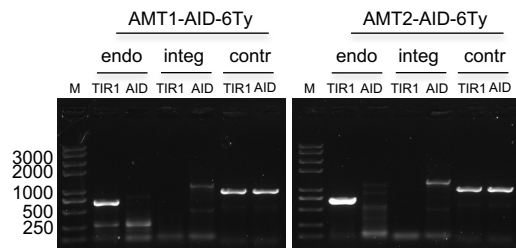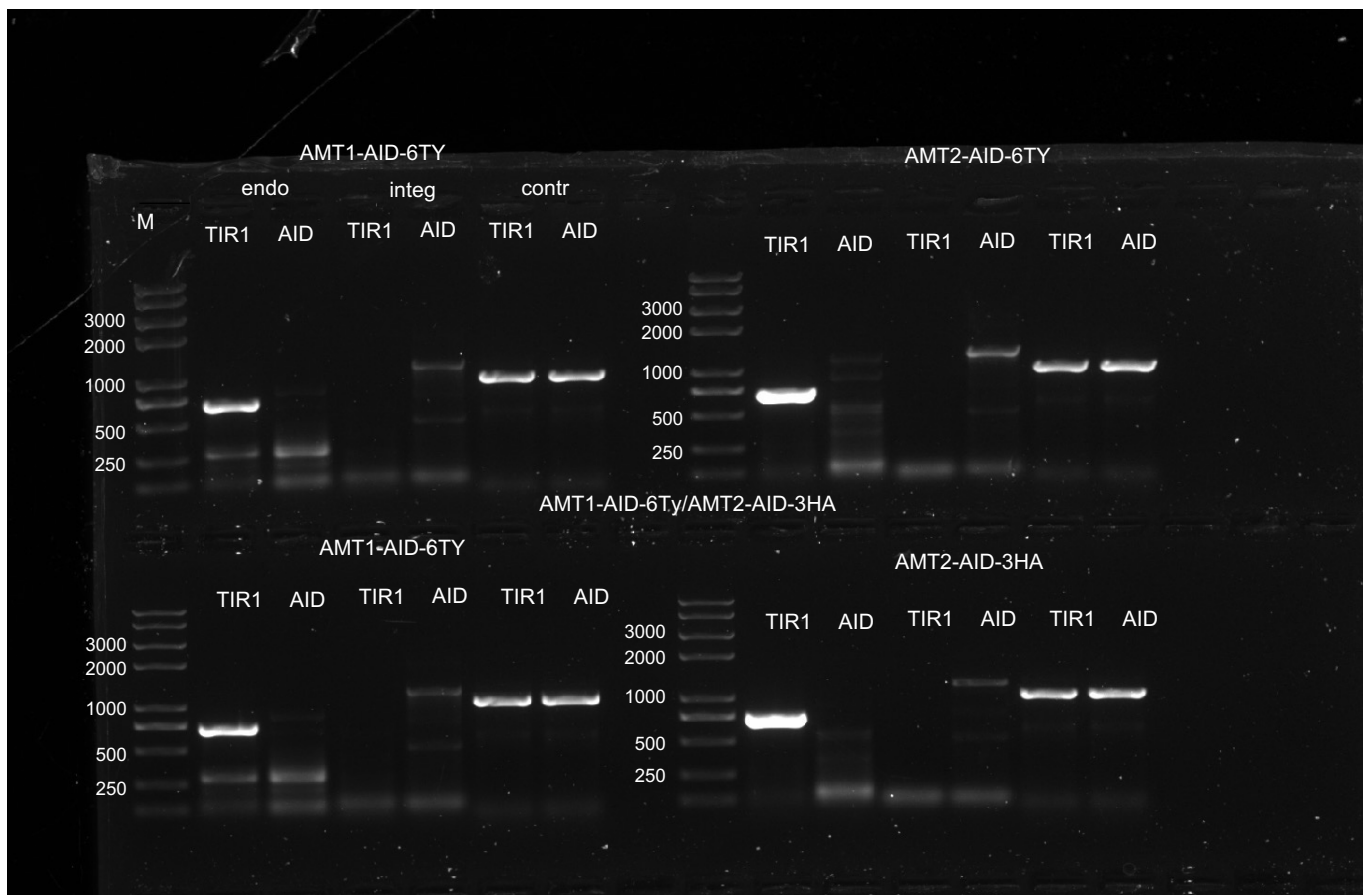

Supplement: fig3-figsupp2-data1 [file elife-88866-fig3-figsupp2-data1-v1.zip]

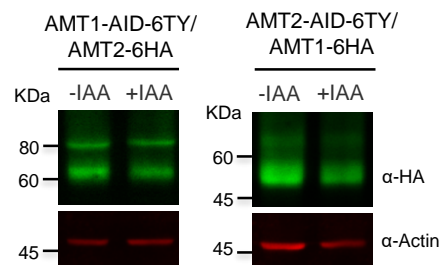

AMT1-AID-6TY/  
AMT2-6HA      AMT1-AID-6TY/  
AMT2-6HA

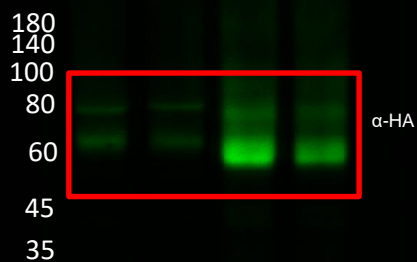

AMT1-AID-6TY/  
AMT2-6HA      AMT1-AID-6TY/  
AMT2-6HA

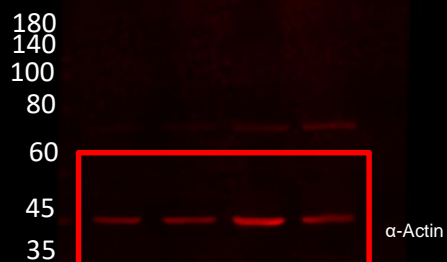

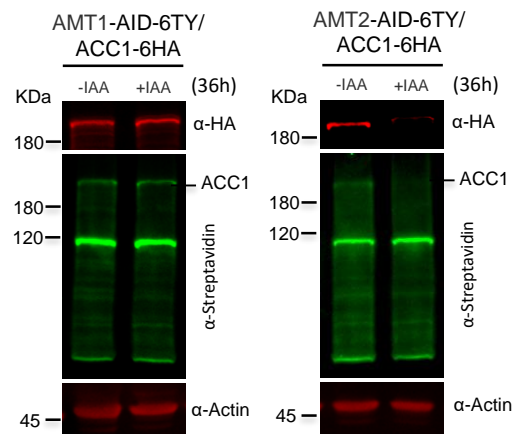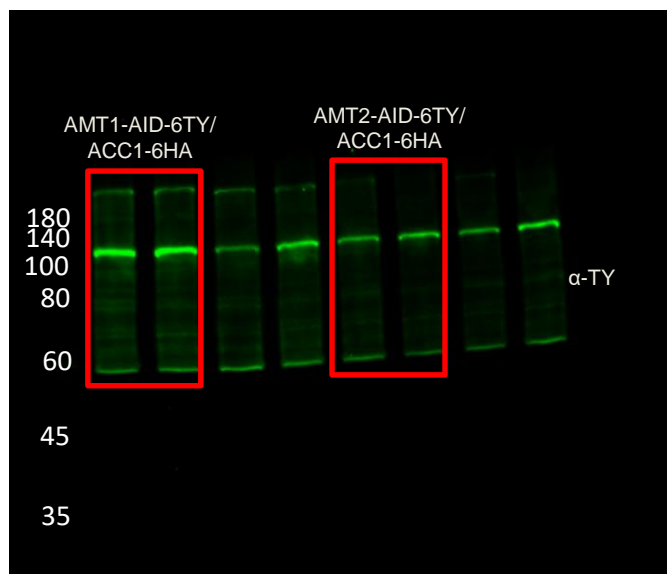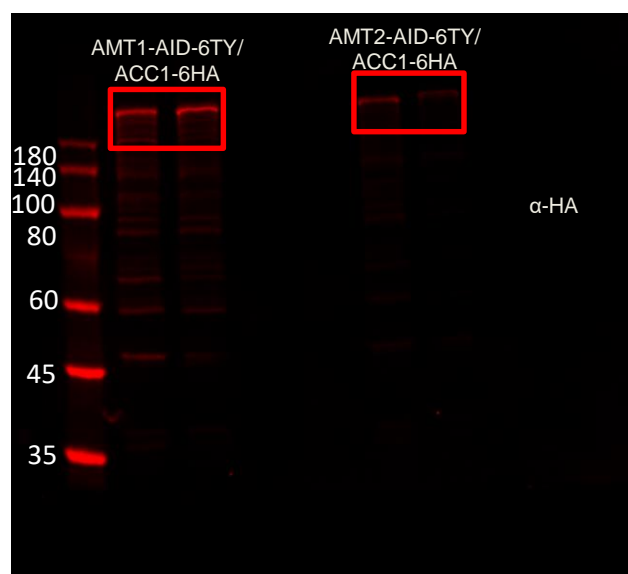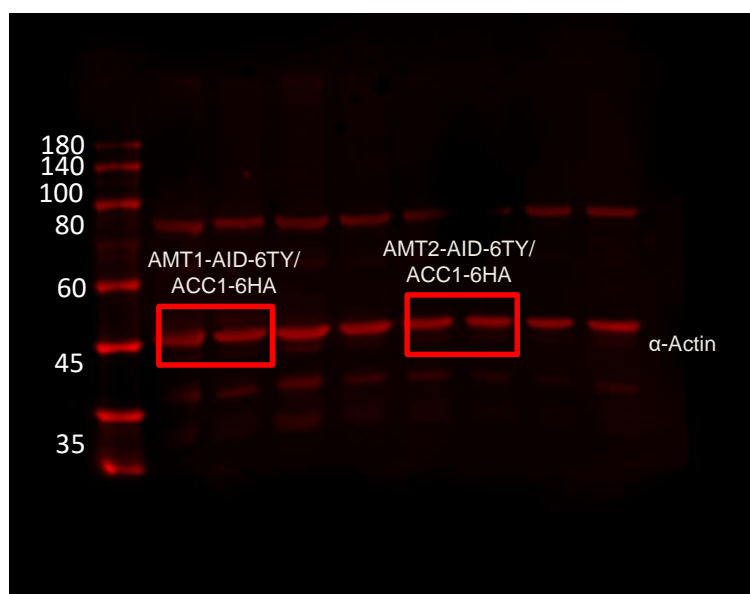

Supplement: fig5-data1 [file elife-88866-fig5-data1-v1.zip]
